# Supplementary material for: Frictional instabilities as an alternative to friction coefficient in fine touch perception
Source: eLife. 2026 Feb 16;14:RP104543. doi: 10.7554/eLife.104543 (PMC12908937; doi:10.7554/eLife.104543)
Supplement: Source data 1. [file elife-104543-data1.xlsx]

## Sheet: C4
VariableName	CellIndex	RowIndex	Time (s)	Force (N)
butyl_10mms_0g_run1	1	1	2.55107	0.532885
butyl_10mms_0g_run1	1	2	2.5555	0.501655
butyl_10mms_0g_run1	1	3	2.5566	0.523912
butyl_10mms_0g_run1	1	4	2.55771	0.523872
butyl_10mms_0g_run1	1	5	2.55881	0.49423
butyl_10mms_0g_run1	1	6	2.55991	0.527752
butyl_10mms_0g_run1	1	7	2.56452	0.495425
butyl_10mms_0g_run1	1	8	2.56566	0.534374
butyl_10mms_0g_run1	1	9	2.56679	0.505515
butyl_10mms_0g_run1	1	10	2.56793	0.522932
butyl_10mms_0g_run1	1	11	2.56906	0.539272
butyl_10mms_0g_run1	1	12	2.57354	0.517936
butyl_10mms_0g_run1	1	13	2.57467	0.502459
butyl_10mms_0g_run1	1	14	2.5758	0.523265
butyl_10mms_0g_run1	1	15	2.57694	0.472836
butyl_10mms_0g_run1	1	16	2.57807	0.501146
butyl_10mms_0g_run1	1	17	2.58254	0.549303
butyl_10mms_0g_run1	1	18	2.58367	0.605414
butyl_10mms_0g_run1	1	19	2.58481	0.611487
butyl_10mms_0g_run1	1	20	2.58594	0.66415
butyl_10mms_0g_run1	1	21	2.58708	0.666403
butyl_10mms_0g_run1	1	22	2.59153	0.755291
butyl_10mms_0g_run1	1	23	2.59267	0.795474
butyl_10mms_0g_run1	1	24	2.59381	0.760993
butyl_10mms_0g_run1	1	25	2.59494	0.801411
butyl_10mms_0g_run1	1	26	2.59608	0.788421
butyl_10mms_0g_run1	1	27	2.60054	0.84898
butyl_10mms_0g_run1	1	28	2.60168	0.843886
butyl_10mms_0g_run1	1	29	2.60281	0.89024
butyl_10mms_0g_run1	1	30	2.60394	0.883305
butyl_10mms_0g_run1	1	31	2.60508	0.867396
butyl_10mms_0g_run1	1	32	2.60954	0.892591
butyl_10mms_0g_run1	1	33	2.61067	0.865182
butyl_10mms_0g_run1	1	34	2.61181	0.918296
butyl_10mms_0g_run1	1	35	2.61294	0.859912
butyl_10mms_0g_run1	1	36	2.61407	0.910792
butyl_10mms_0g_run1	1	37	2.61854	0.920823
butyl_10mms_0g_run1	1	38	2.61967	0.938554
butyl_10mms_0g_run1	1	39	2.62081	0.886361
butyl_10mms_0g_run1	1	40	2.62194	0.917375
butyl_10mms_0g_run1	1	41	2.62307	0.92194
butyl_10mms_0g_run1	1	42	2.62754	0.918472
butyl_10mms_0g_run1	1	43	2.62867	0.924879
butyl_10mms_0g_run1	1	44	2.6298	0.900859
butyl_10mms_0g_run1	1	45	2.63094	0.927151
butyl_10mms_0g_run1	1	46	2.63208	0.896216
butyl_10mms_0g_run1	1	47	2.63654	0.912379
butyl_10mms_0g_run1	1	48	2.63767	0.903641
butyl_10mms_0g_run1	1	49	2.63881	0.921607
butyl_10mms_0g_run1	1	50	2.63994	0.890514
butyl_10mms_0g_run1	1	51	2.64108	0.915357
butyl_10mms_0g_run1	1	52	2.64554	0.889496
butyl_10mms_0g_run1	1	53	2.64667	0.893394
butyl_10mms_0g_run1	1	54	2.6478	0.929267
butyl_10mms_0g_run1	1	55	2.64894	0.874508
butyl_10mms_0g_run1	1	56	2.65007	0.912673
butyl_10mms_0g_run1	1	57	2.65454	0.888457
butyl_10mms_0g_run1	1	58	2.65567	0.922821
butyl_10mms_0g_run1	1	59	2.6568	0.873372
butyl_10mms_0g_run1	1	60	2.65794	0.900212
butyl_10mms_0g_run1	1	61	2.65907	0.903171
butyl_10mms_0g_run1	1	62	2.66354	0.915886
butyl_10mms_0g_run1	1	63	2.66468	0.883422
butyl_10mms_0g_run1	1	64	2.66581	0.901114
butyl_10mms_0g_run1	1	65	2.66694	0.900154
butyl_10mms_0g_run1	1	66	2.66808	0.88207
butyl_10mms_0g_run1	1	67	2.67254	0.872666
butyl_10mms_0g_run1	1	68	2.67368	0.884656
butyl_10mms_0g_run1	1	69	2.67481	0.90846
butyl_10mms_0g_run1	1	70	2.67594	0.865143
butyl_10mms_0g_run1	1	71	2.67708	0.889299
butyl_10mms_0g_run1	1	72	2.68154	0.889358
butyl_10mms_0g_run1	1	73	2.68268	0.908245
butyl_10mms_0g_run1	1	74	2.68381	0.871882
butyl_10mms_0g_run1	1	75	2.68495	0.899546
butyl_10mms_0g_run1	1	76	2.68608	0.901721
butyl_10mms_0g_run1	1	77	2.69054	0.905208
butyl_10mms_0g_run1	1	78	2.69168	0.869923
butyl_10mms_0g_run1	1	79	2.69281	0.877603
butyl_10mms_0g_run1	1	80	2.69395	0.876134
butyl_10mms_0g_run1	1	81	2.69508	0.856895
butyl_10mms_0g_run1	1	82	2.69951	0.871275
butyl_10mms_0g_run1	1	83	2.70061	0.892669
butyl_10mms_0g_run1	1	84	2.70172	0.881874
butyl_10mms_0g_run1	1	85	2.70282	0.909126
butyl_10mms_0g_run1	1	86	2.70392	0.886243
butyl_10mms_0g_run1	1	87	2.70853	0.877936
butyl_10mms_0g_run1	1	88	2.70966	0.85758
butyl_10mms_0g_run1	1	89	2.71079	0.867004
butyl_10mms_0g_run1	1	90	2.71193	0.882344
butyl_10mms_0g_run1	1	91	2.71306	0.853564
butyl_10mms_0g_run1	1	92	2.71754	0.872588
butyl_10mms_0g_run1	1	93	2.71868	0.910948
butyl_10mms_0g_run1	1	94	2.71981	0.874684
butyl_10mms_0g_run1	1	95	2.72095	0.892532
butyl_10mms_0g_run1	1	96	2.72208	0.874508
butyl_10mms_0g_run1	1	97	2.72654	0.885832
butyl_10mms_0g_run1	1	98	2.72768	0.84561
butyl_10mms_0g_run1	1	99	2.72882	0.881796
butyl_10mms_0g_run1	1	100	2.72995	0.862948
butyl_10mms_0g_run1	1	101	2.73108	0.869551
butyl_10mms_0g_run1	1	102	2.73554	0.892669
butyl_10mms_0g_run1	1	103	2.73667	0.872548
butyl_10mms_0g_run1	1	104	2.7378	0.892493
butyl_10mms_0g_run1	1	105	2.73894	0.854544
butyl_10mms_0g_run1	1	106	2.74008	0.88064
butyl_10mms_0g_run1	1	107	2.74455	0.846021
butyl_10mms_0g_run1	1	108	2.74568	0.881326
butyl_10mms_0g_run1	1	109	2.74682	0.854328
butyl_10mms_0g_run1	1	110	2.74795	0.900741
butyl_10mms_0g_run1	1	111	2.74909	0.860362
butyl_10mms_0g_run1	1	112	2.75355	0.898958
butyl_10mms_0g_run1	1	113	2.75468	0.865064
butyl_10mms_0g_run1	1	114	2.75581	0.880816
butyl_10mms_0g_run1	1	115	2.75695	0.874429
butyl_10mms_0g_run1	1	116	2.75808	0.860127
butyl_10mms_0g_run1	1	117	2.76254	0.867513
butyl_10mms_0g_run1	1	118	2.76368	0.868297
butyl_10mms_0g_run1	1	119	2.76481	0.872059
butyl_10mms_0g_run1	1	120	2.76595	0.856189
butyl_10mms_0g_run1	1	121	2.76709	0.895353
butyl_10mms_0g_run1	1	122	2.77154	0.864535
butyl_10mms_0g_run1	1	123	2.77268	0.867082
butyl_10mms_0g_run1	1	124	2.77382	0.857953
butyl_10mms_0g_run1	1	125	2.77495	0.867337
butyl_10mms_0g_run1	1	126	2.77609	0.870099
butyl_10mms_0g_run1	1	127	2.78055	0.869316
butyl_10mms_0g_run1	1	128	2.78168	0.873038
butyl_10mms_0g_run1	1	129	2.78281	0.856091
butyl_10mms_0g_run1	1	130	2.78395	0.887517
butyl_10mms_0g_run1	1	131	2.78509	0.880581
butyl_10mms_0g_run1	1	132	2.78955	0.880816
butyl_10mms_0g_run1	1	133	2.79068	0.851037
butyl_10mms_0g_run1	1	134	2.79182	0.885244
butyl_10mms_0g_run1	1	135	2.79295	0.858423
butyl_10mms_0g_run1	1	136	2.79408	0.840947
butyl_10mms_0g_run1	1	137	2.79854	0.864085
butyl_10mms_0g_run1	1	138	2.79968	0.869277
butyl_10mms_0g_run1	1	139	2.80081	0.887477
butyl_10mms_0g_run1	1	140	2.80195	0.878544
butyl_10mms_0g_run1	1	141	2.80308	0.908578
butyl_10mms_0g_run1	1	142	2.80755	0.86477
butyl_10mms_0g_run1	1	143	2.80868	0.885244
butyl_10mms_0g_run1	1	144	2.80982	0.839908
butyl_10mms_0g_run1	1	145	2.81095	0.868454
butyl_10mms_0g_run1	1	146	2.81208	0.871157
butyl_10mms_0g_run1	1	147	2.81655	0.882344
butyl_10mms_0g_run1	1	148	2.81768	0.855131
butyl_10mms_0g_run1	1	149	2.81882	0.892885
butyl_10mms_0g_run1	1	150	2.81995	0.8883
butyl_10mms_0g_run1	1	151	2.82108	0.855915
butyl_10mms_0g_run1	1	152	2.82555	0.859461
butyl_10mms_0g_run1	1	153	2.82668	0.854406
butyl_10mms_0g_run1	1	154	2.82782	0.867866
butyl_10mms_0g_run1	1	155	2.82895	0.842631
butyl_10mms_0g_run1	1	156	2.83008	0.857345
butyl_10mms_0g_run1	1	157	2.83455	0.859187
butyl_10mms_0g_run1	1	158	2.83568	0.891689
butyl_10mms_0g_run1	1	159	2.83682	0.87676
butyl_10mms_0g_run1	1	160	2.83795	0.879719
butyl_10mms_0g_run1	1	161	2.83909	0.880169
butyl_10mms_0g_run1	1	162	2.84352	0.847118
butyl_10mms_0g_run1	1	163	2.84462	0.829015
butyl_10mms_0g_run1	1	164	2.84572	0.872548
butyl_10mms_0g_run1	1	165	2.84682	0.854406
butyl_10mms_0g_run1	1	166	2.84793	0.869766
butyl_10mms_0g_run1	1	167	2.85254	0.884264
butyl_10mms_0g_run1	1	168	2.85367	0.858305
butyl_10mms_0g_run1	1	169	2.8548	0.858775
butyl_10mms_0g_run1	1	170	2.85594	0.872372
butyl_10mms_0g_run1	1	171	2.85707	0.859794
butyl_10mms_0g_run1	1	172	2.86155	0.836695
butyl_10mms_0g_run1	1	173	2.86269	0.86767
butyl_10mms_0g_run1	1	174	2.86382	0.87872
butyl_10mms_0g_run1	1	175	2.86495	0.845394
butyl_10mms_0g_run1	1	176	2.86609	0.887497
butyl_10mms_0g_run1	1	177	2.87055	0.868434
butyl_10mms_0g_run1	1	178	2.87169	0.891141
butyl_10mms_0g_run1	1	179	2.87282	0.836225
butyl_10mms_0g_run1	1	180	2.87396	0.888907
butyl_10mms_0g_run1	1	181	2.87509	0.859324
butyl_10mms_0g_run1	1	182	2.87955	0.882795
butyl_10mms_0g_run1	1	183	2.88068	0.866455
butyl_10mms_0g_run1	1	184	2.88181	0.861792
butyl_10mms_0g_run1	1	185	2.88295	0.878014
butyl_10mms_0g_run1	1	186	2.88408	0.857482
butyl_10mms_0g_run1	1	187	2.88856	0.847255
butyl_10mms_0g_run1	1	188	2.88969	0.884617
butyl_10mms_0g_run1	1	189	2.89082	0.873352
butyl_10mms_0g_run1	1	190	2.89196	0.847863
butyl_10mms_0g_run1	1	191	2.89309	0.874194
butyl_10mms_0g_run1	1	192	2.89755	0.856875
butyl_10mms_0g_run1	1	193	2.89868	0.876271
butyl_10mms_0g_run1	1	194	2.89982	0.864006
butyl_10mms_0g_run1	1	195	2.90095	0.856992
butyl_10mms_0g_run1	1	196	2.90209	0.88928
butyl_10mms_0g_run1	1	197	2.90655	0.863575
butyl_10mms_0g_run1	1	198	2.90768	0.880091
butyl_10mms_0g_run1	1	199	2.90882	0.840457
butyl_10mms_0g_run1	1	200	2.90996	0.871157
butyl_10mms_0g_run1	1	201	2.91109	0.838654
butyl_10mms_0g_run1	1	202	2.91555	0.887007
butyl_10mms_0g_run1	1	203	2.91669	0.844414
butyl_10mms_0g_run1	1	204	2.91782	0.880013
butyl_10mms_0g_run1	1	205	2.91896	0.880032
butyl_10mms_0g_run1	1	206	2.92009	0.868551
butyl_10mms_0g_run1	1	207	2.92456	0.841045
butyl_10mms_0g_run1	1	208	2.92569	0.869492
butyl_10mms_0g_run1	1	209	2.92683	0.81967
butyl_10mms_0g_run1	1	210	2.92796	0.838635
butyl_10mms_0g_run1	1	211	2.92909	0.869707
butyl_10mms_0g_run1	1	212	2.93355	0.851487
butyl_10mms_0g_run1	1	213	2.93469	0.88685
butyl_10mms_0g_run1	1	214	2.93582	0.86048
butyl_10mms_0g_run1	1	215	2.93696	0.866729
butyl_10mms_0g_run1	1	216	2.93809	0.852858
butyl_10mms_0g_run1	1	217	2.94255	0.87676
butyl_10mms_0g_run1	1	218	2.94369	0.83456
butyl_10mms_0g_run1	1	219	2.94482	0.850527
butyl_10mms_0g_run1	1	220	2.94596	0.858207
butyl_10mms_0g_run1	1	221	2.94709	0.848999
butyl_10mms_0g_run1	1	222	2.95155	0.864163
butyl_10mms_0g_run1	1	223	2.95269	0.872509
butyl_10mms_0g_run1	1	224	2.95382	0.881463
butyl_10mms_0g_run1	1	225	2.95496	0.848117
butyl_10mms_0g_run1	1	226	2.95609	0.860228
butyl_10mms_0g_run1	1	227	2.96056	0.833387
butyl_10mms_0g_run1	1	228	2.96169	0.862069
butyl_10mms_0g_run1	1	229	2.96283	0.842791
butyl_10mms_0g_run1	1	230	2.96396	0.867144
butyl_10mms_0g_run1	1	231	2.9651	0.853233
butyl_10mms_0g_run1	1	232	2.96956	0.888989
butyl_10mms_0g_run1	1	233	2.97069	0.873766
butyl_10mms_0g_run1	1	234	2.97182	0.849844
butyl_10mms_0g_run1	1	235	2.97296	0.865498
butyl_10mms_0g_run1	1	236	2.97409	0.847238
butyl_10mms_0g_run1	1	237	2.97856	0.87355
butyl_10mms_0g_run1	1	238	2.97969	0.81789
butyl_10mms_0g_run1	1	239	2.98082	0.842575
butyl_10mms_0g_run1	1	240	2.98196	0.828743
butyl_10mms_0g_run1	1	241	2.98309	0.797788
butyl_10mms_0g_run1	1	242	2.98752	0.734565
butyl_10mms_0g_run1	1	243	2.98863	0.741971
butyl_10mms_0g_run1	1	244	2.98973	0.727747
butyl_10mms_0g_run1	1	245	2.99083	0.721204
butyl_10mms_0g_run1	1	246	2.99193	0.720381
butyl_10mms_0g_run1	1	247	2.99654	0.707156
butyl_10mms_0g_run1	1	248	2.99768	0.713543
butyl_10mms_0g_run1	1	249	2.99881	0.745928
butyl_10mms_0g_run1	1	250	2.99995	0.70408
butyl_10mms_0g_run1	1	251	3.00108	0.744557
butyl_10mms_0g_run1	1	252	3.00556	0.728257
butyl_10mms_0g_run1	1	253	3.00669	0.690523
butyl_10mms_0g_run1	1	254	3.00783	0.712172
butyl_10mms_0g_run1	1	255	3.00896	0.699829
butyl_10mms_0g_run1	1	256	3.01009	0.650104
butyl_10mms_0g_run1	1	257	3.01455	0.702356
butyl_10mms_0g_run1	1	258	3.01569	0.685135
butyl_10mms_0g_run1	1	259	3.01682	0.7089
butyl_10mms_0g_run1	1	260	3.01796	0.693422
butyl_10mms_0g_run1	1	261	3.01909	0.707391
butyl_10mms_0g_run1	1	262	3.02355	0.673811
butyl_10mms_0g_run1	1	263	3.02469	0.694578
butyl_10mms_0g_run1	1	264	3.02582	0.685566
butyl_10mms_0g_run1	1	265	3.02696	0.660488
butyl_10mms_0g_run1	1	266	3.0281	0.676005
butyl_10mms_0g_run1	1	267	3.03256	0.698986
butyl_10mms_0g_run1	1	268	3.0337	0.673066
butyl_10mms_0g_run1	2	1	3.59286	0.547262
butyl_10mms_0g_run1	2	2	3.59399	0.551827
butyl_10mms_0g_run1	2	3	3.59512	0.561819
butyl_10mms_0g_run1	2	4	3.59958	0.570596
butyl_10mms_0g_run1	2	5	3.60072	0.547517
butyl_10mms_0g_run1	2	6	3.60185	0.574123
butyl_10mms_0g_run1	2	7	3.60299	0.583194
butyl_10mms_0g_run1	2	8	3.60412	0.543775
butyl_10mms_0g_run1	2	9	3.60859	0.542796
butyl_10mms_0g_run1	2	10	3.60972	0.54832
butyl_10mms_0g_run1	2	11	3.61085	0.553062
butyl_10mms_0g_run1	2	12	3.61199	0.543736
butyl_10mms_0g_run1	2	13	3.61312	0.563406
butyl_10mms_0g_run1	2	14	3.61758	0.533
butyl_10mms_0g_run1	2	15	3.61871	0.587876
butyl_10mms_0g_run1	2	16	3.61985	0.560487
butyl_10mms_0g_run1	2	17	3.62098	0.557215
butyl_10mms_0g_run1	2	18	3.62212	0.564288
butyl_10mms_0g_run1	2	19	3.62659	0.558763
butyl_10mms_0g_run1	2	20	3.62772	0.529493
butyl_10mms_0g_run1	2	21	3.62885	0.536213
butyl_10mms_0g_run1	2	22	3.62999	0.563543
butyl_10mms_0g_run1	2	23	3.63112	0.532902
butyl_10mms_0g_run1	2	24	3.63559	0.571439
butyl_10mms_0g_run1	2	25	3.63672	0.550573
butyl_10mms_0g_run1	2	26	3.63785	0.598554
butyl_10mms_0g_run1	2	27	3.63899	0.566502
butyl_10mms_0g_run1	2	28	3.64012	0.585466
butyl_10mms_0g_run1	2	29	3.64459	0.65106
butyl_10mms_0g_run1	2	30	3.64572	0.725175
butyl_10mms_0g_run1	2	31	3.64686	0.712911
butyl_10mms_0g_run1	2	32	3.64799	0.762047
butyl_10mms_0g_run1	2	33	3.64913	0.791082
butyl_10mms_0g_run1	2	34	3.65359	0.826955
butyl_10mms_0g_run1	2	35	3.65472	0.847252
butyl_10mms_0g_run1	2	36	3.65586	0.831226
butyl_10mms_0g_run1	2	37	3.65699	0.867353
butyl_10mms_0g_run1	2	38	3.65813	0.852463
butyl_10mms_0g_run1	2	39	3.66259	0.900737
butyl_10mms_0g_run1	2	40	3.66372	0.894644
butyl_10mms_0g_run1	2	41	3.66485	0.915999
butyl_10mms_0g_run1	2	42	3.66599	0.935375
butyl_10mms_0g_run1	2	43	3.66712	0.906771
butyl_10mms_0g_run1	2	44	3.67159	0.911258
butyl_10mms_0g_run1	2	45	3.67273	0.92076
butyl_10mms_0g_run1	2	46	3.67386	0.925109
butyl_10mms_0g_run1	2	47	3.675	0.911238
butyl_10mms_0g_run1	2	48	3.67613	0.929751
butyl_10mms_0g_run1	2	49	3.68059	0.909298
butyl_10mms_0g_run1	2	50	3.68172	0.966956
butyl_10mms_0g_run1	2	51	3.68285	0.927205
butyl_10mms_0g_run1	2	52	3.68399	0.941546
butyl_10mms_0g_run1	2	53	3.68512	0.97779
butyl_10mms_0g_run1	2	54	3.68959	0.964899
butyl_10mms_0g_run1	2	55	3.69072	0.921601
butyl_10mms_0g_run1	2	56	3.69186	0.932494
butyl_10mms_0g_run1	2	57	3.693	0.934081
butyl_10mms_0g_run1	2	58	3.69413	0.893761
butyl_10mms_0g_run1	2	59	3.69859	0.92119
butyl_10mms_0g_run1	2	60	3.69973	0.914744
butyl_10mms_0g_run1	2	61	3.70086	0.945719
butyl_10mms_0g_run1	2	62	3.702	0.919289
butyl_10mms_0g_run1	2	63	3.70313	0.947678
butyl_10mms_0g_run1	2	64	3.70756	0.90393
butyl_10mms_0g_run1	2	65	3.70866	0.928929
butyl_10mms_0g_run1	2	66	3.70976	0.915312
butyl_10mms_0g_run1	2	67	3.71086	0.880419
butyl_10mms_0g_run1	2	68	3.71197	0.945621
butyl_10mms_0g_run1	2	69	3.71658	0.885768
butyl_10mms_0g_run1	2	70	3.71771	0.932142
butyl_10mms_0g_run1	2	71	3.71885	0.909866
butyl_10mms_0g_run1	2	72	3.71998	0.912472
butyl_10mms_0g_run1	2	73	3.72112	0.920112
butyl_10mms_0g_run1	2	74	3.72559	0.909885
butyl_10mms_0g_run1	2	75	3.72673	0.84441
butyl_10mms_0g_run1	2	76	3.72786	0.894721
butyl_10mms_0g_run1	2	77	3.72899	0.889569
butyl_10mms_0g_run1	2	78	3.73013	0.889275
butyl_10mms_0g_run1	2	79	3.73459	0.895074
butyl_10mms_0g_run1	2	80	3.73572	0.897425
butyl_10mms_0g_run1	2	81	3.73685	0.902186
butyl_10mms_0g_run1	2	82	3.73799	0.881419
butyl_10mms_0g_run1	2	83	3.73913	0.904792
butyl_10mms_0g_run1	2	84	3.74359	0.850914
butyl_10mms_0g_run1	2	85	3.74472	0.898836
butyl_10mms_0g_run1	2	86	3.74586	0.872132
butyl_10mms_0g_run1	2	87	3.74699	0.893213
butyl_10mms_0g_run1	2	88	3.74813	0.901422
butyl_10mms_0g_run1	2	89	3.7526	0.924246
butyl_10mms_0g_run1	2	90	3.75373	0.879851
butyl_10mms_0g_run1	2	91	3.75486	0.885925
butyl_10mms_0g_run1	2	92	3.756	0.879773
butyl_10mms_0g_run1	2	93	3.75713	0.865706
butyl_10mms_0g_run1	2	94	3.76159	0.868997
butyl_10mms_0g_run1	2	95	3.76273	0.865432
butyl_10mms_0g_run1	2	96	3.76386	0.897405
butyl_10mms_0g_run1	2	97	3.76499	0.863649
butyl_10mms_0g_run1	2	98	3.76613	0.88661
butyl_10mms_0g_run1	2	99	3.77059	0.873445
butyl_10mms_0g_run1	2	100	3.77173	0.890666
butyl_10mms_0g_run1	2	101	3.77286	0.864393
butyl_10mms_0g_run1	2	102	3.77399	0.874033
butyl_10mms_0g_run1	2	103	3.77513	0.882281
butyl_10mms_0g_run1	2	104	3.77959	0.871172
butyl_10mms_0g_run1	2	105	3.78073	0.869997
butyl_10mms_0g_run1	2	106	3.78186	0.87272
butyl_10mms_0g_run1	2	107	3.783	0.881105
butyl_10mms_0g_run1	2	108	3.78413	0.86743
butyl_10mms_0g_run1	2	109	3.7886	0.880988
butyl_10mms_0g_run1	2	110	3.78973	0.861122
butyl_10mms_0g_run1	2	111	3.79087	0.886277
butyl_10mms_0g_run1	2	112	3.792	0.858535
butyl_10mms_0g_run1	2	113	3.79314	0.887296
butyl_10mms_0g_run1	2	114	3.79759	0.877246
butyl_10mms_0g_run1	2	115	3.79872	0.854343
butyl_10mms_0g_run1	2	116	3.79986	0.898072
butyl_10mms_0g_run1	2	117	3.80099	0.857477
butyl_10mms_0g_run1	2	118	3.80212	0.900188
butyl_10mms_0g_run1	2	119	3.80659	0.855303
butyl_10mms_0g_run1	2	120	3.80773	0.896563
butyl_10mms_0g_run1	2	121	3.80886	0.852501
butyl_10mms_0g_run1	2	122	3.81	0.853011
butyl_10mms_0g_run1	2	123	3.81113	0.859045
butyl_10mms_0g_run1	2	124	3.8156	0.89333
butyl_10mms_0g_run1	2	125	3.81673	0.857164
butyl_10mms_0g_run1	2	126	3.81786	0.874934
butyl_10mms_0g_run1	2	127	3.819	0.89717
butyl_10mms_0g_run1	2	128	3.82013	0.84445
butyl_10mms_0g_run1	2	129	3.8246	0.859653
butyl_10mms_0g_run1	2	130	3.82573	0.872839
butyl_10mms_0g_run1	2	131	3.82687	0.862592
butyl_10mms_0g_run1	2	132	3.828	0.833675
butyl_10mms_0g_run1	2	133	3.82913	0.875777
butyl_10mms_0g_run1	2	134	3.8336	0.861025
butyl_10mms_0g_run1	2	135	3.83473	0.891588
butyl_10mms_0g_run1	2	136	3.83587	0.863043
butyl_10mms_0g_run1	2	137	3.837	0.88669
butyl_10mms_0g_run1	2	138	3.83814	0.859967
butyl_10mms_0g_run1	2	139	3.8426	0.874524
butyl_10mms_0g_run1	2	140	3.84373	0.846488
butyl_10mms_0g_run1	2	141	3.84487	0.854873
butyl_10mms_0g_run1	2	142	3.846	0.880852
butyl_10mms_0g_run1	2	143	3.84714	0.844313
butyl_10mms_0g_run1	2	144	3.85156	0.879088
butyl_10mms_0g_run1	2	145	3.85267	0.895741
butyl_10mms_0g_run1	2	146	3.85377	0.87039
butyl_10mms_0g_run1	2	147	3.85487	0.874602
butyl_10mms_0g_run1	2	148	3.85598	0.849446
butyl_10mms_0g_run1	2	149	3.86058	0.861554
butyl_10mms_0g_run1	2	150	3.86172	0.861632
butyl_10mms_0g_run1	2	151	3.86286	0.870213
butyl_10mms_0g_run1	2	152	3.86399	0.845116
butyl_10mms_0g_run1	2	153	3.86513	0.885593
butyl_10mms_0g_run1	2	154	3.8696	0.876306
butyl_10mms_0g_run1	2	155	3.87073	0.888669
butyl_10mms_0g_run1	2	156	3.87187	0.84639
butyl_10mms_0g_run1	2	157	3.873	0.88863
butyl_10mms_0g_run1	2	158	3.87414	0.864963
butyl_10mms_0g_run1	2	159	3.87859	0.886533
butyl_10mms_0g_run1	2	160	3.87973	0.846213
butyl_10mms_0g_run1	2	161	3.88087	0.874622
butyl_10mms_0g_run1	2	162	3.882	0.876992
butyl_10mms_0g_run1	2	163	3.88314	0.845038
butyl_10mms_0g_run1	2	164	3.8876	0.864786
butyl_10mms_0g_run1	2	165	3.88873	0.851738
butyl_10mms_0g_run1	2	166	3.88987	0.888806
butyl_10mms_0g_run1	2	167	3.891	0.841296
butyl_10mms_0g_run1	2	168	3.89214	0.88189
butyl_10mms_0g_run1	2	169	3.8966	0.849466
butyl_10mms_0g_run1	2	170	3.89774	0.892666
butyl_10mms_0g_run1	2	171	3.89887	0.840101
butyl_10mms_0g_run1	2	172	3.9	0.877678
butyl_10mms_0g_run1	2	173	3.90113	0.873309
butyl_10mms_0g_run1	2	174	3.9056	0.880421
butyl_10mms_0g_run1	2	175	3.90674	0.850308
butyl_10mms_0g_run1	2	176	3.90787	0.865942
butyl_10mms_0g_run1	2	177	3.90901	0.865942
butyl_10mms_0g_run1	2	178	3.91014	0.826935
butyl_10mms_0g_run1	2	179	3.9146	0.870997
butyl_10mms_0g_run1	2	180	3.91573	0.851562
butyl_10mms_0g_run1	2	181	3.91687	0.874739
butyl_10mms_0g_run1	2	182	3.918	0.859418
butyl_10mms_0g_run1	2	183	3.91914	0.875856
butyl_10mms_0g_run1	2	184	3.9236	0.849133
butyl_10mms_0g_run1	2	185	3.92473	0.858164
butyl_10mms_0g_run1	2	186	3.92586	0.879735
butyl_10mms_0g_run1	2	187	3.927	0.813828
butyl_10mms_0g_run1	2	188	3.92813	0.871389
butyl_10mms_0g_run1	2	189	3.9326	0.858321
butyl_10mms_0g_run1	2	190	3.93374	0.881596
butyl_10mms_0g_run1	2	191	3.93487	0.842726
butyl_10mms_0g_run1	2	192	3.936	0.897936
butyl_10mms_0g_run1	2	193	3.93714	0.865844
butyl_10mms_0g_run1	2	194	3.9416	0.887082
butyl_10mms_0g_run1	2	195	3.94273	0.834909
butyl_10mms_0g_run1	2	196	3.94387	0.848741
butyl_10mms_0g_run1	2	197	3.945	0.870115
butyl_10mms_0g_run1	2	198	3.94614	0.838651
butyl_10mms_0g_run1	2	199	3.9506	0.856813
butyl_10mms_0g_run1	2	200	3.95173	0.892626
butyl_10mms_0g_run1	2	201	3.95287	0.89243
butyl_10mms_0g_run1	2	202	3.954	0.855402
butyl_10mms_0g_run1	2	203	3.95514	0.876933
butyl_10mms_0g_run1	2	204	3.9596	0.843588
butyl_10mms_0g_run1	2	205	3.96074	0.864786
butyl_10mms_0g_run1	2	206	3.96187	0.861123
butyl_10mms_0g_run1	2	207	3.96301	0.8718
butyl_10mms_0g_run1	2	208	3.96414	0.850347
butyl_10mms_0g_run1	2	209	3.9686	0.882066
butyl_10mms_0g_run1	2	210	3.96974	0.872623
butyl_10mms_0g_run1	2	211	3.97087	0.854539
butyl_10mms_0g_run1	2	212	3.972	0.871761
butyl_10mms_0g_run1	2	213	3.97314	0.847937
butyl_10mms_0g_run1	2	214	3.9776	0.854343
butyl_10mms_0g_run1	2	215	3.97874	0.831108
butyl_10mms_0g_run1	2	216	3.97987	0.868352
butyl_10mms_0g_run1	2	217	3.98101	0.854324
butyl_10mms_0g_run1	2	218	3.98214	0.853031
butyl_10mms_0g_run1	2	219	3.98661	0.857028
butyl_10mms_0g_run1	2	220	3.98774	0.878872
butyl_10mms_0g_run1	2	221	3.98888	0.852619
butyl_10mms_0g_run1	2	222	3.99001	0.84921
butyl_10mms_0g_run1	2	223	3.99114	0.871584
butyl_10mms_0g_run1	2	224	3.99557	0.852502
butyl_10mms_0g_run1	2	225	3.99667	0.845253
butyl_10mms_0g_run1	2	226	3.99777	0.88571
butyl_10mms_0g_run1	2	227	3.99888	0.833184
butyl_10mms_0g_run1	2	228	3.99998	0.867607
butyl_10mms_0g_run1	2	229	4.00459	0.852619
butyl_10mms_0g_run1	2	230	4.00572	0.879382
butyl_10mms_0g_run1	2	231	4.00686	0.835242
butyl_10mms_0g_run1	2	232	4.00799	0.868038
butyl_10mms_0g_run1	2	233	4.00912	0.86986
butyl_10mms_0g_run1	2	234	4.01361	0.847173
butyl_10mms_0g_run1	2	235	4.01474	0.858007
butyl_10mms_0g_run1	2	236	4.01587	0.87082
butyl_10mms_0g_run1	2	237	4.01701	0.84253
butyl_10mms_0g_run1	2	238	4.01814	0.886611
butyl_10mms_0g_run1	2	239	4.02261	0.835653
butyl_10mms_0g_run1	2	240	4.02374	0.873367
butyl_10mms_0g_run1	2	241	4.02487	0.835163
butyl_10mms_0g_run1	2	242	4.02601	0.873347
butyl_10mms_0g_run1	2	243	4.02714	0.832107
butyl_10mms_0g_run1	2	244	4.0316	0.859496
butyl_10mms_0g_run1	2	245	4.03274	0.866706
butyl_10mms_0g_run1	2	246	4.03387	0.855088
butyl_10mms_0g_run1	2	247	4.03501	0.905047
butyl_10mms_0g_run1	2	248	4.03614	0.860593
butyl_10mms_0g_run1	2	249	4.04061	0.810027
butyl_10mms_0g_run1	2	250	4.04174	0.79357
butyl_10mms_0g_run1	2	251	4.04288	0.784891
butyl_10mms_0g_run1	2	252	4.04401	0.732992
butyl_10mms_0g_run1	2	253	4.04514	0.760793
butyl_10mms_0g_run1	2	254	4.0496	0.690478
butyl_10mms_0g_run1	2	255	4.05074	0.706641
butyl_10mms_0g_run1	2	256	4.05187	0.726448
butyl_10mms_0g_run1	2	257	4.05301	0.713283
butyl_10mms_0g_run1	2	258	4.05414	0.736754
butyl_10mms_0g_run1	2	259	4.05861	0.714517
butyl_10mms_0g_run1	2	260	4.05974	0.727232
butyl_10mms_0g_run1	2	261	4.06087	0.676725
butyl_10mms_0g_run1	2	262	4.06201	0.726977
butyl_10mms_0g_run1	2	263	4.06314	0.701332
butyl_10mms_0g_run1	2	264	4.06761	0.719493
butyl_10mms_0g_run1	2	265	4.06874	0.688049
butyl_10mms_0g_run1	2	266	4.06987	0.711461
butyl_10mms_0g_run1	2	267	4.07101	0.692124
butyl_10mms_0g_run1	2	268	4.07214	0.673884
butyl_10mms_0g_run1	3	1	4.67063	0.572089
butyl_10mms_0g_run1	3	2	4.67176	0.542995
butyl_10mms_0g_run1	3	3	4.6729	0.593405
butyl_10mms_0g_run1	3	4	4.67403	0.546208
butyl_10mms_0g_run1	3	5	4.67516	0.560334
butyl_10mms_0g_run1	3	6	4.67964	0.551811
butyl_10mms_0g_run1	3	7	4.68077	0.583433
butyl_10mms_0g_run1	3	8	4.6819	0.550636
butyl_10mms_0g_run1	3	9	4.68304	0.567798
butyl_10mms_0g_run1	3	10	4.68417	0.574106
butyl_10mms_0g_run1	3	11	4.68864	0.574772
butyl_10mms_0g_run1	3	12	4.68977	0.551948
butyl_10mms_0g_run1	3	13	4.69091	0.558139
butyl_10mms_0g_run1	3	14	4.69204	0.575184
butyl_10mms_0g_run1	3	15	4.69317	0.510354
butyl_10mms_0g_run1	3	16	4.69764	0.563997
butyl_10mms_0g_run1	3	17	4.69877	0.547324
butyl_10mms_0g_run1	3	18	4.6999	0.585313
butyl_10mms_0g_run1	3	19	4.70104	0.542387
butyl_10mms_0g_run1	3	20	4.70217	0.590838
butyl_10mms_0g_run1	3	21	4.70664	0.544601
butyl_10mms_0g_run1	3	22	4.70777	0.600751
butyl_10mms_0g_run1	3	23	4.70891	0.566054
butyl_10mms_0g_run1	3	24	4.71005	0.586547
butyl_10mms_0g_run1	3	25	4.71118	0.60559
butyl_10mms_0g_run1	3	26	4.7156	0.742537
butyl_10mms_0g_run1	3	27	4.7167	0.71793
butyl_10mms_0g_run1	3	28	4.71781	0.783915
butyl_10mms_0g_run1	3	29	4.71891	0.799177
butyl_10mms_0g_run1	3	30	4.72001	0.808621
butyl_10mms_0g_run1	3	31	4.72463	0.850195
butyl_10mms_0g_run1	3	32	4.72576	0.860911
butyl_10mms_0g_run1	3	33	4.7269	0.824412
butyl_10mms_0g_run1	3	34	4.72803	0.873391
butyl_10mms_0g_run1	3	35	4.72916	0.847608
butyl_10mms_0g_run1	3	36	4.73364	0.898782
butyl_10mms_0g_run1	3	37	4.73477	0.925036
butyl_10mms_0g_run1	3	38	4.73591	0.955638
butyl_10mms_0g_run1	3	39	4.73704	0.921529
butyl_10mms_0g_run1	3	40	4.73818	0.942316
butyl_10mms_0g_run1	3	41	4.74264	0.916631
butyl_10mms_0g_run1	3	42	4.74378	0.916258
butyl_10mms_0g_run1	3	43	4.74491	0.915357
butyl_10mms_0g_run1	3	44	4.74605	0.926564
butyl_10mms_0g_run1	3	45	4.74718	0.911772
butyl_10mms_0g_run1	3	46	4.75164	0.990022
butyl_10mms_0g_run1	3	47	4.75277	0.9421
butyl_10mms_0g_run1	3	48	4.7539	0.932598
butyl_10mms_0g_run1	3	49	4.75504	0.955618
butyl_10mms_0g_run1	3	50	4.75617	0.919942
butyl_10mms_0g_run1	3	51	4.76064	0.903524
butyl_10mms_0g_run1	3	52	4.76178	0.933264
butyl_10mms_0g_run1	3	53	4.76291	0.944745
butyl_10mms_0g_run1	3	54	4.76404	0.905659
butyl_10mms_0g_run1	3	55	4.76518	0.93489
butyl_10mms_0g_run1	3	56	4.76964	0.915102
butyl_10mms_0g_run1	3	57	4.77078	0.945705
butyl_10mms_0g_run1	3	58	4.77191	0.901055
butyl_10mms_0g_run1	3	59	4.77305	0.919413
butyl_10mms_0g_run1	3	60	4.77418	0.920118
butyl_10mms_0g_run1	3	61	4.77864	0.910596
butyl_10mms_0g_run1	3	62	4.77977	0.906364
butyl_10mms_0g_run1	3	63	4.78091	0.895863
butyl_10mms_0g_run1	3	64	4.78205	0.924761
butyl_10mms_0g_run1	3	65	4.78318	0.88497
butyl_10mms_0g_run1	3	66	4.78764	0.917767
butyl_10mms_0g_run1	3	67	4.78877	0.879151
butyl_10mms_0g_run1	3	68	4.7899	0.892572
butyl_10mms_0g_run1	3	69	4.79104	0.899644
butyl_10mms_0g_run1	3	70	4.79217	0.882678
butyl_10mms_0g_run1	3	71	4.79664	0.873058
butyl_10mms_0g_run1	3	72	4.79778	0.893473
butyl_10mms_0g_run1	3	73	4.79891	0.904973
butyl_10mms_0g_run1	3	74	4.80004	0.883657
butyl_10mms_0g_run1	3	75	4.80118	0.904209
butyl_10mms_0g_run1	3	76	4.80564	0.878583
butyl_10mms_0g_run1	3	77	4.80678	0.902799
butyl_10mms_0g_run1	3	78	4.80791	0.872569
butyl_10mms_0g_run1	3	79	4.80904	0.888732
butyl_10mms_0g_run1	3	80	4.81018	0.869943
butyl_10mms_0g_run1	3	81	4.81464	0.899409
butyl_10mms_0g_run1	3	82	4.81577	0.881894
butyl_10mms_0g_run1	3	83	4.81691	0.869179
butyl_10mms_0g_run1	3	84	4.81804	0.906306
butyl_10mms_0g_run1	3	85	4.81918	0.873195
butyl_10mms_0g_run1	3	86	4.82364	0.880875
butyl_10mms_0g_run1	3	87	4.82478	0.861754
butyl_10mms_0g_run1	3	88	4.82591	0.892513
butyl_10mms_0g_run1	3	89	4.82705	0.841378
butyl_10mms_0g_run1	3	90	4.82819	0.889356
butyl_10mms_0g_run1	3	91	4.83264	0.8527
butyl_10mms_0g_run1	3	92	4.83377	0.890395
butyl_10mms_0g_run1	3	93	4.83491	0.909046
butyl_10mms_0g_run1	3	94	4.83604	0.887671
butyl_10mms_0g_run1	3	95	4.83718	0.889768
butyl_10mms_0g_run1	3	96	4.84164	0.89396
butyl_10mms_0g_run1	3	97	4.84278	0.867805
butyl_10mms_0g_run1	3	98	4.84391	0.850133
butyl_10mms_0g_run1	3	99	4.84504	0.900955
butyl_10mms_0g_run1	3	100	4.84618	0.862594
butyl_10mms_0g_run1	3	101	4.85064	0.887358
butyl_10mms_0g_run1	3	102	4.85178	0.884772
butyl_10mms_0g_run1	3	103	4.85291	0.887299
butyl_10mms_0g_run1	3	104	4.85405	0.873879
butyl_10mms_0g_run1	3	105	4.85518	0.868275
butyl_10mms_0g_run1	3	106	4.85961	0.856893
butyl_10mms_0g_run1	3	107	4.86071	0.86373
butyl_10mms_0g_run1	3	108	4.86181	0.867472
butyl_10mms_0g_run1	3	109	4.86292	0.860204
butyl_10mms_0g_run1	3	110	4.86402	0.899132
butyl_10mms_0g_run1	3	111	4.86863	0.86853
butyl_10mms_0g_run1	3	112	4.86976	0.879541
butyl_10mms_0g_run1	3	113	4.8709	0.88244
butyl_10mms_0g_run1	3	114	4.87203	0.859165
butyl_10mms_0g_run1	3	115	4.87317	0.876426
butyl_10mms_0g_run1	3	116	4.87765	0.87333
butyl_10mms_0g_run1	3	117	4.87878	0.848076
butyl_10mms_0g_run1	3	118	4.87991	0.868099
butyl_10mms_0g_run1	3	119	4.88104	0.891884
butyl_10mms_0g_run1	3	120	4.88218	0.850486
butyl_10mms_0g_run1	3	121	4.88665	0.848507
butyl_10mms_0g_run1	3	122	4.88778	0.867805
butyl_10mms_0g_run1	3	123	4.88891	0.876935
butyl_10mms_0g_run1	3	124	4.89005	0.843629
butyl_10mms_0g_run1	3	125	4.89118	0.880187
butyl_10mms_0g_run1	3	126	4.89564	0.840964
butyl_10mms_0g_run1	3	127	4.89678	0.878835
butyl_10mms_0g_run1	3	128	4.89791	0.848703
butyl_10mms_0g_run1	3	129	4.89904	0.863534
butyl_10mms_0g_run1	3	130	4.90018	0.875975
butyl_10mms_0g_run1	3	131	4.90465	0.881872
butyl_10mms_0g_run1	3	132	4.90579	0.839319
butyl_10mms_0g_run1	3	133	4.90692	0.86567
butyl_10mms_0g_run1	3	134	4.90806	0.868334
butyl_10mms_0g_run1	3	135	4.90919	0.835616
butyl_10mms_0g_run1	3	136	4.91364	0.876093
butyl_10mms_0g_run1	3	137	4.91478	0.849467
butyl_10mms_0g_run1	3	138	4.91591	0.876014
butyl_10mms_0g_run1	3	139	4.91705	0.853817
butyl_10mms_0g_run1	3	140	4.91818	0.8911
butyl_10mms_0g_run1	3	141	4.92265	0.841866
butyl_10mms_0g_run1	3	142	4.92378	0.876151
butyl_10mms_0g_run1	3	143	4.92492	0.847097
butyl_10mms_0g_run1	3	144	4.92606	0.867315
butyl_10mms_0g_run1	3	145	4.92719	0.841748
butyl_10mms_0g_run1	3	146	4.93165	0.852837
butyl_10mms_0g_run1	3	147	4.93278	0.877072
butyl_10mms_0g_run1	3	148	4.93391	0.844569
butyl_10mms_0g_run1	3	149	4.93505	0.891315
butyl_10mms_0g_run1	3	150	4.93618	0.875544
butyl_10mms_0g_run1	3	151	4.94065	0.867257
butyl_10mms_0g_run1	3	152	4.94179	0.842218
butyl_10mms_0g_run1	3	153	4.94292	0.864808
butyl_10mms_0g_run1	3	154	4.94406	0.834009
butyl_10mms_0g_run1	3	155	4.94519	0.850506
butyl_10mms_0g_run1	3	156	4.94965	0.857441
butyl_10mms_0g_run1	3	157	4.95078	0.843786
butyl_10mms_0g_run1	3	158	4.95191	0.891942
butyl_10mms_0g_run1	3	159	4.95305	0.850545
butyl_10mms_0g_run1	3	160	4.95418	0.868197
butyl_10mms_0g_run1	3	161	4.95865	0.836125
butyl_10mms_0g_run1	3	162	4.95978	0.860654
butyl_10mms_0g_run1	3	163	4.96092	0.818277
butyl_10mms_0g_run1	3	164	4.96205	0.849957
butyl_10mms_0g_run1	3	165	4.96318	0.861653
butyl_10mms_0g_run1	3	166	4.96765	0.883224
butyl_10mms_0g_run1	3	167	4.96878	0.862359
butyl_10mms_0g_run1	3	168	4.96992	0.852249
butyl_10mms_0g_run1	3	169	4.97106	0.87047
butyl_10mms_0g_run1	3	170	4.97219	0.832972
butyl_10mms_0g_run1	3	171	4.97665	0.821531
butyl_10mms_0g_run1	3	172	4.97779	0.832385
butyl_10mms_0g_run1	3	173	4.97892	0.856306
butyl_10mms_0g_run1	3	174	4.98005	0.836205
butyl_10mms_0g_run1	3	175	4.98119	0.854073
butyl_10mms_0g_run1	3	176	4.98565	0.857678
butyl_10mms_0g_run1	3	177	4.98678	0.846922
butyl_10mms_0g_run1	3	178	4.98792	0.855601
butyl_10mms_0g_run1	3	179	4.98905	0.836695
butyl_10mms_0g_run1	3	180	4.99019	0.860793
butyl_10mms_0g_run1	3	181	4.99465	0.841593
butyl_10mms_0g_run1	3	182	4.99579	0.850997
butyl_10mms_0g_run1	3	183	4.99692	0.842141
butyl_10mms_0g_run1	3	184	4.99806	0.857188
butyl_10mms_0g_run1	3	185	4.9992	0.843963
butyl_10mms_0g_run1	3	186	5.00362	0.87966
butyl_10mms_0g_run1	3	187	5.00472	0.855523
butyl_10mms_0g_run1	3	188	5.00582	0.838047
butyl_10mms_0g_run1	3	189	5.00692	0.862928
butyl_10mms_0g_run1	3	190	5.00803	0.849527
butyl_10mms_0g_run1	3	191	5.01264	0.851957
butyl_10mms_0g_run1	3	192	5.01377	0.850135
butyl_10mms_0g_run1	3	193	5.0149	0.84124
butyl_10mms_0g_run1	3	194	5.01604	0.872626
butyl_10mms_0g_run1	3	195	5.01717	0.826644
butyl_10mms_0g_run1	3	196	5.02165	0.83789
butyl_10mms_0g_run1	3	197	5.02278	0.875467
butyl_10mms_0g_run1	3	198	5.02392	0.845452
butyl_10mms_0g_run1	3	199	5.02505	0.859069
butyl_10mms_0g_run1	3	200	5.02619	0.858971
butyl_10mms_0g_run1	3	201	5.03065	0.867395
butyl_10mms_0g_run1	3	202	5.03178	0.86714
butyl_10mms_0g_run1	3	203	5.03292	0.844531
butyl_10mms_0g_run1	3	204	5.03405	0.867082
butyl_10mms_0g_run1	3	205	5.03519	0.857345
butyl_10mms_0g_run1	3	206	5.03965	0.865945
butyl_10mms_0g_run1	3	207	5.04078	0.836793
butyl_10mms_0g_run1	3	208	5.04192	0.864985
butyl_10mms_0g_run1	3	209	5.04306	0.82494
butyl_10mms_0g_run1	3	210	5.04419	0.843101
butyl_10mms_0g_run1	3	211	5.04866	0.838771
butyl_10mms_0g_run1	3	212	5.04979	0.867689
butyl_10mms_0g_run1	3	213	5.05092	0.854778
butyl_10mms_0g_run1	3	214	5.05206	0.863457
butyl_10mms_0g_run1	3	215	5.05319	0.865299
butyl_10mms_0g_run1	3	216	5.05766	0.848567
butyl_10mms_0g_run1	3	217	5.05879	0.855033
butyl_10mms_0g_run1	3	218	5.05992	0.798393
butyl_10mms_0g_run1	3	219	5.06106	0.842063
butyl_10mms_0g_run1	3	220	5.06219	0.829328
butyl_10mms_0g_run1	3	221	5.06665	0.872097
butyl_10mms_0g_run1	3	222	5.06779	0.843552
butyl_10mms_0g_run1	3	223	5.06892	0.872979
butyl_10mms_0g_run1	3	224	5.07006	0.846412
butyl_10mms_0g_run1	3	225	5.07119	0.838556
butyl_10mms_0g_run1	3	226	5.07565	0.841162
butyl_10mms_0g_run1	3	227	5.07679	0.826331
butyl_10mms_0g_run1	3	228	5.07792	0.84747
butyl_10mms_0g_run1	3	229	5.07906	0.822961
butyl_10mms_0g_run1	3	230	5.08019	0.863085
butyl_10mms_0g_run1	3	231	5.08466	0.839751
butyl_10mms_0g_run1	3	232	5.08579	0.886556
butyl_10mms_0g_run1	3	233	5.08693	0.837909
butyl_10mms_0g_run1	3	234	5.08806	0.8758
butyl_10mms_0g_run1	3	235	5.0892	0.830484
butyl_10mms_0g_run1	3	236	5.09366	0.849116
butyl_10mms_0g_run1	3	237	5.09479	0.826311
butyl_10mms_0g_run1	3	238	5.09593	0.851702
butyl_10mms_0g_run1	3	239	5.09706	0.844414
butyl_10mms_0g_run1	3	240	5.0982	0.835088
butyl_10mms_0g_run1	3	241	5.10265	0.869315
butyl_10mms_0g_run1	3	242	5.10379	0.854739
butyl_10mms_0g_run1	3	243	5.10492	0.85562
butyl_10mms_0g_run1	3	244	5.10606	0.846961
butyl_10mms_0g_run1	3	245	5.10719	0.844845
butyl_10mms_0g_run1	3	246	5.11166	0.799216
butyl_10mms_0g_run1	3	247	5.11279	0.775686
butyl_10mms_0g_run1	3	248	5.11393	0.746514
butyl_10mms_0g_run1	3	249	5.11506	0.742909
butyl_10mms_0g_run1	3	250	5.11619	0.737284
butyl_10mms_0g_run1	3	251	5.12066	0.71779
butyl_10mms_0g_run1	3	252	5.12179	0.712364
butyl_10mms_0g_run1	3	253	5.12292	0.680507
butyl_10mms_0g_run1	3	254	5.12406	0.71877
butyl_10mms_0g_run1	3	255	5.12519	0.704644
butyl_10mms_0g_run1	3	256	5.12966	0.727175
butyl_10mms_0g_run1	3	257	5.13079	0.697552
butyl_10mms_0g_run1	3	258	5.13192	0.71589
butyl_10mms_0g_run1	3	259	5.13306	0.712207
butyl_10mms_0g_run1	3	260	5.13419	0.685856
butyl_10mms_0g_run1	3	261	5.13866	0.672004
butyl_10mms_0g_run1	3	262	5.13979	0.6876
butyl_10mms_0g_run1	3	263	5.14092	0.703626
butyl_10mms_0g_run1	3	264	5.14206	0.668556
butyl_10mms_0g_run1	3	265	5.14319	0.665363
butyl_10mms_0g_run1	3	266	5.14762	0.698277
butyl_10mms_0g_run1	3	267	5.14872	0.690107
butyl_10mms_0g_run1	3	268	5.14983	0.697924
butyl_10mms_0g_run2	1	1	3.29469	0.535
butyl_10mms_0g_run2	1	2	3.29582	0.55081
butyl_10mms_0g_run2	1	3	3.29696	0.539016
butyl_10mms_0g_run2	1	4	3.29809	0.521677
butyl_10mms_0g_run2	1	5	3.30256	0.534157
butyl_10mms_0g_run2	1	6	3.30369	0.53788
butyl_10mms_0g_run2	1	7	3.30482	0.56523
butyl_10mms_0g_run2	1	8	3.30596	0.535059
butyl_10mms_0g_run2	1	9	3.30709	0.574654
butyl_10mms_0g_run2	1	10	3.31155	0.521697
butyl_10mms_0g_run2	1	11	3.31268	0.557295
butyl_10mms_0g_run2	1	12	3.31382	0.543816
butyl_10mms_0g_run2	1	13	3.31495	0.516427
butyl_10mms_0g_run2	1	14	3.31608	0.541387
butyl_10mms_0g_run2	1	15	3.32056	0.56333
butyl_10mms_0g_run2	1	16	3.32169	0.539232
butyl_10mms_0g_run2	1	17	3.32283	0.560704
butyl_10mms_0g_run2	1	18	3.32396	0.569188
butyl_10mms_0g_run2	1	19	3.3251	0.537527
butyl_10mms_0g_run2	1	20	3.32956	0.549263
butyl_10mms_0g_run2	1	21	3.33069	0.523127
butyl_10mms_0g_run2	1	22	3.33182	0.550595
butyl_10mms_0g_run2	1	23	3.33296	0.536822
butyl_10mms_0g_run2	1	24	3.33409	0.560704
butyl_10mms_0g_run2	1	25	3.33856	0.614739
butyl_10mms_0g_run2	1	26	3.33969	0.709877
butyl_10mms_0g_run2	1	27	3.34083	0.692322
butyl_10mms_0g_run2	1	28	3.34196	0.724904
butyl_10mms_0g_run2	1	29	3.34309	0.750745
butyl_10mms_0g_run2	1	30	3.34755	0.812616
butyl_10mms_0g_run2	1	31	3.34869	0.836871
butyl_10mms_0g_run2	1	32	3.34982	0.852662
butyl_10mms_0g_run2	1	33	3.35096	0.856776
butyl_10mms_0g_run2	1	34	3.35209	0.871392
butyl_10mms_0g_run2	1	35	3.35656	0.9305
butyl_10mms_0g_run2	1	36	3.35769	0.925916
butyl_10mms_0g_run2	1	37	3.35883	0.933654
butyl_10mms_0g_run2	1	38	3.35996	0.938454
butyl_10mms_0g_run2	1	39	3.36109	0.929736
butyl_10mms_0g_run2	1	40	3.36556	0.936417
butyl_10mms_0g_run2	1	41	3.36669	0.948544
butyl_10mms_0g_run2	1	42	3.36783	0.959026
butyl_10mms_0g_run2	1	43	3.36896	0.925974
butyl_10mms_0g_run2	1	44	3.37009	0.95546
butyl_10mms_0g_run2	1	45	3.37455	0.918392
butyl_10mms_0g_run2	1	46	3.37569	0.957008
butyl_10mms_0g_run2	1	47	3.37682	0.942079
butyl_10mms_0g_run2	1	48	3.37795	0.937847
butyl_10mms_0g_run2	1	49	3.37908	0.934144
butyl_10mms_0g_run2	1	50	3.38356	0.944822
butyl_10mms_0g_run2	1	51	3.38469	0.935712
butyl_10mms_0g_run2	1	52	3.38583	0.936456
butyl_10mms_0g_run2	1	53	3.38696	0.958399
butyl_10mms_0g_run2	1	54	3.38809	0.924717
butyl_10mms_0g_run2	1	55	3.39256	0.953772
butyl_10mms_0g_run2	1	56	3.39369	0.930889
butyl_10mms_0g_run2	1	57	3.39483	0.963607
butyl_10mms_0g_run2	1	58	3.39596	0.928303
butyl_10mms_0g_run2	1	59	3.39709	0.942762
butyl_10mms_0g_run2	1	60	3.40156	0.92797
butyl_10mms_0g_run2	1	61	3.40269	0.956926
butyl_10mms_0g_run2	1	62	3.40383	0.934415
butyl_10mms_0g_run2	1	63	3.40496	0.938412
butyl_10mms_0g_run2	1	64	3.40609	0.968427
butyl_10mms_0g_run2	1	65	3.41056	0.940038
butyl_10mms_0g_run2	1	66	3.41169	0.93996
butyl_10mms_0g_run2	1	67	3.41283	0.926559
butyl_10mms_0g_run2	1	68	3.41396	0.952264
butyl_10mms_0g_run2	1	69	3.41509	0.910944
butyl_10mms_0g_run2	1	70	3.41953	0.9342
butyl_10mms_0g_run2	1	71	3.42063	0.934729
butyl_10mms_0g_run2	1	72	3.42173	0.937315
butyl_10mms_0g_run2	1	73	3.42283	0.941273
butyl_10mms_0g_run2	1	74	3.42393	0.936649
butyl_10mms_0g_run2	1	75	3.42855	0.939999
butyl_10mms_0g_run2	1	76	3.42968	0.922876
butyl_10mms_0g_run2	1	77	3.43081	0.907967
butyl_10mms_0g_run2	1	78	3.43194	0.926363
butyl_10mms_0g_run2	1	79	3.43308	0.922543
butyl_10mms_0g_run2	1	80	3.43756	0.909201
butyl_10mms_0g_run2	1	81	3.43869	0.945465
butyl_10mms_0g_run2	1	82	3.43983	0.924247
butyl_10mms_0g_run2	1	83	3.44096	0.941645
butyl_10mms_0g_run2	1	84	3.4421	0.945152
butyl_10mms_0g_run2	1	85	3.44656	0.94237
butyl_10mms_0g_run2	1	86	3.4477	0.901795
butyl_10mms_0g_run2	1	87	3.44883	0.909495
butyl_10mms_0g_run2	1	88	3.44997	0.934631
butyl_10mms_0g_run2	1	89	3.4511	0.897602
butyl_10mms_0g_run2	1	90	3.45556	0.931614
butyl_10mms_0g_run2	1	91	3.45669	0.928812
butyl_10mms_0g_run2	1	92	3.45783	0.949815
butyl_10mms_0g_run2	1	93	3.45896	0.92411
butyl_10mms_0g_run2	1	94	3.46009	0.912179
butyl_10mms_0g_run2	1	95	3.46457	0.874994
butyl_10mms_0g_run2	1	96	3.4657	0.931633
butyl_10mms_0g_run2	1	97	3.46684	0.887258
butyl_10mms_0g_run2	1	98	3.46797	0.932985
butyl_10mms_0g_run2	1	99	3.4691	0.931633
butyl_10mms_0g_run2	1	100	3.47356	0.930517
butyl_10mms_0g_run2	1	101	3.47469	0.931888
butyl_10mms_0g_run2	1	102	3.47583	0.914745
butyl_10mms_0g_run2	1	103	3.47696	0.926873
butyl_10mms_0g_run2	1	104	3.4781	0.914726
butyl_10mms_0g_run2	1	105	3.48256	0.917547
butyl_10mms_0g_run2	1	106	3.4837	0.894135
butyl_10mms_0g_run2	1	107	3.48483	0.926206
butyl_10mms_0g_run2	1	108	3.48597	0.902696
butyl_10mms_0g_run2	1	109	3.4871	0.904714
butyl_10mms_0g_run2	1	110	3.49156	0.905831
butyl_10mms_0g_run2	1	111	3.4927	0.911728
butyl_10mms_0g_run2	1	112	3.49383	0.923895
butyl_10mms_0g_run2	1	113	3.49497	0.891509
butyl_10mms_0g_run2	1	114	3.4961	0.929929
butyl_10mms_0g_run2	1	115	3.50057	0.893684
butyl_10mms_0g_run2	1	116	3.5017	0.935865
butyl_10mms_0g_run2	1	117	3.50283	0.890197
butyl_10mms_0g_run2	1	118	3.50397	0.922464
butyl_10mms_0g_run2	1	119	3.5051	0.912747
butyl_10mms_0g_run2	1	120	3.50956	0.938451
butyl_10mms_0g_run2	1	121	3.5107	0.899562
butyl_10mms_0g_run2	1	122	3.51183	0.905478
butyl_10mms_0g_run2	1	123	3.51297	0.929811
butyl_10mms_0g_run2	1	124	3.5141	0.894213
butyl_10mms_0g_run2	1	125	3.51856	0.914745
butyl_10mms_0g_run2	1	126	3.5197	0.896035
butyl_10mms_0g_run2	1	127	3.52083	0.928577
butyl_10mms_0g_run2	1	128	3.52196	0.912492
butyl_10mms_0g_run2	1	129	3.52309	0.919957
butyl_10mms_0g_run2	1	130	3.52757	0.891137
butyl_10mms_0g_run2	1	131	3.5287	0.932397
butyl_10mms_0g_run2	1	132	3.52984	0.893821
butyl_10mms_0g_run2	1	133	3.53097	0.912845
butyl_10mms_0g_run2	1	134	3.5321	0.903597
butyl_10mms_0g_run2	1	135	3.53657	0.927088
butyl_10mms_0g_run2	1	136	3.5377	0.905655
butyl_10mms_0g_run2	1	137	3.53884	0.910827
butyl_10mms_0g_run2	1	138	3.53997	0.937236
butyl_10mms_0g_run2	1	139	3.54111	0.903754
butyl_10mms_0g_run2	1	140	3.54557	0.920172
butyl_10mms_0g_run2	1	141	3.5467	0.894683
butyl_10mms_0g_run2	1	142	3.54783	0.902363
butyl_10mms_0g_run2	1	143	3.54897	0.883516
butyl_10mms_0g_run2	1	144	3.5501	0.890451
butyl_10mms_0g_run2	1	145	3.55456	0.912708
butyl_10mms_0g_run2	1	146	3.5557	0.901481
butyl_10mms_0g_run2	1	147	3.55683	0.944799
butyl_10mms_0g_run2	1	148	3.55797	0.900894
butyl_10mms_0g_run2	1	149	3.5591	0.929968
butyl_10mms_0g_run2	1	150	3.56353	0.898621
butyl_10mms_0g_run2	1	151	3.56463	0.867451
butyl_10mms_0g_run2	1	152	3.56574	0.916293
butyl_10mms_0g_run2	1	153	3.56684	0.873054
butyl_10mms_0g_run2	1	154	3.56794	0.911356
butyl_10mms_0g_run2	1	155	3.57255	0.896211
butyl_10mms_0g_run2	1	156	3.57369	0.942526
butyl_10mms_0g_run2	1	157	3.57482	0.880401
butyl_10mms_0g_run2	1	158	3.57595	0.906517
butyl_10mms_0g_run2	1	159	3.57709	0.919937
butyl_10mms_0g_run2	1	160	3.58157	0.888864
butyl_10mms_0g_run2	1	161	3.5827	0.882282
butyl_10mms_0g_run2	1	162	3.58384	0.914118
butyl_10mms_0g_run2	1	163	3.58497	0.883046
butyl_10mms_0g_run2	1	164	3.5861	0.926089
butyl_10mms_0g_run2	1	165	3.59056	0.91355
butyl_10mms_0g_run2	1	166	3.5917	0.916058
butyl_10mms_0g_run2	1	167	3.59283	0.916293
butyl_10mms_0g_run2	1	168	3.59397	0.901854
butyl_10mms_0g_run2	1	169	3.5951	0.914745
butyl_10mms_0g_run2	1	170	3.59956	0.881909
butyl_10mms_0g_run2	1	171	3.6007	0.90969
butyl_10mms_0g_run2	1	172	3.60184	0.897877
butyl_10mms_0g_run2	1	173	3.60297	0.917077
butyl_10mms_0g_run2	1	174	3.6041	0.902716
butyl_10mms_0g_run2	1	175	3.60857	0.924149
butyl_10mms_0g_run2	1	176	3.60971	0.897837
butyl_10mms_0g_run2	1	177	3.61084	0.907496
butyl_10mms_0g_run2	1	178	3.61197	0.898151
butyl_10mms_0g_run2	1	179	3.61311	0.900247
butyl_10mms_0g_run2	1	180	3.61757	0.898993
butyl_10mms_0g_run2	1	181	3.6187	0.890353
butyl_10mms_0g_run2	1	182	3.61983	0.925658
butyl_10mms_0g_run2	1	183	3.62097	0.87995
butyl_10mms_0g_run2	1	184	3.6221	0.925246
butyl_10mms_0g_run2	1	185	3.62657	0.889139
butyl_10mms_0g_run2	1	186	3.6277	0.919173
butyl_10mms_0g_run2	1	187	3.62884	0.88283
butyl_10mms_0g_run2	1	188	3.62997	0.914432
butyl_10mms_0g_run2	1	189	3.6311	0.900247
butyl_10mms_0g_run2	1	190	3.63557	0.925188
butyl_10mms_0g_run2	1	191	3.6367	0.890569
butyl_10mms_0g_run2	1	192	3.63784	0.910219
butyl_10mms_0g_run2	1	193	3.63897	0.913001
butyl_10mms_0g_run2	1	194	3.6401	0.90058
butyl_10mms_0g_run2	1	195	3.64457	0.894644
butyl_10mms_0g_run2	1	196	3.64571	0.898406
butyl_10mms_0g_run2	1	197	3.64684	0.915313
butyl_10mms_0g_run2	1	198	3.64797	0.850425
butyl_10mms_0g_run2	1	199	3.64911	0.898229
butyl_10mms_0g_run2	1	200	3.65357	0.890295
butyl_10mms_0g_run2	1	201	3.65471	0.921348
butyl_10mms_0g_run2	1	202	3.65584	0.878618
butyl_10mms_0g_run2	1	203	3.65698	0.929576
butyl_10mms_0g_run2	1	204	3.65811	0.899424
butyl_10mms_0g_run2	1	205	3.66257	0.897367
butyl_10mms_0g_run2	1	206	3.6637	0.916175
butyl_10mms_0g_run2	1	207	3.66483	0.858536
butyl_10mms_0g_run2	1	208	3.66597	0.89917
butyl_10mms_0g_run2	1	209	3.6671	0.893566
butyl_10mms_0g_run2	1	210	3.67157	0.906379
butyl_10mms_0g_run2	1	211	3.67271	0.895545
butyl_10mms_0g_run2	1	212	3.67384	0.934592
butyl_10mms_0g_run2	1	213	3.67498	0.878422
butyl_10mms_0g_run2	1	214	3.67611	0.90544
butyl_10mms_0g_run2	1	215	3.68057	0.884438
butyl_10mms_0g_run2	1	216	3.68171	0.887318
butyl_10mms_0g_run2	1	217	3.68284	0.898367
butyl_10mms_0g_run2	1	218	3.68397	0.871154
butyl_10mms_0g_run2	1	219	3.68511	0.915197
butyl_10mms_0g_run2	1	220	3.68957	0.903187
butyl_10mms_0g_run2	1	221	3.69071	0.937629
butyl_10mms_0g_run2	1	222	3.69184	0.889806
butyl_10mms_0g_run2	1	223	3.69297	0.907811
butyl_10mms_0g_run2	1	224	3.6941	0.905224
butyl_10mms_0g_run2	1	225	3.69857	0.908927
butyl_10mms_0g_run2	1	226	3.69971	0.88238
butyl_10mms_0g_run2	1	227	3.70084	0.897799
butyl_10mms_0g_run2	1	228	3.70197	0.913551
butyl_10mms_0g_run2	1	229	3.70311	0.87905
butyl_10mms_0g_run2	1	230	3.70754	0.898289
butyl_10mms_0g_run2	1	231	3.70864	0.926579
butyl_10mms_0g_run2	1	232	3.70974	0.88816
butyl_10mms_0g_run2	1	233	3.71085	0.902952
butyl_10mms_0g_run2	1	234	3.71195	0.880598
butyl_10mms_0g_run2	1	235	3.71656	0.919605
butyl_10mms_0g_run2	1	236	3.7177	0.876327
butyl_10mms_0g_run2	1	237	3.71883	0.920134
butyl_10mms_0g_run2	1	238	3.71997	0.875817
butyl_10mms_0g_run2	1	239	3.7211	0.915941
butyl_10mms_0g_run2	1	240	3.72557	0.916784
butyl_10mms_0g_run2	1	241	3.72671	0.888395
butyl_10mms_0g_run2	1	242	3.72784	0.88673
butyl_10mms_0g_run2	1	243	3.72898	0.907673
butyl_10mms_0g_run2	1	244	3.73011	0.893097
butyl_10mms_0g_run2	1	245	3.73457	0.889218
butyl_10mms_0g_run2	1	246	3.7357	0.856127
butyl_10mms_0g_run2	1	247	3.73684	0.866962
butyl_10mms_0g_run2	1	248	3.73798	0.844568
butyl_10mms_0g_run2	1	249	3.73911	0.809225
butyl_10mms_0g_run2	1	250	3.74357	0.7586
butyl_10mms_0g_run2	1	251	3.74471	0.756111
butyl_10mms_0g_run2	1	252	3.74584	0.763184
butyl_10mms_0g_run2	1	253	3.74697	0.723824
butyl_10mms_0g_run2	1	254	3.74811	0.733267
butyl_10mms_0g_run2	1	255	3.75258	0.747256
butyl_10mms_0g_run2	1	256	3.75371	0.777604
butyl_10mms_0g_run2	1	257	3.75484	0.73889
butyl_10mms_0g_run2	1	258	3.75598	0.77968
butyl_10mms_0g_run2	1	259	3.75711	0.766985
butyl_10mms_0g_run2	1	260	3.76158	0.763576
butyl_10mms_0g_run2	1	261	3.76271	0.716183
butyl_10mms_0g_run2	1	262	3.76385	0.742221
butyl_10mms_0g_run2	1	263	3.76498	0.718456
butyl_10mms_0g_run2	1	264	3.76611	0.700784
butyl_10mms_0g_run2	1	265	3.77058	0.725019
butyl_10mms_0g_run2	1	266	3.77171	0.731994
butyl_10mms_0g_run2	1	267	3.77284	0.753506
butyl_10mms_0g_run2	1	268	3.77398	0.734364
butyl_10mms_0g_run2	2	1	4.63916	0.551612
butyl_10mms_0g_run2	2	2	4.64362	0.568226
butyl_10mms_0g_run2	2	3	4.64475	0.546067
butyl_10mms_0g_run2	2	4	4.64588	0.588248
butyl_10mms_0g_run2	2	5	4.64702	0.545048
butyl_10mms_0g_run2	2	6	4.64815	0.575043
butyl_10mms_0g_run2	2	7	4.65262	0.550358
butyl_10mms_0g_run2	2	8	4.65376	0.590972
butyl_10mms_0g_run2	2	9	4.65489	0.544911
butyl_10mms_0g_run2	2	10	4.65603	0.582175
butyl_10mms_0g_run2	2	11	4.65716	0.581548
butyl_10mms_0g_run2	2	12	4.66162	0.585349
butyl_10mms_0g_run2	2	13	4.66276	0.554707
butyl_10mms_0g_run2	2	14	4.66389	0.561701
butyl_10mms_0g_run2	2	15	4.66502	0.536644
butyl_10mms_0g_run2	2	16	4.66615	0.536506
butyl_10mms_0g_run2	2	17	4.67062	0.577786
butyl_10mms_0g_run2	2	18	4.67175	0.556118
butyl_10mms_0g_run2	2	19	4.67288	0.573339
butyl_10mms_0g_run2	2	20	4.67402	0.589561
butyl_10mms_0g_run2	2	21	4.67515	0.543011
butyl_10mms_0g_run2	2	22	4.67962	0.610446
butyl_10mms_0g_run2	2	23	4.68076	0.667086
butyl_10mms_0g_run2	2	24	4.68189	0.677802
butyl_10mms_0g_run2	2	25	4.68302	0.681505
butyl_10mms_0g_run2	2	26	4.68416	0.747392
butyl_10mms_0g_run2	2	27	4.68862	0.813573
butyl_10mms_0g_run2	2	28	4.68975	0.862827
butyl_10mms_0g_run2	2	29	4.69088	0.849269
butyl_10mms_0g_run2	2	30	4.69202	0.861514
butyl_10mms_0g_run2	2	31	4.69315	0.880655
butyl_10mms_0g_run2	2	32	4.69762	0.913452
butyl_10mms_0g_run2	2	33	4.69875	0.881047
butyl_10mms_0g_run2	2	34	4.69989	0.919427
butyl_10mms_0g_run2	2	35	4.70102	0.934866
butyl_10mms_0g_run2	2	36	4.70216	0.921896
butyl_10mms_0g_run2	2	37	4.70662	0.988469
butyl_10mms_0g_run2	2	38	4.70775	0.960315
butyl_10mms_0g_run2	2	39	4.70888	0.987332
butyl_10mms_0g_run2	2	40	4.71002	0.950088
butyl_10mms_0g_run2	2	41	4.71115	0.947306
butyl_10mms_0g_run2	2	42	4.71559	0.935453
butyl_10mms_0g_run2	2	43	4.71669	0.964234
butyl_10mms_0g_run2	2	44	4.71779	0.968838
butyl_10mms_0g_run2	2	45	4.71889	0.948443
butyl_10mms_0g_run2	2	46	4.72	1.00187
butyl_10mms_0g_run2	2	47	4.72461	0.964919
butyl_10mms_0g_run2	2	48	4.72574	0.99415
butyl_10mms_0g_run2	2	49	4.72688	0.962549
butyl_10mms_0g_run2	2	50	4.72801	0.968093
butyl_10mms_0g_run2	2	51	4.72914	0.977948
butyl_10mms_0g_run2	2	52	4.73362	0.971796
butyl_10mms_0g_run2	2	53	4.73476	0.949599
butyl_10mms_0g_run2	2	54	4.73589	0.980985
butyl_10mms_0g_run2	2	55	4.73703	0.939705
butyl_10mms_0g_run2	2	56	4.73816	0.963705
butyl_10mms_0g_run2	2	57	4.74262	0.94519
butyl_10mms_0g_run2	2	58	4.74376	0.963763
butyl_10mms_0g_run2	2	59	4.74489	0.95818
butyl_10mms_0g_run2	2	60	4.74602	0.929184
butyl_10mms_0g_run2	2	61	4.74715	0.961393
butyl_10mms_0g_run2	2	62	4.75162	0.931202
butyl_10mms_0g_run2	2	63	4.75276	0.961687
butyl_10mms_0g_run2	2	64	4.75389	0.924129
butyl_10mms_0g_run2	2	65	4.75503	0.948031
butyl_10mms_0g_run2	2	66	4.75616	0.948501
butyl_10mms_0g_run2	2	67	4.76063	0.941586
butyl_10mms_0g_run2	2	68	4.76176	0.9169
butyl_10mms_0g_run2	2	69	4.7629	0.94664
butyl_10mms_0g_run2	2	70	4.76404	0.920191
butyl_10mms_0g_run2	2	71	4.76517	0.90828
butyl_10mms_0g_run2	2	72	4.76963	0.918781
butyl_10mms_0g_run2	2	73	4.77076	0.929478
butyl_10mms_0g_run2	2	74	4.77189	0.954771
butyl_10mms_0g_run2	2	75	4.77303	0.906438
butyl_10mms_0g_run2	2	76	4.77416	0.967917
butyl_10mms_0g_run2	2	77	4.77862	0.912022
butyl_10mms_0g_run2	2	78	4.77976	0.958728
butyl_10mms_0g_run2	2	79	4.78089	0.909827
butyl_10mms_0g_run2	2	80	4.78203	0.92072
butyl_10mms_0g_run2	2	81	4.78316	0.923267
butyl_10mms_0g_run2	2	82	4.78762	0.946327
butyl_10mms_0g_run2	2	83	4.78876	0.921386
butyl_10mms_0g_run2	2	84	4.78989	0.93514
butyl_10mms_0g_run2	2	85	4.79103	0.959923
butyl_10mms_0g_run2	2	86	4.79216	0.924893
butyl_10mms_0g_run2	2	87	4.79663	0.919917
butyl_10mms_0g_run2	2	88	4.79776	0.905243
butyl_10mms_0g_run2	2	89	4.79889	0.920015
butyl_10mms_0g_run2	2	90	4.80003	0.913217
butyl_10mms_0g_run2	2	91	4.80116	0.903636
butyl_10mms_0g_run2	2	92	4.80562	0.909338
butyl_10mms_0g_run2	2	93	4.80676	0.953458
butyl_10mms_0g_run2	2	94	4.80789	0.956514
butyl_10mms_0g_run2	2	95	4.80903	0.910298
butyl_10mms_0g_run2	2	96	4.81016	0.933631
butyl_10mms_0g_run2	2	97	4.81462	0.894565
butyl_10mms_0g_run2	2	98	4.81576	0.920818
butyl_10mms_0g_run2	2	99	4.81689	0.901227
butyl_10mms_0g_run2	2	100	4.81803	0.91882
butyl_10mms_0g_run2	2	101	4.81916	0.912551
butyl_10mms_0g_run2	2	102	4.82363	0.9553
butyl_10mms_0g_run2	2	103	4.82476	0.912041
butyl_10mms_0g_run2	2	104	4.8259	0.932025
butyl_10mms_0g_run2	2	105	4.82703	0.904224
butyl_10mms_0g_run2	2	106	4.82817	0.910064
butyl_10mms_0g_run2	2	107	4.83263	0.882812
butyl_10mms_0g_run2	2	108	4.83376	0.899485
butyl_10mms_0g_run2	2	109	4.83489	0.924582
butyl_10mms_0g_run2	2	110	4.83603	0.892491
butyl_10mms_0g_run2	2	111	4.83717	0.924817
butyl_10mms_0g_run2	2	112	4.84163	0.90358
butyl_10mms_0g_run2	2	113	4.84276	0.931322
butyl_10mms_0g_run2	2	114	4.8439	0.888259
butyl_10mms_0g_run2	2	115	4.84503	0.912553
butyl_10mms_0g_run2	2	116	4.84616	0.916628
butyl_10mms_0g_run2	2	117	4.85062	0.907322
butyl_10mms_0g_run2	2	118	4.85176	0.89974
butyl_10mms_0g_run2	2	119	4.85289	0.90979
butyl_10mms_0g_run2	2	120	4.85403	0.915883
butyl_10mms_0g_run2	2	121	4.85516	0.891354
butyl_10mms_0g_run2	2	122	4.85959	0.901307
butyl_10mms_0g_run2	2	123	4.8607	0.914277
butyl_10mms_0g_run2	2	124	4.8618	0.887318
butyl_10mms_0g_run2	2	125	4.86291	0.912337
butyl_10mms_0g_run2	2	126	4.86401	0.912239
butyl_10mms_0g_run2	2	127	4.86862	0.909692
butyl_10mms_0g_run2	2	128	4.86975	0.879638
butyl_10mms_0g_run2	2	129	4.87088	0.920487
butyl_10mms_0g_run2	2	130	4.87202	0.901464
butyl_10mms_0g_run2	2	131	4.87315	0.906675
butyl_10mms_0g_run2	2	132	4.87763	0.894293
butyl_10mms_0g_run2	2	133	4.87876	0.916138
butyl_10mms_0g_run2	2	134	4.8799	0.892491
butyl_10mms_0g_run2	2	135	4.88103	0.909496
butyl_10mms_0g_run2	2	136	4.88216	0.883028
butyl_10mms_0g_run2	2	137	4.88663	0.92035
butyl_10mms_0g_run2	2	138	4.88777	0.891374
butyl_10mms_0g_run2	2	139	4.8889	0.912474
butyl_10mms_0g_run2	2	140	4.89003	0.930988
butyl_10mms_0g_run2	2	141	4.89117	0.904775
butyl_10mms_0g_run2	2	142	4.89563	0.898113
butyl_10mms_0g_run2	2	143	4.89676	0.887495
butyl_10mms_0g_run2	2	144	4.89789	0.907694
butyl_10mms_0g_run2	2	145	4.89902	0.878953
butyl_10mms_0g_run2	2	146	4.90016	0.901757
butyl_10mms_0g_run2	2	147	4.90463	0.892882
butyl_10mms_0g_run2	2	148	4.90577	0.919762
butyl_10mms_0g_run2	2	149	4.9069	0.898819
butyl_10mms_0g_run2	2	150	4.90803	0.935122
butyl_10mms_0g_run2	2	151	4.90917	0.900073
butyl_10mms_0g_run2	2	152	4.91363	0.917
butyl_10mms_0g_run2	2	153	4.91477	0.872703
butyl_10mms_0g_run2	2	154	4.9159	0.887083
butyl_10mms_0g_run2	2	155	4.91704	0.900523
butyl_10mms_0g_run2	2	156	4.91817	0.878541
butyl_10mms_0g_run2	2	157	4.92263	0.893215
butyl_10mms_0g_run2	2	158	4.92377	0.909261
butyl_10mms_0g_run2	2	159	4.9249	0.915413
butyl_10mms_0g_run2	2	160	4.92603	0.890943
butyl_10mms_0g_run2	2	161	4.92717	0.903736
butyl_10mms_0g_run2	2	162	4.93163	0.875759
butyl_10mms_0g_run2	2	163	4.93277	0.885222
butyl_10mms_0g_run2	2	164	4.9339	0.88438
butyl_10mms_0g_run2	2	165	4.93504	0.888827
butyl_10mms_0g_run2	2	166	4.93617	0.921428
butyl_10mms_0g_run2	2	167	4.94064	0.922446
butyl_10mms_0g_run2	2	168	4.94177	0.894724
butyl_10mms_0g_run2	2	169	4.94291	0.911612
butyl_10mms_0g_run2	2	170	4.94404	0.903971
butyl_10mms_0g_run2	2	171	4.94518	0.88052
butyl_10mms_0g_run2	2	172	4.94963	0.89251
butyl_10mms_0g_run2	2	173	4.95077	0.882205
butyl_10mms_0g_run2	2	174	4.9519	0.914688
butyl_10mms_0g_run2	2	175	4.95304	0.894332
butyl_10mms_0g_run2	2	176	4.95417	0.888494
butyl_10mms_0g_run2	2	177	4.95863	0.879795
butyl_10mms_0g_run2	2	178	4.95976	0.902541
butyl_10mms_0g_run2	2	179	4.9609	0.90836
butyl_10mms_0g_run2	2	180	4.96203	0.879109
butyl_10mms_0g_run2	2	181	4.96317	0.917666
butyl_10mms_0g_run2	2	182	4.96763	0.884634
butyl_10mms_0g_run2	2	183	4.96877	0.915237
butyl_10mms_0g_run2	2	184	4.9699	0.878835
butyl_10mms_0g_run2	2	185	4.97104	0.910613
butyl_10mms_0g_run2	2	186	4.97217	0.903659
butyl_10mms_0g_run2	2	187	4.97664	0.925484
butyl_10mms_0g_run2	2	188	4.97777	0.871195
butyl_10mms_0g_run2	2	189	4.97891	0.910829
butyl_10mms_0g_run2	2	190	4.98004	0.902366
butyl_10mms_0g_run2	2	191	4.98118	0.881089
butyl_10mms_0g_run2	2	192	4.98564	0.888357
butyl_10mms_0g_run2	2	193	4.98677	0.891904
butyl_10mms_0g_run2	2	194	4.9879	0.914199
butyl_10mms_0g_run2	2	195	4.98904	0.883734
butyl_10mms_0g_run2	2	196	4.99017	0.936984
butyl_10mms_0g_run2	2	197	4.99464	0.880932
butyl_10mms_0g_run2	2	198	4.99577	0.911868
butyl_10mms_0g_run2	2	199	4.99691	0.874663
butyl_10mms_0g_run2	2	200	4.99804	0.900152
butyl_10mms_0g_run2	2	201	4.99918	0.879012
butyl_10mms_0g_run2	2	202	5.0036	0.908948
butyl_10mms_0g_run2	2	203	5.0047	0.872292
butyl_10mms_0g_run2	2	204	5.00581	0.913102
butyl_10mms_0g_run2	2	205	5.00691	0.907322
butyl_10mms_0g_run2	2	206	5.00801	0.904482
butyl_10mms_0g_run2	2	207	5.01262	0.892472
butyl_10mms_0g_run2	2	208	5.01376	0.889768
butyl_10mms_0g_run2	2	209	5.01489	0.880638
butyl_10mms_0g_run2	2	210	5.01603	0.893569
butyl_10mms_0g_run2	2	211	5.01716	0.87143
butyl_10mms_0g_run2	2	212	5.02164	0.875877
butyl_10mms_0g_run2	2	213	5.02277	0.901347
butyl_10mms_0g_run2	2	214	5.02391	0.926503
butyl_10mms_0g_run2	2	215	5.02504	0.89063
butyl_10mms_0g_run2	2	216	5.02618	0.92135
butyl_10mms_0g_run2	2	217	5.03064	0.885615
butyl_10mms_0g_run2	2	218	5.03177	0.882597
butyl_10mms_0g_run2	2	219	5.03291	0.851094
butyl_10mms_0g_run2	2	220	5.03404	0.907244
butyl_10mms_0g_run2	2	221	5.03518	0.875074
butyl_10mms_0g_run2	2	222	5.03963	0.912906
butyl_10mms_0g_run2	2	223	5.04077	0.909046
butyl_10mms_0g_run2	2	224	5.0419	0.871763
butyl_10mms_0g_run2	2	225	5.04303	0.909497
butyl_10mms_0g_run2	2	226	5.04417	0.88391
butyl_10mms_0g_run2	2	227	5.04864	0.854973
butyl_10mms_0g_run2	2	228	5.04978	0.881853
butyl_10mms_0g_run2	2	229	5.05091	0.889807
butyl_10mms_0g_run2	2	230	5.05205	0.876132
butyl_10mms_0g_run2	2	231	5.05318	0.922878
butyl_10mms_0g_run2	2	232	5.05763	0.893843
butyl_10mms_0g_run2	2	233	5.05877	0.890767
butyl_10mms_0g_run2	2	234	5.0599	0.908204
butyl_10mms_0g_run2	2	235	5.06103	0.858931
butyl_10mms_0g_run2	2	236	5.06217	0.913082
butyl_10mms_0g_run2	2	237	5.06664	0.883048
butyl_10mms_0g_run2	2	238	5.06777	0.90454
butyl_10mms_0g_run2	2	239	5.0689	0.867061
butyl_10mms_0g_run2	2	240	5.07004	0.912534
butyl_10mms_0g_run2	2	241	5.07118	0.880619
butyl_10mms_0g_run2	2	242	5.07564	0.911985
butyl_10mms_0g_run2	2	243	5.07677	0.847156
butyl_10mms_0g_run2	2	244	5.07791	0.87335
butyl_10mms_0g_run2	2	245	5.07904	0.84312
butyl_10mms_0g_run2	2	246	5.08018	0.823019
butyl_10mms_0g_run2	2	247	5.08464	0.740322
butyl_10mms_0g_run2	2	248	5.08578	0.765576
butyl_10mms_0g_run2	2	249	5.08691	0.752958
butyl_10mms_0g_run2	2	250	5.08804	0.721318
butyl_10mms_0g_run2	2	251	5.08918	0.761618
butyl_10mms_0g_run2	2	252	5.09364	0.743574
butyl_10mms_0g_run2	2	253	5.09477	0.773882
butyl_10mms_0g_run2	2	254	5.09591	0.734699
butyl_10mms_0g_run2	2	255	5.09704	0.774921
butyl_10mms_0g_run2	2	256	5.09818	0.737461
butyl_10mms_0g_run2	2	257	5.10264	0.754075
butyl_10mms_0g_run2	2	258	5.10377	0.732877
butyl_10mms_0g_run2	2	259	5.1049	0.725883
butyl_10mms_0g_run2	2	260	5.10604	0.740302
butyl_10mms_0g_run2	2	261	5.10718	0.733484
butyl_10mms_0g_run2	2	262	5.11164	0.715793
butyl_10mms_0g_run2	2	263	5.11278	0.731486
butyl_10mms_0g_run2	2	264	5.11391	0.733406
butyl_10mms_0g_run2	2	265	5.11505	0.700217
butyl_10mms_0g_run2	2	266	5.11618	0.734151
butyl_10mms_0g_run2	2	267	5.12064	0.721161
butyl_10mms_0g_run2	2	268	5.12178	0.735287
butyl_10mms_0g_run2	3	1	5.84407	0.589931
butyl_10mms_0g_run2	3	2	5.84521	0.594712
butyl_10mms_0g_run2	3	3	5.84968	0.593516
butyl_10mms_0g_run2	3	4	5.85081	0.562816
butyl_10mms_0g_run2	3	5	5.85194	0.580625
butyl_10mms_0g_run2	3	6	5.85308	0.599845
butyl_10mms_0g_run2	3	7	5.85422	0.567753
butyl_10mms_0g_run2	3	8	5.85868	0.594809
butyl_10mms_0g_run2	3	9	5.85981	0.582976
butyl_10mms_0g_run2	3	10	5.86095	0.600981
butyl_10mms_0g_run2	3	11	5.86208	0.56264
butyl_10mms_0g_run2	3	12	5.86321	0.602078
butyl_10mms_0g_run2	3	13	5.86764	0.560837
butyl_10mms_0g_run2	3	14	5.86875	0.589559
butyl_10mms_0g_run2	3	15	5.86985	0.597356
butyl_10mms_0g_run2	3	16	5.87095	0.569242
butyl_10mms_0g_run2	3	17	5.87205	0.606917
butyl_10mms_0g_run2	3	18	5.87666	0.567361
butyl_10mms_0g_run2	3	19	5.8778	0.589128
butyl_10mms_0g_run2	3	20	5.87893	0.585425
butyl_10mms_0g_run2	3	21	5.88007	0.574983
butyl_10mms_0g_run2	3	22	5.8812	0.596377
butyl_10mms_0g_run2	3	23	5.88568	0.602352
butyl_10mms_0g_run2	3	24	5.88681	0.597533
butyl_10mms_0g_run2	3	25	5.88794	0.61303
butyl_10mms_0g_run2	3	26	5.88908	0.639341
butyl_10mms_0g_run2	3	27	5.89021	0.628115
butyl_10mms_0g_run2	3	28	5.89468	0.745333
butyl_10mms_0g_run2	3	29	5.89581	0.774661
butyl_10mms_0g_run2	3	30	5.89695	0.812121
butyl_10mms_0g_run2	3	31	5.89808	0.81937
butyl_10mms_0g_run2	3	32	5.89922	0.84284
butyl_10mms_0g_run2	3	33	5.90367	0.865626
butyl_10mms_0g_run2	3	34	5.90481	0.913449
butyl_10mms_0g_run2	3	35	5.90594	0.890468
butyl_10mms_0g_run2	3	36	5.90708	0.941857
butyl_10mms_0g_run2	3	37	5.90821	0.931375
butyl_10mms_0g_run2	3	38	5.91268	0.972439
butyl_10mms_0g_run2	3	39	5.91381	0.94648
butyl_10mms_0g_run2	3	40	5.91495	0.970813
butyl_10mms_0g_run2	3	41	5.91608	0.956511
butyl_10mms_0g_run2	3	42	5.91722	0.971048
butyl_10mms_0g_run2	3	43	5.92168	0.961115
butyl_10mms_0g_run2	3	44	5.92282	0.967875
butyl_10mms_0g_run2	3	45	5.92395	1.00273
butyl_10mms_0g_run2	3	46	5.92508	0.96809
butyl_10mms_0g_run2	3	47	5.92621	0.984057
butyl_10mms_0g_run2	3	48	5.93068	0.966699
butyl_10mms_0g_run2	3	49	5.93182	0.98778
butyl_10mms_0g_run2	3	50	5.93295	0.954023
butyl_10mms_0g_run2	3	51	5.93408	0.979159
butyl_10mms_0g_run2	3	52	5.93521	0.982627
butyl_10mms_0g_run2	3	53	5.93968	0.969187
butyl_10mms_0g_run2	3	54	5.94081	1.00059
butyl_10mms_0g_run2	3	55	5.94194	0.962467
butyl_10mms_0g_run2	3	56	5.94308	0.970892
butyl_10mms_0g_run2	3	57	5.94421	0.960978
butyl_10mms_0g_run2	3	58	5.94868	0.934255
butyl_10mms_0g_run2	3	59	5.94982	0.924851
butyl_10mms_0g_run2	3	60	5.95095	0.949556
butyl_10mms_0g_run2	3	61	5.95208	0.940172
butyl_10mms_0g_run2	3	62	5.95322	0.945795
butyl_10mms_0g_run2	3	63	5.95768	0.95224
butyl_10mms_0g_run2	3	64	5.95881	0.932179
butyl_10mms_0g_run2	3	65	5.95994	0.964799
butyl_10mms_0g_run2	3	66	5.96108	0.917896
butyl_10mms_0g_run2	3	67	5.96221	0.956649
butyl_10mms_0g_run2	3	68	5.96668	0.906318
butyl_10mms_0g_run2	3	69	5.96781	0.94364
butyl_10mms_0g_run2	3	70	5.96895	0.915369
butyl_10mms_0g_run2	3	71	5.97008	0.943601
butyl_10mms_0g_run2	3	72	5.97122	0.94074
butyl_10mms_0g_run2	3	73	5.97568	0.941465
butyl_10mms_0g_run2	3	74	5.97682	0.920619
butyl_10mms_0g_run2	3	75	5.97795	0.936939
butyl_10mms_0g_run2	3	76	5.97909	0.935039
butyl_10mms_0g_run2	3	77	5.98022	0.918565
butyl_10mms_0g_run2	3	78	5.98468	0.923776
butyl_10mms_0g_run2	3	79	5.98581	0.920152
butyl_10mms_0g_run2	3	80	5.98695	0.944093
butyl_10mms_0g_run2	3	81	5.98808	0.916175
butyl_10mms_0g_run2	3	82	5.98922	0.937177
butyl_10mms_0g_run2	3	83	5.99368	0.91351
butyl_10mms_0g_run2	3	84	5.99482	0.941468
butyl_10mms_0g_run2	3	85	5.99595	0.904263
butyl_10mms_0g_run2	3	86	5.99709	0.934415
butyl_10mms_0g_run2	3	87	5.99822	0.92889
butyl_10mms_0g_run2	3	88	6.00268	0.922738
butyl_10mms_0g_run2	3	89	6.00381	0.934963
butyl_10mms_0g_run2	3	90	6.00495	0.902245
butyl_10mms_0g_run2	3	91	6.00608	0.929223
butyl_10mms_0g_run2	3	92	6.00721	0.952615
butyl_10mms_0g_run2	3	93	6.01165	0.923561
butyl_10mms_0g_run2	3	94	6.01275	0.924207
butyl_10mms_0g_run2	3	95	6.01385	0.901207
butyl_10mms_0g_run2	3	96	6.01496	0.922718
butyl_10mms_0g_run2	3	97	6.01606	0.877305
butyl_10mms_0g_run2	3	98	6.02067	0.928204
butyl_10mms_0g_run2	3	99	6.0218	0.904929
butyl_10mms_0g_run2	3	100	6.02294	0.920661
butyl_10mms_0g_run2	3	101	6.02407	0.922052
butyl_10mms_0g_run2	3	102	6.02521	0.93126
butyl_10mms_0g_run2	3	103	6.02968	0.901971
butyl_10mms_0g_run2	3	104	6.03082	0.924031
butyl_10mms_0g_run2	3	105	6.03195	0.879342
butyl_10mms_0g_run2	3	106	6.03309	0.912393
butyl_10mms_0g_run2	3	107	6.03422	0.901873
butyl_10mms_0g_run2	3	108	6.03868	0.934571
butyl_10mms_0g_run2	3	109	6.03981	0.898131
butyl_10mms_0g_run2	3	110	6.04095	0.925383
butyl_10mms_0g_run2	3	111	6.04208	0.937549
butyl_10mms_0g_run2	3	112	6.04322	0.900345
butyl_10mms_0g_run2	3	113	6.04768	0.898581
butyl_10mms_0g_run2	3	114	6.04881	0.853599
butyl_10mms_0g_run2	3	115	6.04995	0.902852
butyl_10mms_0g_run2	3	116	6.05108	0.898699
butyl_10mms_0g_run2	3	117	6.05221	0.889216
butyl_10mms_0g_run2	3	118	6.05669	0.90344
butyl_10mms_0g_run2	3	119	6.05782	0.945131
butyl_10mms_0g_run2	3	120	6.05896	0.878441
butyl_10mms_0g_run2	3	121	6.06009	0.918545
butyl_10mms_0g_run2	3	122	6.06122	0.907045
butyl_10mms_0g_run2	3	123	6.06569	0.898503
butyl_10mms_0g_run2	3	124	6.06682	0.89578
butyl_10mms_0g_run2	3	125	6.06795	0.8852
butyl_10mms_0g_run2	3	126	6.06909	0.91494
butyl_10mms_0g_run2	3	127	6.07022	0.893252
butyl_10mms_0g_run2	3	128	6.07469	0.935982
butyl_10mms_0g_run2	3	129	6.07582	0.890725
butyl_10mms_0g_run2	3	130	6.07696	0.917017
butyl_10mms_0g_run2	3	131	6.07809	0.888276
butyl_10mms_0g_run2	3	132	6.07922	0.900678
butyl_10mms_0g_run2	3	133	6.08368	0.873308
butyl_10mms_0g_run2	3	134	6.08482	0.892292
butyl_10mms_0g_run2	3	135	6.08595	0.910885
butyl_10mms_0g_run2	3	136	6.08709	0.8852
butyl_10mms_0g_run2	3	137	6.08822	0.920211
butyl_10mms_0g_run2	3	138	6.09269	0.911179
butyl_10mms_0g_run2	3	139	6.09382	0.912472
butyl_10mms_0g_run2	3	140	6.09496	0.87415
butyl_10mms_0g_run2	3	141	6.09609	0.916214
butyl_10mms_0g_run2	3	142	6.09722	0.89335
butyl_10mms_0g_run2	3	143	6.10168	0.912727
butyl_10mms_0g_run2	3	144	6.10282	0.894114
butyl_10mms_0g_run2	3	145	6.10395	0.892253
butyl_10mms_0g_run2	3	146	6.10508	0.915019
butyl_10mms_0g_run2	3	147	6.10622	0.893037
butyl_10mms_0g_run2	3	148	6.11068	0.903793
butyl_10mms_0g_run2	3	149	6.11182	0.892998
butyl_10mms_0g_run2	3	150	6.11295	0.911492
butyl_10mms_0g_run2	3	151	6.11408	0.894291
butyl_10mms_0g_run2	3	152	6.11522	0.891352
butyl_10mms_0g_run2	3	153	6.11969	0.883574
butyl_10mms_0g_run2	3	154	6.12082	0.91353
butyl_10mms_0g_run2	3	155	6.12195	0.89478
butyl_10mms_0g_run2	3	156	6.12309	0.89913
butyl_10mms_0g_run2	3	157	6.12422	0.927069
butyl_10mms_0g_run2	3	158	6.12869	0.916352
butyl_10mms_0g_run2	3	159	6.12983	0.882615
butyl_10mms_0g_run2	3	160	6.13096	0.899778
butyl_10mms_0g_run2	3	161	6.13209	0.869234
butyl_10mms_0g_run2	3	162	6.13323	0.86945
butyl_10mms_0g_run2	3	163	6.13769	0.905832
butyl_10mms_0g_run2	3	164	6.13882	0.8939
butyl_10mms_0g_run2	3	165	6.13996	0.908829
butyl_10mms_0g_run2	3	166	6.14109	0.908241
butyl_10mms_0g_run2	3	167	6.14222	0.885711
butyl_10mms_0g_run2	3	168	6.14669	0.889805
butyl_10mms_0g_run2	3	169	6.14783	0.898426
butyl_10mms_0g_run2	3	170	6.14896	0.87758
butyl_10mms_0g_run2	3	171	6.15009	0.863768
butyl_10mms_0g_run2	3	172	6.15122	0.907183
butyl_10mms_0g_run2	3	173	6.15566	0.892313
butyl_10mms_0g_run2	3	174	6.15676	0.892529
butyl_10mms_0g_run2	3	175	6.15786	0.925031
butyl_10mms_0g_run2	3	176	6.15896	0.85885
butyl_10mms_0g_run2	3	177	6.16006	0.914295
butyl_10mms_0g_run2	3	178	6.16468	0.878011
butyl_10mms_0g_run2	3	179	6.16581	0.898583
butyl_10mms_0g_run2	3	180	6.16694	0.862847
butyl_10mms_0g_run2	3	181	6.16807	0.884379
butyl_10mms_0g_run2	3	182	6.16921	0.903774
butyl_10mms_0g_run2	3	183	6.17369	0.889492
butyl_10mms_0g_run2	3	184	6.17482	0.909064
butyl_10mms_0g_run2	3	185	6.17596	0.910279
butyl_10mms_0g_run2	3	186	6.17709	0.873721
butyl_10mms_0g_run2	3	187	6.17823	0.910063
butyl_10mms_0g_run2	3	188	6.18269	0.869881
butyl_10mms_0g_run2	3	189	6.18382	0.903383
butyl_10mms_0g_run2	3	190	6.18496	0.879853
butyl_10mms_0g_run2	3	191	6.18609	0.897407
butyl_10mms_0g_run2	3	192	6.18723	0.892823
butyl_10mms_0g_run2	3	193	6.19169	0.898622
butyl_10mms_0g_run2	3	194	6.19282	0.913355
butyl_10mms_0g_run2	3	195	6.19395	0.870331
butyl_10mms_0g_run2	3	196	6.19509	0.909789
butyl_10mms_0g_run2	3	197	6.19622	0.881381
butyl_10mms_0g_run2	3	198	6.2007	0.903853
butyl_10mms_0g_run2	3	199	6.20183	0.87423
butyl_10mms_0g_run2	3	200	6.20296	0.907536
butyl_10mms_0g_run2	3	201	6.20409	0.884731
butyl_10mms_0g_run2	3	202	6.20523	0.884496
butyl_10mms_0g_run2	3	203	6.20969	0.886416
butyl_10mms_0g_run2	3	204	6.21083	0.899836
butyl_10mms_0g_run2	3	205	6.21196	0.885045
butyl_10mms_0g_run2	3	206	6.2131	0.883007
butyl_10mms_0g_run2	3	207	6.21423	0.906811
butyl_10mms_0g_run2	3	208	6.21869	0.883987
butyl_10mms_0g_run2	3	209	6.21983	0.905263
butyl_10mms_0g_run2	3	210	6.22096	0.865551
butyl_10mms_0g_run2	3	211	6.22209	0.912179
butyl_10mms_0g_run2	3	212	6.22323	0.87376
butyl_10mms_0g_run2	3	213	6.22769	0.906086
butyl_10mms_0g_run2	3	214	6.22883	0.870508
butyl_10mms_0g_run2	3	215	6.22996	0.904088
butyl_10mms_0g_run2	3	216	6.23109	0.889374
butyl_10mms_0g_run2	3	217	6.23223	0.833028
butyl_10mms_0g_run2	3	218	6.2367	0.873446
butyl_10mms_0g_run2	3	219	6.23783	0.889943
butyl_10mms_0g_run2	3	220	6.23896	0.895703
butyl_10mms_0g_run2	3	221	6.2401	0.871174
butyl_10mms_0g_run2	3	222	6.24123	0.928107
butyl_10mms_0g_run2	3	223	6.2457	0.884085
butyl_10mms_0g_run2	3	224	6.24683	0.907614
butyl_10mms_0g_run2	3	225	6.24796	0.864023
butyl_10mms_0g_run2	3	226	6.2491	0.888924
butyl_10mms_0g_run2	3	227	6.25023	0.877639
butyl_10mms_0g_run2	3	228	6.25469	0.892725
butyl_10mms_0g_run2	3	229	6.25582	0.894527
butyl_10mms_0g_run2	3	230	6.25696	0.865747
butyl_10mms_0g_run2	3	231	6.25809	0.921975
butyl_10mms_0g_run2	3	232	6.25923	0.878168
butyl_10mms_0g_run2	3	233	6.2637	0.87905
butyl_10mms_0g_run2	3	234	6.26483	0.867686
butyl_10mms_0g_run2	3	235	6.26596	0.879108
butyl_10mms_0g_run2	3	236	6.26709	0.871468
butyl_10mms_0g_run2	3	237	6.26823	0.868804
butyl_10mms_0g_run2	3	238	6.27269	0.866629
butyl_10mms_0g_run2	3	239	6.27383	0.922074
butyl_10mms_0g_run2	3	240	6.27497	0.895684
butyl_10mms_0g_run2	3	241	6.2761	0.884908
butyl_10mms_0g_run2	3	242	6.27723	0.893862
butyl_10mms_0g_run2	3	243	6.2817	0.877013
butyl_10mms_0g_run2	3	244	6.28283	0.874015
butyl_10mms_0g_run2	3	245	6.28397	0.874427
butyl_10mms_0g_run2	3	246	6.2851	0.892823
butyl_10mms_0g_run2	3	247	6.28623	0.855168
butyl_10mms_0g_run2	3	248	6.29069	0.862789
butyl_10mms_0g_run2	3	249	6.29183	0.795589
butyl_10mms_0g_run2	3	250	6.29296	0.794512
butyl_10mms_0g_run2	3	251	6.29409	0.765633
butyl_10mms_0g_run2	3	252	6.29523	0.733581
butyl_10mms_0g_run2	3	253	6.29966	0.691185
butyl_10mms_0g_run2	3	254	6.30077	0.760912
butyl_10mms_0g_run2	3	255	6.30187	0.728272
butyl_10mms_0g_run2	3	256	6.30297	0.73074
butyl_10mms_0g_run2	3	257	6.30408	0.748334
butyl_10mms_0g_run2	3	258	6.30868	0.748138
butyl_10mms_0g_run2	3	259	6.30982	0.735168
butyl_10mms_0g_run2	3	260	6.31095	0.75621
butyl_10mms_0g_run2	3	261	6.31209	0.711109
butyl_10mms_0g_run2	3	262	6.31322	0.750117
butyl_10mms_0g_run2	3	263	6.3177	0.718437
butyl_10mms_0g_run2	3	264	6.31883	0.707857
butyl_10mms_0g_run2	3	265	6.31996	0.708915
butyl_10mms_0g_run2	3	266	6.3211	0.735697
butyl_10mms_0g_run2	3	267	6.32223	0.707269
butyl_10mms_0g_run2	3	268	6.3267	0.728135
butyl_10mms_0g_run3	1	1	2.79092	0.50655
butyl_10mms_0g_run3	1	2	2.79205	0.509528
butyl_10mms_0g_run3	1	3	2.79319	0.487703
butyl_10mms_0g_run3	1	4	2.79432	0.511703
butyl_10mms_0g_run3	1	5	2.79878	0.484725
butyl_10mms_0g_run3	1	6	2.79992	0.508882
butyl_10mms_0g_run3	1	7	2.80105	0.498498
butyl_10mms_0g_run3	1	8	2.80219	0.497322
butyl_10mms_0g_run3	1	9	2.80332	0.521303
butyl_10mms_0g_run3	1	10	2.80779	0.508607
butyl_10mms_0g_run3	1	11	2.80892	0.492856
butyl_10mms_0g_run3	1	12	2.81006	0.496617
butyl_10mms_0g_run3	1	13	2.81119	0.514034
butyl_10mms_0g_run3	1	14	2.81232	0.465937
butyl_10mms_0g_run3	1	15	2.81679	0.497911
butyl_10mms_0g_run3	1	16	2.81792	0.491171
butyl_10mms_0g_run3	1	17	2.81905	0.519031
butyl_10mms_0g_run3	1	18	2.82019	0.502319
butyl_10mms_0g_run3	1	19	2.82132	0.512702
butyl_10mms_0g_run3	1	20	2.82579	0.510959
butyl_10mms_0g_run3	1	21	2.82692	0.555902
butyl_10mms_0g_run3	1	22	2.82806	0.551945
butyl_10mms_0g_run3	1	23	2.82919	0.576513
butyl_10mms_0g_run3	1	24	2.83033	0.64097
butyl_10mms_0g_run3	1	25	2.83478	0.715987
butyl_10mms_0g_run3	1	26	2.83592	0.756992
butyl_10mms_0g_run3	1	27	2.83706	0.764496
butyl_10mms_0g_run3	1	28	2.83819	0.799585
butyl_10mms_0g_run3	1	29	2.83932	0.768316
butyl_10mms_0g_run3	1	30	2.84375	0.819666
butyl_10mms_0g_run3	1	31	2.84486	0.799036
butyl_10mms_0g_run3	1	32	2.84596	0.803131
butyl_10mms_0g_run3	1	33	2.84706	0.860006
butyl_10mms_0g_run3	1	34	2.84816	0.818647
butyl_10mms_0g_run3	1	35	2.85278	0.895114
butyl_10mms_0g_run3	1	36	2.85391	0.865766
butyl_10mms_0g_run3	1	37	2.85504	0.891705
butyl_10mms_0g_run3	1	38	2.85618	0.87513
butyl_10mms_0g_run3	1	39	2.85732	0.848877
butyl_10mms_0g_run3	1	40	2.86179	0.847369
butyl_10mms_0g_run3	1	41	2.86293	0.856048
butyl_10mms_0g_run3	1	42	2.86406	0.842471
butyl_10mms_0g_run3	1	43	2.8652	0.885161
butyl_10mms_0g_run3	1	44	2.86633	0.858164
butyl_10mms_0g_run3	1	45	2.87079	0.908417
butyl_10mms_0g_run3	1	46	2.87192	0.909965
butyl_10mms_0g_run3	1	47	2.87305	0.863669
butyl_10mms_0g_run3	1	48	2.87419	0.902461
butyl_10mms_0g_run3	1	49	2.87532	0.869116
butyl_10mms_0g_run3	1	50	2.87979	0.876286
butyl_10mms_0g_run3	1	51	2.88092	0.843901
butyl_10mms_0g_run3	1	52	2.88206	0.888943
butyl_10mms_0g_run3	1	53	2.88319	0.866921
butyl_10mms_0g_run3	1	54	2.88433	0.875424
butyl_10mms_0g_run3	1	55	2.88879	0.830657
butyl_10mms_0g_run3	1	56	2.88993	0.881419
butyl_10mms_0g_run3	1	57	2.89107	0.848388
butyl_10mms_0g_run3	1	58	2.8922	0.878618
butyl_10mms_0g_run3	1	59	2.89333	0.860672
butyl_10mms_0g_run3	1	60	2.89779	0.846291
butyl_10mms_0g_run3	1	61	2.89892	0.863356
butyl_10mms_0g_run3	1	62	2.90006	0.847114
butyl_10mms_0g_run3	1	63	2.90119	0.874406
butyl_10mms_0g_run3	1	64	2.90233	0.843255
butyl_10mms_0g_run3	1	65	2.90679	0.87227
butyl_10mms_0g_run3	1	66	2.90792	0.832303
butyl_10mms_0g_run3	1	67	2.90906	0.853462
butyl_10mms_0g_run3	1	68	2.91019	0.852071
butyl_10mms_0g_run3	1	69	2.91133	0.841119
butyl_10mms_0g_run3	1	70	2.91579	0.834321
butyl_10mms_0g_run3	1	71	2.91692	0.841315
butyl_10mms_0g_run3	1	72	2.91806	0.841413
butyl_10mms_0g_run3	1	73	2.9192	0.826386
butyl_10mms_0g_run3	1	74	2.92033	0.890588
butyl_10mms_0g_run3	1	75	2.92479	0.819451
butyl_10mms_0g_run3	1	76	2.92593	0.830873
butyl_10mms_0g_run3	1	77	2.92706	0.80797
butyl_10mms_0g_run3	1	78	2.9282	0.83822
butyl_10mms_0g_run3	1	79	2.92933	0.784283
butyl_10mms_0g_run3	1	80	2.93379	0.825093
butyl_10mms_0g_run3	1	81	2.93493	0.803405
butyl_10mms_0g_run3	1	82	2.93606	0.817962
butyl_10mms_0g_run3	1	83	2.93719	0.838043
butyl_10mms_0g_run3	1	84	2.93833	0.808812
butyl_10mms_0g_run3	1	85	2.94279	0.823918
butyl_10mms_0g_run3	1	86	2.94392	0.788261
butyl_10mms_0g_run3	1	87	2.94506	0.818412
butyl_10mms_0g_run3	1	88	2.94619	0.781403
butyl_10mms_0g_run3	1	89	2.94733	0.807539
butyl_10mms_0g_run3	1	90	2.95179	0.792198
butyl_10mms_0g_run3	1	91	2.95292	0.822938
butyl_10mms_0g_run3	1	92	2.95406	0.825622
butyl_10mms_0g_run3	1	93	2.95519	0.813083
butyl_10mms_0g_run3	1	94	2.95633	0.836693
butyl_10mms_0g_run3	1	95	2.9608	0.819374
butyl_10mms_0g_run3	1	96	2.96193	0.775155
butyl_10mms_0g_run3	1	97	2.96307	0.78885
butyl_10mms_0g_run3	1	98	2.9642	0.819922
butyl_10mms_0g_run3	1	99	2.96534	0.783011
butyl_10mms_0g_run3	1	100	2.9698	0.823704
butyl_10mms_0g_run3	1	101	2.97093	0.80852
butyl_10mms_0g_run3	1	102	2.97206	0.827779
butyl_10mms_0g_run3	1	103	2.9732	0.805503
butyl_10mms_0g_run3	1	104	2.97433	0.809245
butyl_10mms_0g_run3	1	105	2.9788	0.771237
butyl_10mms_0g_run3	1	106	2.97993	0.819256
butyl_10mms_0g_run3	1	107	2.98107	0.793082
butyl_10mms_0g_run3	1	108	2.9822	0.805052
butyl_10mms_0g_run3	1	109	2.98333	0.844295
butyl_10mms_0g_run3	1	110	2.98776	0.842179
butyl_10mms_0g_run3	1	111	2.98887	0.775233
butyl_10mms_0g_run3	1	112	2.98997	0.820941
butyl_10mms_0g_run3	1	113	2.99107	0.797529
butyl_10mms_0g_run3	1	114	2.99218	0.814966
butyl_10mms_0g_run3	1	115	2.99678	0.786518
butyl_10mms_0g_run3	1	116	2.99792	0.820275
butyl_10mms_0g_run3	1	117	2.99905	0.784011
butyl_10mms_0g_run3	1	118	3.00019	0.832128
butyl_10mms_0g_run3	1	119	3.00132	0.782913
butyl_10mms_0g_run3	1	120	3.0058	0.819707
butyl_10mms_0g_run3	1	121	3.00693	0.791436
butyl_10mms_0g_run3	1	122	3.00807	0.816161
butyl_10mms_0g_run3	1	123	3.0092	0.787537
butyl_10mms_0g_run3	1	124	3.01033	0.811988
butyl_10mms_0g_run3	1	125	3.01479	0.769297
butyl_10mms_0g_run3	1	126	3.01593	0.820549
butyl_10mms_0g_run3	1	127	3.01706	0.790691
butyl_10mms_0g_run3	1	128	3.0182	0.798058
butyl_10mms_0g_run3	1	129	3.01933	0.82147
butyl_10mms_0g_run3	1	130	3.02379	0.806482
butyl_10mms_0g_run3	1	131	3.02493	0.805718
butyl_10mms_0g_run3	1	132	3.02606	0.783109
butyl_10mms_0g_run3	1	133	3.0272	0.820902
butyl_10mms_0g_run3	1	134	3.02833	0.779661
butyl_10mms_0g_run3	1	135	3.0328	0.805033
butyl_10mms_0g_run3	1	136	3.03394	0.785147
butyl_10mms_0g_run3	1	137	3.03507	0.821509
butyl_10mms_0g_run3	1	138	3.03621	0.788478
butyl_10mms_0g_run3	1	139	3.03734	0.8258
butyl_10mms_0g_run3	1	140	3.0418	0.777251
butyl_10mms_0g_run3	1	141	3.04293	0.806032
butyl_10mms_0g_run3	1	142	3.04407	0.804641
butyl_10mms_0g_run3	1	143	3.0452	0.77014
butyl_10mms_0g_run3	1	144	3.04633	0.79698
butyl_10mms_0g_run3	1	145	3.05079	0.786166
butyl_10mms_0g_run3	1	146	3.05193	0.817944
butyl_10mms_0g_run3	1	147	3.05306	0.792749
butyl_10mms_0g_run3	1	148	3.05419	0.810695
butyl_10mms_0g_run3	1	149	3.05533	0.810832
butyl_10mms_0g_run3	1	150	3.0598	0.814476
butyl_10mms_0g_run3	1	151	3.06093	0.788928
butyl_10mms_0g_run3	1	152	3.06206	0.757189
butyl_10mms_0g_run3	1	153	3.0632	0.806639
butyl_10mms_0g_run3	1	154	3.06433	0.771296
butyl_10mms_0g_run3	1	155	3.0688	0.796608
butyl_10mms_0g_run3	1	156	3.06994	0.808167
butyl_10mms_0g_run3	1	157	3.07107	0.827152
butyl_10mms_0g_run3	1	158	3.07221	0.78164
butyl_10mms_0g_run3	1	159	3.07334	0.807462
butyl_10mms_0g_run3	1	160	3.0778	0.77923
butyl_10mms_0g_run3	1	161	3.07893	0.802015
butyl_10mms_0g_run3	1	162	3.08007	0.779034
butyl_10mms_0g_run3	1	163	3.0812	0.795785
butyl_10mms_0g_run3	1	164	3.08234	0.803426
butyl_10mms_0g_run3	1	165	3.0868	0.818492
butyl_10mms_0g_run3	1	166	3.08793	0.829189
butyl_10mms_0g_run3	1	167	3.08906	0.793454
butyl_10mms_0g_run3	1	168	3.0902	0.821313
butyl_10mms_0g_run3	1	169	3.09133	0.780425
butyl_10mms_0g_run3	1	170	3.0958	0.793121
butyl_10mms_0g_run3	1	171	3.09693	0.775233
butyl_10mms_0g_run3	1	172	3.09807	0.815632
butyl_10mms_0g_run3	1	173	3.0992	0.782345
butyl_10mms_0g_run3	1	174	3.10034	0.81561
butyl_10mms_0g_run3	1	175	3.1048	0.806206
butyl_10mms_0g_run3	1	176	3.10593	0.822526
butyl_10mms_0g_run3	1	177	3.10707	0.808831
butyl_10mms_0g_run3	1	178	3.1082	0.797605
butyl_10mms_0g_run3	1	179	3.10933	0.809733
butyl_10mms_0g_run3	1	180	3.1138	0.821958
butyl_10mms_0g_run3	1	181	3.11493	0.807519
butyl_10mms_0g_run3	1	182	3.11606	0.797194
butyl_10mms_0g_run3	1	183	3.1172	0.791414
butyl_10mms_0g_run3	1	184	3.11833	0.815826
butyl_10mms_0g_run3	1	185	3.1228	0.820743
butyl_10mms_0g_run3	1	186	3.12394	0.794255
butyl_10mms_0g_run3	1	187	3.12507	0.806324
butyl_10mms_0g_run3	1	188	3.12621	0.800211
butyl_10mms_0g_run3	1	189	3.12734	0.795724
butyl_10mms_0g_run3	1	190	3.13177	0.791747
butyl_10mms_0g_run3	1	191	3.13287	0.821977
butyl_10mms_0g_run3	1	192	3.13398	0.799173
butyl_10mms_0g_run3	1	193	3.13508	0.792707
butyl_10mms_0g_run3	1	194	3.13618	0.825053
butyl_10mms_0g_run3	1	195	3.14079	0.803816
butyl_10mms_0g_run3	1	196	3.14192	0.790709
butyl_10mms_0g_run3	1	197	3.14306	0.814826
butyl_10mms_0g_run3	1	198	3.14419	0.79592
butyl_10mms_0g_run3	1	199	3.14533	0.767003
butyl_10mms_0g_run3	1	200	3.1498	0.830421
butyl_10mms_0g_run3	1	201	3.15094	0.798683
butyl_10mms_0g_run3	1	202	3.15207	0.796822
butyl_10mms_0g_run3	1	203	3.15321	0.817295
butyl_10mms_0g_run3	1	204	3.15434	0.802621
butyl_10mms_0g_run3	1	205	3.1588	0.807382
butyl_10mms_0g_run3	1	206	3.15994	0.788867
butyl_10mms_0g_run3	1	207	3.16107	0.815767
butyl_10mms_0g_run3	1	208	3.1622	0.770686
butyl_10mms_0g_run3	1	209	3.16334	0.797351
butyl_10mms_0g_run3	1	210	3.1678	0.794177
butyl_10mms_0g_run3	1	211	3.16893	0.797605
butyl_10mms_0g_run3	1	212	3.17006	0.824289
butyl_10mms_0g_run3	1	213	3.1712	0.806794
butyl_10mms_0g_run3	1	214	3.17234	0.825778
butyl_10mms_0g_run3	1	215	3.17681	0.819861
butyl_10mms_0g_run3	1	216	3.17794	0.790435
butyl_10mms_0g_run3	1	217	3.17908	0.778582
butyl_10mms_0g_run3	1	218	3.18021	0.812162
butyl_10mms_0g_run3	1	219	3.18135	0.775212
butyl_10mms_0g_run3	1	220	3.1858	0.815669
butyl_10mms_0g_run3	1	221	3.18694	0.829442
butyl_10mms_0g_run3	1	222	3.18807	0.821899
butyl_10mms_0g_run3	1	223	3.18921	0.810164
butyl_10mms_0g_run3	1	224	3.19034	0.794823
butyl_10mms_0g_run3	1	225	3.19481	0.794627
butyl_10mms_0g_run3	1	226	3.19594	0.78538
butyl_10mms_0g_run3	1	227	3.19708	0.82617
butyl_10mms_0g_run3	1	228	3.19821	0.789396
butyl_10mms_0g_run3	1	229	3.19934	0.813161
butyl_10mms_0g_run3	1	230	3.2038	0.802288
butyl_10mms_0g_run3	1	231	3.20494	0.83624
butyl_10mms_0g_run3	1	232	3.20608	0.792296
butyl_10mms_0g_run3	1	233	3.20721	0.804227
butyl_10mms_0g_run3	1	234	3.20834	0.796116
butyl_10mms_0g_run3	1	235	3.21281	0.803306
butyl_10mms_0g_run3	1	236	3.21394	0.796586
butyl_10mms_0g_run3	1	237	3.21508	0.792688
butyl_10mms_0g_run3	1	238	3.21621	0.820175
butyl_10mms_0g_run3	1	239	3.21734	0.773801
butyl_10mms_0g_run3	1	240	3.22181	0.810928
butyl_10mms_0g_run3	1	241	3.22294	0.780737
butyl_10mms_0g_run3	1	242	3.22408	0.797938
butyl_10mms_0g_run3	1	243	3.22521	0.742063
butyl_10mms_0g_run3	1	244	3.22634	0.779091
butyl_10mms_0g_run3	1	245	3.2308	0.675529
butyl_10mms_0g_run3	1	246	3.23194	0.697942
butyl_10mms_0g_run3	1	247	3.23307	0.682308
butyl_10mms_0g_run3	1	248	3.23421	0.66636
butyl_10mms_0g_run3	1	249	3.23534	0.672688
butyl_10mms_0g_run3	1	250	3.23981	0.677488
butyl_10mms_0g_run3	1	251	3.24094	0.662912
butyl_10mms_0g_run3	1	252	3.24207	0.652626
butyl_10mms_0g_run3	1	253	3.24321	0.676509
butyl_10mms_0g_run3	1	254	3.24434	0.66352
butyl_10mms_0g_run3	1	255	3.24881	0.672826
butyl_10mms_0g_run3	1	256	3.24994	0.644653
butyl_10mms_0g_run3	1	257	3.25107	0.654645
butyl_10mms_0g_run3	1	258	3.25221	0.65727
butyl_10mms_0g_run3	1	259	3.25334	0.631761
butyl_10mms_0g_run3	1	260	3.25781	0.633427
butyl_10mms_0g_run3	1	261	3.25894	0.640715
butyl_10mms_0g_run3	1	262	3.26008	0.654468
butyl_10mms_0g_run3	1	263	3.26121	0.633642
butyl_10mms_0g_run3	1	264	3.26235	0.645358
butyl_10mms_0g_run3	1	265	3.26681	0.63088
butyl_10mms_0g_run3	1	266	3.26795	0.652215
butyl_10mms_0g_run3	1	267	3.26908	0.624375
butyl_10mms_0g_run3	1	268	3.27021	0.669299
butyl_10mms_0g_run3	2	1	3.78997	0.54838
butyl_10mms_0g_run3	2	2	3.7911	0.528494
butyl_10mms_0g_run3	2	3	3.79224	0.521676
butyl_10mms_0g_run3	2	4	3.79337	0.551965
butyl_10mms_0g_run3	2	5	3.79783	0.515955
butyl_10mms_0g_run3	2	6	3.79897	0.54358
butyl_10mms_0g_run3	2	7	3.8001	0.515583
butyl_10mms_0g_run3	2	8	3.80124	0.552357
butyl_10mms_0g_run3	2	9	3.80237	0.525202
butyl_10mms_0g_run3	2	10	3.80683	0.538368
butyl_10mms_0g_run3	2	11	3.80796	0.527632
butyl_10mms_0g_run3	2	12	3.8091	0.516641
butyl_10mms_0g_run3	2	13	3.81023	0.547831
butyl_10mms_0g_run3	2	14	3.81136	0.518698
butyl_10mms_0g_run3	2	15	3.81583	0.527201
butyl_10mms_0g_run3	2	16	3.81697	0.520657
butyl_10mms_0g_run3	2	17	3.8181	0.539524
butyl_10mms_0g_run3	2	18	3.81924	0.519188
butyl_10mms_0g_run3	2	19	3.82037	0.576533
butyl_10mms_0g_run3	2	20	3.82484	0.521774
butyl_10mms_0g_run3	2	21	3.82597	0.539818
butyl_10mms_0g_run3	2	22	3.8271	0.52436
butyl_10mms_0g_run3	2	23	3.82824	0.526222
butyl_10mms_0g_run3	2	24	3.82937	0.528142
butyl_10mms_0g_run3	2	25	3.83384	0.560938
butyl_10mms_0g_run3	2	26	3.83497	0.564602
butyl_10mms_0g_run3	2	27	3.83611	0.574319
butyl_10mms_0g_run3	2	28	3.83724	0.628256
butyl_10mms_0g_run3	2	29	3.83838	0.645555
butyl_10mms_0g_run3	2	30	3.84284	0.741986
butyl_10mms_0g_run3	2	31	3.84397	0.727527
butyl_10mms_0g_run3	2	32	3.8451	0.777369
butyl_10mms_0g_run3	2	33	3.84623	0.761108
butyl_10mms_0g_run3	2	34	3.84737	0.764183
butyl_10mms_0g_run3	2	35	3.8518	0.795021
butyl_10mms_0g_run3	2	36	3.85291	0.842609
butyl_10mms_0g_run3	2	37	3.85401	0.841101
butyl_10mms_0g_run3	2	38	3.85511	0.851876
butyl_10mms_0g_run3	2	39	3.85622	0.870704
butyl_10mms_0g_run3	2	40	3.86082	0.879736
butyl_10mms_0g_run3	2	41	3.86196	0.837516
butyl_10mms_0g_run3	2	42	3.86309	0.893039
butyl_10mms_0g_run3	2	43	3.86422	0.850995
butyl_10mms_0g_run3	2	44	3.86536	0.904813
butyl_10mms_0g_run3	2	45	3.86984	0.90354
butyl_10mms_0g_run3	2	46	3.87097	0.892412
butyl_10mms_0g_run3	2	47	3.8721	0.869
butyl_10mms_0g_run3	2	48	3.87324	0.906146
butyl_10mms_0g_run3	2	49	3.87437	0.875582
butyl_10mms_0g_run3	2	50	3.87884	0.875974
butyl_10mms_0g_run3	2	51	3.87997	0.878874
butyl_10mms_0g_run3	2	52	3.88111	0.905127
butyl_10mms_0g_run3	2	53	3.88224	0.874054
butyl_10mms_0g_run3	2	54	3.88337	0.898759
butyl_10mms_0g_run3	2	55	3.88783	0.886808
butyl_10mms_0g_run3	2	56	3.88897	0.902482
butyl_10mms_0g_run3	2	57	3.89011	0.873192
butyl_10mms_0g_run3	2	58	3.89124	0.869078
butyl_10mms_0g_run3	2	59	3.89237	0.901267
butyl_10mms_0g_run3	2	60	3.89684	0.874328
butyl_10mms_0g_run3	2	61	3.89798	0.857989
butyl_10mms_0g_run3	2	62	3.89911	0.850975
butyl_10mms_0g_run3	2	63	3.90024	0.882165
butyl_10mms_0g_run3	2	64	3.90138	0.858557
butyl_10mms_0g_run3	2	65	3.90584	0.879932
butyl_10mms_0g_run3	2	66	3.90697	0.8325
butyl_10mms_0g_run3	2	67	3.9081	0.862515
butyl_10mms_0g_run3	2	68	3.90924	0.839377
butyl_10mms_0g_run3	2	69	3.91038	0.838417
butyl_10mms_0g_run3	2	70	3.91484	0.803876
butyl_10mms_0g_run3	2	71	3.91597	0.840396
butyl_10mms_0g_run3	2	72	3.91711	0.838573
butyl_10mms_0g_run3	2	73	3.91824	0.811752
butyl_10mms_0g_run3	2	74	3.91938	0.854619
butyl_10mms_0g_run3	2	75	3.92384	0.824036
butyl_10mms_0g_run3	2	76	3.92497	0.845431
butyl_10mms_0g_run3	2	77	3.9261	0.8104
butyl_10mms_0g_run3	2	78	3.92724	0.834851
butyl_10mms_0g_run3	2	79	3.92837	0.822273
butyl_10mms_0g_run3	2	80	3.93284	0.850015
butyl_10mms_0g_run3	2	81	3.93398	0.803896
butyl_10mms_0g_run3	2	82	3.93511	0.833793
butyl_10mms_0g_run3	2	83	3.93624	0.824193
butyl_10mms_0g_run3	2	84	3.93738	0.831148
butyl_10mms_0g_run3	2	85	3.94184	0.811674
butyl_10mms_0g_run3	2	86	3.94298	0.831246
butyl_10mms_0g_run3	2	87	3.94411	0.820588
butyl_10mms_0g_run3	2	88	3.94525	0.777604
butyl_10mms_0g_run3	2	89	3.94638	0.813261
butyl_10mms_0g_run3	2	90	3.95084	0.798136
butyl_10mms_0g_run3	2	91	3.95197	0.825937
butyl_10mms_0g_run3	2	92	3.9531	0.825839
butyl_10mms_0g_run3	2	93	3.95424	0.812105
butyl_10mms_0g_run3	2	94	3.95538	0.824996
butyl_10mms_0g_run3	2	95	3.95984	0.821176
butyl_10mms_0g_run3	2	96	3.96098	0.816141
butyl_10mms_0g_run3	2	97	3.96211	0.78356
butyl_10mms_0g_run3	2	98	3.96325	0.813947
butyl_10mms_0g_run3	2	99	3.96438	0.791749
butyl_10mms_0g_run3	2	100	3.96884	0.832167
butyl_10mms_0g_run3	2	101	3.96997	0.784403
butyl_10mms_0g_run3	2	102	3.97111	0.845509
butyl_10mms_0g_run3	2	103	3.97224	0.792396
butyl_10mms_0g_run3	2	104	3.97338	0.803073
butyl_10mms_0g_run3	2	105	3.97784	0.776056
butyl_10mms_0g_run3	2	106	3.97898	0.805346
butyl_10mms_0g_run3	2	107	3.98011	0.793865
butyl_10mms_0g_run3	2	108	3.98125	0.800977
butyl_10mms_0g_run3	2	109	3.98238	0.823155
butyl_10mms_0g_run3	2	110	3.98684	0.817513
butyl_10mms_0g_run3	2	111	3.98797	0.835184
butyl_10mms_0g_run3	2	112	3.9891	0.818845
butyl_10mms_0g_run3	2	113	3.99024	0.802995
butyl_10mms_0g_run3	2	114	3.99137	0.819981
butyl_10mms_0g_run3	2	115	3.99581	0.802721
butyl_10mms_0g_run3	2	116	3.99691	0.797176
butyl_10mms_0g_run3	2	117	3.99801	0.811576
butyl_10mms_0g_run3	2	118	3.99911	0.81573
butyl_10mms_0g_run3	2	119	4.00022	0.785794
butyl_10mms_0g_run3	2	120	4.00483	0.85074
butyl_10mms_0g_run3	2	121	4.00596	0.794375
butyl_10mms_0g_run3	2	122	4.0071	0.814515
butyl_10mms_0g_run3	2	123	4.00823	0.816082
[truncated: 32,813 more rows]

## Sheet: C5
VariableName	CellIndex	RowIndex	Time (s)	Force (N)
pentyl_10mms_0g_run1	1	1	3.06343	0.655175
pentyl_10mms_0g_run1	1	2	3.06456	0.655743
pentyl_10mms_0g_run1	1	3	3.06903	0.656214
pentyl_10mms_0g_run1	1	4	3.07016	0.673572
pentyl_10mms_0g_run1	1	5	3.0713	0.657115
pentyl_10mms_0g_run1	1	6	3.07243	0.664579
pentyl_10mms_0g_run1	1	7	3.07357	0.688168
pentyl_10mms_0g_run1	1	8	3.07803	0.65927
pentyl_10mms_0g_run1	1	9	3.07916	0.665696
pentyl_10mms_0g_run1	1	10	3.0803	0.649944
pentyl_10mms_0g_run1	1	11	3.08143	0.636798
pentyl_10mms_0g_run1	1	12	3.08257	0.6396
pentyl_10mms_0g_run1	1	13	3.08703	0.672984
pentyl_10mms_0g_run1	1	14	3.08816	0.654979
pentyl_10mms_0g_run1	1	15	3.0893	0.664736
pentyl_10mms_0g_run1	1	16	3.09043	0.682271
pentyl_10mms_0g_run1	1	17	3.09156	0.634604
pentyl_10mms_0g_run1	1	18	3.09603	0.664423
pentyl_10mms_0g_run1	1	19	3.09717	0.688344
pentyl_10mms_0g_run1	1	20	3.0983	0.682506
pentyl_10mms_0g_run1	1	21	3.09943	0.694006
pentyl_10mms_0g_run1	1	22	3.10057	0.75182
pentyl_10mms_0g_run1	1	23	3.10503	0.879696
pentyl_10mms_0g_run1	1	24	3.10617	0.925991
pentyl_10mms_0g_run1	1	25	3.1073	0.955007
pentyl_10mms_0g_run1	1	26	3.10844	0.999362
pentyl_10mms_0g_run1	1	27	3.10957	0.9899
pentyl_10mms_0g_run1	1	28	3.11403	1.05406
pentyl_10mms_0g_run1	1	29	3.11517	1.0233
pentyl_10mms_0g_run1	1	30	3.1163	1.06339
pentyl_10mms_0g_run1	1	31	3.11743	1.07189
pentyl_10mms_0g_run1	1	32	3.11856	1.07889
pentyl_10mms_0g_run1	1	33	3.12303	1.16309
pentyl_10mms_0g_run1	1	34	3.12416	1.15161
pentyl_10mms_0g_run1	1	35	3.1253	1.15839
pentyl_10mms_0g_run1	1	36	3.12643	1.13531
pentyl_10mms_0g_run1	1	37	3.12757	1.14718
pentyl_10mms_0g_run1	1	38	3.132	1.09903
pentyl_10mms_0g_run1	1	39	3.1331	1.12965
pentyl_10mms_0g_run1	1	40	3.1342	1.10714
pentyl_10mms_0g_run1	1	41	3.1353	1.10876
pentyl_10mms_0g_run1	1	42	3.13641	1.12802
pentyl_10mms_0g_run1	1	43	3.14102	1.11211
pentyl_10mms_0g_run1	1	44	3.14215	1.12493
pentyl_10mms_0g_run1	1	45	3.14329	1.11437
pentyl_10mms_0g_run1	1	46	3.14442	1.10957
pentyl_10mms_0g_run1	1	47	3.14555	1.10961
pentyl_10mms_0g_run1	1	48	3.15003	1.09148
pentyl_10mms_0g_run1	1	49	3.15117	1.08786
pentyl_10mms_0g_run1	1	50	3.1523	1.10992
pentyl_10mms_0g_run1	1	51	3.15344	1.08592
pentyl_10mms_0g_run1	1	52	3.15457	1.09334
pentyl_10mms_0g_run1	1	53	3.15904	1.08935
pentyl_10mms_0g_run1	1	54	3.16017	1.10169
pentyl_10mms_0g_run1	1	55	3.16131	1.08208
pentyl_10mms_0g_run1	1	56	3.16244	1.07967
pentyl_10mms_0g_run1	1	57	3.16357	1.10196
pentyl_10mms_0g_run1	1	58	3.16803	1.08672
pentyl_10mms_0g_run1	1	59	3.16917	1.1098
pentyl_10mms_0g_run1	1	60	3.1703	1.07988
pentyl_10mms_0g_run1	1	61	3.17144	1.1042
pentyl_10mms_0g_run1	1	62	3.17257	1.10461
pentyl_10mms_0g_run1	1	63	3.17704	1.09591
pentyl_10mms_0g_run1	1	64	3.17817	1.07644
pentyl_10mms_0g_run1	1	65	3.17931	1.10114
pentyl_10mms_0g_run1	1	66	3.18045	1.08772
pentyl_10mms_0g_run1	1	67	3.18158	1.0665
pentyl_10mms_0g_run1	1	68	3.18603	1.08253
pentyl_10mms_0g_run1	1	69	3.18717	1.08643
pentyl_10mms_0g_run1	1	70	3.1883	1.10612
pentyl_10mms_0g_run1	1	71	3.18944	1.0742
pentyl_10mms_0g_run1	1	72	3.19057	1.11429
pentyl_10mms_0g_run1	1	73	3.19504	1.07783
pentyl_10mms_0g_run1	1	74	3.19617	1.10179
pentyl_10mms_0g_run1	1	75	3.1973	1.07914
pentyl_10mms_0g_run1	1	76	3.19843	1.05391
pentyl_10mms_0g_run1	1	77	3.19956	1.08764
pentyl_10mms_0g_run1	1	78	3.20404	1.09521
pentyl_10mms_0g_run1	1	79	3.20517	1.08212
pentyl_10mms_0g_run1	1	80	3.2063	1.08343
pentyl_10mms_0g_run1	1	81	3.20743	1.11021
pentyl_10mms_0g_run1	1	82	3.20857	1.09507
pentyl_10mms_0g_run1	1	83	3.21304	1.07826
pentyl_10mms_0g_run1	1	84	3.21417	1.06411
pentyl_10mms_0g_run1	1	85	3.21531	1.06648
pentyl_10mms_0g_run1	1	86	3.21644	1.08925
pentyl_10mms_0g_run1	1	87	3.21758	1.0704
pentyl_10mms_0g_run1	1	88	3.22204	1.06979
pentyl_10mms_0g_run1	1	89	3.22317	1.10917
pentyl_10mms_0g_run1	1	90	3.2243	1.09942
pentyl_10mms_0g_run1	1	91	3.22544	1.06658
pentyl_10mms_0g_run1	1	92	3.22657	1.08641
pentyl_10mms_0g_run1	1	93	3.23104	1.06421
pentyl_10mms_0g_run1	1	94	3.23217	1.06786
pentyl_10mms_0g_run1	1	95	3.2333	1.06298
pentyl_10mms_0g_run1	1	96	3.23443	1.06901
pentyl_10mms_0g_run1	1	97	3.23557	1.08161
pentyl_10mms_0g_run1	1	98	3.24004	1.10735
pentyl_10mms_0g_run1	1	99	3.24117	1.0696
pentyl_10mms_0g_run1	1	100	3.2423	1.07489
pentyl_10mms_0g_run1	1	101	3.24344	1.079
pentyl_10mms_0g_run1	1	102	3.24457	1.06315
pentyl_10mms_0g_run1	1	103	3.24904	1.04082
pentyl_10mms_0g_run1	1	104	3.25018	1.05794
pentyl_10mms_0g_run1	1	105	3.25131	1.07726
pentyl_10mms_0g_run1	1	106	3.25244	1.07085
pentyl_10mms_0g_run1	1	107	3.25358	1.07867
pentyl_10mms_0g_run1	1	108	3.25804	1.0636
pentyl_10mms_0g_run1	1	109	3.25917	1.08692
pentyl_10mms_0g_run1	1	110	3.26031	1.06415
pentyl_10mms_0g_run1	1	111	3.26144	1.06114
pentyl_10mms_0g_run1	1	112	3.26258	1.06946
pentyl_10mms_0g_run1	1	113	3.26704	1.06415
pentyl_10mms_0g_run1	1	114	3.26817	1.07489
pentyl_10mms_0g_run1	1	115	3.26931	1.05142
pentyl_10mms_0g_run1	1	116	3.27044	1.0783
pentyl_10mms_0g_run1	1	117	3.27157	1.0714
pentyl_10mms_0g_run1	1	118	3.27601	1.0717
pentyl_10mms_0g_run1	1	119	3.27711	1.06733
pentyl_10mms_0g_run1	1	120	3.27821	1.05853
pentyl_10mms_0g_run1	1	121	3.27931	1.07557
pentyl_10mms_0g_run1	1	122	3.28041	1.06021
pentyl_10mms_0g_run1	1	123	3.28503	1.06835
pentyl_10mms_0g_run1	1	124	3.28616	1.05357
pentyl_10mms_0g_run1	1	125	3.28729	1.07213
pentyl_10mms_0g_run1	1	126	3.28842	1.07667
pentyl_10mms_0g_run1	1	127	3.28956	1.05299
pentyl_10mms_0g_run1	1	128	3.29404	1.05616
pentyl_10mms_0g_run1	1	129	3.29518	1.06633
pentyl_10mms_0g_run1	1	130	3.29631	1.05634
pentyl_10mms_0g_run1	1	131	3.29744	1.06188
pentyl_10mms_0g_run1	1	132	3.29857	1.04752
pentyl_10mms_0g_run1	1	133	3.30304	1.07906
pentyl_10mms_0g_run1	1	134	3.30417	1.0647
pentyl_10mms_0g_run1	1	135	3.30531	1.06717
pentyl_10mms_0g_run1	1	136	3.30644	1.10682
pentyl_10mms_0g_run1	1	137	3.30757	1.07023
pentyl_10mms_0g_run1	1	138	3.31204	1.063
pentyl_10mms_0g_run1	1	139	3.31317	1.05308
pentyl_10mms_0g_run1	1	140	3.3143	1.06707
pentyl_10mms_0g_run1	1	141	3.31544	1.0417
pentyl_10mms_0g_run1	1	142	3.31657	1.07834
pentyl_10mms_0g_run1	1	143	3.32105	1.06349
pentyl_10mms_0g_run1	1	144	3.32218	1.07599
pentyl_10mms_0g_run1	1	145	3.32331	1.07377
pentyl_10mms_0g_run1	1	146	3.32445	1.09317
pentyl_10mms_0g_run1	1	147	3.32558	1.06321
pentyl_10mms_0g_run1	1	148	3.33004	1.06786
pentyl_10mms_0g_run1	1	149	3.33118	1.05639
pentyl_10mms_0g_run1	1	150	3.33231	1.0474
pentyl_10mms_0g_run1	1	151	3.33345	1.05291
pentyl_10mms_0g_run1	1	152	3.33458	1.05244
pentyl_10mms_0g_run1	1	153	3.33904	1.07219
pentyl_10mms_0g_run1	1	154	3.34017	1.07855
pentyl_10mms_0g_run1	1	155	3.34131	1.07642
pentyl_10mms_0g_run1	1	156	3.34244	1.07844
pentyl_10mms_0g_run1	1	157	3.34357	1.05291
pentyl_10mms_0g_run1	1	158	3.34804	1.03322
pentyl_10mms_0g_run1	1	159	3.34917	1.04632
pentyl_10mms_0g_run1	1	160	3.3503	1.06243
pentyl_10mms_0g_run1	1	161	3.35144	1.0525
pentyl_10mms_0g_run1	1	162	3.35257	1.05183
pentyl_10mms_0g_run1	1	163	3.35705	1.09332
pentyl_10mms_0g_run1	1	164	3.35818	1.05669
pentyl_10mms_0g_run1	1	165	3.35931	1.05751
pentyl_10mms_0g_run1	1	166	3.36044	1.07528
pentyl_10mms_0g_run1	1	167	3.36158	1.05336
pentyl_10mms_0g_run1	1	168	3.36604	1.06051
pentyl_10mms_0g_run1	1	169	3.36717	1.04828
pentyl_10mms_0g_run1	1	170	3.36831	1.06648
pentyl_10mms_0g_run1	1	171	3.36944	1.06739
pentyl_10mms_0g_run1	1	172	3.37058	1.05583
pentyl_10mms_0g_run1	1	173	3.37504	1.06729
pentyl_10mms_0g_run1	1	174	3.37617	1.06501
pentyl_10mms_0g_run1	1	175	3.37731	1.06317
pentyl_10mms_0g_run1	1	176	3.37844	1.0531
pentyl_10mms_0g_run1	1	177	3.37957	1.06204
pentyl_10mms_0g_run1	1	178	3.38405	1.056
pentyl_10mms_0g_run1	1	179	3.38518	1.06229
pentyl_10mms_0g_run1	1	180	3.38631	1.04836
pentyl_10mms_0g_run1	1	181	3.38745	1.0669
pentyl_10mms_0g_run1	1	182	3.38858	1.07667
pentyl_10mms_0g_run1	1	183	3.39305	1.07265
pentyl_10mms_0g_run1	1	184	3.39418	1.04193
pentyl_10mms_0g_run1	1	185	3.39531	1.0571
pentyl_10mms_0g_run1	1	186	3.39644	1.07602
pentyl_10mms_0g_run1	1	187	3.39758	1.04587
pentyl_10mms_0g_run1	1	188	3.40205	1.057
pentyl_10mms_0g_run1	1	189	3.40318	1.05541
pentyl_10mms_0g_run1	1	190	3.40431	1.081
pentyl_10mms_0g_run1	1	191	3.40545	1.05059
pentyl_10mms_0g_run1	1	192	3.40659	1.09305
pentyl_10mms_0g_run1	1	193	3.41104	1.06358
pentyl_10mms_0g_run1	1	194	3.41218	1.07122
pentyl_10mms_0g_run1	1	195	3.41331	1.06258
pentyl_10mms_0g_run1	1	196	3.41444	1.04938
pentyl_10mms_0g_run1	1	197	3.41558	1.05543
pentyl_10mms_0g_run1	1	198	3.42001	1.0772
pentyl_10mms_0g_run1	1	199	3.42111	1.0562
pentyl_10mms_0g_run1	1	200	3.42222	1.07559
pentyl_10mms_0g_run1	1	201	3.42332	1.07285
pentyl_10mms_0g_run1	1	202	3.42442	1.07918
pentyl_10mms_0g_run1	1	203	3.42903	1.05925
pentyl_10mms_0g_run1	1	204	3.43017	1.06482
pentyl_10mms_0g_run1	1	205	3.4313	1.04368
pentyl_10mms_0g_run1	1	206	3.43243	1.05637
pentyl_10mms_0g_run1	1	207	3.43357	1.04319
pentyl_10mms_0g_run1	1	208	3.43805	1.05216
pentyl_10mms_0g_run1	1	209	3.43918	1.06662
pentyl_10mms_0g_run1	1	210	3.44031	1.09575
pentyl_10mms_0g_run1	1	211	3.44144	1.04869
pentyl_10mms_0g_run1	1	212	3.44258	1.06756
pentyl_10mms_0g_run1	1	213	3.44705	1.0549
pentyl_10mms_0g_run1	1	214	3.44818	1.04017
pentyl_10mms_0g_run1	1	215	3.44932	1.03261
pentyl_10mms_0g_run1	1	216	3.45045	1.05815
pentyl_10mms_0g_run1	1	217	3.45158	1.06429
pentyl_10mms_0g_run1	1	218	3.45605	1.07749
pentyl_10mms_0g_run1	1	219	3.45718	1.08327
pentyl_10mms_0g_run1	1	220	3.45831	1.03848
pentyl_10mms_0g_run1	1	221	3.45944	1.07779
pentyl_10mms_0g_run1	1	222	3.46057	1.06329
pentyl_10mms_0g_run1	1	223	3.46505	1.0378
pentyl_10mms_0g_run1	1	224	3.46619	1.04846
pentyl_10mms_0g_run1	1	225	3.46732	1.06962
pentyl_10mms_0g_run1	1	226	3.46845	1.05939
pentyl_10mms_0g_run1	1	227	3.46959	1.06534
pentyl_10mms_0g_run1	1	228	3.47405	1.06707
pentyl_10mms_0g_run1	1	229	3.47518	1.07749
pentyl_10mms_0g_run1	1	230	3.47631	1.07677
pentyl_10mms_0g_run1	1	231	3.47744	1.04048
pentyl_10mms_0g_run1	1	232	3.47857	1.06397
pentyl_10mms_0g_run1	1	233	3.48305	1.06148
pentyl_10mms_0g_run1	1	234	3.48418	1.06472
pentyl_10mms_0g_run1	1	235	3.48532	1.04709
pentyl_10mms_0g_run1	1	236	3.48645	1.07355
pentyl_10mms_0g_run1	1	237	3.48758	1.06074
pentyl_10mms_0g_run1	1	238	3.49205	1.08486
pentyl_10mms_0g_run1	1	239	3.49318	1.04297
pentyl_10mms_0g_run1	1	240	3.49431	1.06143
pentyl_10mms_0g_run1	1	241	3.49545	1.04761
pentyl_10mms_0g_run1	1	242	3.49658	1.03055
pentyl_10mms_0g_run1	1	243	3.50105	0.960176
pentyl_10mms_0g_run1	1	244	3.50219	0.96239
pentyl_10mms_0g_run1	1	245	3.50332	0.939389
pentyl_10mms_0g_run1	1	246	3.50445	0.904614
pentyl_10mms_0g_run1	1	247	3.50559	0.914723
pentyl_10mms_0g_run1	1	248	3.51005	0.871524
pentyl_10mms_0g_run1	1	249	3.51119	0.879928
pentyl_10mms_0g_run1	1	250	3.51232	0.860533
pentyl_10mms_0g_run1	1	251	3.51346	0.888275
pentyl_10mms_0g_run1	1	252	3.51459	0.86643
pentyl_10mms_0g_run1	1	253	3.51905	0.894387
pentyl_10mms_0g_run1	1	254	3.52018	0.880399
pentyl_10mms_0g_run1	1	255	3.52132	0.875422
pentyl_10mms_0g_run1	1	256	3.52245	0.877538
pentyl_10mms_0g_run1	1	257	3.52359	0.87364
pentyl_10mms_0g_run1	1	258	3.52805	0.843958
pentyl_10mms_0g_run1	1	259	3.52919	0.84484
pentyl_10mms_0g_run1	1	260	3.53032	0.851716
pentyl_10mms_0g_run1	1	261	3.53146	0.810456
pentyl_10mms_0g_run1	1	262	3.5326	0.852559
pentyl_10mms_0g_run1	1	263	3.53705	0.845584
pentyl_10mms_0g_run1	1	264	3.53819	0.861042
pentyl_10mms_0g_run1	1	265	3.53932	0.846524
pentyl_10mms_0g_run1	1	266	3.54046	0.873541
pentyl_10mms_0g_run1	1	267	3.54159	0.829675
pentyl_10mms_0g_run1	1	268	3.54605	0.844448
pentyl_10mms_0g_run1	2	1	3.99714	0.718983
pentyl_10mms_0g_run1	2	2	3.99825	0.665968
pentyl_10mms_0g_run1	2	3	3.99935	0.701311
pentyl_10mms_0g_run1	2	4	4.00045	0.702859
pentyl_10mms_0g_run1	2	5	4.00506	0.716064
pentyl_10mms_0g_run1	2	6	4.0062	0.707463
pentyl_10mms_0g_run1	2	7	4.00733	0.742512
pentyl_10mms_0g_run1	2	8	4.00846	0.697961
pentyl_10mms_0g_run1	2	9	4.0096	0.711401
pentyl_10mms_0g_run1	2	10	4.01407	0.714379
pentyl_10mms_0g_run1	2	11	4.01521	0.687695
pentyl_10mms_0g_run1	2	12	4.01634	0.692044
pentyl_10mms_0g_run1	2	13	4.01747	0.717396
pentyl_10mms_0g_run1	2	14	4.01861	0.701154
pentyl_10mms_0g_run1	2	15	4.02307	0.722137
pentyl_10mms_0g_run1	2	16	4.0242	0.719649
pentyl_10mms_0g_run1	2	17	4.02534	0.727113
pentyl_10mms_0g_run1	2	18	4.02647	0.710833
pentyl_10mms_0g_run1	2	19	4.0276	0.689066
pentyl_10mms_0g_run1	2	20	4.03207	0.681563
pentyl_10mms_0g_run1	2	21	4.0332	0.711969
pentyl_10mms_0g_run1	2	22	4.03434	0.727427
pentyl_10mms_0g_run1	2	23	4.03547	0.724762
pentyl_10mms_0g_run1	2	24	4.0366	0.753307
pentyl_10mms_0g_run1	2	25	4.04108	0.87601
pentyl_10mms_0g_run1	2	26	4.04222	0.900108
pentyl_10mms_0g_run1	2	27	4.04335	0.929692
pentyl_10mms_0g_run1	2	28	4.04448	0.979102
pentyl_10mms_0g_run1	2	29	4.04562	0.981629
pentyl_10mms_0g_run1	2	30	4.05007	1.08742
pentyl_10mms_0g_run1	2	31	4.0512	1.0674
pentyl_10mms_0g_run1	2	32	4.05234	1.07804
pentyl_10mms_0g_run1	2	33	4.05347	1.10416
pentyl_10mms_0g_run1	2	34	4.0546	1.1048
pentyl_10mms_0g_run1	2	35	4.05907	1.14644
pentyl_10mms_0g_run1	2	36	4.06021	1.13409
pentyl_10mms_0g_run1	2	37	4.06134	1.17
pentyl_10mms_0g_run1	2	38	4.06248	1.15282
pentyl_10mms_0g_run1	2	39	4.06361	1.15811
pentyl_10mms_0g_run1	2	40	4.06808	1.12422
pentyl_10mms_0g_run1	2	41	4.06921	1.15574
pentyl_10mms_0g_run1	2	42	4.07034	1.13885
pentyl_10mms_0g_run1	2	43	4.07148	1.13066
pentyl_10mms_0g_run1	2	44	4.07261	1.13687
pentyl_10mms_0g_run1	2	45	4.07708	1.13858
pentyl_10mms_0g_run1	2	46	4.07821	1.12986
pentyl_10mms_0g_run1	2	47	4.07935	1.12222
pentyl_10mms_0g_run1	2	48	4.08048	1.12982
pentyl_10mms_0g_run1	2	49	4.08161	1.07996
pentyl_10mms_0g_run1	2	50	4.08607	1.12116
pentyl_10mms_0g_run1	2	51	4.08721	1.10218
pentyl_10mms_0g_run1	2	52	4.08834	1.11045
pentyl_10mms_0g_run1	2	53	4.08948	1.10949
pentyl_10mms_0g_run1	2	54	4.09061	1.12549
pentyl_10mms_0g_run1	2	55	4.09507	1.09556
pentyl_10mms_0g_run1	2	56	4.09621	1.0907
pentyl_10mms_0g_run1	2	57	4.09735	1.09661
pentyl_10mms_0g_run1	2	58	4.09848	1.07073
pentyl_10mms_0g_run1	2	59	4.09961	1.08554
pentyl_10mms_0g_run1	2	60	4.10408	1.09268
pentyl_10mms_0g_run1	2	61	4.10521	1.10717
pentyl_10mms_0g_run1	2	62	4.10634	1.09718
pentyl_10mms_0g_run1	2	63	4.10748	1.11542
pentyl_10mms_0g_run1	2	64	4.10861	1.10864
pentyl_10mms_0g_run1	2	65	4.11308	1.10372
pentyl_10mms_0g_run1	2	66	4.11421	1.08741
pentyl_10mms_0g_run1	2	67	4.11534	1.06356
pentyl_10mms_0g_run1	2	68	4.11648	1.09844
pentyl_10mms_0g_run1	2	69	4.11761	1.07418
pentyl_10mms_0g_run1	2	70	4.12208	1.09236
pentyl_10mms_0g_run1	2	71	4.12321	1.11056
pentyl_10mms_0g_run1	2	72	4.12435	1.10958
pentyl_10mms_0g_run1	2	73	4.12548	1.09222
pentyl_10mms_0g_run1	2	74	4.12661	1.10039
pentyl_10mms_0g_run1	2	75	4.13108	1.07326
pentyl_10mms_0g_run1	2	76	4.13221	1.06819
pentyl_10mms_0g_run1	2	77	4.13335	1.09638
pentyl_10mms_0g_run1	2	78	4.13448	1.08878
pentyl_10mms_0g_run1	2	79	4.13561	1.08388
pentyl_10mms_0g_run1	2	80	4.14005	1.11129
pentyl_10mms_0g_run1	2	81	4.14115	1.08425
pentyl_10mms_0g_run1	2	82	4.14225	1.09775
pentyl_10mms_0g_run1	2	83	4.14335	1.07808
pentyl_10mms_0g_run1	2	84	4.14445	1.08282
pentyl_10mms_0g_run1	2	85	4.14907	1.06376
pentyl_10mms_0g_run1	2	86	4.1502	1.07896
pentyl_10mms_0g_run1	2	87	4.15133	1.06335
pentyl_10mms_0g_run1	2	88	4.15247	1.08856
pentyl_10mms_0g_run1	2	89	4.1536	1.0762
pentyl_10mms_0g_run1	2	90	4.15808	1.0829
pentyl_10mms_0g_run1	2	91	4.15921	1.08545
pentyl_10mms_0g_run1	2	92	4.16035	1.07398
pentyl_10mms_0g_run1	2	93	4.16148	1.07013
pentyl_10mms_0g_run1	2	94	4.16262	1.09179
pentyl_10mms_0g_run1	2	95	4.16708	1.06378
pentyl_10mms_0g_run1	2	96	4.16821	1.0828
pentyl_10mms_0g_run1	2	97	4.16934	1.08045
pentyl_10mms_0g_run1	2	98	4.17048	1.08586
pentyl_10mms_0g_run1	2	99	4.17161	1.07248
pentyl_10mms_0g_run1	2	100	4.17608	1.08341
pentyl_10mms_0g_run1	2	101	4.17721	1.06466
pentyl_10mms_0g_run1	2	102	4.17835	1.07351
pentyl_10mms_0g_run1	2	103	4.17948	1.07598
pentyl_10mms_0g_run1	2	104	4.18061	1.05635
pentyl_10mms_0g_run1	2	105	4.18509	1.06525
pentyl_10mms_0g_run1	2	106	4.18622	1.08909
pentyl_10mms_0g_run1	2	107	4.18735	1.0773
pentyl_10mms_0g_run1	2	108	4.18849	1.06301
pentyl_10mms_0g_run1	2	109	4.18962	1.09044
pentyl_10mms_0g_run1	2	110	4.19408	1.06225
pentyl_10mms_0g_run1	2	111	4.19521	1.08302
pentyl_10mms_0g_run1	2	112	4.19635	1.05708
pentyl_10mms_0g_run1	2	113	4.19748	1.06215
pentyl_10mms_0g_run1	2	114	4.19861	1.06668
pentyl_10mms_0g_run1	2	115	4.20308	1.08284
pentyl_10mms_0g_run1	2	116	4.20421	1.07277
pentyl_10mms_0g_run1	2	117	4.20534	1.06519
pentyl_10mms_0g_run1	2	118	4.20648	1.10018
pentyl_10mms_0g_run1	2	119	4.20761	1.07759
pentyl_10mms_0g_run1	2	120	4.21208	1.06709
pentyl_10mms_0g_run1	2	121	4.21321	1.0596
pentyl_10mms_0g_run1	2	122	4.21435	1.07589
pentyl_10mms_0g_run1	2	123	4.21548	1.03911
pentyl_10mms_0g_run1	2	124	4.21662	1.07692
pentyl_10mms_0g_run1	2	125	4.22109	1.06037
pentyl_10mms_0g_run1	2	126	4.22222	1.08846
pentyl_10mms_0g_run1	2	127	4.22335	1.09189
pentyl_10mms_0g_run1	2	128	4.22448	1.07316
pentyl_10mms_0g_run1	2	129	4.22562	1.0924
pentyl_10mms_0g_run1	2	130	4.23009	1.07616
pentyl_10mms_0g_run1	2	131	4.23122	1.0654
pentyl_10mms_0g_run1	2	132	4.23236	1.03807
pentyl_10mms_0g_run1	2	133	4.23349	1.08102
pentyl_10mms_0g_run1	2	134	4.23462	1.06005
pentyl_10mms_0g_run1	2	135	4.23908	1.08388
pentyl_10mms_0g_run1	2	136	4.24021	1.07414
pentyl_10mms_0g_run1	2	137	4.24135	1.07398
pentyl_10mms_0g_run1	2	138	4.24248	1.08376
pentyl_10mms_0g_run1	2	139	4.24361	1.04699
pentyl_10mms_0g_run1	2	140	4.24809	1.04732
pentyl_10mms_0g_run1	2	141	4.24922	1.04534
pentyl_10mms_0g_run1	2	142	4.25035	1.06785
pentyl_10mms_0g_run1	2	143	4.25149	1.04818
pentyl_10mms_0g_run1	2	144	4.25262	1.07389
pentyl_10mms_0g_run1	2	145	4.25708	1.07694
pentyl_10mms_0g_run1	2	146	4.25821	1.0837
pentyl_10mms_0g_run1	2	147	4.25935	1.06505
pentyl_10mms_0g_run1	2	148	4.26048	1.05333
pentyl_10mms_0g_run1	2	149	4.26161	1.07532
pentyl_10mms_0g_run1	2	150	4.26609	1.0675
pentyl_10mms_0g_run1	2	151	4.26722	1.05202
pentyl_10mms_0g_run1	2	152	4.26835	1.05151
pentyl_10mms_0g_run1	2	153	4.26948	1.07222
pentyl_10mms_0g_run1	2	154	4.27061	1.07594
pentyl_10mms_0g_run1	2	155	4.27508	1.05488
pentyl_10mms_0g_run1	2	156	4.27622	1.05263
pentyl_10mms_0g_run1	2	157	4.27735	1.06468
pentyl_10mms_0g_run1	2	158	4.27848	1.06995
pentyl_10mms_0g_run1	2	159	4.27962	1.04757
pentyl_10mms_0g_run1	2	160	4.28405	1.0434
pentyl_10mms_0g_run1	2	161	4.28515	1.06946
pentyl_10mms_0g_run1	2	162	4.28626	1.06621
pentyl_10mms_0g_run1	2	163	4.28736	1.05547
pentyl_10mms_0g_run1	2	164	4.28846	1.07641
pentyl_10mms_0g_run1	2	165	4.29307	1.05523
pentyl_10mms_0g_run1	2	166	4.29421	1.06822
pentyl_10mms_0g_run1	2	167	4.29534	1.06272
pentyl_10mms_0g_run1	2	168	4.29647	1.0513
pentyl_10mms_0g_run1	2	169	4.29761	1.07102
pentyl_10mms_0g_run1	2	170	4.30209	1.07988
pentyl_10mms_0g_run1	2	171	4.30322	1.0558
pentyl_10mms_0g_run1	2	172	4.30436	1.07063
pentyl_10mms_0g_run1	2	173	4.30549	1.06599
pentyl_10mms_0g_run1	2	174	4.30663	1.10359
pentyl_10mms_0g_run1	2	175	4.31108	1.07197
pentyl_10mms_0g_run1	2	176	4.31221	1.04895
pentyl_10mms_0g_run1	2	177	4.31335	1.07183
pentyl_10mms_0g_run1	2	178	4.31448	1.06329
pentyl_10mms_0g_run1	2	179	4.31561	1.02463
pentyl_10mms_0g_run1	2	180	4.32008	1.04681
pentyl_10mms_0g_run1	2	181	4.32122	1.07161
pentyl_10mms_0g_run1	2	182	4.32235	1.06434
pentyl_10mms_0g_run1	2	183	4.32349	1.07173
pentyl_10mms_0g_run1	2	184	4.32462	1.07302
pentyl_10mms_0g_run1	2	185	4.32909	1.07114
pentyl_10mms_0g_run1	2	186	4.33023	1.05092
pentyl_10mms_0g_run1	2	187	4.33136	1.05941
pentyl_10mms_0g_run1	2	188	4.3325	1.03705
pentyl_10mms_0g_run1	2	189	4.33363	1.04089
pentyl_10mms_0g_run1	2	190	4.33809	1.06905
pentyl_10mms_0g_run1	2	191	4.33922	1.05349
pentyl_10mms_0g_run1	2	192	4.34035	1.07972
pentyl_10mms_0g_run1	2	193	4.34149	1.06666
pentyl_10mms_0g_run1	2	194	4.34262	1.06299
pentyl_10mms_0g_run1	2	195	4.34709	1.04661
pentyl_10mms_0g_run1	2	196	4.34822	1.03619
pentyl_10mms_0g_run1	2	197	4.34936	1.04015
pentyl_10mms_0g_run1	2	198	4.3505	1.05653
pentyl_10mms_0g_run1	2	199	4.35163	1.05224
pentyl_10mms_0g_run1	2	200	4.35609	1.05855
pentyl_10mms_0g_run1	2	201	4.35722	1.08766
pentyl_10mms_0g_run1	2	202	4.35835	1.0367
pentyl_10mms_0g_run1	2	203	4.35948	1.06164
pentyl_10mms_0g_run1	2	204	4.36061	1.06074
pentyl_10mms_0g_run1	2	205	4.36509	1.04146
pentyl_10mms_0g_run1	2	206	4.36623	1.04283
pentyl_10mms_0g_run1	2	207	4.36736	1.05204
pentyl_10mms_0g_run1	2	208	4.36849	1.05529
pentyl_10mms_0g_run1	2	209	4.36963	1.05757
pentyl_10mms_0g_run1	2	210	4.37409	1.07782
pentyl_10mms_0g_run1	2	211	4.37522	1.05065
pentyl_10mms_0g_run1	2	212	4.37636	1.06619
pentyl_10mms_0g_run1	2	213	4.37749	1.0387
pentyl_10mms_0g_run1	2	214	4.37862	1.06601
pentyl_10mms_0g_run1	2	215	4.38309	1.03776
pentyl_10mms_0g_run1	2	216	4.38422	1.05851
pentyl_10mms_0g_run1	2	217	4.38535	1.05183
pentyl_10mms_0g_run1	2	218	4.38649	1.05819
pentyl_10mms_0g_run1	2	219	4.38762	1.06156
pentyl_10mms_0g_run1	2	220	4.39209	1.0779
pentyl_10mms_0g_run1	2	221	4.39323	1.04755
pentyl_10mms_0g_run1	2	222	4.39436	1.04893
pentyl_10mms_0g_run1	2	223	4.39549	1.05639
pentyl_10mms_0g_run1	2	224	4.39663	1.04256
pentyl_10mms_0g_run1	2	225	4.40109	1.04987
pentyl_10mms_0g_run1	2	226	4.40223	1.05269
pentyl_10mms_0g_run1	2	227	4.40336	1.0607
pentyl_10mms_0g_run1	2	228	4.40449	1.04595
pentyl_10mms_0g_run1	2	229	4.40563	1.06683
pentyl_10mms_0g_run1	2	230	4.41009	1.05218
pentyl_10mms_0g_run1	2	231	4.41123	1.06791
pentyl_10mms_0g_run1	2	232	4.41236	1.05512
pentyl_10mms_0g_run1	2	233	4.41349	1.04916
pentyl_10mms_0g_run1	2	234	4.41462	1.0667
pentyl_10mms_0g_run1	2	235	4.41909	1.05302
pentyl_10mms_0g_run1	2	236	4.42022	1.06154
pentyl_10mms_0g_run1	2	237	4.42135	1.04654
pentyl_10mms_0g_run1	2	238	4.42248	1.06417
pentyl_10mms_0g_run1	2	239	4.42362	1.07099
pentyl_10mms_0g_run1	2	240	4.42806	1.04904
pentyl_10mms_0g_run1	2	241	4.42916	1.05939
pentyl_10mms_0g_run1	2	242	4.43026	1.05075
pentyl_10mms_0g_run1	2	243	4.43137	1.05721
pentyl_10mms_0g_run1	2	244	4.43247	1.02448
pentyl_10mms_0g_run1	2	245	4.43708	1.02739
pentyl_10mms_0g_run1	2	246	4.43821	0.985194
pentyl_10mms_0g_run1	2	247	4.43935	0.973733
pentyl_10mms_0g_run1	2	248	4.44048	0.969227
pentyl_10mms_0g_run1	2	249	4.44162	0.916545
pentyl_10mms_0g_run1	2	250	4.4461	0.861649
pentyl_10mms_0g_run1	2	251	4.44723	0.867467
pentyl_10mms_0g_run1	2	252	4.44836	0.825306
pentyl_10mms_0g_run1	2	253	4.44949	0.854243
pentyl_10mms_0g_run1	2	254	4.45063	0.849404
pentyl_10mms_0g_run1	2	255	4.45509	0.890605
pentyl_10mms_0g_run1	2	256	4.45623	0.878145
pentyl_10mms_0g_run1	2	257	4.45736	0.899245
pentyl_10mms_0g_run1	2	258	4.4585	0.872659
pentyl_10mms_0g_run1	2	259	4.45963	0.863001
pentyl_10mms_0g_run1	2	260	4.46409	0.848307
pentyl_10mms_0g_run1	2	261	4.46523	0.81935
pentyl_10mms_0g_run1	2	262	4.46636	0.842978
pentyl_10mms_0g_run1	2	263	4.46749	0.833926
pentyl_10mms_0g_run1	2	264	4.46863	0.842233
pentyl_10mms_0g_run1	2	265	4.4731	0.848659
pentyl_10mms_0g_run1	2	266	4.47423	0.880182
pentyl_10mms_0g_run1	2	267	4.47537	0.842351
pentyl_10mms_0g_run1	2	268	4.4765	0.851402
pentyl_10mms_0g_run1	3	1	4.84325	0.73828
pentyl_10mms_0g_run1	3	2	4.84438	0.72531
pentyl_10mms_0g_run1	3	3	4.84552	0.726486
pentyl_10mms_0g_run1	3	4	4.84665	0.740122
pentyl_10mms_0g_run1	3	5	4.85111	0.715064
pentyl_10mms_0g_run1	3	6	4.85225	0.735126
pentyl_10mms_0g_run1	3	7	4.85338	0.722274
pentyl_10mms_0g_run1	3	8	4.85451	0.733304
pentyl_10mms_0g_run1	3	9	4.85565	0.735655
pentyl_10mms_0g_run1	3	10	4.86008	0.7354
pentyl_10mms_0g_run1	3	11	4.86118	0.740572
pentyl_10mms_0g_run1	3	12	4.86229	0.721902
pentyl_10mms_0g_run1	3	13	4.86339	0.735498
pentyl_10mms_0g_run1	3	14	4.8645	0.712204
pentyl_10mms_0g_run1	3	15	4.8691	0.735537
pentyl_10mms_0g_run1	3	16	4.87024	0.719551
pentyl_10mms_0g_run1	3	17	4.87137	0.731717
pentyl_10mms_0g_run1	3	18	4.87251	0.73399
pentyl_10mms_0g_run1	3	19	4.87364	0.734205
pentyl_10mms_0g_run1	3	20	4.87811	0.710617
pentyl_10mms_0g_run1	3	21	4.87925	0.734048
pentyl_10mms_0g_run1	3	22	4.88038	0.71624
pentyl_10mms_0g_run1	3	23	4.88152	0.714633
pentyl_10mms_0g_run1	3	24	4.88265	0.711557
pentyl_10mms_0g_run1	3	25	4.88711	0.750212
pentyl_10mms_0g_run1	3	26	4.88825	0.766257
pentyl_10mms_0g_run1	3	27	4.88938	0.768118
pentyl_10mms_0g_run1	3	28	4.89051	0.831008
pentyl_10mms_0g_run1	3	29	4.89164	0.856242
pentyl_10mms_0g_run1	3	30	4.89611	0.979513
pentyl_10mms_0g_run1	3	31	4.89725	0.990896
pentyl_10mms_0g_run1	3	32	4.89838	1.00377
pentyl_10mms_0g_run1	3	33	4.89952	1.03286
pentyl_10mms_0g_run1	3	34	4.90065	1.04889
pentyl_10mms_0g_run1	3	35	4.90512	1.08866
pentyl_10mms_0g_run1	3	36	4.90625	1.12294
pentyl_10mms_0g_run1	3	37	4.90738	1.1307
pentyl_10mms_0g_run1	3	38	4.90852	1.09773
pentyl_10mms_0g_run1	3	39	4.90965	1.14263
pentyl_10mms_0g_run1	3	40	4.91412	1.16083
pentyl_10mms_0g_run1	3	41	4.91525	1.14199
pentyl_10mms_0g_run1	3	42	4.91638	1.14114
pentyl_10mms_0g_run1	3	43	4.91752	1.16089
pentyl_10mms_0g_run1	3	44	4.91865	1.14924
pentyl_10mms_0g_run1	3	45	4.92312	1.1403
pentyl_10mms_0g_run1	3	46	4.92425	1.1373
pentyl_10mms_0g_run1	3	47	4.92538	1.12616
pentyl_10mms_0g_run1	3	48	4.92652	1.13576
pentyl_10mms_0g_run1	3	49	4.92765	1.09744
pentyl_10mms_0g_run1	3	50	4.93212	1.1009
pentyl_10mms_0g_run1	3	51	4.93325	1.101
pentyl_10mms_0g_run1	3	52	4.93439	1.12187
pentyl_10mms_0g_run1	3	53	4.93552	1.09064
pentyl_10mms_0g_run1	3	54	4.93665	1.10958
pentyl_10mms_0g_run1	3	55	4.94112	1.09908
pentyl_10mms_0g_run1	3	56	4.94225	1.12147
pentyl_10mms_0g_run1	3	57	4.94339	1.07694
pentyl_10mms_0g_run1	3	58	4.94452	1.09207
pentyl_10mms_0g_run1	3	59	4.94565	1.09832
pentyl_10mms_0g_run1	3	60	4.95012	1.10729
pentyl_10mms_0g_run1	3	61	4.95125	1.08086
pentyl_10mms_0g_run1	3	62	4.95238	1.07291
pentyl_10mms_0g_run1	3	63	4.95351	1.09471
pentyl_10mms_0g_run1	3	64	4.95465	1.0933
pentyl_10mms_0g_run1	3	65	4.95911	1.1018
pentyl_10mms_0g_run1	3	66	4.96025	1.07349
pentyl_10mms_0g_run1	3	67	4.96138	1.07204
pentyl_10mms_0g_run1	3	68	4.96251	1.09587
pentyl_10mms_0g_run1	3	69	4.96364	1.06199
pentyl_10mms_0g_run1	3	70	4.96812	1.06152
pentyl_10mms_0g_run1	3	71	4.96925	1.08198
pentyl_10mms_0g_run1	3	72	4.97038	1.09642
pentyl_10mms_0g_run1	3	73	4.97152	1.06323
pentyl_10mms_0g_run1	3	74	4.97265	1.08539
pentyl_10mms_0g_run1	3	75	4.97712	1.08049
pentyl_10mms_0g_run1	3	76	4.97826	1.08268
pentyl_10mms_0g_run1	3	77	4.97939	1.06172
pentyl_10mms_0g_run1	3	78	4.98052	1.07779
pentyl_10mms_0g_run1	3	79	4.98165	1.05718
pentyl_10mms_0g_run1	3	80	4.98612	1.09471
pentyl_10mms_0g_run1	3	81	4.98725	1.05906
pentyl_10mms_0g_run1	3	82	4.98839	1.07359
pentyl_10mms_0g_run1	3	83	4.98952	1.08308
pentyl_10mms_0g_run1	3	84	4.99065	1.08294
pentyl_10mms_0g_run1	3	85	4.99512	1.07469
pentyl_10mms_0g_run1	3	86	4.99625	1.05659
pentyl_10mms_0g_run1	3	87	4.99738	1.0744
pentyl_10mms_0g_run1	3	88	4.99851	1.0454
pentyl_10mms_0g_run1	3	89	4.99965	1.04658
pentyl_10mms_0g_run1	3	90	5.00409	1.0629
pentyl_10mms_0g_run1	3	91	5.00519	1.06738
pentyl_10mms_0g_run1	3	92	5.00629	1.07453
pentyl_10mms_0g_run1	3	93	5.00739	1.07687
pentyl_10mms_0g_run1	3	94	5.00849	1.05514
pentyl_10mms_0g_run1	3	95	5.01311	1.05195
pentyl_10mms_0g_run1	3	96	5.01424	1.06795
pentyl_10mms_0g_run1	3	97	5.01537	1.04417
pentyl_10mms_0g_run1	3	98	5.0165	1.04131
pentyl_10mms_0g_run1	3	99	5.01764	1.07524
pentyl_10mms_0g_run1	3	100	5.02212	1.07436
pentyl_10mms_0g_run1	3	101	5.02325	1.05001
pentyl_10mms_0g_run1	3	102	5.02439	1.08694
pentyl_10mms_0g_run1	3	103	5.02552	1.07722
pentyl_10mms_0g_run1	3	104	5.02665	1.05316
pentyl_10mms_0g_run1	3	105	5.03112	1.03937
pentyl_10mms_0g_run1	3	106	5.03226	1.04027
pentyl_10mms_0g_run1	3	107	5.03339	1.06429
pentyl_10mms_0g_run1	3	108	5.03452	1.05578
pentyl_10mms_0g_run1	3	109	5.03566	1.06141
pentyl_10mms_0g_run1	3	110	5.04012	1.08361
pentyl_10mms_0g_run1	3	111	5.04125	1.08588
pentyl_10mms_0g_run1	3	112	5.04239	1.06623
pentyl_10mms_0g_run1	3	113	5.04352	1.05861
pentyl_10mms_0g_run1	3	114	5.04465	1.0697
pentyl_10mms_0g_run1	3	115	5.04913	1.04215
pentyl_10mms_0g_run1	3	116	5.05026	1.06801
pentyl_10mms_0g_run1	3	117	5.05139	1.0472
pentyl_10mms_0g_run1	3	118	5.05252	1.06893
pentyl_10mms_0g_run1	3	119	5.05365	1.05018
pentyl_10mms_0g_run1	3	120	5.05812	1.07869
pentyl_10mms_0g_run1	3	121	5.05925	1.04785
pentyl_10mms_0g_run1	3	122	5.06038	1.06691
pentyl_10mms_0g_run1	3	123	5.06151	1.0601
pentyl_10mms_0g_run1	3	124	5.06265	1.05569
pentyl_10mms_0g_run1	3	125	5.06712	1.03396
pentyl_10mms_0g_run1	3	126	5.06825	1.06139
pentyl_10mms_0g_run1	3	127	5.06939	1.05128
pentyl_10mms_0g_run1	3	128	5.07053	1.06378
pentyl_10mms_0g_run1	3	129	5.07166	1.05414
pentyl_10mms_0g_run1	3	130	5.07612	1.06627
pentyl_10mms_0g_run1	3	131	5.07726	1.05306
pentyl_10mms_0g_run1	3	132	5.07839	1.04942
pentyl_10mms_0g_run1	3	133	5.07952	1.05531
pentyl_10mms_0g_run1	3	134	5.08066	1.03937
pentyl_10mms_0g_run1	3	135	5.08513	1.0511
pentyl_10mms_0g_run1	3	136	5.08626	1.04805
pentyl_10mms_0g_run1	3	137	5.08739	1.05902
pentyl_10mms_0g_run1	3	138	5.08853	1.04474
pentyl_10mms_0g_run1	3	139	5.08966	1.06219
pentyl_10mms_0g_run1	3	140	5.09413	1.0443
pentyl_10mms_0g_run1	3	141	5.09526	1.05567
pentyl_10mms_0g_run1	3	142	5.09639	1.04907
pentyl_10mms_0g_run1	3	143	5.09753	1.04942
pentyl_10mms_0g_run1	3	144	5.09866	1.05177
pentyl_10mms_0g_run1	3	145	5.10312	1.04734
pentyl_10mms_0g_run1	3	146	5.10425	1.06227
pentyl_10mms_0g_run1	3	147	5.10538	1.05126
pentyl_10mms_0g_run1	3	148	5.10652	1.06076
pentyl_10mms_0g_run1	3	149	5.10765	1.0762
pentyl_10mms_0g_run1	3	150	5.11213	1.05369
pentyl_10mms_0g_run1	3	151	5.11326	1.04381
pentyl_10mms_0g_run1	3	152	5.11439	1.05647
pentyl_10mms_0g_run1	3	153	5.11553	1.02898
pentyl_10mms_0g_run1	3	154	5.11666	1.04123
pentyl_10mms_0g_run1	3	155	5.12112	1.05169
pentyl_10mms_0g_run1	3	156	5.12225	1.04695
pentyl_10mms_0g_run1	3	157	5.12339	1.0821
pentyl_10mms_0g_run1	3	158	5.12452	1.06654
pentyl_10mms_0g_run1	3	159	5.12565	1.05792
pentyl_10mms_0g_run1	3	160	5.13013	1.04474
pentyl_10mms_0g_run1	3	161	5.13126	1.05281
pentyl_10mms_0g_run1	3	162	5.13239	1.02076
pentyl_10mms_0g_run1	3	163	5.13353	1.06674
pentyl_10mms_0g_run1	3	164	5.13466	1.05197
pentyl_10mms_0g_run1	3	165	5.13912	1.0589
pentyl_10mms_0g_run1	3	166	5.14026	1.07199
pentyl_10mms_0g_run1	3	167	5.14139	1.05285
pentyl_10mms_0g_run1	3	168	5.14252	1.06684
pentyl_10mms_0g_run1	3	169	5.14365	1.0522
pentyl_10mms_0g_run1	3	170	5.14809	1.04213
pentyl_10mms_0g_run1	3	171	5.14919	1.033
pentyl_10mms_0g_run1	3	172	5.15029	1.06313
pentyl_10mms_0g_run1	3	173	5.15139	1.04519
pentyl_10mms_0g_run1	3	174	5.1525	1.03888
pentyl_10mms_0g_run1	3	175	5.15711	1.07773
pentyl_10mms_0g_run1	3	176	5.15824	1.05075
pentyl_10mms_0g_run1	3	177	5.15938	1.05547
pentyl_10mms_0g_run1	3	178	5.16052	1.03864
pentyl_10mms_0g_run1	3	179	5.16165	1.04626
pentyl_10mms_0g_run1	3	180	5.16613	1.03584
pentyl_10mms_0g_run1	3	181	5.16726	1.02904
pentyl_10mms_0g_run1	3	182	5.1684	1.03355
pentyl_10mms_0g_run1	3	183	5.16953	1.06785
pentyl_10mms_0g_run1	3	184	5.17066	1.04848
pentyl_10mms_0g_run1	3	185	5.17512	1.04969
pentyl_10mms_0g_run1	3	186	5.17626	1.04474
pentyl_10mms_0g_run1	3	187	5.17739	1.03894
pentyl_10mms_0g_run1	3	188	5.17853	1.0581
pentyl_10mms_0g_run1	3	189	5.17966	1.02826
pentyl_10mms_0g_run1	3	190	5.18413	1.03153
pentyl_10mms_0g_run1	3	191	5.18526	1.04393
pentyl_10mms_0g_run1	3	192	5.18639	1.06429
pentyl_10mms_0g_run1	3	193	5.18753	1.03
pentyl_10mms_0g_run1	3	194	5.18866	1.05537
pentyl_10mms_0g_run1	3	195	5.19313	1.04231
pentyl_10mms_0g_run1	3	196	5.19426	1.05557
pentyl_10mms_0g_run1	3	197	5.1954	1.02857
pentyl_10mms_0g_run1	3	198	5.19653	1.04693
pentyl_10mms_0g_run1	3	199	5.19766	1.05165
pentyl_10mms_0g_run1	3	200	5.20213	1.05657
pentyl_10mms_0g_run1	3	201	5.20326	1.0515
pentyl_10mms_0g_run1	3	202	5.20439	1.03819
pentyl_10mms_0g_run1	3	203	5.20552	1.05202
pentyl_10mms_0g_run1	3	204	5.20665	1.06787
pentyl_10mms_0g_run1	3	205	5.21113	1.03516
pentyl_10mms_0g_run1	3	206	5.21226	1.02977
pentyl_10mms_0g_run1	3	207	5.2134	1.05232
pentyl_10mms_0g_run1	3	208	5.21453	1.03224
pentyl_10mms_0g_run1	3	209	5.21566	1.00291
pentyl_10mms_0g_run1	3	210	5.22013	1.02842
pentyl_10mms_0g_run1	3	211	5.22126	1.04738
pentyl_10mms_0g_run1	3	212	5.22239	1.05669
pentyl_10mms_0g_run1	3	213	5.22352	1.05306
pentyl_10mms_0g_run1	3	214	5.22466	1.05581
pentyl_10mms_0g_run1	3	215	5.22913	1.0502
pentyl_10mms_0g_run1	3	216	5.23027	1.0417
pentyl_10mms_0g_run1	3	217	5.2314	1.02505
pentyl_10mms_0g_run1	3	218	5.23253	1.02881
pentyl_10mms_0g_run1	3	219	5.23367	1.0454
pentyl_10mms_0g_run1	3	220	5.23813	1.05539
pentyl_10mms_0g_run1	3	221	5.23926	1.03183
pentyl_10mms_0g_run1	3	222	5.24039	1.05026
pentyl_10mms_0g_run1	3	223	5.24153	1.06127
pentyl_10mms_0g_run1	3	224	5.24266	1.03522
pentyl_10mms_0g_run1	3	225	5.24713	1.039
pentyl_10mms_0g_run1	3	226	5.24826	1.02656
pentyl_10mms_0g_run1	3	227	5.24939	1.03514
pentyl_10mms_0g_run1	3	228	5.25053	1.02802
pentyl_10mms_0g_run1	3	229	5.25166	1.03042
pentyl_10mms_0g_run1	3	230	5.25613	1.03331
pentyl_10mms_0g_run1	3	231	5.25726	1.07297
pentyl_10mms_0g_run1	3	232	5.2584	1.04609
pentyl_10mms_0g_run1	3	233	5.25953	1.04605
pentyl_10mms_0g_run1	3	234	5.26067	1.04113
pentyl_10mms_0g_run1	3	235	5.26513	1.01574
pentyl_10mms_0g_run1	3	236	5.26627	1.02321
pentyl_10mms_0g_run1	3	237	5.2674	1.02652
pentyl_10mms_0g_run1	3	238	5.26853	1.04648
pentyl_10mms_0g_run1	3	239	5.26966	1.03079
pentyl_10mms_0g_run1	3	240	5.27413	1.064
pentyl_10mms_0g_run1	3	241	5.27527	1.00933
pentyl_10mms_0g_run1	3	242	5.2764	1.04965
pentyl_10mms_0g_run1	3	243	5.27753	1.0234
pentyl_10mms_0g_run1	3	244	5.27867	1.04107
pentyl_10mms_0g_run1	3	245	5.28313	1.02009
pentyl_10mms_0g_run1	3	246	5.28426	1.04002
pentyl_10mms_0g_run1	3	247	5.2854	1.03108
pentyl_10mms_0g_run1	3	248	5.28653	1.02229
pentyl_10mms_0g_run1	3	249	5.28767	1.01617
pentyl_10mms_0g_run1	3	250	5.2921	0.954302
pentyl_10mms_0g_run1	3	251	5.2932	0.906674
pentyl_10mms_0g_run1	3	252	5.29431	0.896604
pentyl_10mms_0g_run1	3	253	5.29541	0.884751
pentyl_10mms_0g_run1	3	254	5.29652	0.863592
pentyl_10mms_0g_run1	3	255	5.30112	0.846997
pentyl_10mms_0g_run1	3	256	5.30225	0.857851
pentyl_10mms_0g_run1	3	257	5.30338	0.852836
pentyl_10mms_0g_run1	3	258	5.30452	0.871017
pentyl_10mms_0g_run1	3	259	5.30565	0.866158
pentyl_10mms_0g_run1	3	260	5.31013	0.856989
pentyl_10mms_0g_run1	3	261	5.31127	0.875543
pentyl_10mms_0g_run1	3	262	5.3124	0.856754
pentyl_10mms_0g_run1	3	263	5.31353	0.835321
pentyl_10mms_0g_run1	3	264	5.31467	0.848878
pentyl_10mms_0g_run1	3	265	5.31913	0.827288
pentyl_10mms_0g_run1	3	266	5.32026	0.848291
pentyl_10mms_0g_run1	3	267	5.3214	0.834302
pentyl_10mms_0g_run1	3	268	5.32253	0.845528
pentyl_10mms_0g_run2	1	1	3.21387	0.696179
pentyl_10mms_0g_run2	1	2	3.215	0.699627
pentyl_10mms_0g_run2	1	3	3.21614	0.6846
pentyl_10mms_0g_run2	1	4	3.21727	0.715751
pentyl_10mms_0g_run2	1	5	3.22173	0.697295
pentyl_10mms_0g_run2	1	6	3.22286	0.713439
pentyl_10mms_0g_run2	1	7	3.224	0.730876
pentyl_10mms_0g_run2	1	8	3.22513	0.71293
pentyl_10mms_0g_run2	1	9	3.22627	0.712753
pentyl_10mms_0g_run2	1	10	3.23073	0.697021
pentyl_10mms_0g_run2	1	11	3.23186	0.693122
pentyl_10mms_0g_run2	1	12	3.233	0.696531
pentyl_10mms_0g_run2	1	13	3.23413	0.699823
pentyl_10mms_0g_run2	1	14	3.23526	0.705818
pentyl_10mms_0g_run2	1	15	3.23973	0.744551
pentyl_10mms_0g_run2	1	16	3.24087	0.708835
pentyl_10mms_0g_run2	1	17	3.242	0.721922
pentyl_10mms_0g_run2	1	18	3.24313	0.706523
pentyl_10mms_0g_run2	1	19	3.24426	0.703115
pentyl_10mms_0g_run2	1	20	3.24874	0.734246
pentyl_10mms_0g_run2	1	21	3.24987	0.816355
pentyl_10mms_0g_run2	1	22	3.25101	0.829913
pentyl_10mms_0g_run2	1	23	3.25214	0.860437
pentyl_10mms_0g_run2	1	24	3.25328	0.910572
pentyl_10mms_0g_run2	1	25	3.25773	1.03322
pentyl_10mms_0g_run2	1	26	3.25887	1.06637
pentyl_10mms_0g_run2	1	27	3.26	1.05455
pentyl_10mms_0g_run2	1	28	3.26114	1.08059
pentyl_10mms_0g_run2	1	29	3.26227	1.09113
pentyl_10mms_0g_run2	1	30	3.26673	1.12085
pentyl_10mms_0g_run2	1	31	3.26787	1.13676
pentyl_10mms_0g_run2	1	32	3.269	1.15809
pentyl_10mms_0g_run2	1	33	3.27014	1.17438
pentyl_10mms_0g_run2	1	34	3.27127	1.15804
pentyl_10mms_0g_run2	1	35	3.2757	1.19262
pentyl_10mms_0g_run2	1	36	3.2768	1.19026
pentyl_10mms_0g_run2	1	37	3.2779	1.17669
pentyl_10mms_0g_run2	1	38	3.27901	1.18186
pentyl_10mms_0g_run2	1	39	3.28011	1.16738
pentyl_10mms_0g_run2	1	40	3.28472	1.17606
pentyl_10mms_0g_run2	1	41	3.28586	1.156
pentyl_10mms_0g_run2	1	42	3.28699	1.17955
pentyl_10mms_0g_run2	1	43	3.28813	1.16513
pentyl_10mms_0g_run2	1	44	3.28926	1.18207
pentyl_10mms_0g_run2	1	45	3.29374	1.17012
pentyl_10mms_0g_run2	1	46	3.29487	1.15708
pentyl_10mms_0g_run2	1	47	3.296	1.15087
pentyl_10mms_0g_run2	1	48	3.29714	1.16815
pentyl_10mms_0g_run2	1	49	3.29827	1.13357
pentyl_10mms_0g_run2	1	50	3.30273	1.15263
pentyl_10mms_0g_run2	1	51	3.30386	1.14058
pentyl_10mms_0g_run2	1	52	3.305	1.14934
pentyl_10mms_0g_run2	1	53	3.30613	1.15388
pentyl_10mms_0g_run2	1	54	3.30727	1.14963
pentyl_10mms_0g_run2	1	55	3.31173	1.1388
pentyl_10mms_0g_run2	1	56	3.31287	1.13658
pentyl_10mms_0g_run2	1	57	3.314	1.14407
pentyl_10mms_0g_run2	1	58	3.31514	1.10069
pentyl_10mms_0g_run2	1	59	3.31627	1.14757
pentyl_10mms_0g_run2	1	60	3.32074	1.14281
pentyl_10mms_0g_run2	1	61	3.32187	1.15533
pentyl_10mms_0g_run2	1	62	3.32301	1.14607
pentyl_10mms_0g_run2	1	63	3.32414	1.16131
pentyl_10mms_0g_run2	1	64	3.32528	1.14689
pentyl_10mms_0g_run2	1	65	3.32974	1.14836
pentyl_10mms_0g_run2	1	66	3.33087	1.11826
pentyl_10mms_0g_run2	1	67	3.332	1.106
pentyl_10mms_0g_run2	1	68	3.33314	1.15884
pentyl_10mms_0g_run2	1	69	3.33427	1.11186
pentyl_10mms_0g_run2	1	70	3.33874	1.127
pentyl_10mms_0g_run2	1	71	3.33987	1.13562
pentyl_10mms_0g_run2	1	72	3.341	1.15026
pentyl_10mms_0g_run2	1	73	3.34214	1.12687
pentyl_10mms_0g_run2	1	74	3.34327	1.11348
pentyl_10mms_0g_run2	1	75	3.34774	1.11219
pentyl_10mms_0g_run2	1	76	3.34887	1.10953
pentyl_10mms_0g_run2	1	77	3.35	1.12144
pentyl_10mms_0g_run2	1	78	3.35114	1.10845
pentyl_10mms_0g_run2	1	79	3.35227	1.13844
pentyl_10mms_0g_run2	1	80	3.35674	1.15233
pentyl_10mms_0g_run2	1	81	3.35787	1.13862
pentyl_10mms_0g_run2	1	82	3.359	1.11307
pentyl_10mms_0g_run2	1	83	3.36014	1.12737
pentyl_10mms_0g_run2	1	84	3.36127	1.13092
pentyl_10mms_0g_run2	1	85	3.36574	1.11405
pentyl_10mms_0g_run2	1	86	3.36687	1.09076
pentyl_10mms_0g_run2	1	87	3.36801	1.12696
pentyl_10mms_0g_run2	1	88	3.36914	1.13905
pentyl_10mms_0g_run2	1	89	3.37027	1.11031
pentyl_10mms_0g_run2	1	90	3.37474	1.10241
pentyl_10mms_0g_run2	1	91	3.37587	1.11211
pentyl_10mms_0g_run2	1	92	3.377	1.12888
pentyl_10mms_0g_run2	1	93	3.37813	1.11009
pentyl_10mms_0g_run2	1	94	3.37927	1.1099
pentyl_10mms_0g_run2	1	95	3.38374	1.10479
pentyl_10mms_0g_run2	1	96	3.38488	1.12712
pentyl_10mms_0g_run2	1	97	3.38601	1.1029
pentyl_10mms_0g_run2	1	98	3.38714	1.11781
pentyl_10mms_0g_run2	1	99	3.38827	1.13229
pentyl_10mms_0g_run2	1	100	3.39274	1.13733
pentyl_10mms_0g_run2	1	101	3.39387	1.10992
pentyl_10mms_0g_run2	1	102	3.39501	1.11262
pentyl_10mms_0g_run2	1	103	3.39614	1.12879
pentyl_10mms_0g_run2	1	104	3.39727	1.11139
pentyl_10mms_0g_run2	1	105	3.40174	1.11803
pentyl_10mms_0g_run2	1	106	3.40287	1.10627
pentyl_10mms_0g_run2	1	107	3.40401	1.13411
pentyl_10mms_0g_run2	1	108	3.40514	1.11725
pentyl_10mms_0g_run2	1	109	3.40627	1.13699
pentyl_10mms_0g_run2	1	110	3.41074	1.09528
pentyl_10mms_0g_run2	1	111	3.41187	1.12156
pentyl_10mms_0g_run2	1	112	3.41301	1.11783
pentyl_10mms_0g_run2	1	113	3.41414	1.10533
pentyl_10mms_0g_run2	1	114	3.41527	1.10073
pentyl_10mms_0g_run2	1	115	3.41971	1.1319
pentyl_10mms_0g_run2	1	116	3.42081	1.11117
pentyl_10mms_0g_run2	1	117	3.42191	1.13323
pentyl_10mms_0g_run2	1	118	3.42301	1.13935
pentyl_10mms_0g_run2	1	119	3.42411	1.13976
pentyl_10mms_0g_run2	1	120	3.42873	1.12007
pentyl_10mms_0g_run2	1	121	3.42986	1.12093
pentyl_10mms_0g_run2	1	122	3.431	1.09671
pentyl_10mms_0g_run2	1	123	3.43213	1.10769
pentyl_10mms_0g_run2	1	124	3.43327	1.11168
pentyl_10mms_0g_run2	1	125	3.43774	1.11076
pentyl_10mms_0g_run2	1	126	3.43888	1.11156
pentyl_10mms_0g_run2	1	127	3.44001	1.13498
pentyl_10mms_0g_run2	1	128	3.44115	1.11819
pentyl_10mms_0g_run2	1	129	3.44228	1.12383
pentyl_10mms_0g_run2	1	130	3.44674	1.09826
pentyl_10mms_0g_run2	1	131	3.44788	1.10667
pentyl_10mms_0g_run2	1	132	3.44901	1.08835
pentyl_10mms_0g_run2	1	133	3.45014	1.10586
pentyl_10mms_0g_run2	1	134	3.45128	1.10913
pentyl_10mms_0g_run2	1	135	3.45574	1.12677
pentyl_10mms_0g_run2	1	136	3.45688	1.13121
pentyl_10mms_0g_run2	1	137	3.45801	1.11307
pentyl_10mms_0g_run2	1	138	3.45914	1.12097
pentyl_10mms_0g_run2	1	139	3.46028	1.09724
pentyl_10mms_0g_run2	1	140	3.46475	1.07691
pentyl_10mms_0g_run2	1	141	3.46588	1.10508
pentyl_10mms_0g_run2	1	142	3.46702	1.10678
pentyl_10mms_0g_run2	1	143	3.46815	1.1023
pentyl_10mms_0g_run2	1	144	3.46928	1.12681
pentyl_10mms_0g_run2	1	145	3.47374	1.12397
pentyl_10mms_0g_run2	1	146	3.47487	1.10539
pentyl_10mms_0g_run2	1	147	3.47601	1.11188
pentyl_10mms_0g_run2	1	148	3.47714	1.09787
pentyl_10mms_0g_run2	1	149	3.47827	1.11174
pentyl_10mms_0g_run2	1	150	3.48274	1.09205
pentyl_10mms_0g_run2	1	151	3.48387	1.11821
pentyl_10mms_0g_run2	1	152	3.485	1.09905
pentyl_10mms_0g_run2	1	153	3.48614	1.11107
pentyl_10mms_0g_run2	1	154	3.48727	1.1091
pentyl_10mms_0g_run2	1	155	3.49174	1.13096
pentyl_10mms_0g_run2	1	156	3.49288	1.10449
pentyl_10mms_0g_run2	1	157	3.49401	1.10792
pentyl_10mms_0g_run2	1	158	3.49514	1.10704
pentyl_10mms_0g_run2	1	159	3.49627	1.09689
pentyl_10mms_0g_run2	1	160	3.50075	1.09779
pentyl_10mms_0g_run2	1	161	3.50188	1.11499
pentyl_10mms_0g_run2	1	162	3.50301	1.1108
pentyl_10mms_0g_run2	1	163	3.50415	1.10643
pentyl_10mms_0g_run2	1	164	3.50528	1.12926
pentyl_10mms_0g_run2	1	165	3.50975	1.11523
pentyl_10mms_0g_run2	1	166	3.51088	1.11619
pentyl_10mms_0g_run2	1	167	3.51202	1.1001
pentyl_10mms_0g_run2	1	168	3.51315	1.12504
pentyl_10mms_0g_run2	1	169	3.51429	1.10196
pentyl_10mms_0g_run2	1	170	3.51874	1.11954
pentyl_10mms_0g_run2	1	171	3.51988	1.10964
pentyl_10mms_0g_run2	1	172	3.52101	1.11435
pentyl_10mms_0g_run2	1	173	3.52214	1.12538
pentyl_10mms_0g_run2	1	174	3.52328	1.11825
pentyl_10mms_0g_run2	1	175	3.52775	1.10349
pentyl_10mms_0g_run2	1	176	3.52888	1.10912
pentyl_10mms_0g_run2	1	177	3.53001	1.11766
pentyl_10mms_0g_run2	1	178	3.53114	1.08688
pentyl_10mms_0g_run2	1	179	3.53227	1.08541
pentyl_10mms_0g_run2	1	180	3.53674	1.10212
pentyl_10mms_0g_run2	1	181	3.53788	1.11913
pentyl_10mms_0g_run2	1	182	3.53901	1.10808
pentyl_10mms_0g_run2	1	183	3.54014	1.12183
pentyl_10mms_0g_run2	1	184	3.54128	1.12371
pentyl_10mms_0g_run2	1	185	3.54575	1.12142
pentyl_10mms_0g_run2	1	186	3.54688	1.09479
pentyl_10mms_0g_run2	1	187	3.54802	1.07557
pentyl_10mms_0g_run2	1	188	3.54915	1.1062
pentyl_10mms_0g_run2	1	189	3.55029	1.08841
pentyl_10mms_0g_run2	1	190	3.55474	1.11482
pentyl_10mms_0g_run2	1	191	3.55588	1.10353
pentyl_10mms_0g_run2	1	192	3.55701	1.13356
pentyl_10mms_0g_run2	1	193	3.55814	1.10561
pentyl_10mms_0g_run2	1	194	3.55928	1.0983
pentyl_10mms_0g_run2	1	195	3.56371	1.09938
pentyl_10mms_0g_run2	1	196	3.56482	1.10245
pentyl_10mms_0g_run2	1	197	3.56592	1.09042
pentyl_10mms_0g_run2	1	198	3.56702	1.09673
pentyl_10mms_0g_run2	1	199	3.56812	1.11464
pentyl_10mms_0g_run2	1	200	3.57273	1.10578
pentyl_10mms_0g_run2	1	201	3.57387	1.13323
pentyl_10mms_0g_run2	1	202	3.575	1.12181
pentyl_10mms_0g_run2	1	203	3.57614	1.10159
pentyl_10mms_0g_run2	1	204	3.57727	1.11258
pentyl_10mms_0g_run2	1	205	3.58175	1.10179
pentyl_10mms_0g_run2	1	206	3.58288	1.09154
pentyl_10mms_0g_run2	1	207	3.58402	1.10629
pentyl_10mms_0g_run2	1	208	3.58516	1.10712
pentyl_10mms_0g_run2	1	209	3.58629	1.09797
pentyl_10mms_0g_run2	1	210	3.59075	1.11335
pentyl_10mms_0g_run2	1	211	3.59188	1.10774
pentyl_10mms_0g_run2	1	212	3.59301	1.11623
pentyl_10mms_0g_run2	1	213	3.59415	1.09777
pentyl_10mms_0g_run2	1	214	3.59528	1.09503
pentyl_10mms_0g_run2	1	215	3.59975	1.10582
pentyl_10mms_0g_run2	1	216	3.60088	1.11331
pentyl_10mms_0g_run2	1	217	3.60201	1.10606
pentyl_10mms_0g_run2	1	218	3.60315	1.10083
pentyl_10mms_0g_run2	1	219	3.60428	1.11194
pentyl_10mms_0g_run2	1	220	3.60875	1.12287
pentyl_10mms_0g_run2	1	221	3.60988	1.10141
pentyl_10mms_0g_run2	1	222	3.61102	1.10002
pentyl_10mms_0g_run2	1	223	3.61215	1.11078
pentyl_10mms_0g_run2	1	224	3.61329	1.09965
pentyl_10mms_0g_run2	1	225	3.61775	1.11783
pentyl_10mms_0g_run2	1	226	3.61888	1.09536
pentyl_10mms_0g_run2	1	227	3.62001	1.11184
pentyl_10mms_0g_run2	1	228	3.62115	1.1164
pentyl_10mms_0g_run2	1	229	3.62228	1.09808
pentyl_10mms_0g_run2	1	230	3.62675	1.08976
pentyl_10mms_0g_run2	1	231	3.62788	1.10361
pentyl_10mms_0g_run2	1	232	3.62901	1.1127
pentyl_10mms_0g_run2	1	233	3.63015	1.09048
pentyl_10mms_0g_run2	1	234	3.63128	1.07344
pentyl_10mms_0g_run2	1	235	3.63575	1.10661
pentyl_10mms_0g_run2	1	236	3.63688	1.12165
pentyl_10mms_0g_run2	1	237	3.63801	1.10502
pentyl_10mms_0g_run2	1	238	3.63914	1.10036
pentyl_10mms_0g_run2	1	239	3.64028	1.1291
pentyl_10mms_0g_run2	1	240	3.64475	1.10192
pentyl_10mms_0g_run2	1	241	3.64588	1.07021
pentyl_10mms_0g_run2	1	242	3.64702	1.07015
pentyl_10mms_0g_run2	1	243	3.64815	1.04407
pentyl_10mms_0g_run2	1	244	3.64929	1.01654
pentyl_10mms_0g_run2	1	245	3.65375	0.951048
pentyl_10mms_0g_run2	1	246	3.65489	0.938098
pentyl_10mms_0g_run2	1	247	3.65602	0.946855
pentyl_10mms_0g_run2	1	248	3.65715	0.927029
pentyl_10mms_0g_run2	1	249	3.65828	0.922366
pentyl_10mms_0g_run2	1	250	3.66275	0.910395
pentyl_10mms_0g_run2	1	251	3.66388	0.932201
pentyl_10mms_0g_run2	1	252	3.66502	0.900717
pentyl_10mms_0g_run2	1	253	3.66615	0.928968
pentyl_10mms_0g_run2	1	254	3.66729	0.927322
pentyl_10mms_0g_run2	1	255	3.67175	0.923287
pentyl_10mms_0g_run2	1	256	3.67289	0.93032
pentyl_10mms_0g_run2	1	257	3.67402	0.913824
pentyl_10mms_0g_run2	1	258	3.67516	0.911198
pentyl_10mms_0g_run2	1	259	3.67629	0.880736
pentyl_10mms_0g_run2	1	260	3.68076	0.889905
pentyl_10mms_0g_run2	1	261	3.68189	0.871136
pentyl_10mms_0g_run2	1	262	3.68303	0.92133
pentyl_10mms_0g_run2	1	263	3.68416	0.888671
pentyl_10mms_0g_run2	1	264	3.6853	0.913454
pentyl_10mms_0g_run2	1	265	3.68975	0.897996
pentyl_10mms_0g_run2	1	266	3.69089	0.903933
pentyl_10mms_0g_run2	1	267	3.69202	0.892902
pentyl_10mms_0g_run2	1	268	3.69315	0.875505
pentyl_10mms_0g_run2	2	1	4.24217	0.758206
pentyl_10mms_0g_run2	2	2	4.24331	0.729034
pentyl_10mms_0g_run2	2	3	4.24778	0.708188
pentyl_10mms_0g_run2	2	4	4.24891	0.73501
pentyl_10mms_0g_run2	2	5	4.25005	0.735852
pentyl_10mms_0g_run2	2	6	4.25119	0.73885
pentyl_10mms_0g_run2	2	7	4.25232	0.765453
pentyl_10mms_0g_run2	2	8	4.25678	0.755089
pentyl_10mms_0g_run2	2	9	4.25791	0.750269
pentyl_10mms_0g_run2	2	10	4.25905	0.735615
pentyl_10mms_0g_run2	2	11	4.26019	0.745508
pentyl_10mms_0g_run2	2	12	4.26132	0.734949
pentyl_10mms_0g_run2	2	13	4.26578	0.742785
pentyl_10mms_0g_run2	2	14	4.26691	0.73634
pentyl_10mms_0g_run2	2	15	4.26805	0.738181
pentyl_10mms_0g_run2	2	16	4.26918	0.74974
pentyl_10mms_0g_run2	2	17	4.27032	0.732069
pentyl_10mms_0g_run2	2	18	4.27478	0.755481
pentyl_10mms_0g_run2	2	19	4.27592	0.735497
pentyl_10mms_0g_run2	2	20	4.27705	0.743686
pentyl_10mms_0g_run2	2	21	4.27819	0.727269
pentyl_10mms_0g_run2	2	22	4.27932	0.744999
pentyl_10mms_0g_run2	2	23	4.28375	0.741335
pentyl_10mms_0g_run2	2	24	4.28485	0.766432
pentyl_10mms_0g_run2	2	25	4.28596	0.794801
pentyl_10mms_0g_run2	2	26	4.28706	0.792999
pentyl_10mms_0g_run2	2	27	4.28817	0.83851
pentyl_10mms_0g_run2	2	28	4.29277	0.964544
pentyl_10mms_0g_run2	2	29	4.2939	1.02003
pentyl_10mms_0g_run2	2	30	4.29504	1.03774
pentyl_10mms_0g_run2	2	31	4.29617	1.05206
pentyl_10mms_0g_run2	2	32	4.2973	1.08781
pentyl_10mms_0g_run2	2	33	4.30178	1.1413
pentyl_10mms_0g_run2	2	34	4.30292	1.12929
pentyl_10mms_0g_run2	2	35	4.30405	1.16524
pentyl_10mms_0g_run2	2	36	4.30518	1.15458
pentyl_10mms_0g_run2	2	37	4.30632	1.18372
pentyl_10mms_0g_run2	2	38	4.31078	1.21048
pentyl_10mms_0g_run2	2	39	4.31191	1.20862
pentyl_10mms_0g_run2	2	40	4.31304	1.21105
pentyl_10mms_0g_run2	2	41	4.31418	1.18432
pentyl_10mms_0g_run2	2	42	4.31531	1.193
pentyl_10mms_0g_run2	2	43	4.31978	1.1847
pentyl_10mms_0g_run2	2	44	4.32091	1.18946
pentyl_10mms_0g_run2	2	45	4.32205	1.17629
pentyl_10mms_0g_run2	2	46	4.32318	1.2093
pentyl_10mms_0g_run2	2	47	4.32431	1.19132
pentyl_10mms_0g_run2	2	48	4.32879	1.18299
pentyl_10mms_0g_run2	2	49	4.32992	1.16438
pentyl_10mms_0g_run2	2	50	4.33105	1.14453
pentyl_10mms_0g_run2	2	51	4.33219	1.17427
pentyl_10mms_0g_run2	2	52	4.33332	1.14367
pentyl_10mms_0g_run2	2	53	4.33778	1.16573
pentyl_10mms_0g_run2	2	54	4.33892	1.153
pentyl_10mms_0g_run2	2	55	4.34005	1.19136
pentyl_10mms_0g_run2	2	56	4.34118	1.13493
pentyl_10mms_0g_run2	2	57	4.34232	1.15458
pentyl_10mms_0g_run2	2	58	4.34678	1.13382
pentyl_10mms_0g_run2	2	59	4.34791	1.13801
pentyl_10mms_0g_run2	2	60	4.34905	1.13346
pentyl_10mms_0g_run2	2	61	4.35018	1.13241
pentyl_10mms_0g_run2	2	62	4.35131	1.14718
pentyl_10mms_0g_run2	2	63	4.35578	1.16001
pentyl_10mms_0g_run2	2	64	4.35692	1.16066
pentyl_10mms_0g_run2	2	65	4.35805	1.14816
pentyl_10mms_0g_run2	2	66	4.35918	1.1588
pentyl_10mms_0g_run2	2	67	4.36032	1.13724
pentyl_10mms_0g_run2	2	68	4.36479	1.11403
pentyl_10mms_0g_run2	2	69	4.36592	1.12529
pentyl_10mms_0g_run2	2	70	4.36705	1.13513
pentyl_10mms_0g_run2	2	71	4.36819	1.13231
pentyl_10mms_0g_run2	2	72	4.36932	1.11996
pentyl_10mms_0g_run2	2	73	4.37378	1.13987
pentyl_10mms_0g_run2	2	74	4.37492	1.14065
pentyl_10mms_0g_run2	2	75	4.37605	1.14293
pentyl_10mms_0g_run2	2	76	4.37718	1.12124
pentyl_10mms_0g_run2	2	77	4.37832	1.13534
pentyl_10mms_0g_run2	2	78	4.38278	1.13736
pentyl_10mms_0g_run2	2	79	4.38391	1.14193
pentyl_10mms_0g_run2	2	80	4.38504	1.12363
pentyl_10mms_0g_run2	2	81	4.38618	1.12247
pentyl_10mms_0g_run2	2	82	4.38731	1.14306
pentyl_10mms_0g_run2	2	83	4.39179	1.15178
pentyl_10mms_0g_run2	2	84	4.39292	1.11389
pentyl_10mms_0g_run2	2	85	4.39405	1.1258
pentyl_10mms_0g_run2	2	86	4.39519	1.13478
pentyl_10mms_0g_run2	2	87	4.39632	1.11538
pentyl_10mms_0g_run2	2	88	4.40079	1.12039
pentyl_10mms_0g_run2	2	89	4.40192	1.11697
pentyl_10mms_0g_run2	2	90	4.40305	1.13624
pentyl_10mms_0g_run2	2	91	4.40419	1.1174
pentyl_10mms_0g_run2	2	92	4.40532	1.11695
pentyl_10mms_0g_run2	2	93	4.40979	1.1076
pentyl_10mms_0g_run2	2	94	4.41092	1.13624
pentyl_10mms_0g_run2	2	95	4.41205	1.11985
pentyl_10mms_0g_run2	2	96	4.41319	1.11348
pentyl_10mms_0g_run2	2	97	4.41432	1.09692
pentyl_10mms_0g_run2	2	98	4.41878	1.11571
pentyl_10mms_0g_run2	2	99	4.41992	1.12858
pentyl_10mms_0g_run2	2	100	4.42105	1.10547
pentyl_10mms_0g_run2	2	101	4.42219	1.1306
pentyl_10mms_0g_run2	2	102	4.42332	1.13481
pentyl_10mms_0g_run2	2	103	4.42775	1.11871
pentyl_10mms_0g_run2	2	104	4.42886	1.11305
pentyl_10mms_0g_run2	2	105	4.42996	1.10856
pentyl_10mms_0g_run2	2	106	4.43106	1.10353
pentyl_10mms_0g_run2	2	107	4.43216	1.10114
pentyl_10mms_0g_run2	2	108	4.43677	1.12702
pentyl_10mms_0g_run2	2	109	4.43791	1.1116
pentyl_10mms_0g_run2	2	110	4.43904	1.12711
pentyl_10mms_0g_run2	2	111	4.44017	1.14859
pentyl_10mms_0g_run2	2	112	4.4413	1.11215
pentyl_10mms_0g_run2	2	113	4.44579	1.10564
pentyl_10mms_0g_run2	2	114	4.44692	1.1161
pentyl_10mms_0g_run2	2	115	4.44806	1.08977
pentyl_10mms_0g_run2	2	116	4.44919	1.11844
pentyl_10mms_0g_run2	2	117	4.45033	1.10227
pentyl_10mms_0g_run2	2	118	4.45479	1.12855
pentyl_10mms_0g_run2	2	119	4.45592	1.15137
pentyl_10mms_0g_run2	2	120	4.45705	1.11753
pentyl_10mms_0g_run2	2	121	4.45819	1.13534
pentyl_10mms_0g_run2	2	122	4.45932	1.10421
pentyl_10mms_0g_run2	2	123	4.46379	1.11673
pentyl_10mms_0g_run2	2	124	4.46492	1.07249
pentyl_10mms_0g_run2	2	125	4.46605	1.13197
pentyl_10mms_0g_run2	2	126	4.46718	1.1165
pentyl_10mms_0g_run2	2	127	4.46831	1.10065
pentyl_10mms_0g_run2	2	128	4.47279	1.12149
pentyl_10mms_0g_run2	2	129	4.47393	1.13581
pentyl_10mms_0g_run2	2	130	4.47506	1.1078
pentyl_10mms_0g_run2	2	131	4.4762	1.12206
pentyl_10mms_0g_run2	2	132	4.47733	1.10909
pentyl_10mms_0g_run2	2	133	4.48179	1.09749
pentyl_10mms_0g_run2	2	134	4.48292	1.10249
pentyl_10mms_0g_run2	2	135	4.48405	1.10288
pentyl_10mms_0g_run2	2	136	4.48519	1.11275
pentyl_10mms_0g_run2	2	137	4.48632	1.11563
pentyl_10mms_0g_run2	2	138	4.49079	1.13082
pentyl_10mms_0g_run2	2	139	4.49192	1.11371
pentyl_10mms_0g_run2	2	140	4.49305	1.10296
pentyl_10mms_0g_run2	2	141	4.49419	1.11691
pentyl_10mms_0g_run2	2	142	4.49532	1.10139
pentyl_10mms_0g_run2	2	143	4.49979	1.09894
pentyl_10mms_0g_run2	2	144	4.50092	1.09845
pentyl_10mms_0g_run2	2	145	4.50205	1.11879
pentyl_10mms_0g_run2	2	146	4.50319	1.10378
pentyl_10mms_0g_run2	2	147	4.50432	1.11853
pentyl_10mms_0g_run2	2	148	4.50879	1.10766
pentyl_10mms_0g_run2	2	149	4.50993	1.10915
pentyl_10mms_0g_run2	2	150	4.51106	1.09706
pentyl_10mms_0g_run2	2	151	4.51219	1.1114
pentyl_10mms_0g_run2	2	152	4.51333	1.10121
pentyl_10mms_0g_run2	2	153	4.51779	1.11344
pentyl_10mms_0g_run2	2	154	4.51892	1.10987
pentyl_10mms_0g_run2	2	155	4.52006	1.10978
pentyl_10mms_0g_run2	2	156	4.52119	1.11295
pentyl_10mms_0g_run2	2	157	4.52232	1.09941
pentyl_10mms_0g_run2	2	158	4.52679	1.10135
pentyl_10mms_0g_run2	2	159	4.52792	1.10263
pentyl_10mms_0g_run2	2	160	4.52906	1.10766
pentyl_10mms_0g_run2	2	161	4.53019	1.09475
pentyl_10mms_0g_run2	2	162	4.53132	1.09048
pentyl_10mms_0g_run2	2	163	4.53579	1.10435
pentyl_10mms_0g_run2	2	164	4.53693	1.11291
pentyl_10mms_0g_run2	2	165	4.53806	1.10337
pentyl_10mms_0g_run2	2	166	4.53919	1.1375
pentyl_10mms_0g_run2	2	167	4.54032	1.13041
pentyl_10mms_0g_run2	2	168	4.54479	1.10617
pentyl_10mms_0g_run2	2	169	4.54593	1.10306
pentyl_10mms_0g_run2	2	170	4.54706	1.0963
pentyl_10mms_0g_run2	2	171	4.54819	1.09769
pentyl_10mms_0g_run2	2	172	4.54933	1.1114
pentyl_10mms_0g_run2	2	173	4.55379	1.10884
pentyl_10mms_0g_run2	2	174	4.55493	1.10325
pentyl_10mms_0g_run2	2	175	4.55606	1.13597
pentyl_10mms_0g_run2	2	176	4.5572	1.10492
pentyl_10mms_0g_run2	2	177	4.55833	1.10982
pentyl_10mms_0g_run2	2	178	4.5628	1.09266
pentyl_10mms_0g_run2	2	179	4.56393	1.10876
pentyl_10mms_0g_run2	2	180	4.56506	1.08255
pentyl_10mms_0g_run2	2	181	4.56619	1.08384
pentyl_10mms_0g_run2	2	182	4.56733	1.11293
pentyl_10mms_0g_run2	2	183	4.57176	1.11814
pentyl_10mms_0g_run2	2	184	4.57286	1.10594
pentyl_10mms_0g_run2	2	185	4.57396	1.12524
pentyl_10mms_0g_run2	2	186	4.57507	1.0974
pentyl_10mms_0g_run2	2	187	4.57617	1.10954
pentyl_10mms_0g_run2	2	188	4.58078	1.07069
pentyl_10mms_0g_run2	2	189	4.58192	1.09048
pentyl_10mms_0g_run2	2	190	4.58305	1.08092
pentyl_10mms_0g_run2	2	191	4.58419	1.11317
pentyl_10mms_0g_run2	2	192	4.58532	1.09924
pentyl_10mms_0g_run2	2	193	4.5898	1.11477
pentyl_10mms_0g_run2	2	194	4.59093	1.08788
pentyl_10mms_0g_run2	2	195	4.59206	1.11997
pentyl_10mms_0g_run2	2	196	4.5932	1.07816
pentyl_10mms_0g_run2	2	197	4.59433	1.10672
pentyl_10mms_0g_run2	2	198	4.59879	1.08392
pentyl_10mms_0g_run2	2	199	4.59993	1.10717
pentyl_10mms_0g_run2	2	200	4.60106	1.09891
pentyl_10mms_0g_run2	2	201	4.60219	1.09538
pentyl_10mms_0g_run2	2	202	4.60332	1.11675
pentyl_10mms_0g_run2	2	203	4.60779	1.11123
pentyl_10mms_0g_run2	2	204	4.60893	1.09426
pentyl_10mms_0g_run2	2	205	4.61006	1.08527
pentyl_10mms_0g_run2	2	206	4.6112	1.10999
pentyl_10mms_0g_run2	2	207	4.61233	1.08703
pentyl_10mms_0g_run2	2	208	4.6168	1.08911
pentyl_10mms_0g_run2	2	209	4.61793	1.09305
pentyl_10mms_0g_run2	2	210	4.61906	1.1124
pentyl_10mms_0g_run2	2	211	4.6202	1.09771
pentyl_10mms_0g_run2	2	212	4.62133	1.08827
pentyl_10mms_0g_run2	2	213	4.6258	1.08719
pentyl_10mms_0g_run2	2	214	4.62693	1.09716
pentyl_10mms_0g_run2	2	215	4.62806	1.1077
pentyl_10mms_0g_run2	2	216	4.62919	1.07673
pentyl_10mms_0g_run2	2	217	4.63032	1.09524
pentyl_10mms_0g_run2	2	218	4.63479	1.09485
pentyl_10mms_0g_run2	2	219	4.63593	1.1147
pentyl_10mms_0g_run2	2	220	4.63706	1.08433
pentyl_10mms_0g_run2	2	221	4.63819	1.10792
pentyl_10mms_0g_run2	2	222	4.63933	1.13315
pentyl_10mms_0g_run2	2	223	4.6438	1.11709
pentyl_10mms_0g_run2	2	224	4.64493	1.0846
pentyl_10mms_0g_run2	2	225	4.64606	1.09136
pentyl_10mms_0g_run2	2	226	4.6472	1.10435
pentyl_10mms_0g_run2	2	227	4.64833	1.06495
pentyl_10mms_0g_run2	2	228	4.6528	1.08588
pentyl_10mms_0g_run2	2	229	4.65394	1.10547
pentyl_10mms_0g_run2	2	230	4.65507	1.10882
pentyl_10mms_0g_run2	2	231	4.6562	1.11221
pentyl_10mms_0g_run2	2	232	4.65733	1.11595
pentyl_10mms_0g_run2	2	233	4.66179	1.08404
pentyl_10mms_0g_run2	2	234	4.66293	1.1078
pentyl_10mms_0g_run2	2	235	4.66406	1.0894
pentyl_10mms_0g_run2	2	236	4.66519	1.06787
pentyl_10mms_0g_run2	2	237	4.66632	1.09385
pentyl_10mms_0g_run2	2	238	4.6708	1.104
pentyl_10mms_0g_run2	2	239	4.67193	1.10829
pentyl_10mms_0g_run2	2	240	4.67306	1.10396
pentyl_10mms_0g_run2	2	241	4.67419	1.10425
pentyl_10mms_0g_run2	2	242	4.67533	1.10659
pentyl_10mms_0g_run2	2	243	4.6798	1.10077
pentyl_10mms_0g_run2	2	244	4.68094	1.06246
pentyl_10mms_0g_run2	2	245	4.68207	1.09738
pentyl_10mms_0g_run2	2	246	4.6832	1.079
pentyl_10mms_0g_run2	2	247	4.68433	1.06705
pentyl_10mms_0g_run2	2	248	4.6888	1.00179
pentyl_10mms_0g_run2	2	249	4.68993	1.00528
pentyl_10mms_0g_run2	2	250	4.69106	0.967072
pentyl_10mms_0g_run2	2	251	4.69219	0.931239
pentyl_10mms_0g_run2	2	252	4.69333	0.933864
pentyl_10mms_0g_run2	2	253	4.6978	0.887295
pentyl_10mms_0g_run2	2	254	4.69893	0.901146
pentyl_10mms_0g_run2	2	255	4.70007	0.891683
pentyl_10mms_0g_run2	2	256	4.70121	0.917544
pentyl_10mms_0g_run2	2	257	4.70234	0.908395
pentyl_10mms_0g_run2	2	258	4.7068	0.94895
pentyl_10mms_0g_run2	2	259	4.70793	0.922717
pentyl_10mms_0g_run2	2	260	4.70906	0.910198
pentyl_10mms_0g_run2	2	261	4.7102	0.906651
pentyl_10mms_0g_run2	2	262	4.71133	0.890057
pentyl_10mms_0g_run2	2	263	4.71577	0.882416
pentyl_10mms_0g_run2	2	264	4.71687	0.888333
pentyl_10mms_0g_run2	2	265	4.71797	0.874364
pentyl_10mms_0g_run2	2	266	4.71907	0.898776
pentyl_10mms_0g_run2	2	267	4.72018	0.891585
pentyl_10mms_0g_run2	2	268	4.72479	0.897561
pentyl_10mms_0g_run2	3	1	5.19623	0.764518
pentyl_10mms_0g_run2	3	2	5.19736	0.726353
pentyl_10mms_0g_run2	3	3	5.20182	0.761873
pentyl_10mms_0g_run2	3	4	5.20295	0.762715
pentyl_10mms_0g_run2	3	5	5.20409	0.748727
pentyl_10mms_0g_run2	3	6	5.20522	0.773687
pentyl_10mms_0g_run2	3	7	5.20635	0.769024
pentyl_10mms_0g_run2	3	8	5.21082	0.766849
pentyl_10mms_0g_run2	3	9	5.21195	0.742516
pentyl_10mms_0g_run2	3	10	5.21308	0.759385
pentyl_10mms_0g_run2	3	11	5.21422	0.737207
pentyl_10mms_0g_run2	3	12	5.21535	0.739186
pentyl_10mms_0g_run2	3	13	5.21982	0.746297
pentyl_10mms_0g_run2	3	14	5.22095	0.764812
pentyl_10mms_0g_run2	3	15	5.22209	0.762892
pentyl_10mms_0g_run2	3	16	5.22322	0.766869
pentyl_10mms_0g_run2	3	17	5.22435	0.77882
pentyl_10mms_0g_run2	3	18	5.22883	0.760247
pentyl_10mms_0g_run2	3	19	5.22996	0.749079
pentyl_10mms_0g_run2	3	20	5.2311	0.729919
pentyl_10mms_0g_run2	3	21	5.23223	0.768279
pentyl_10mms_0g_run2	3	22	5.23337	0.73801
pentyl_10mms_0g_run2	3	23	5.23782	0.78938
pentyl_10mms_0g_run2	3	24	5.23896	0.806405
pentyl_10mms_0g_run2	3	25	5.24009	0.818963
pentyl_10mms_0g_run2	3	26	5.24123	0.830013
pentyl_10mms_0g_run2	3	27	5.24236	0.852191
pentyl_10mms_0g_run2	3	28	5.24682	0.982457
pentyl_10mms_0g_run2	3	29	5.24795	0.996446
pentyl_10mms_0g_run2	3	30	5.24909	1.07667
pentyl_10mms_0g_run2	3	31	5.25023	1.06817
pentyl_10mms_0g_run2	3	32	5.25136	1.10641
pentyl_10mms_0g_run2	3	33	5.25583	1.15708
pentyl_10mms_0g_run2	3	34	5.25696	1.17073
pentyl_10mms_0g_run2	3	35	5.25809	1.15375
pentyl_10mms_0g_run2	3	36	5.25922	1.16012
pentyl_10mms_0g_run2	3	37	5.26036	1.1782
pentyl_10mms_0g_run2	3	38	5.26483	1.19916
pentyl_10mms_0g_run2	3	39	5.26596	1.19391
pentyl_10mms_0g_run2	3	40	5.26709	1.19893
pentyl_10mms_0g_run2	3	41	5.26823	1.22577
pentyl_10mms_0g_run2	3	42	5.26936	1.19885
pentyl_10mms_0g_run2	3	43	5.27383	1.19538
pentyl_10mms_0g_run2	3	44	5.27496	1.17391
pentyl_10mms_0g_run2	3	45	5.27609	1.18092
pentyl_10mms_0g_run2	3	46	5.27723	1.16717
pentyl_10mms_0g_run2	3	47	5.27836	1.16964
pentyl_10mms_0g_run2	3	48	5.28282	1.1458
pentyl_10mms_0g_run2	3	49	5.28396	1.18012
pentyl_10mms_0g_run2	3	50	5.28509	1.16631
pentyl_10mms_0g_run2	3	51	5.28623	1.165
pentyl_10mms_0g_run2	3	52	5.28736	1.16707
pentyl_10mms_0g_run2	3	53	5.29179	1.16321
pentyl_10mms_0g_run2	3	54	5.29289	1.13808
pentyl_10mms_0g_run2	3	55	5.29399	1.1535
pentyl_10mms_0g_run2	3	56	5.2951	1.12771
pentyl_10mms_0g_run2	3	57	5.2962	1.14836
pentyl_10mms_0g_run2	3	58	5.30081	1.13414
pentyl_10mms_0g_run2	3	59	5.30195	1.15152
pentyl_10mms_0g_run2	3	60	5.30308	1.12168
pentyl_10mms_0g_run2	3	61	5.30421	1.15156
pentyl_10mms_0g_run2	3	62	5.30535	1.13986
pentyl_10mms_0g_run2	3	63	5.30983	1.12426
pentyl_10mms_0g_run2	3	64	5.31096	1.13073
pentyl_10mms_0g_run2	3	65	5.3121	1.13428
pentyl_10mms_0g_run2	3	66	5.31323	1.12777
pentyl_10mms_0g_run2	3	67	5.31436	1.11972
pentyl_10mms_0g_run2	3	68	5.31883	1.11598
pentyl_10mms_0g_run2	3	69	5.31996	1.13729
pentyl_10mms_0g_run2	3	70	5.32109	1.12566
pentyl_10mms_0g_run2	3	71	5.32223	1.16558
pentyl_10mms_0g_run2	3	72	5.32336	1.13755
pentyl_10mms_0g_run2	3	73	5.32783	1.12838
pentyl_10mms_0g_run2	3	74	5.32896	1.12591
pentyl_10mms_0g_run2	3	75	5.33009	1.11564
pentyl_10mms_0g_run2	3	76	5.33123	1.10332
pentyl_10mms_0g_run2	3	77	5.33236	1.12256
pentyl_10mms_0g_run2	3	78	5.33683	1.11418
pentyl_10mms_0g_run2	3	79	5.33797	1.11915
pentyl_10mms_0g_run2	3	80	5.3391	1.13633
pentyl_10mms_0g_run2	3	81	5.34024	1.11764
pentyl_10mms_0g_run2	3	82	5.34137	1.1301
pentyl_10mms_0g_run2	3	83	5.34583	1.10955
pentyl_10mms_0g_run2	3	84	5.34697	1.1148
pentyl_10mms_0g_run2	3	85	5.3481	1.08888
pentyl_10mms_0g_run2	3	86	5.34923	1.10892
pentyl_10mms_0g_run2	3	87	5.35037	1.11898
pentyl_10mms_0g_run2	3	88	5.35483	1.11404
pentyl_10mms_0g_run2	3	89	5.35596	1.14068
pentyl_10mms_0g_run2	3	90	5.35709	1.11416
pentyl_10mms_0g_run2	3	91	5.35823	1.12765
pentyl_10mms_0g_run2	3	92	5.35936	1.09868
pentyl_10mms_0g_run2	3	93	5.36383	1.08947
pentyl_10mms_0g_run2	3	94	5.36496	1.08563
pentyl_10mms_0g_run2	3	95	5.3661	1.10816
pentyl_10mms_0g_run2	3	96	5.36723	1.09789
pentyl_10mms_0g_run2	3	97	5.36836	1.09901
pentyl_10mms_0g_run2	3	98	5.37283	1.12068
pentyl_10mms_0g_run2	3	99	5.37397	1.10316
pentyl_10mms_0g_run2	3	100	5.3751	1.10708
pentyl_10mms_0g_run2	3	101	5.37623	1.09503
pentyl_10mms_0g_run2	3	102	5.37736	1.1197
pentyl_10mms_0g_run2	3	103	5.38183	1.08912
pentyl_10mms_0g_run2	3	104	5.38296	1.09901
pentyl_10mms_0g_run2	3	105	5.38409	1.09805
pentyl_10mms_0g_run2	3	106	5.38523	1.10857
pentyl_10mms_0g_run2	3	107	5.38636	1.11739
pentyl_10mms_0g_run2	3	108	5.39083	1.1166
pentyl_10mms_0g_run2	3	109	5.39196	1.10416
pentyl_10mms_0g_run2	3	110	5.3931	1.10271
pentyl_10mms_0g_run2	3	111	5.39423	1.1147
pentyl_10mms_0g_run2	3	112	5.39536	1.0862
pentyl_10mms_0g_run2	3	113	5.39983	1.09382
pentyl_10mms_0g_run2	3	114	5.40097	1.09727
pentyl_10mms_0g_run2	3	115	5.4021	1.11751
pentyl_10mms_0g_run2	3	116	5.40323	1.09505
pentyl_10mms_0g_run2	3	117	5.40436	1.10436
pentyl_10mms_0g_run2	3	118	5.40884	1.10034
pentyl_10mms_0g_run2	3	119	5.40997	1.11306
pentyl_10mms_0g_run2	3	120	5.4111	1.08767
pentyl_10mms_0g_run2	3	121	5.41223	1.10387
pentyl_10mms_0g_run2	3	122	5.41337	1.11553
pentyl_10mms_0g_run2	3	123	5.41783	1.11633
pentyl_10mms_0g_run2	3	124	5.41897	1.09421
pentyl_10mms_0g_run2	3	125	5.4201	1.09887
pentyl_10mms_0g_run2	3	126	5.42124	1.11719
pentyl_10mms_0g_run2	3	127	5.42237	1.1079
pentyl_10mms_0g_run2	3	128	5.42683	1.09883
pentyl_10mms_0g_run2	3	129	5.42796	1.09009
pentyl_10mms_0g_run2	3	130	5.4291	1.10867
pentyl_10mms_0g_run2	3	131	5.43023	1.09294
pentyl_10mms_0g_run2	3	132	5.43136	1.06367
pentyl_10mms_0g_run2	3	133	5.4358	1.08886
pentyl_10mms_0g_run2	3	134	5.4369	1.11208
pentyl_10mms_0g_run2	3	135	5.438	1.09823
pentyl_10mms_0g_run2	3	136	5.4391	1.11327
pentyl_10mms_0g_run2	3	137	5.44021	1.1121
pentyl_10mms_0g_run2	3	138	5.44482	1.09117
pentyl_10mms_0g_run2	3	139	5.44596	1.10871
pentyl_10mms_0g_run2	3	140	5.44709	1.07838
pentyl_10mms_0g_run2	3	141	5.44822	1.07473
pentyl_10mms_0g_run2	3	142	5.44935	1.10056
pentyl_10mms_0g_run2	3	143	5.45384	1.11513
pentyl_10mms_0g_run2	3	144	5.45497	1.08663
pentyl_10mms_0g_run2	3	145	5.4561	1.12636
pentyl_10mms_0g_run2	3	146	5.45724	1.085
pentyl_10mms_0g_run2	3	147	5.45838	1.1006
pentyl_10mms_0g_run2	3	148	5.46284	1.08287
pentyl_10mms_0g_run2	3	149	5.46397	1.07003
pentyl_10mms_0g_run2	3	150	5.4651	1.09746
pentyl_10mms_0g_run2	3	151	5.46624	1.07689
pentyl_10mms_0g_run2	3	152	5.46737	1.09154
pentyl_10mms_0g_run2	3	153	5.47183	1.08304
pentyl_10mms_0g_run2	3	154	5.47296	1.1273
pentyl_10mms_0g_run2	3	155	5.4741	1.10338
pentyl_10mms_0g_run2	3	156	5.47523	1.0841
pentyl_10mms_0g_run2	3	157	5.47636	1.09495
pentyl_10mms_0g_run2	3	158	5.48084	1.08812
pentyl_10mms_0g_run2	3	159	5.48197	1.08684
pentyl_10mms_0g_run2	3	160	5.4831	1.07695
pentyl_10mms_0g_run2	3	161	5.48423	1.10453
pentyl_10mms_0g_run2	3	162	5.48537	1.0968
pentyl_10mms_0g_run2	3	163	5.48983	1.1263
pentyl_10mms_0g_run2	3	164	5.49097	1.08866
pentyl_10mms_0g_run2	3	165	5.4921	1.10604
pentyl_10mms_0g_run2	3	166	5.49324	1.08357
pentyl_10mms_0g_run2	3	167	5.49437	1.08829
pentyl_10mms_0g_run2	3	168	5.49883	1.09466
pentyl_10mms_0g_run2	3	169	5.49997	1.09182
pentyl_10mms_0g_run2	3	170	5.5011	1.09815
pentyl_10mms_0g_run2	3	171	5.50224	1.08598
pentyl_10mms_0g_run2	3	172	5.50337	1.09805
pentyl_10mms_0g_run2	3	173	5.50784	1.09944
pentyl_10mms_0g_run2	3	174	5.50897	1.10093
pentyl_10mms_0g_run2	3	175	5.5101	1.0775
pentyl_10mms_0g_run2	3	176	5.51124	1.09023
pentyl_10mms_0g_run2	3	177	5.51237	1.09053
pentyl_10mms_0g_run2	3	178	5.51684	1.09723
pentyl_10mms_0g_run2	3	179	5.51797	1.08514
pentyl_10mms_0g_run2	3	180	5.51911	1.08953
pentyl_10mms_0g_run2	3	181	5.52024	1.09372
pentyl_10mms_0g_run2	3	182	5.52137	1.08835
pentyl_10mms_0g_run2	3	183	5.52584	1.08512
pentyl_10mms_0g_run2	3	184	5.52697	1.08122
pentyl_10mms_0g_run2	3	185	5.52811	1.08863
pentyl_10mms_0g_run2	3	186	5.52924	1.08179
pentyl_10mms_0g_run2	3	187	5.53038	1.0776
pentyl_10mms_0g_run2	3	188	5.53483	1.07834
pentyl_10mms_0g_run2	3	189	5.53597	1.10052
pentyl_10mms_0g_run2	3	190	5.5371	1.09051
pentyl_10mms_0g_run2	3	191	5.53824	1.08951
pentyl_10mms_0g_run2	3	192	5.53937	1.11509
pentyl_10mms_0g_run2	3	193	5.54384	1.09366
pentyl_10mms_0g_run2	3	194	5.54497	1.07922
pentyl_10mms_0g_run2	3	195	5.54611	1.08036
pentyl_10mms_0g_run2	3	196	5.54724	1.06302
pentyl_10mms_0g_run2	3	197	5.54837	1.06411
pentyl_10mms_0g_run2	3	198	5.55284	1.09675
pentyl_10mms_0g_run2	3	199	5.55397	1.08457
pentyl_10mms_0g_run2	3	200	5.55511	1.0966
pentyl_10mms_0g_run2	3	201	5.55624	1.10053
pentyl_10mms_0g_run2	3	202	5.55738	1.09632
pentyl_10mms_0g_run2	3	203	5.56184	1.07501
pentyl_10mms_0g_run2	3	204	5.56298	1.08766
pentyl_10mms_0g_run2	3	205	5.56411	1.06215
pentyl_10mms_0g_run2	3	206	5.56524	1.06795
pentyl_10mms_0g_run2	3	207	5.56637	1.08586
pentyl_10mms_0g_run2	3	208	5.57084	1.07561
pentyl_10mms_0g_run2	3	209	5.57197	1.09959
pentyl_10mms_0g_run2	3	210	5.5731	1.09654
pentyl_10mms_0g_run2	3	211	5.57424	1.10194
pentyl_10mms_0g_run2	3	212	5.57537	1.08169
pentyl_10mms_0g_run2	3	213	5.57981	1.08435
pentyl_10mms_0g_run2	3	214	5.58091	1.06895
pentyl_10mms_0g_run2	3	215	5.58201	1.08433
pentyl_10mms_0g_run2	3	216	5.58311	1.07851
pentyl_10mms_0g_run2	3	217	5.58421	1.07244
pentyl_10mms_0g_run2	3	218	5.58883	1.12289
pentyl_10mms_0g_run2	3	219	5.58996	1.08968
pentyl_10mms_0g_run2	3	220	5.59109	1.08282
pentyl_10mms_0g_run2	3	221	5.59223	1.09099
pentyl_10mms_0g_run2	3	222	5.59336	1.08218
pentyl_10mms_0g_run2	3	223	5.59784	1.05743
pentyl_10mms_0g_run2	3	224	5.59897	1.09575
pentyl_10mms_0g_run2	3	225	5.60011	1.06815
pentyl_10mms_0g_run2	3	226	5.60124	1.08827
pentyl_10mms_0g_run2	3	227	5.60237	1.09285
pentyl_10mms_0g_run2	3	228	5.60684	1.09466
pentyl_10mms_0g_run2	3	229	5.60797	1.08378
pentyl_10mms_0g_run2	3	230	5.6091	1.07371
pentyl_10mms_0g_run2	3	231	5.61024	1.09252
pentyl_10mms_0g_run2	3	232	5.61137	1.07412
pentyl_10mms_0g_run2	3	233	5.61584	1.07657
pentyl_10mms_0g_run2	3	234	5.61698	1.07164
pentyl_10mms_0g_run2	3	235	5.61811	1.10114
pentyl_10mms_0g_run2	3	236	5.61925	1.06838
pentyl_10mms_0g_run2	3	237	5.62038	1.09035
pentyl_10mms_0g_run2	3	238	5.62485	1.08077
pentyl_10mms_0g_run2	3	239	5.62598	1.09248
pentyl_10mms_0g_run2	3	240	5.62711	1.06674
pentyl_10mms_0g_run2	3	241	5.62825	1.08651
pentyl_10mms_0g_run2	3	242	5.62939	1.08153
pentyl_10mms_0g_run2	3	243	5.63384	1.0831
pentyl_10mms_0g_run2	3	244	5.63497	1.08541
pentyl_10mms_0g_run2	3	245	5.63611	1.07424
pentyl_10mms_0g_run2	3	246	5.63724	1.07934
pentyl_10mms_0g_run2	3	247	5.63838	1.05988
pentyl_10mms_0g_run2	3	248	5.64284	0.992172
pentyl_10mms_0g_run2	3	249	5.64397	0.959414
pentyl_10mms_0g_run2	3	250	5.64511	0.939705
pentyl_10mms_0g_run2	3	251	5.64624	0.928949
pentyl_10mms_0g_run2	3	252	5.64737	0.883692
pentyl_10mms_0g_run2	3	253	5.65184	0.886592
pentyl_10mms_0g_run2	3	254	5.65298	0.894154
pentyl_10mms_0g_run2	3	255	5.65411	0.897739
pentyl_10mms_0g_run2	3	256	5.65525	0.895447
pentyl_10mms_0g_run2	3	257	5.65638	0.930673
pentyl_10mms_0g_run2	3	258	5.66085	0.89625
pentyl_10mms_0g_run2	3	259	5.66198	0.902539
pentyl_10mms_0g_run2	3	260	5.66311	0.876188
pentyl_10mms_0g_run2	3	261	5.66425	0.873759
pentyl_10mms_0g_run2	3	262	5.66538	0.884437
pentyl_10mms_0g_run2	3	263	5.66984	0.880773
pentyl_10mms_0g_run2	3	264	5.67098	0.866255
pentyl_10mms_0g_run2	3	265	5.67211	0.904146
pentyl_10mms_0g_run2	3	266	5.67325	0.894174
pentyl_10mms_0g_run2	3	267	5.67438	0.873563
pentyl_10mms_0g_run2	3	268	5.67884	0.87129
pentyl_10mms_0g_run3	1	1	3.09022	0.425262
pentyl_10mms_0g_run3	1	2	3.09135	0.427064
pentyl_10mms_0g_run3	1	3	3.09579	0.414585
pentyl_10mms_0g_run3	1	4	3.0969	0.410627
pentyl_10mms_0g_run3	1	5	3.098	0.420834
pentyl_10mms_0g_run3	1	6	3.0991	0.420011
pentyl_10mms_0g_run3	1	7	3.1002	0.420305
pentyl_10mms_0g_run3	1	8	3.10481	0.450731
pentyl_10mms_0g_run3	1	9	3.10595	0.435469
pentyl_10mms_0g_run3	1	10	3.10708	0.415133
pentyl_10mms_0g_run3	1	11	3.10821	0.421363
pentyl_10mms_0g_run3	1	12	3.10934	0.42058
pentyl_10mms_0g_run3	1	13	3.11383	0.426065
pentyl_10mms_0g_run3	1	14	3.11496	0.424576
pentyl_10mms_0g_run3	1	15	3.1161	0.415427
pentyl_10mms_0g_run3	1	16	3.11723	0.417151
pentyl_10mms_0g_run3	1	17	3.11836	0.433138
pentyl_10mms_0g_run3	1	18	3.12283	0.435548
pentyl_10mms_0g_run3	1	19	3.12396	0.427985
pentyl_10mms_0g_run3	1	20	3.12509	0.410764
pentyl_10mms_0g_run3	1	21	3.12623	0.455982
pentyl_10mms_0g_run3	1	22	3.12736	0.450046
pentyl_10mms_0g_run3	1	23	3.13183	0.555938
pentyl_10mms_0g_run3	1	24	3.13296	0.567987
pentyl_10mms_0g_run3	1	25	3.1341	0.615811
pentyl_10mms_0g_run3	1	26	3.13523	0.628506
pentyl_10mms_0g_run3	1	27	3.13637	0.662752
pentyl_10mms_0g_run3	1	28	3.14083	0.70074
pentyl_10mms_0g_run3	1	29	3.14197	0.727816
pentyl_10mms_0g_run3	1	30	3.1431	0.722076
pentyl_10mms_0g_run3	1	31	3.14423	0.728463
pentyl_10mms_0g_run3	1	32	3.14537	0.737279
pentyl_10mms_0g_run3	1	33	3.14983	0.778833
pentyl_10mms_0g_run3	1	34	3.15096	0.799091
pentyl_10mms_0g_run3	1	35	3.1521	0.79241
pentyl_10mms_0g_run3	1	36	3.15323	0.816997
pentyl_10mms_0g_run3	1	37	3.15436	0.828615
pentyl_10mms_0g_run3	1	38	3.15883	0.784573
pentyl_10mms_0g_run3	1	39	3.15996	0.764002
pentyl_10mms_0g_run3	1	40	3.1611	0.769801
pentyl_10mms_0g_run3	1	41	3.16223	0.737534
pentyl_10mms_0g_run3	1	42	3.16336	0.733674
pentyl_10mms_0g_run3	1	43	3.16783	0.751796
pentyl_10mms_0g_run3	1	44	3.16896	0.75064
pentyl_10mms_0g_run3	1	45	3.1701	0.757302
pentyl_10mms_0g_run3	1	46	3.17123	0.76218
pentyl_10mms_0g_run3	1	47	3.17236	0.731441
pentyl_10mms_0g_run3	1	48	3.17683	0.728306
pentyl_10mms_0g_run3	1	49	3.17797	0.7334
pentyl_10mms_0g_run3	1	50	3.1791	0.695412
pentyl_10mms_0g_run3	1	51	3.18024	0.715806
pentyl_10mms_0g_run3	1	52	3.18137	0.715728
pentyl_10mms_0g_run3	1	53	3.18583	0.714513
pentyl_10mms_0g_run3	1	54	3.18696	0.716688
pentyl_10mms_0g_run3	1	55	3.1881	0.718863
pentyl_10mms_0g_run3	1	56	3.18923	0.734634
pentyl_10mms_0g_run3	1	57	3.19037	0.691865
pentyl_10mms_0g_run3	1	58	3.19483	0.708891
pentyl_10mms_0g_run3	1	59	3.19596	0.671862
pentyl_10mms_0g_run3	1	60	3.19709	0.720685
pentyl_10mms_0g_run3	1	61	3.19823	0.688261
pentyl_10mms_0g_run3	1	62	3.19936	0.692296
pentyl_10mms_0g_run3	1	63	3.20383	0.725446
pentyl_10mms_0g_run3	1	64	3.20497	0.722389
pentyl_10mms_0g_run3	1	65	3.2061	0.708283
pentyl_10mms_0g_run3	1	66	3.20723	0.688594
pentyl_10mms_0g_run3	1	67	3.20837	0.721315
pentyl_10mms_0g_run3	1	68	3.21284	0.682503
pentyl_10mms_0g_run3	1	69	3.21397	0.71387
pentyl_10mms_0g_run3	1	70	3.2151	0.677312
pentyl_10mms_0g_run3	1	71	3.21623	0.709364
pentyl_10mms_0g_run3	1	72	3.21737	0.694787
pentyl_10mms_0g_run3	1	73	3.22183	0.713164
pentyl_10mms_0g_run3	1	74	3.22297	0.686833
pentyl_10mms_0g_run3	1	75	3.2241	0.693357
pentyl_10mms_0g_run3	1	76	3.22523	0.702134
pentyl_10mms_0g_run3	1	77	3.22637	0.676861
pentyl_10mms_0g_run3	1	78	3.23083	0.673903
pentyl_10mms_0g_run3	1	79	3.23196	0.68409
pentyl_10mms_0g_run3	1	80	3.2331	0.709893
pentyl_10mms_0g_run3	1	81	3.23424	0.680211
pentyl_10mms_0g_run3	1	82	3.23537	0.702761
pentyl_10mms_0g_run3	1	83	3.2398	0.693534
pentyl_10mms_0g_run3	1	84	3.2409	0.690595
pentyl_10mms_0g_run3	1	85	3.24201	0.698667
pentyl_10mms_0g_run3	1	86	3.24311	0.677586
pentyl_10mms_0g_run3	1	87	3.24421	0.696609
pentyl_10mms_0g_run3	1	88	3.24882	0.68603
pentyl_10mms_0g_run3	1	89	3.24996	0.69179
pentyl_10mms_0g_run3	1	90	3.25109	0.685285
pentyl_10mms_0g_run3	1	91	3.25223	0.696707
pentyl_10mms_0g_run3	1	92	3.25336	0.701899
pentyl_10mms_0g_run3	1	93	3.25783	0.693553
pentyl_10mms_0g_run3	1	94	3.25897	0.676234
pentyl_10mms_0g_run3	1	95	3.2601	0.697569
pentyl_10mms_0g_run3	1	96	3.26123	0.688792
pentyl_10mms_0g_run3	1	97	3.26237	0.658268
pentyl_10mms_0g_run3	1	98	3.26683	0.680858
pentyl_10mms_0g_run3	1	99	3.26797	0.699803
pentyl_10mms_0g_run3	1	100	3.2691	0.695316
pentyl_10mms_0g_run3	1	101	3.27024	0.686676
pentyl_10mms_0g_run3	1	102	3.27137	0.720139
pentyl_10mms_0g_run3	1	103	3.27583	0.685932
pentyl_10mms_0g_run3	1	104	3.27697	0.700782
pentyl_10mms_0g_run3	1	105	3.27811	0.673374
pentyl_10mms_0g_run3	1	106	3.27924	0.681974
pentyl_10mms_0g_run3	1	107	3.28037	0.679388
pentyl_10mms_0g_run3	1	108	3.28484	0.704897
pentyl_10mms_0g_run3	1	109	3.28597	0.678859
pentyl_10mms_0g_run3	1	110	3.28711	0.724998
pentyl_10mms_0g_run3	1	111	3.28825	0.694827
pentyl_10mms_0g_run3	1	112	3.28938	0.7153
pentyl_10mms_0g_run3	1	113	3.29384	0.680799
pentyl_10mms_0g_run3	1	114	3.29497	0.688949
pentyl_10mms_0g_run3	1	115	3.29611	0.671081
pentyl_10mms_0g_run3	1	116	3.29725	0.706386
pentyl_10mms_0g_run3	1	117	3.29838	0.693181
pentyl_10mms_0g_run3	1	118	3.30283	0.678252
pentyl_10mms_0g_run3	1	119	3.30397	0.721275
pentyl_10mms_0g_run3	1	120	3.3051	0.698804
pentyl_10mms_0g_run3	1	121	3.30624	0.697354
pentyl_10mms_0g_run3	1	122	3.30737	0.693729
pentyl_10mms_0g_run3	1	123	3.31183	0.686755
pentyl_10mms_0g_run3	1	124	3.31297	0.677939
pentyl_10mms_0g_run3	1	125	3.3141	0.672335
pentyl_10mms_0g_run3	1	126	3.31523	0.694866
pentyl_10mms_0g_run3	1	127	3.31637	0.683287
pentyl_10mms_0g_run3	1	128	3.32084	0.710774
pentyl_10mms_0g_run3	1	129	3.32198	0.692064
pentyl_10mms_0g_run3	1	130	3.32311	0.699391
pentyl_10mms_0g_run3	1	131	3.32424	0.673609
pentyl_10mms_0g_run3	1	132	3.32538	0.698627
pentyl_10mms_0g_run3	1	133	3.32984	0.660835
pentyl_10mms_0g_run3	1	134	3.33097	0.683777
pentyl_10mms_0g_run3	1	135	3.33211	0.678624
pentyl_10mms_0g_run3	1	136	3.33324	0.701507
pentyl_10mms_0g_run3	1	137	3.33438	0.693769
pentyl_10mms_0g_run3	1	138	3.33883	0.683973
pentyl_10mms_0g_run3	1	139	3.33997	0.70282
pentyl_10mms_0g_run3	1	140	3.3411	0.677429
pentyl_10mms_0g_run3	1	141	3.34224	0.689243
pentyl_10mms_0g_run3	1	142	3.34337	0.688067
pentyl_10mms_0g_run3	1	143	3.34784	0.688322
pentyl_10mms_0g_run3	1	144	3.34897	0.677684
pentyl_10mms_0g_run3	1	145	3.35011	0.683601
pentyl_10mms_0g_run3	1	146	3.35124	0.686912
pentyl_10mms_0g_run3	1	147	3.35237	0.686147
pentyl_10mms_0g_run3	1	148	3.35684	0.682562
pentyl_10mms_0g_run3	1	149	3.35797	0.680132
pentyl_10mms_0g_run3	1	150	3.35911	0.683659
pentyl_10mms_0g_run3	1	151	3.36024	0.676469
pentyl_10mms_0g_run3	1	152	3.36138	0.697197
pentyl_10mms_0g_run3	1	153	3.36584	0.680015
pentyl_10mms_0g_run3	1	154	3.36698	0.693846
pentyl_10mms_0g_run3	1	155	3.36811	0.680211
pentyl_10mms_0g_run3	1	156	3.36925	0.704289
pentyl_10mms_0g_run3	1	157	3.37038	0.686402
pentyl_10mms_0g_run3	1	158	3.37484	0.686127
pentyl_10mms_0g_run3	1	159	3.37598	0.677272
pentyl_10mms_0g_run3	1	160	3.37711	0.690339
pentyl_10mms_0g_run3	1	161	3.37825	0.684775
pentyl_10mms_0g_run3	1	162	3.37938	0.659502
pentyl_10mms_0g_run3	1	163	3.38381	0.682405
pentyl_10mms_0g_run3	1	164	3.38491	0.700664
pentyl_10mms_0g_run3	1	165	3.38601	0.679094
pentyl_10mms_0g_run3	1	166	3.38712	0.716494
pentyl_10mms_0g_run3	1	167	3.38822	0.70229
pentyl_10mms_0g_run3	1	168	3.39283	0.691515
pentyl_10mms_0g_run3	1	169	3.39396	0.671375
pentyl_10mms_0g_run3	1	170	3.39509	0.687988
pentyl_10mms_0g_run3	1	171	3.39623	0.657445
pentyl_10mms_0g_run3	1	172	3.39736	0.692553
pentyl_10mms_0g_run3	1	173	3.40184	0.692847
pentyl_10mms_0g_run3	1	174	3.40297	0.695042
pentyl_10mms_0g_run3	1	175	3.40411	0.694983
pentyl_10mms_0g_run3	1	176	3.40524	0.707286
pentyl_10mms_0g_run3	1	177	3.40638	0.674784
pentyl_10mms_0g_run3	1	178	3.41084	0.688145
pentyl_10mms_0g_run3	1	179	3.41198	0.664047
pentyl_10mms_0g_run3	1	180	3.41311	0.676018
pentyl_10mms_0g_run3	1	181	3.41425	0.655329
pentyl_10mms_0g_run3	1	182	3.41538	0.683286
pentyl_10mms_0g_run3	1	183	3.41984	0.684501
pentyl_10mms_0g_run3	1	184	3.42097	0.703544
pentyl_10mms_0g_run3	1	185	3.42211	0.698039
pentyl_10mms_0g_run3	1	186	3.42324	0.680642
pentyl_10mms_0g_run3	1	187	3.42438	0.688831
pentyl_10mms_0g_run3	1	188	3.42885	0.650666
pentyl_10mms_0g_run3	1	189	3.42998	0.668064
pentyl_10mms_0g_run3	1	190	3.43111	0.656838
pentyl_10mms_0g_run3	1	191	3.43225	0.688047
pentyl_10mms_0g_run3	1	192	3.43338	0.684384
pentyl_10mms_0g_run3	1	193	3.43784	0.707874
pentyl_10mms_0g_run3	1	194	3.43897	0.668201
pentyl_10mms_0g_run3	1	195	3.44011	0.677429
pentyl_10mms_0g_run3	1	196	3.44124	0.693611
pentyl_10mms_0g_run3	1	197	3.44237	0.669102
pentyl_10mms_0g_run3	1	198	3.44684	0.676821
pentyl_10mms_0g_run3	1	199	3.44797	0.667319
pentyl_10mms_0g_run3	1	200	3.44911	0.69753
pentyl_10mms_0g_run3	1	201	3.45024	0.681171
pentyl_10mms_0g_run3	1	202	3.45138	0.685951
pentyl_10mms_0g_run3	1	203	3.45584	0.681915
pentyl_10mms_0g_run3	1	204	3.45697	0.693435
pentyl_10mms_0g_run3	1	205	3.45811	0.677742
pentyl_10mms_0g_run3	1	206	3.45924	0.673765
pentyl_10mms_0g_run3	1	207	3.46037	0.693572
pentyl_10mms_0g_run3	1	208	3.46485	0.687871
pentyl_10mms_0g_run3	1	209	3.46598	0.68266
pentyl_10mms_0g_run3	1	210	3.46711	0.672981
pentyl_10mms_0g_run3	1	211	3.46824	0.693533
pentyl_10mms_0g_run3	1	212	3.46938	0.6788
pentyl_10mms_0g_run3	1	213	3.47385	0.690065
pentyl_10mms_0g_run3	1	214	3.47498	0.659247
pentyl_10mms_0g_run3	1	215	3.47612	0.6903
pentyl_10mms_0g_run3	1	216	3.47725	0.669768
pentyl_10mms_0g_run3	1	217	3.47839	0.678937
pentyl_10mms_0g_run3	1	218	3.48284	0.675587
pentyl_10mms_0g_run3	1	219	3.48398	0.682209
pentyl_10mms_0g_run3	1	220	3.48511	0.694591
pentyl_10mms_0g_run3	1	221	3.48625	0.669082
pentyl_10mms_0g_run3	1	222	3.48738	0.702192
pentyl_10mms_0g_run3	1	223	3.49185	0.671394
pentyl_10mms_0g_run3	1	224	3.49298	0.684403
pentyl_10mms_0g_run3	1	225	3.49412	0.668299
pentyl_10mms_0g_run3	1	226	3.49525	0.685226
pentyl_10mms_0g_run3	1	227	3.49639	0.648079
pentyl_10mms_0g_run3	1	228	3.50084	0.688105
pentyl_10mms_0g_run3	1	229	3.50198	0.678877
pentyl_10mms_0g_run3	1	230	3.50311	0.670864
pentyl_10mms_0g_run3	1	231	3.50425	0.705953
pentyl_10mms_0g_run3	1	232	3.50538	0.682756
pentyl_10mms_0g_run3	1	233	3.50985	0.680621
pentyl_10mms_0g_run3	1	234	3.51098	0.671236
pentyl_10mms_0g_run3	1	235	3.51212	0.664164
pentyl_10mms_0g_run3	1	236	3.51325	0.661382
pentyl_10mms_0g_run3	1	237	3.51439	0.671295
pentyl_10mms_0g_run3	1	238	3.51884	0.663831
pentyl_10mms_0g_run3	1	239	3.51998	0.688105
pentyl_10mms_0g_run3	1	240	3.52111	0.70417
pentyl_10mms_0g_run3	1	241	3.52225	0.663223
pentyl_10mms_0g_run3	1	242	3.52338	0.69169
pentyl_10mms_0g_run3	1	243	3.52781	0.652507
pentyl_10mms_0g_run3	1	244	3.52891	0.582075
pentyl_10mms_0g_run3	1	245	3.53002	0.602078
pentyl_10mms_0g_run3	1	246	3.53112	0.565402
pentyl_10mms_0g_run3	1	247	3.53222	0.571789
pentyl_10mms_0g_run3	1	248	3.53683	0.532997
pentyl_10mms_0g_run3	1	249	3.53797	0.557507
pentyl_10mms_0g_run3	1	250	3.5391	0.512935
pentyl_10mms_0g_run3	1	251	3.54024	0.548396
pentyl_10mms_0g_run3	1	252	3.54137	0.523201
pentyl_10mms_0g_run3	1	253	3.54585	0.52567
pentyl_10mms_0g_run3	1	254	3.54698	0.551805
pentyl_10mms_0g_run3	1	255	3.54812	0.547652
pentyl_10mms_0g_run3	1	256	3.54925	0.54054
pentyl_10mms_0g_run3	1	257	3.55039	0.555469
pentyl_10mms_0g_run3	1	258	3.55484	0.532782
pentyl_10mms_0g_run3	1	259	3.55598	0.548338
pentyl_10mms_0g_run3	1	260	3.55711	0.518362
pentyl_10mms_0g_run3	1	261	3.55825	0.516834
pentyl_10mms_0g_run3	1	262	3.55938	0.532821
pentyl_10mms_0g_run3	1	263	3.56385	0.547319
pentyl_10mms_0g_run3	1	264	3.56498	0.525259
pentyl_10mms_0g_run3	1	265	3.56611	0.529255
pentyl_10mms_0g_run3	1	266	3.56725	0.539972
pentyl_10mms_0g_run3	1	267	3.56839	0.520988
pentyl_10mms_0g_run3	1	268	3.57285	0.52424
pentyl_10mms_0g_run3	2	1	4.13987	0.434136
pentyl_10mms_0g_run3	2	2	4.14101	0.437839
pentyl_10mms_0g_run3	2	3	4.14214	0.444461
pentyl_10mms_0g_run3	2	4	4.14328	0.430688
pentyl_10mms_0g_run3	2	5	4.14441	0.448849
pentyl_10mms_0g_run3	2	6	4.14888	0.439484
pentyl_10mms_0g_run3	2	7	4.15002	0.440993
pentyl_10mms_0g_run3	2	8	4.15115	0.430942
pentyl_10mms_0g_run3	2	9	4.15228	0.451749
pentyl_10mms_0g_run3	2	10	4.15341	0.435625
pentyl_10mms_0g_run3	2	11	4.15788	0.447458
pentyl_10mms_0g_run3	2	12	4.15901	0.427632
pentyl_10mms_0g_run3	2	13	4.16014	0.442306
pentyl_10mms_0g_run3	2	14	4.16128	0.435213
pentyl_10mms_0g_run3	2	15	4.16241	0.39411
pentyl_10mms_0g_run3	2	16	4.16687	0.429904
pentyl_10mms_0g_run3	2	17	4.16801	0.432353
pentyl_10mms_0g_run3	2	18	4.16914	0.448516
pentyl_10mms_0g_run3	2	19	4.17027	0.433372
pentyl_10mms_0g_run3	2	20	4.17141	0.462113
pentyl_10mms_0g_run3	2	21	4.17587	0.426926
pentyl_10mms_0g_run3	2	22	4.17701	0.442266
pentyl_10mms_0g_run3	2	23	4.17814	0.433235
pentyl_10mms_0g_run3	2	24	4.17928	0.416543
pentyl_10mms_0g_run3	2	25	4.18041	0.439426
pentyl_10mms_0g_run3	2	26	4.18488	0.448418
pentyl_10mms_0g_run3	2	27	4.18601	0.431217
pentyl_10mms_0g_run3	2	28	4.18715	0.436507
pentyl_10mms_0g_run3	2	29	4.18828	0.465169
pentyl_10mms_0g_run3	2	30	4.18941	0.444402
pentyl_10mms_0g_run3	2	31	4.19388	0.475807
pentyl_10mms_0g_run3	2	32	4.19501	0.479373
pentyl_10mms_0g_run3	2	33	4.19614	0.5174
pentyl_10mms_0g_run3	2	34	4.19728	0.557818
pentyl_10mms_0g_run3	2	35	4.19841	0.56493
pentyl_10mms_0g_run3	2	36	4.20287	0.680226
pentyl_10mms_0g_run3	2	37	4.20401	0.732007
pentyl_10mms_0g_run3	2	38	4.20514	0.733182
pentyl_10mms_0g_run3	2	39	4.20628	0.724053
pentyl_10mms_0g_run3	2	40	4.20741	0.741568
pentyl_10mms_0g_run3	2	41	4.21188	0.760238
pentyl_10mms_0g_run3	2	42	4.21302	0.750599
pentyl_10mms_0g_run3	2	43	4.21415	0.793583
pentyl_10mms_0g_run3	2	44	4.21529	0.805769
pentyl_10mms_0g_run3	2	45	4.21642	0.782142
pentyl_10mms_0g_run3	2	46	4.22088	0.836783
pentyl_10mms_0g_run3	2	47	4.22201	0.80861
pentyl_10mms_0g_run3	2	48	4.22314	0.807415
pentyl_10mms_0g_run3	2	49	4.22428	0.796993
pentyl_10mms_0g_run3	2	50	4.22541	0.771837
pentyl_10mms_0g_run3	2	51	4.22988	0.737787
pentyl_10mms_0g_run3	2	52	4.23101	0.758221
pentyl_10mms_0g_run3	2	53	4.23215	0.762962
pentyl_10mms_0g_run3	2	54	4.23328	0.752872
pentyl_10mms_0g_run3	2	55	4.23441	0.76451
pentyl_10mms_0g_run3	2	56	4.23888	0.749444
pentyl_10mms_0g_run3	2	57	4.24001	0.752911
pentyl_10mms_0g_run3	2	58	4.24114	0.72801
pentyl_10mms_0g_run3	2	59	4.24228	0.732321
pentyl_10mms_0g_run3	2	60	4.24341	0.744781
pentyl_10mms_0g_run3	2	61	4.24785	0.719606
pentyl_10mms_0g_run3	2	62	4.24895	0.707185
pentyl_10mms_0g_run3	2	63	4.25005	0.727384
pentyl_10mms_0g_run3	2	64	4.25115	0.723798
pentyl_10mms_0g_run3	2	65	4.25226	0.702267
pentyl_10mms_0g_run3	2	66	4.25687	0.714747
pentyl_10mms_0g_run3	2	67	4.258	0.699505
pentyl_10mms_0g_run3	2	68	4.25914	0.707537
pentyl_10mms_0g_run3	2	69	4.26027	0.711887
pentyl_10mms_0g_run3	2	70	4.2614	0.696292
pentyl_10mms_0g_run3	2	71	4.26588	0.692432
pentyl_10mms_0g_run3	2	72	4.26701	0.729421
pentyl_10mms_0g_run3	2	73	4.26815	0.703031
pentyl_10mms_0g_run3	2	74	4.26928	0.692099
pentyl_10mms_0g_run3	2	75	4.27042	0.71314
pentyl_10mms_0g_run3	2	76	4.27488	0.693275
pentyl_10mms_0g_run3	2	77	4.27602	0.699348
pentyl_10mms_0g_run3	2	78	4.27715	0.683048
pentyl_10mms_0g_run3	2	79	4.27828	0.704285
pentyl_10mms_0g_run3	2	80	4.27942	0.666787
pentyl_10mms_0g_run3	2	81	4.28388	0.709908
pentyl_10mms_0g_run3	2	82	4.28501	0.682401
pentyl_10mms_0g_run3	2	83	4.28615	0.703423
pentyl_10mms_0g_run3	2	84	4.28728	0.716177
pentyl_10mms_0g_run3	2	85	4.28842	0.699857
pentyl_10mms_0g_run3	2	86	4.29289	0.67764
pentyl_10mms_0g_run3	2	87	4.29402	0.695567
pentyl_10mms_0g_run3	2	88	4.29515	0.69445
pentyl_10mms_0g_run3	2	89	4.29629	0.665513
pentyl_10mms_0g_run3	2	90	4.29743	0.71267
pentyl_10mms_0g_run3	2	91	4.30188	0.688102
pentyl_10mms_0g_run3	2	92	4.30301	0.706479
pentyl_10mms_0g_run3	2	93	4.30414	0.719175
pentyl_10mms_0g_run3	2	94	4.30528	0.696213
pentyl_10mms_0g_run3	2	95	4.30641	0.710358
pentyl_10mms_0g_run3	2	96	4.31088	0.699563
pentyl_10mms_0g_run3	2	97	4.31202	0.679325
pentyl_10mms_0g_run3	2	98	4.31315	0.664377
pentyl_10mms_0g_run3	2	99	4.31429	0.699172
pentyl_10mms_0g_run3	2	100	4.31542	0.68628
pentyl_10mms_0g_run3	2	101	4.31988	0.701816
pentyl_10mms_0g_run3	2	102	4.32101	0.697134
pentyl_10mms_0g_run3	2	103	4.32215	0.710633
pentyl_10mms_0g_run3	2	104	4.32328	0.698564
pentyl_10mms_0g_run3	2	105	4.32442	0.683714
pentyl_10mms_0g_run3	2	106	4.32889	0.669823
pentyl_10mms_0g_run3	2	107	4.33002	0.679247
pentyl_10mms_0g_run3	2	108	4.33116	0.669216
pentyl_10mms_0g_run3	2	109	4.33229	0.685595
pentyl_10mms_0g_run3	2	110	4.33343	0.688612
pentyl_10mms_0g_run3	2	111	4.33788	0.706499
pentyl_10mms_0g_run3	2	112	4.33901	0.715687
pentyl_10mms_0g_run3	2	113	4.34015	0.682636
pentyl_10mms_0g_run3	2	114	4.34128	0.693059
pentyl_10mms_0g_run3	2	115	4.34242	0.685575
pentyl_10mms_0g_run3	2	116	4.34688	0.688259
pentyl_10mms_0g_run3	2	117	4.34801	0.67237
pentyl_10mms_0g_run3	2	118	4.34915	0.684772
pentyl_10mms_0g_run3	2	119	4.35028	0.681559
pentyl_10mms_0g_run3	2	120	4.35142	0.680227
pentyl_10mms_0g_run3	2	121	4.35589	0.65993
pentyl_10mms_0g_run3	2	122	4.35702	0.693353
pentyl_10mms_0g_run3	2	123	4.35816	0.683185
[truncated: 32,813 more rows]

## Sheet: C6
VariableName	CellIndex	RowIndex	Time (s)	Force (N)
hexyl_10mms_0g_run1	1	1	3.4865	0.565428
hexyl_10mms_0g_run1	1	2	3.48763	0.472406
hexyl_10mms_0g_run1	1	3	3.4921	0.481261
hexyl_10mms_0g_run1	1	4	3.49324	0.553242
hexyl_10mms_0g_run1	1	5	3.49437	0.521503
hexyl_10mms_0g_run1	1	6	3.49551	0.541545
hexyl_10mms_0g_run1	1	7	3.49664	0.568249
hexyl_10mms_0g_run1	1	8	3.5011	0.521385
hexyl_10mms_0g_run1	1	9	3.50224	0.624439
hexyl_10mms_0g_run1	1	10	3.50337	0.465529
hexyl_10mms_0g_run1	1	11	3.5045	0.589095
hexyl_10mms_0g_run1	1	12	3.50563	0.554829
hexyl_10mms_0g_run1	1	13	3.5101	0.619717
hexyl_10mms_0g_run1	1	14	3.51123	0.486061
hexyl_10mms_0g_run1	1	15	3.51237	0.550812
hexyl_10mms_0g_run1	1	16	3.5135	0.571482
hexyl_10mms_0g_run1	1	17	3.51464	0.485552
hexyl_10mms_0g_run1	1	18	3.5191	0.544053
hexyl_10mms_0g_run1	1	19	3.52023	0.503419
hexyl_10mms_0g_run1	1	20	3.52137	0.592582
hexyl_10mms_0g_run1	1	21	3.5225	0.492213
hexyl_10mms_0g_run1	1	22	3.52364	0.575831
hexyl_10mms_0g_run1	1	23	3.52807	0.522424
hexyl_10mms_0g_run1	1	24	3.52917	0.544053
hexyl_10mms_0g_run1	1	25	3.53027	0.549833
hexyl_10mms_0g_run1	1	26	3.53137	0.531593
hexyl_10mms_0g_run1	1	27	3.53248	0.65318
hexyl_10mms_0g_run1	1	28	3.53709	0.612566
hexyl_10mms_0g_run1	1	29	3.53822	0.760857
hexyl_10mms_0g_run1	1	30	3.53936	0.729177
hexyl_10mms_0g_run1	1	31	3.54049	0.798336
hexyl_10mms_0g_run1	1	32	3.54163	0.839871
hexyl_10mms_0g_run1	1	33	3.5461	0.966258
hexyl_10mms_0g_run1	1	34	3.54724	0.879368
hexyl_10mms_0g_run1	1	35	3.54837	0.994373
hexyl_10mms_0g_run1	1	36	3.5495	0.987065
hexyl_10mms_0g_run1	1	37	3.55064	0.939378
hexyl_10mms_0g_run1	1	38	3.5551	1.00866
hexyl_10mms_0g_run1	1	39	3.55624	1.06218
hexyl_10mms_0g_run1	1	40	3.55737	1.12754
hexyl_10mms_0g_run1	1	41	3.5585	0.98348
hexyl_10mms_0g_run1	1	42	3.55964	1.18338
hexyl_10mms_0g_run1	1	43	3.5641	1.04845
hexyl_10mms_0g_run1	1	44	3.56523	1.17103
hexyl_10mms_0g_run1	1	45	3.56637	1.04521
hexyl_10mms_0g_run1	1	46	3.5675	1.09267
hexyl_10mms_0g_run1	1	47	3.56863	1.10593
hexyl_10mms_0g_run1	1	48	3.57311	1.15409
hexyl_10mms_0g_run1	1	49	3.57424	0.998115
hexyl_10mms_0g_run1	1	50	3.57538	1.12174
hexyl_10mms_0g_run1	1	51	3.57651	1.04157
hexyl_10mms_0g_run1	1	52	3.57764	1.02887
hexyl_10mms_0g_run1	1	53	3.5821	1.04641
hexyl_10mms_0g_run1	1	54	3.58324	1.05581
hexyl_10mms_0g_run1	1	55	3.58437	1.11943
hexyl_10mms_0g_run1	1	56	3.5855	1.02817
hexyl_10mms_0g_run1	1	57	3.58664	1.0754
hexyl_10mms_0g_run1	1	58	3.5911	1.01283
hexyl_10mms_0g_run1	1	59	3.59224	1.0718
hexyl_10mms_0g_run1	1	60	3.59337	1.0343
hexyl_10mms_0g_run1	1	61	3.59451	1.04286
hexyl_10mms_0g_run1	1	62	3.59564	1.07954
hexyl_10mms_0g_run1	1	63	3.6001	1.06976
hexyl_10mms_0g_run1	1	64	3.60123	1.11428
hexyl_10mms_0g_run1	1	65	3.60237	0.977151
hexyl_10mms_0g_run1	1	66	3.6035	1.10142
hexyl_10mms_0g_run1	1	67	3.60464	1.00672
hexyl_10mms_0g_run1	1	68	3.60911	1.02793
hexyl_10mms_0g_run1	1	69	3.61024	1.00556
hexyl_10mms_0g_run1	1	70	3.61137	1.0718
hexyl_10mms_0g_run1	1	71	3.61251	1.01953
hexyl_10mms_0g_run1	1	72	3.61364	1.00346
hexyl_10mms_0g_run1	1	73	3.61811	0.994588
hexyl_10mms_0g_run1	1	74	3.61924	1.03657
hexyl_10mms_0g_run1	1	75	3.62037	1.08324
hexyl_10mms_0g_run1	1	76	3.6215	0.953641
hexyl_10mms_0g_run1	1	77	3.62264	1.11194
hexyl_10mms_0g_run1	1	78	3.6271	0.993687
hexyl_10mms_0g_run1	1	79	3.62824	1.09039
hexyl_10mms_0g_run1	1	80	3.62937	0.967708
hexyl_10mms_0g_run1	1	81	3.6305	1.05248
hexyl_10mms_0g_run1	1	82	3.63164	1.04151
hexyl_10mms_0g_run1	1	83	3.63611	1.10197
hexyl_10mms_0g_run1	1	84	3.63724	0.936694
hexyl_10mms_0g_run1	1	85	3.63838	1.07213
hexyl_10mms_0g_run1	1	86	3.63951	1.03001
hexyl_10mms_0g_run1	1	87	3.64064	0.966023
hexyl_10mms_0g_run1	1	88	3.64511	0.960381
hexyl_10mms_0g_run1	1	89	3.64624	1.01087
hexyl_10mms_0g_run1	1	90	3.64737	1.06788
hexyl_10mms_0g_run1	1	91	3.64851	0.970451
hexyl_10mms_0g_run1	1	92	3.64964	1.01202
hexyl_10mms_0g_run1	1	93	3.65411	0.981344
hexyl_10mms_0g_run1	1	94	3.65524	1.06071
hexyl_10mms_0g_run1	1	95	3.65637	1.01304
hexyl_10mms_0g_run1	1	96	3.65751	0.990102
hexyl_10mms_0g_run1	1	97	3.65864	1.05581
hexyl_10mms_0g_run1	1	98	3.66311	1.04175
hexyl_10mms_0g_run1	1	99	3.66424	1.02106
hexyl_10mms_0g_run1	1	100	3.66537	0.952231
hexyl_10mms_0g_run1	1	101	3.66651	1.0727
hexyl_10mms_0g_run1	1	102	3.66764	0.996195
hexyl_10mms_0g_run1	1	103	3.67207	1.00098
hexyl_10mms_0g_run1	1	104	3.67317	1.04459
hexyl_10mms_0g_run1	1	105	3.67427	0.976329
hexyl_10mms_0g_run1	1	106	3.67537	1.03587
hexyl_10mms_0g_run1	1	107	3.67648	0.950448
hexyl_10mms_0g_run1	1	108	3.6811	1.04028
hexyl_10mms_0g_run1	1	109	3.68223	0.971568
hexyl_10mms_0g_run1	1	110	3.68336	1.01393
hexyl_10mms_0g_run1	1	111	3.6845	1.04817
hexyl_10mms_0g_run1	1	112	3.68563	0.96857
hexyl_10mms_0g_run1	1	113	3.69011	0.995333
hexyl_10mms_0g_run1	1	114	3.69124	1.07474
hexyl_10mms_0g_run1	1	115	3.69237	0.917749
hexyl_10mms_0g_run1	1	116	3.69351	1.0509
hexyl_10mms_0g_run1	1	117	3.69464	1.00938
hexyl_10mms_0g_run1	1	118	3.69911	1.08984
hexyl_10mms_0g_run1	1	119	3.70024	0.993236
hexyl_10mms_0g_run1	1	120	3.70138	1.04198
hexyl_10mms_0g_run1	1	121	3.70251	1.03426
hexyl_10mms_0g_run1	1	122	3.70364	0.973938
hexyl_10mms_0g_run1	1	123	3.70811	0.990944
hexyl_10mms_0g_run1	1	124	3.70924	0.949115
hexyl_10mms_0g_run1	1	125	3.71037	1.04907
hexyl_10mms_0g_run1	1	126	3.7115	1.03789
hexyl_10mms_0g_run1	1	127	3.71263	0.925135
hexyl_10mms_0g_run1	1	128	3.71711	1.01128
hexyl_10mms_0g_run1	1	129	3.71825	1.06675
hexyl_10mms_0g_run1	1	130	3.71938	0.957168
hexyl_10mms_0g_run1	1	131	3.72051	1.0451
hexyl_10mms_0g_run1	1	132	3.72165	1.02315
hexyl_10mms_0g_run1	1	133	3.72611	1.0047
hexyl_10mms_0g_run1	1	134	3.72724	1.04602
hexyl_10mms_0g_run1	1	135	3.72837	0.910147
hexyl_10mms_0g_run1	1	136	3.7295	1.06396
hexyl_10mms_0g_run1	1	137	3.73064	0.976858
hexyl_10mms_0g_run1	1	138	3.73511	1.06579
hexyl_10mms_0g_run1	1	139	3.73624	0.930366
hexyl_10mms_0g_run1	1	140	3.73737	1.04574
hexyl_10mms_0g_run1	1	141	3.73851	1.02033
hexyl_10mms_0g_run1	1	142	3.73964	0.949174
hexyl_10mms_0g_run1	1	143	3.74411	0.929034
hexyl_10mms_0g_run1	1	144	3.74525	1.0296
hexyl_10mms_0g_run1	1	145	3.74638	1.05123
hexyl_10mms_0g_run1	1	146	3.74751	0.934872
hexyl_10mms_0g_run1	1	147	3.74864	1.04706
hexyl_10mms_0g_run1	1	148	3.75311	1.01922
hexyl_10mms_0g_run1	1	149	3.75424	1.06424
hexyl_10mms_0g_run1	1	150	3.75537	0.942807
hexyl_10mms_0g_run1	1	151	3.75651	1.05867
hexyl_10mms_0g_run1	1	152	3.75765	0.969491
hexyl_10mms_0g_run1	1	153	3.76211	1.07664
hexyl_10mms_0g_run1	1	154	3.76324	0.922901
hexyl_10mms_0g_run1	1	155	3.76438	1.04768
hexyl_10mms_0g_run1	1	156	3.76551	0.986144
hexyl_10mms_0g_run1	1	157	3.76665	0.964378
hexyl_10mms_0g_run1	1	158	3.77111	0.983597
hexyl_10mms_0g_run1	1	159	3.77224	0.986791
hexyl_10mms_0g_run1	1	160	3.77338	1.03544
hexyl_10mms_0g_run1	1	161	3.77451	0.969667
hexyl_10mms_0g_run1	1	162	3.77564	0.948528
hexyl_10mms_0g_run1	1	163	3.78012	0.994725
hexyl_10mms_0g_run1	1	164	3.78125	1.04169
hexyl_10mms_0g_run1	1	165	3.78238	0.968002
hexyl_10mms_0g_run1	1	166	3.78352	1.05446
hexyl_10mms_0g_run1	1	167	3.78465	1.06148
hexyl_10mms_0g_run1	1	168	3.78911	1.039
hexyl_10mms_0g_run1	1	169	3.79024	1.03669
hexyl_10mms_0g_run1	1	170	3.79138	0.934324
hexyl_10mms_0g_run1	1	171	3.79251	1.04118
hexyl_10mms_0g_run1	1	172	3.79365	0.970667
hexyl_10mms_0g_run1	1	173	3.79811	1.02333
hexyl_10mms_0g_run1	1	174	3.79925	0.97104
hexyl_10mms_0g_run1	1	175	3.80038	1.07488
hexyl_10mms_0g_run1	1	176	3.80151	0.993982
hexyl_10mms_0g_run1	1	177	3.80265	0.990612
hexyl_10mms_0g_run1	1	178	3.80711	0.93405
hexyl_10mms_0g_run1	1	179	3.80824	1.01195
hexyl_10mms_0g_run1	1	180	3.80938	1.01888
hexyl_10mms_0g_run1	1	181	3.81051	0.936538
hexyl_10mms_0g_run1	1	182	3.81165	1.07768
hexyl_10mms_0g_run1	1	183	3.81608	1.04098
hexyl_10mms_0g_run1	1	184	3.81718	0.98017
hexyl_10mms_0g_run1	1	185	3.81828	1.06324
hexyl_10mms_0g_run1	1	186	3.81939	0.936676
hexyl_10mms_0g_run1	1	187	3.82049	1.05286
hexyl_10mms_0g_run1	1	188	3.8251	0.954524
hexyl_10mms_0g_run1	1	189	3.82623	1.06528
hexyl_10mms_0g_run1	1	190	3.82736	0.938791
hexyl_10mms_0g_run1	1	191	3.8285	1.02913
hexyl_10mms_0g_run1	1	192	3.82964	1.00846
hexyl_10mms_0g_run1	1	193	3.83412	0.955033
hexyl_10mms_0g_run1	1	194	3.83525	1.00413
hexyl_10mms_0g_run1	1	195	3.83638	1.05035
hexyl_10mms_0g_run1	1	196	3.83751	0.991709
hexyl_10mms_0g_run1	1	197	3.83864	0.951507
hexyl_10mms_0g_run1	1	198	3.84311	0.963027
hexyl_10mms_0g_run1	1	199	3.84425	1.02991
hexyl_10mms_0g_run1	1	200	3.84538	0.982579
hexyl_10mms_0g_run1	1	201	3.84652	0.990142
hexyl_10mms_0g_run1	1	202	3.84765	1.08132
hexyl_10mms_0g_run1	1	203	3.85211	1.01201
hexyl_10mms_0g_run1	1	204	3.85325	1.01714
hexyl_10mms_0g_run1	1	205	3.85438	0.939477
hexyl_10mms_0g_run1	1	206	3.85552	1.05756
hexyl_10mms_0g_run1	1	207	3.85665	0.944826
hexyl_10mms_0g_run1	1	208	3.86112	0.966847
hexyl_10mms_0g_run1	1	209	3.86225	0.972744
hexyl_10mms_0g_run1	1	210	3.86339	1.05237
hexyl_10mms_0g_run1	1	211	3.86452	0.956542
hexyl_10mms_0g_run1	1	212	3.86565	1.01097
hexyl_10mms_0g_run1	1	213	3.87012	0.928231
hexyl_10mms_0g_run1	1	214	3.87125	1.04567
hexyl_10mms_0g_run1	1	215	3.87238	1.00697
hexyl_10mms_0g_run1	1	216	3.87352	0.94416
hexyl_10mms_0g_run1	1	217	3.87465	1.07656
hexyl_10mms_0g_run1	1	218	3.87912	1.00881
hexyl_10mms_0g_run1	1	219	3.88025	1.03659
hexyl_10mms_0g_run1	1	220	3.88138	0.920708
hexyl_10mms_0g_run1	1	221	3.88252	1.07117
hexyl_10mms_0g_run1	1	222	3.88365	1.02123
hexyl_10mms_0g_run1	1	223	3.88812	1.07913
hexyl_10mms_0g_run1	1	224	3.88925	0.915183
hexyl_10mms_0g_run1	1	225	3.89038	1.04375
hexyl_10mms_0g_run1	1	226	3.89152	0.97055
hexyl_10mms_0g_run1	1	227	3.89265	0.943513
hexyl_10mms_0g_run1	1	228	3.89712	0.921727
hexyl_10mms_0g_run1	1	229	3.89825	1.03491
hexyl_10mms_0g_run1	1	230	3.89938	1.03648
hexyl_10mms_0g_run1	1	231	3.90052	0.973861
hexyl_10mms_0g_run1	1	232	3.90165	1.05146
hexyl_10mms_0g_run1	1	233	3.90612	0.970863
hexyl_10mms_0g_run1	1	234	3.90725	1.03804
hexyl_10mms_0g_run1	1	235	3.90838	0.963301
hexyl_10mms_0g_run1	1	236	3.90952	0.991533
hexyl_10mms_0g_run1	1	237	3.91065	1.01937
hexyl_10mms_0g_run1	1	238	3.91512	1.01779
hexyl_10mms_0g_run1	1	239	3.91625	1.01773
hexyl_10mms_0g_run1	1	240	3.91738	0.959716
hexyl_10mms_0g_run1	1	241	3.91852	1.08834
hexyl_10mms_0g_run1	1	242	3.91965	0.949547
hexyl_10mms_0g_run1	1	243	3.92412	0.95805
hexyl_10mms_0g_run1	1	244	3.92526	0.9576
hexyl_10mms_0g_run1	1	245	3.92639	0.998253
hexyl_10mms_0g_run1	1	246	3.92753	0.948666
hexyl_10mms_0g_run1	1	247	3.92866	1.02948
hexyl_10mms_0g_run1	1	248	3.93312	0.897392
hexyl_10mms_0g_run1	1	249	3.93425	1.0181
hexyl_10mms_0g_run1	1	250	3.93539	0.895649
hexyl_10mms_0g_run1	1	251	3.93652	0.868435
hexyl_10mms_0g_run1	1	252	3.93766	0.934029
hexyl_10mms_0g_run1	1	253	3.94212	0.82022
hexyl_10mms_0g_run1	1	254	3.94325	0.822159
hexyl_10mms_0g_run1	1	255	3.94439	0.715403
hexyl_10mms_0g_run1	1	256	3.94552	0.877467
hexyl_10mms_0g_run1	1	257	3.94665	0.756194
hexyl_10mms_0g_run1	1	258	3.95112	0.889947
hexyl_10mms_0g_run1	1	259	3.95225	0.74389
hexyl_10mms_0g_run1	1	260	3.95339	0.878584
hexyl_10mms_0g_run1	1	261	3.95452	0.75445
hexyl_10mms_0g_run1	1	262	3.95566	0.785797
hexyl_10mms_0g_run1	1	263	3.96009	0.6839
hexyl_10mms_0g_run1	1	264	3.96119	0.803567
hexyl_10mms_0g_run1	1	265	3.9623	0.809875
hexyl_10mms_0g_run1	1	266	3.9634	0.729842
hexyl_10mms_0g_run1	1	267	3.9645	0.811051
hexyl_10mms_0g_run1	1	268	3.96911	0.731214
hexyl_10mms_0g_run1	2	1	4.9367	0.594504
hexyl_10mms_0g_run1	2	2	4.94117	0.554439
hexyl_10mms_0g_run1	2	3	4.9423	0.561511
hexyl_10mms_0g_run1	2	4	4.94343	0.466353
hexyl_10mms_0g_run1	2	5	4.94457	0.595386
hexyl_10mms_0g_run1	2	6	4.9457	0.483535
hexyl_10mms_0g_run1	2	7	4.95017	0.609649
hexyl_10mms_0g_run1	2	8	4.9513	0.478324
hexyl_10mms_0g_run1	2	9	4.95243	0.593662
hexyl_10mms_0g_run1	2	10	4.95356	0.557475
hexyl_10mms_0g_run1	2	11	4.9547	0.494213
hexyl_10mms_0g_run1	2	12	4.95917	0.453795
hexyl_10mms_0g_run1	2	13	4.9603	0.541939
hexyl_10mms_0g_run1	2	14	4.96143	0.566723
hexyl_10mms_0g_run1	2	15	4.96257	0.483477
hexyl_10mms_0g_run1	2	16	4.9637	0.603438
hexyl_10mms_0g_run1	2	17	4.96813	0.600519
hexyl_10mms_0g_run1	2	18	4.96924	0.520074
hexyl_10mms_0g_run1	2	19	4.97034	0.589371
hexyl_10mms_0g_run1	2	20	4.97144	0.474406
hexyl_10mms_0g_run1	2	21	4.97254	0.626008
hexyl_10mms_0g_run1	2	22	4.97715	0.56782
hexyl_10mms_0g_run1	2	23	4.97829	0.720049
hexyl_10mms_0g_run1	2	24	4.97942	0.610393
hexyl_10mms_0g_run1	2	25	4.98056	0.779785
hexyl_10mms_0g_run1	2	26	4.98169	0.762153
hexyl_10mms_0g_run1	2	27	4.98617	0.855254
hexyl_10mms_0g_run1	2	28	4.9873	0.870888
hexyl_10mms_0g_run1	2	29	4.98843	0.967006
hexyl_10mms_0g_run1	2	30	4.98957	0.897259
hexyl_10mms_0g_run1	2	31	4.9907	0.942007
hexyl_10mms_0g_run1	2	32	4.99517	0.950745
hexyl_10mms_0g_run1	2	33	4.9963	1.05948
hexyl_10mms_0g_run1	2	34	4.99743	1.07647
hexyl_10mms_0g_run1	2	35	4.99857	0.983757
hexyl_10mms_0g_run1	2	36	4.9997	1.15981
hexyl_10mms_0g_run1	2	37	5.00417	1.10448
hexyl_10mms_0g_run1	2	38	5.0053	1.16663
hexyl_10mms_0g_run1	2	39	5.00643	1.02059
hexyl_10mms_0g_run1	2	40	5.00756	1.13258
hexyl_10mms_0g_run1	2	41	5.0087	1.08634
hexyl_10mms_0g_run1	2	42	5.01317	1.12014
hexyl_10mms_0g_run1	2	43	5.0143	1.01826
hexyl_10mms_0g_run1	2	44	5.01544	1.17302
hexyl_10mms_0g_run1	2	45	5.01657	1.06316
hexyl_10mms_0g_run1	2	46	5.01771	1.12935
hexyl_10mms_0g_run1	2	47	5.02217	1.02222
hexyl_10mms_0g_run1	2	48	5.0233	1.1305
hexyl_10mms_0g_run1	2	49	5.02443	1.11563
hexyl_10mms_0g_run1	2	50	5.02557	1.00748
hexyl_10mms_0g_run1	2	51	5.0267	1.11189
hexyl_10mms_0g_run1	2	52	5.03117	1.07527
hexyl_10mms_0g_run1	2	53	5.0323	1.1221
hexyl_10mms_0g_run1	2	54	5.03343	1.03289
hexyl_10mms_0g_run1	2	55	5.03457	1.12435
hexyl_10mms_0g_run1	2	56	5.0357	1.08848
hexyl_10mms_0g_run1	2	57	5.04017	1.11232
hexyl_10mms_0g_run1	2	58	5.0413	1.01436
hexyl_10mms_0g_run1	2	59	5.04243	1.00566
hexyl_10mms_0g_run1	2	60	5.04357	1.09935
hexyl_10mms_0g_run1	2	61	5.0447	1.00507
hexyl_10mms_0g_run1	2	62	5.04917	1.00427
hexyl_10mms_0g_run1	2	63	5.05031	1.10489
hexyl_10mms_0g_run1	2	64	5.05144	1.09006
hexyl_10mms_0g_run1	2	65	5.05257	1.01593
hexyl_10mms_0g_run1	2	66	5.05371	1.06857
hexyl_10mms_0g_run1	2	67	5.05817	0.982974
hexyl_10mms_0g_run1	2	68	5.05931	1.06375
hexyl_10mms_0g_run1	2	69	5.06044	0.997236
hexyl_10mms_0g_run1	2	70	5.06157	1.03622
hexyl_10mms_0g_run1	2	71	5.06271	1.07874
hexyl_10mms_0g_run1	2	72	5.06717	1.08201
hexyl_10mms_0g_run1	2	73	5.0683	1.08395
hexyl_10mms_0g_run1	2	74	5.06944	0.985344
hexyl_10mms_0g_run1	2	75	5.07057	1.10832
hexyl_10mms_0g_run1	2	76	5.07171	0.952645
hexyl_10mms_0g_run1	2	77	5.07618	1.02137
hexyl_10mms_0g_run1	2	78	5.07731	0.979623
hexyl_10mms_0g_run1	2	79	5.07844	1.09085
hexyl_10mms_0g_run1	2	80	5.07957	0.996982
hexyl_10mms_0g_run1	2	81	5.0807	1.00397
hexyl_10mms_0g_run1	2	82	5.08517	0.96234
hexyl_10mms_0g_run1	2	83	5.08631	1.08802
hexyl_10mms_0g_run1	2	84	5.08744	1.00991
hexyl_10mms_0g_run1	2	85	5.08857	0.968003
hexyl_10mms_0g_run1	2	86	5.08971	1.09566
hexyl_10mms_0g_run1	2	87	5.09417	1.03005
hexyl_10mms_0g_run1	2	88	5.0953	1.04876
hexyl_10mms_0g_run1	2	89	5.09644	0.958853
hexyl_10mms_0g_run1	2	90	5.09758	1.10438
hexyl_10mms_0g_run1	2	91	5.09871	0.994236
hexyl_10mms_0g_run1	2	92	5.10317	1.06898
hexyl_10mms_0g_run1	2	93	5.10431	0.964476
hexyl_10mms_0g_run1	2	94	5.10544	1.06865
hexyl_10mms_0g_run1	2	95	5.10658	0.992453
hexyl_10mms_0g_run1	2	96	5.10771	0.998233
hexyl_10mms_0g_run1	2	97	5.11214	0.936029
hexyl_10mms_0g_run1	2	98	5.11324	1.10397
hexyl_10mms_0g_run1	2	99	5.11435	0.968434
hexyl_10mms_0g_run1	2	100	5.11545	0.984871
hexyl_10mms_0g_run1	2	101	5.11655	1.04551
hexyl_10mms_0g_run1	2	102	5.12116	0.984695
hexyl_10mms_0g_run1	2	103	5.12229	0.974879
hexyl_10mms_0g_run1	2	104	5.12342	1.03977
hexyl_10mms_0g_run1	2	105	5.12455	1.04008
hexyl_10mms_0g_run1	2	106	5.12569	0.912734
hexyl_10mms_0g_run1	2	107	5.13018	1.0371
hexyl_10mms_0g_run1	2	108	5.13131	1.01614
hexyl_10mms_0g_run1	2	109	5.13244	0.943023
hexyl_10mms_0g_run1	2	110	5.13358	1.09651
hexyl_10mms_0g_run1	2	111	5.13471	0.950174
hexyl_10mms_0g_run1	2	112	5.13917	1.05695
hexyl_10mms_0g_run1	2	113	5.14031	0.924626
hexyl_10mms_0g_run1	2	114	5.14144	1.08046
hexyl_10mms_0g_run1	2	115	5.14257	0.968081
hexyl_10mms_0g_run1	2	116	5.14371	0.97004
hexyl_10mms_0g_run1	2	117	5.14817	0.935186
hexyl_10mms_0g_run1	2	118	5.1493	1.02707
hexyl_10mms_0g_run1	2	119	5.15044	1.04598
hexyl_10mms_0g_run1	2	120	5.15157	0.982873
hexyl_10mms_0g_run1	2	121	5.1527	1.03949
hexyl_10mms_0g_run1	2	122	5.15718	1.05436
hexyl_10mms_0g_run1	2	123	5.15831	0.990416
hexyl_10mms_0g_run1	2	124	5.15945	0.930798
hexyl_10mms_0g_run1	2	125	5.16058	1.09255
hexyl_10mms_0g_run1	2	126	5.16171	0.946079
hexyl_10mms_0g_run1	2	127	5.16618	1.05548
hexyl_10mms_0g_run1	2	128	5.16731	0.993766
hexyl_10mms_0g_run1	2	129	5.16844	1.05409
hexyl_10mms_0g_run1	2	130	5.16958	0.990847
hexyl_10mms_0g_run1	2	131	5.17071	0.972783
hexyl_10mms_0g_run1	2	132	5.17518	0.972842
hexyl_10mms_0g_run1	2	133	5.17631	0.975154
hexyl_10mms_0g_run1	2	134	5.17744	1.07145
hexyl_10mms_0g_run1	2	135	5.17858	0.945237
hexyl_10mms_0g_run1	2	136	5.17971	0.98683
hexyl_10mms_0g_run1	2	137	5.18418	0.966592
hexyl_10mms_0g_run1	2	138	5.18531	1.07419
hexyl_10mms_0g_run1	2	139	5.18644	0.977838
hexyl_10mms_0g_run1	2	140	5.18758	0.999879
hexyl_10mms_0g_run1	2	141	5.18871	1.06569
hexyl_10mms_0g_run1	2	142	5.19318	1.02645
hexyl_10mms_0g_run1	2	143	5.19431	0.969198
hexyl_10mms_0g_run1	2	144	5.19545	1.0018
hexyl_10mms_0g_run1	2	145	5.19658	1.03019
hexyl_10mms_0g_run1	2	146	5.19771	0.927761
hexyl_10mms_0g_run1	2	147	5.20218	1.05201
hexyl_10mms_0g_run1	2	148	5.20331	0.921413
hexyl_10mms_0g_run1	2	149	5.20444	1.07292
hexyl_10mms_0g_run1	2	150	5.20558	0.944923
hexyl_10mms_0g_run1	2	151	5.20671	0.977779
hexyl_10mms_0g_run1	2	152	5.21118	0.909462
hexyl_10mms_0g_run1	2	153	5.21231	1.00292
hexyl_10mms_0g_run1	2	154	5.21344	1.02605
hexyl_10mms_0g_run1	2	155	5.21457	0.948136
hexyl_10mms_0g_run1	2	156	5.21571	1.03336
hexyl_10mms_0g_run1	2	157	5.22018	1.05434
hexyl_10mms_0g_run1	2	158	5.22131	1.0141
hexyl_10mms_0g_run1	2	159	5.22245	0.931895
hexyl_10mms_0g_run1	2	160	5.22358	1.07092
hexyl_10mms_0g_run1	2	161	5.22471	0.940788
hexyl_10mms_0g_run1	2	162	5.22918	1.03859
hexyl_10mms_0g_run1	2	163	5.23032	0.920177
hexyl_10mms_0g_run1	2	164	5.23145	1.04888
hexyl_10mms_0g_run1	2	165	5.23258	0.947038
hexyl_10mms_0g_run1	2	166	5.23372	1.00483
hexyl_10mms_0g_run1	2	167	5.23818	0.938437
hexyl_10mms_0g_run1	2	168	5.23932	1.02368
hexyl_10mms_0g_run1	2	169	5.24045	0.983812
hexyl_10mms_0g_run1	2	170	5.24159	0.992021
hexyl_10mms_0g_run1	2	171	5.24272	1.01943
hexyl_10mms_0g_run1	2	172	5.24718	0.959537
hexyl_10mms_0g_run1	2	173	5.24831	1.05509
hexyl_10mms_0g_run1	2	174	5.24944	0.996096
hexyl_10mms_0g_run1	2	175	5.25057	0.979737
hexyl_10mms_0g_run1	2	176	5.25171	1.07889
hexyl_10mms_0g_run1	2	177	5.25615	1.03518
hexyl_10mms_0g_run1	2	178	5.25725	0.964768
hexyl_10mms_0g_run1	2	179	5.25835	1.03414
hexyl_10mms_0g_run1	2	180	5.25945	0.935341
hexyl_10mms_0g_run1	2	181	5.26055	1.01249
hexyl_10mms_0g_run1	2	182	5.26517	1.02772
hexyl_10mms_0g_run1	2	183	5.2663	0.993353
hexyl_10mms_0g_run1	2	184	5.26744	0.997585
hexyl_10mms_0g_run1	2	185	5.26857	1.03704
hexyl_10mms_0g_run1	2	186	5.26971	0.961751
hexyl_10mms_0g_run1	2	187	5.27418	0.906678
hexyl_10mms_0g_run1	2	188	5.27532	1.05981
hexyl_10mms_0g_run1	2	189	5.27645	0.966159
hexyl_10mms_0g_run1	2	190	5.27758	0.952582
hexyl_10mms_0g_run1	2	191	5.27871	1.03567
hexyl_10mms_0g_run1	2	192	5.28318	1.03346
hexyl_10mms_0g_run1	2	193	5.28432	1.01306
hexyl_10mms_0g_run1	2	194	5.28545	0.965493
hexyl_10mms_0g_run1	2	195	5.28659	1.06741
hexyl_10mms_0g_run1	2	196	5.28772	0.926466
hexyl_10mms_0g_run1	2	197	5.29218	1.01087
hexyl_10mms_0g_run1	2	198	5.29331	0.950682
hexyl_10mms_0g_run1	2	199	5.29444	0.942943
hexyl_10mms_0g_run1	2	200	5.29558	1.02685
hexyl_10mms_0g_run1	2	201	5.29671	0.94263
hexyl_10mms_0g_run1	2	202	5.30119	0.935518
hexyl_10mms_0g_run1	2	203	5.30232	1.02317
hexyl_10mms_0g_run1	2	204	5.30345	0.96614
hexyl_10mms_0g_run1	2	205	5.30459	0.971723
hexyl_10mms_0g_run1	2	206	5.30572	1.03154
hexyl_10mms_0g_run1	2	207	5.31018	0.927348
hexyl_10mms_0g_run1	2	208	5.31132	1.03267
hexyl_10mms_0g_run1	2	209	5.31245	0.946665
hexyl_10mms_0g_run1	2	210	5.31358	0.998035
hexyl_10mms_0g_run1	2	211	5.31472	0.997428
hexyl_10mms_0g_run1	2	212	5.31918	1.02919
hexyl_10mms_0g_run1	2	213	5.32031	1.00295
hexyl_10mms_0g_run1	2	214	5.32145	0.930757
hexyl_10mms_0g_run1	2	215	5.32258	1.06518
hexyl_10mms_0g_run1	2	216	5.32371	0.933323
hexyl_10mms_0g_run1	2	217	5.32818	1.01463
hexyl_10mms_0g_run1	2	218	5.32931	0.912478
hexyl_10mms_0g_run1	2	219	5.33045	1.06586
hexyl_10mms_0g_run1	2	220	5.33158	0.941023
hexyl_10mms_0g_run1	2	221	5.33271	0.980599
hexyl_10mms_0g_run1	2	222	5.33719	0.91428
hexyl_10mms_0g_run1	2	223	5.33832	1.04517
hexyl_10mms_0g_run1	2	224	5.33945	0.931364
hexyl_10mms_0g_run1	2	225	5.34059	0.991688
hexyl_10mms_0g_run1	2	226	5.34172	1.03134
hexyl_10mms_0g_run1	2	227	5.34618	1.02754
hexyl_10mms_0g_run1	2	228	5.34732	0.988141
hexyl_10mms_0g_run1	2	229	5.34845	0.946979
hexyl_10mms_0g_run1	2	230	5.34959	1.05824
hexyl_10mms_0g_run1	2	231	5.35072	0.924448
hexyl_10mms_0g_run1	2	232	5.35518	1.02292
hexyl_10mms_0g_run1	2	233	5.35632	0.934734
hexyl_10mms_0g_run1	2	234	5.35745	0.987515
hexyl_10mms_0g_run1	2	235	5.35858	0.987573
hexyl_10mms_0g_run1	2	236	5.35972	0.921
hexyl_10mms_0g_run1	2	237	5.36419	0.916553
hexyl_10mms_0g_run1	2	238	5.36532	1.02905
hexyl_10mms_0g_run1	2	239	5.36645	1.02051
hexyl_10mms_0g_run1	2	240	5.36758	0.947292
hexyl_10mms_0g_run1	2	241	5.36872	1.03154
hexyl_10mms_0g_run1	2	242	5.37319	0.953916
hexyl_10mms_0g_run1	2	243	5.37432	0.967767
hexyl_10mms_0g_run1	2	244	5.37546	0.906347
hexyl_10mms_0g_run1	2	245	5.37659	0.95709
hexyl_10mms_0g_run1	2	246	5.37773	0.856231
hexyl_10mms_0g_run1	2	247	5.38219	0.871336
hexyl_10mms_0g_run1	2	248	5.38332	0.784485
hexyl_10mms_0g_run1	2	249	5.38445	0.791401
hexyl_10mms_0g_run1	2	250	5.38559	0.850235
hexyl_10mms_0g_run1	2	251	5.38672	0.713641
hexyl_10mms_0g_run1	2	252	5.39119	0.817517
hexyl_10mms_0g_run1	2	253	5.39232	0.711838
hexyl_10mms_0g_run1	2	254	5.39346	0.864773
hexyl_10mms_0g_run1	2	255	5.39459	0.724279
hexyl_10mms_0g_run1	2	256	5.39572	0.851352
hexyl_10mms_0g_run1	2	257	5.40015	0.749925
hexyl_10mms_0g_run1	2	258	5.40126	0.79289
hexyl_10mms_0g_run1	2	259	5.40236	0.830487
hexyl_10mms_0g_run1	2	260	5.40346	0.700181
hexyl_10mms_0g_run1	2	261	5.40456	0.814206
hexyl_10mms_0g_run1	2	262	5.40917	0.673203
hexyl_10mms_0g_run1	2	263	5.41031	0.804841
hexyl_10mms_0g_run1	2	264	5.41144	0.751394
hexyl_10mms_0g_run1	2	265	5.41258	0.72906
hexyl_10mms_0g_run1	2	266	5.41371	0.826294
hexyl_10mms_0g_run1	2	267	5.41819	0.799923
hexyl_10mms_0g_run1	2	268	5.41932	0.712935
hexyl_10mms_0g_run1	3	1	6.68278	0.570952
hexyl_10mms_0g_run1	3	2	6.68724	0.5562
hexyl_10mms_0g_run1	3	3	6.68838	0.555612
hexyl_10mms_0g_run1	3	4	6.68951	0.500128
hexyl_10mms_0g_run1	3	5	6.69065	0.577378
hexyl_10mms_0g_run1	3	6	6.69178	0.518348
hexyl_10mms_0g_run1	3	7	6.69621	0.533689
hexyl_10mms_0g_run1	3	8	6.69732	0.590329
hexyl_10mms_0g_run1	3	9	6.69842	0.504693
hexyl_10mms_0g_run1	3	10	6.69952	0.589741
hexyl_10mms_0g_run1	3	11	6.70062	0.48177
hexyl_10mms_0g_run1	3	12	6.70523	0.582081
hexyl_10mms_0g_run1	3	13	6.70637	0.481555
hexyl_10mms_0g_run1	3	14	6.7075	0.589251
hexyl_10mms_0g_run1	3	15	6.70863	0.540644
hexyl_10mms_0g_run1	3	16	6.70977	0.486786
hexyl_10mms_0g_run1	3	17	6.71425	0.505496
hexyl_10mms_0g_run1	3	18	6.71538	0.613388
hexyl_10mms_0g_run1	3	19	6.71652	0.479517
hexyl_10mms_0g_run1	3	20	6.71765	0.616954
hexyl_10mms_0g_run1	3	21	6.71878	0.562234
hexyl_10mms_0g_run1	3	22	6.72325	0.623909
hexyl_10mms_0g_run1	3	23	6.72438	0.541858
hexyl_10mms_0g_run1	3	24	6.72551	0.546521
hexyl_10mms_0g_run1	3	25	6.72665	0.628631
hexyl_10mms_0g_run1	3	26	6.72778	0.542622
hexyl_10mms_0g_run1	3	27	6.73224	0.756252
hexyl_10mms_0g_run1	3	28	6.73338	0.725062
hexyl_10mms_0g_run1	3	29	6.73451	0.86199
hexyl_10mms_0g_run1	3	30	6.73564	0.856994
hexyl_10mms_0g_run1	3	31	6.73678	0.837049
hexyl_10mms_0g_run1	3	32	6.74125	0.874626
hexyl_10mms_0g_run1	3	33	6.74239	1.01467
hexyl_10mms_0g_run1	3	34	6.74352	0.866104
hexyl_10mms_0g_run1	3	35	6.74465	0.991041
hexyl_10mms_0g_run1	3	36	6.74578	1.00722
hexyl_10mms_0g_run1	3	37	6.75025	1.08965
hexyl_10mms_0g_run1	3	38	6.75138	1.12844
hexyl_10mms_0g_run1	3	39	6.75251	1.04841
hexyl_10mms_0g_run1	3	40	6.75365	1.1219
hexyl_10mms_0g_run1	3	41	6.75478	1.08657
hexyl_10mms_0g_run1	3	42	6.75925	1.08301
hexyl_10mms_0g_run1	3	43	6.76038	1.04004
hexyl_10mms_0g_run1	3	44	6.76151	1.09072
hexyl_10mms_0g_run1	3	45	6.76265	1.13904
hexyl_10mms_0g_run1	3	46	6.76378	1.02997
hexyl_10mms_0g_run1	3	47	6.76825	1.10097
hexyl_10mms_0g_run1	3	48	6.76938	1.04108
hexyl_10mms_0g_run1	3	49	6.77051	1.18978
hexyl_10mms_0g_run1	3	50	6.77164	1.04296
hexyl_10mms_0g_run1	3	51	6.77278	1.11306
hexyl_10mms_0g_run1	3	52	6.77725	1.05464
hexyl_10mms_0g_run1	3	53	6.77838	1.13972
hexyl_10mms_0g_run1	3	54	6.77952	1.00928
hexyl_10mms_0g_run1	3	55	6.78066	1.12985
hexyl_10mms_0g_run1	3	56	6.78179	1.06461
hexyl_10mms_0g_run1	3	57	6.78625	1.13698
hexyl_10mms_0g_run1	3	58	6.78738	1.01077
hexyl_10mms_0g_run1	3	59	6.78851	1.03189
hexyl_10mms_0g_run1	3	60	6.78965	1.09962
hexyl_10mms_0g_run1	3	61	6.79078	1.02121
hexyl_10mms_0g_run1	3	62	6.79525	1.03385
hexyl_10mms_0g_run1	3	63	6.79638	1.00525
hexyl_10mms_0g_run1	3	64	6.79751	1.08941
hexyl_10mms_0g_run1	3	65	6.79864	1.04862
hexyl_10mms_0g_run1	3	66	6.79978	1.01259
hexyl_10mms_0g_run1	3	67	6.80425	0.981148
hexyl_10mms_0g_run1	3	68	6.80539	1.0947
hexyl_10mms_0g_run1	3	69	6.80652	1.00305
hexyl_10mms_0g_run1	3	70	6.80765	1.0255
hexyl_10mms_0g_run1	3	71	6.80878	1.06841
hexyl_10mms_0g_run1	3	72	6.81325	1.08142
hexyl_10mms_0g_run1	3	73	6.81439	1.00965
hexyl_10mms_0g_run1	3	74	6.81552	0.981051
hexyl_10mms_0g_run1	3	75	6.81665	1.06077
hexyl_10mms_0g_run1	3	76	6.81778	1.06359
hexyl_10mms_0g_run1	3	77	6.82225	1.03771
hexyl_10mms_0g_run1	3	78	6.82339	0.982677
hexyl_10mms_0g_run1	3	79	6.82452	1.05959
hexyl_10mms_0g_run1	3	80	6.82565	1.01389
hexyl_10mms_0g_run1	3	81	6.82679	0.963261
hexyl_10mms_0g_run1	3	82	6.83125	0.983166
hexyl_10mms_0g_run1	3	83	6.83239	1.03236
hexyl_10mms_0g_run1	3	84	6.83352	1.04627
hexyl_10mms_0g_run1	3	85	6.83465	0.965553
hexyl_10mms_0g_run1	3	86	6.83579	1.09952
hexyl_10mms_0g_run1	3	87	6.84022	1.04312
hexyl_10mms_0g_run1	3	88	6.84132	0.931326
hexyl_10mms_0g_run1	3	89	6.84243	1.08726
hexyl_10mms_0g_run1	3	90	6.84353	0.938889
hexyl_10mms_0g_run1	3	91	6.84463	0.985322
hexyl_10mms_0g_run1	3	92	6.84924	0.965122
hexyl_10mms_0g_run1	3	93	6.85037	1.08032
hexyl_10mms_0g_run1	3	94	6.8515	1.0047
hexyl_10mms_0g_run1	3	95	6.85263	0.970726
hexyl_10mms_0g_run1	3	96	6.85377	1.06919
hexyl_10mms_0g_run1	3	97	6.85825	0.972097
hexyl_10mms_0g_run1	3	98	6.85939	0.954288
hexyl_10mms_0g_run1	3	99	6.86052	1.05472
hexyl_10mms_0g_run1	3	100	6.86165	0.952583
hexyl_10mms_0g_run1	3	101	6.86279	1.02264
hexyl_10mms_0g_run1	3	102	6.86725	0.95178
hexyl_10mms_0g_run1	3	103	6.86839	1.09521
hexyl_10mms_0g_run1	3	104	6.86952	0.969119
hexyl_10mms_0g_run1	3	105	6.87066	1.02014
hexyl_10mms_0g_run1	3	106	6.87179	1.03736
hexyl_10mms_0g_run1	3	107	6.87625	0.998154
hexyl_10mms_0g_run1	3	108	6.87739	0.995607
hexyl_10mms_0g_run1	3	109	6.87852	0.949331
hexyl_10mms_0g_run1	3	110	6.87965	1.03469
hexyl_10mms_0g_run1	3	111	6.88078	1.0363
hexyl_10mms_0g_run1	3	112	6.88526	0.98348
hexyl_10mms_0g_run1	3	113	6.88639	0.998331
hexyl_10mms_0g_run1	3	114	6.88753	1.0428
hexyl_10mms_0g_run1	3	115	6.88866	0.92443
hexyl_10mms_0g_run1	3	116	6.8898	1.03759
hexyl_10mms_0g_run1	3	117	6.89426	0.954582
hexyl_10mms_0g_run1	3	118	6.89539	0.984381
hexyl_10mms_0g_run1	3	119	6.89652	1.0767
hexyl_10mms_0g_run1	3	120	6.89765	0.910481
hexyl_10mms_0g_run1	3	121	6.89878	1.05331
hexyl_10mms_0g_run1	3	122	6.90326	0.980972
hexyl_10mms_0g_run1	3	123	6.90439	1.07288
hexyl_10mms_0g_run1	3	124	6.90552	0.91387
hexyl_10mms_0g_run1	3	125	6.90666	1.05583
hexyl_10mms_0g_run1	3	126	6.90779	0.976701
hexyl_10mms_0g_run1	3	127	6.91225	1.07881
hexyl_10mms_0g_run1	3	128	6.91339	0.923333
hexyl_10mms_0g_run1	3	129	6.91452	1.0249
hexyl_10mms_0g_run1	3	130	6.91566	1.02844
hexyl_10mms_0g_run1	3	131	6.91679	0.926115
hexyl_10mms_0g_run1	3	132	6.92126	0.932659
hexyl_10mms_0g_run1	3	133	6.92239	0.994412
hexyl_10mms_0g_run1	3	134	6.92352	1.05023
hexyl_10mms_0g_run1	3	135	6.92466	0.923568
hexyl_10mms_0g_run1	3	136	6.92579	1.04421
hexyl_10mms_0g_run1	3	137	6.93026	0.945648
hexyl_10mms_0g_run1	3	138	6.93139	1.0487
hexyl_10mms_0g_run1	3	139	6.93253	0.930954
hexyl_10mms_0g_run1	3	140	6.93366	1.01677
hexyl_10mms_0g_run1	3	141	6.93479	1.03156
hexyl_10mms_0g_run1	3	142	6.93926	1.02133
hexyl_10mms_0g_run1	3	143	6.94039	1.0095
hexyl_10mms_0g_run1	3	144	6.94152	0.915927
hexyl_10mms_0g_run1	3	145	6.94265	0.992042
hexyl_10mms_0g_run1	3	146	6.94379	0.973704
hexyl_10mms_0g_run1	3	147	6.94826	0.974193
hexyl_10mms_0g_run1	3	148	6.94939	0.947686
hexyl_10mms_0g_run1	3	149	6.95053	1.03554
hexyl_10mms_0g_run1	3	150	6.95166	0.989044
hexyl_10mms_0g_run1	3	151	6.9528	0.990791
hexyl_10mms_0g_run1	3	152	6.95726	0.940596
hexyl_10mms_0g_run1	3	153	6.95839	0.991359
hexyl_10mms_0g_run1	3	154	6.95952	1.01175
hexyl_10mms_0g_run1	3	155	6.96066	0.902529
hexyl_10mms_0g_run1	3	156	6.96179	1.04804
hexyl_10mms_0g_run1	3	157	6.96626	0.973667
hexyl_10mms_0g_run1	3	158	6.9674	1.01749
hexyl_10mms_0g_run1	3	159	6.96853	0.957465
hexyl_10mms_0g_run1	3	160	6.96966	1.03997
hexyl_10mms_0g_run1	3	161	6.9708	0.960521
hexyl_10mms_0g_run1	3	162	6.97526	1.06587
hexyl_10mms_0g_run1	3	163	6.97639	0.915283
hexyl_10mms_0g_run1	3	164	6.97752	0.967692
hexyl_10mms_0g_run1	3	165	6.97866	1.02631
hexyl_10mms_0g_run1	3	166	6.97979	0.933994
hexyl_10mms_0g_run1	3	167	6.98423	0.937363
hexyl_10mms_0g_run1	3	168	6.98533	1.04104
hexyl_10mms_0g_run1	3	169	6.98643	0.966673
hexyl_10mms_0g_run1	3	170	6.98753	1.02707
hexyl_10mms_0g_run1	3	171	6.98863	0.959914
hexyl_10mms_0g_run1	3	172	6.99325	0.966046
hexyl_10mms_0g_run1	3	173	6.99438	0.9404
hexyl_10mms_0g_run1	3	174	6.99551	1.06042
hexyl_10mms_0g_run1	3	175	6.99664	0.928253
hexyl_10mms_0g_run1	3	176	6.99778	1.01124
hexyl_10mms_0g_run1	3	177	7.00226	1.06185
hexyl_10mms_0g_run1	3	178	7.00339	0.964263
hexyl_10mms_0g_run1	3	179	7.00453	1.00978
hexyl_10mms_0g_run1	3	180	7.00566	1.01175
hexyl_10mms_0g_run1	3	181	7.0068	0.941987
hexyl_10mms_0g_run1	3	182	7.01126	1.00112
hexyl_10mms_0g_run1	3	183	7.01239	0.94185
hexyl_10mms_0g_run1	3	184	7.01353	1.01867
hexyl_10mms_0g_run1	3	185	7.01466	0.952194
hexyl_10mms_0g_run1	3	186	7.0158	0.999627
hexyl_10mms_0g_run1	3	187	7.02026	0.955016
hexyl_10mms_0g_run1	3	188	7.02139	0.973315
hexyl_10mms_0g_run1	3	189	7.02253	1.0363
hexyl_10mms_0g_run1	3	190	7.02366	0.905174
hexyl_10mms_0g_run1	3	191	7.02479	1.05076
hexyl_10mms_0g_run1	3	192	7.02927	1.00023
hexyl_10mms_0g_run1	3	193	7.0304	1.02051
hexyl_10mms_0g_run1	3	194	7.03153	0.90968
hexyl_10mms_0g_run1	3	195	7.03267	1.04357
hexyl_10mms_0g_run1	3	196	7.0338	0.938069
hexyl_10mms_0g_run1	3	197	7.03826	1.06385
hexyl_10mms_0g_run1	3	198	7.0394	0.907329
hexyl_10mms_0g_run1	3	199	7.04053	1.03695
hexyl_10mms_0g_run1	3	200	7.04166	0.979604
hexyl_10mms_0g_run1	3	201	7.0428	0.897082
hexyl_10mms_0g_run1	3	202	7.04726	0.929624
hexyl_10mms_0g_run1	3	203	7.04839	0.974901
hexyl_10mms_0g_run1	3	204	7.04952	1.0257
hexyl_10mms_0g_run1	3	205	7.05066	0.971747
hexyl_10mms_0g_run1	3	206	7.05179	0.977194
hexyl_10mms_0g_run1	3	207	7.05626	0.947238
hexyl_10mms_0g_run1	3	208	7.0574	1.03873
hexyl_10mms_0g_run1	3	209	7.05853	0.907192
hexyl_10mms_0g_run1	3	210	7.05967	1.02856
hexyl_10mms_0g_run1	3	211	7.0608	0.929879
hexyl_10mms_0g_run1	3	212	7.06527	1.05662
hexyl_10mms_0g_run1	3	213	7.0664	0.929487
hexyl_10mms_0g_run1	3	214	7.06753	0.975274
hexyl_10mms_0g_run1	3	215	7.06866	1.0469
hexyl_10mms_0g_run1	3	216	7.0698	0.958111
hexyl_10mms_0g_run1	3	217	7.07426	0.998314
hexyl_10mms_0g_run1	3	218	7.0754	0.938343
hexyl_10mms_0g_run1	3	219	7.07653	1.00123
hexyl_10mms_0g_run1	3	220	7.07767	0.940283
hexyl_10mms_0g_run1	3	221	7.0788	0.940949
hexyl_10mms_0g_run1	3	222	7.08326	0.935228
hexyl_10mms_0g_run1	3	223	7.08439	1.01869
hexyl_10mms_0g_run1	3	224	7.08553	1.03305
hexyl_10mms_0g_run1	3	225	7.08666	0.921063
hexyl_10mms_0g_run1	3	226	7.0878	1.0654
hexyl_10mms_0g_run1	3	227	7.09227	1.00482
hexyl_10mms_0g_run1	3	228	7.0934	0.993788
hexyl_10mms_0g_run1	3	229	7.09453	0.93366
hexyl_10mms_0g_run1	3	230	7.09567	1.01834
hexyl_10mms_0g_run1	3	231	7.09681	0.92986
hexyl_10mms_0g_run1	3	232	7.10127	1.05797
hexyl_10mms_0g_run1	3	233	7.1024	0.915264
hexyl_10mms_0g_run1	3	234	7.10353	1.0386
hexyl_10mms_0g_run1	3	235	7.10467	0.959072
hexyl_10mms_0g_run1	3	236	7.10581	0.961129
hexyl_10mms_0g_run1	3	237	7.11027	0.888678
hexyl_10mms_0g_run1	3	238	7.1114	1.00039
hexyl_10mms_0g_run1	3	239	7.11253	1.00594
hexyl_10mms_0g_run1	3	240	7.11367	0.902079
hexyl_10mms_0g_run1	3	241	7.1148	1.04829
hexyl_10mms_0g_run1	3	242	7.11926	0.957563
hexyl_10mms_0g_run1	3	243	7.1204	1.04512
hexyl_10mms_0g_run1	3	244	7.12153	0.932779
hexyl_10mms_0g_run1	3	245	7.12266	0.989106
hexyl_10mms_0g_run1	3	246	7.1238	1.0144
hexyl_10mms_0g_run1	3	247	7.12823	0.958993
hexyl_10mms_0g_run1	3	248	7.12933	0.800416
hexyl_10mms_0g_run1	3	249	7.13043	0.934856
hexyl_10mms_0g_run1	3	250	7.13153	0.784449
hexyl_10mms_0g_run1	3	251	7.13264	0.772811
hexyl_10mms_0g_run1	3	252	7.13725	0.859349
hexyl_10mms_0g_run1	3	253	7.13839	0.718698
hexyl_10mms_0g_run1	3	254	7.13953	0.815208
hexyl_10mms_0g_run1	3	255	7.14066	0.806294
hexyl_10mms_0g_run1	3	256	7.1418	0.726613
hexyl_10mms_0g_run1	3	257	7.14627	0.751044
hexyl_10mms_0g_run1	3	258	7.1474	0.821634
hexyl_10mms_0g_run1	3	259	7.14853	0.793559
hexyl_10mms_0g_run1	3	260	7.14967	0.785448
hexyl_10mms_0g_run1	3	261	7.1508	0.83574
hexyl_10mms_0g_run1	3	262	7.15527	0.741679
hexyl_10mms_0g_run1	3	263	7.1564	0.803472
hexyl_10mms_0g_run1	3	264	7.15754	0.692268
hexyl_10mms_0g_run1	3	265	7.15867	0.813837
hexyl_10mms_0g_run1	3	266	7.15981	0.693444
hexyl_10mms_0g_run1	3	267	7.16427	0.844243
hexyl_10mms_0g_run1	3	268	7.1654	0.678711
hexyl_10mms_0g_run2	1	1	3.43745	0.309248
hexyl_10mms_0g_run2	1	2	3.43858	0.206899
hexyl_10mms_0g_run2	1	3	3.43971	0.349588
hexyl_10mms_0g_run2	1	4	3.44085	0.238148
hexyl_10mms_0g_run2	1	5	3.44198	0.241929
hexyl_10mms_0g_run2	1	6	3.44645	0.200472
hexyl_10mms_0g_run2	1	7	3.44758	0.354368
hexyl_10mms_0g_run2	1	8	3.44872	0.272669
hexyl_10mms_0g_run2	1	9	3.44985	0.265459
hexyl_10mms_0g_run2	1	10	3.45098	0.344122
hexyl_10mms_0g_run2	1	11	3.45545	0.295866
hexyl_10mms_0g_run2	1	12	3.45658	0.301254
hexyl_10mms_0g_run2	1	13	3.45772	0.21358
hexyl_10mms_0g_run2	1	14	3.45885	0.336696
hexyl_10mms_0g_run2	1	15	3.45998	0.296807
hexyl_10mms_0g_run2	1	16	3.46445	0.309267
hexyl_10mms_0g_run2	1	17	3.46559	0.253841
hexyl_10mms_0g_run2	1	18	3.46672	0.348334
hexyl_10mms_0g_run2	1	19	3.46785	0.295337
hexyl_10mms_0g_run2	1	20	3.46899	0.250805
hexyl_10mms_0g_run2	1	21	3.47345	0.259641
hexyl_10mms_0g_run2	1	22	3.47458	0.237129
hexyl_10mms_0g_run2	1	23	3.47571	0.369258
hexyl_10mms_0g_run2	1	24	3.47685	0.226648
hexyl_10mms_0g_run2	1	25	3.47798	0.296474
hexyl_10mms_0g_run2	1	26	3.48245	0.248258
hexyl_10mms_0g_run2	1	27	3.48358	0.359893
hexyl_10mms_0g_run2	1	28	3.48472	0.261854
hexyl_10mms_0g_run2	1	29	3.48585	0.274021
hexyl_10mms_0g_run2	1	30	3.48698	0.344611
hexyl_10mms_0g_run2	1	31	3.49145	0.311658
hexyl_10mms_0g_run2	1	32	3.49259	0.262815
hexyl_10mms_0g_run2	1	33	3.49372	0.220025
hexyl_10mms_0g_run2	1	34	3.49485	0.364517
hexyl_10mms_0g_run2	1	35	3.49598	0.204861
hexyl_10mms_0g_run2	1	36	3.50045	0.327116
hexyl_10mms_0g_run2	1	37	3.50159	0.285659
hexyl_10mms_0g_run2	1	38	3.50272	0.380602
hexyl_10mms_0g_run2	1	39	3.50386	0.275628
hexyl_10mms_0g_run2	1	40	3.50499	0.425703
hexyl_10mms_0g_run2	1	41	3.50945	0.372315
hexyl_10mms_0g_run2	1	42	3.51059	0.571919
hexyl_10mms_0g_run2	1	43	3.51172	0.450076
hexyl_10mms_0g_run2	1	44	3.51286	0.548369
hexyl_10mms_0g_run2	1	45	3.51399	0.575583
hexyl_10mms_0g_run2	1	46	3.51845	0.612984
hexyl_10mms_0g_run2	1	47	3.51959	0.613043
hexyl_10mms_0g_run2	1	48	3.52072	0.565845
hexyl_10mms_0g_run2	1	49	3.52186	0.691489
hexyl_10mms_0g_run2	1	50	3.52299	0.583086
hexyl_10mms_0g_run2	1	51	3.52746	0.725305
hexyl_10mms_0g_run2	1	52	3.52859	0.654343
hexyl_10mms_0g_run2	1	53	3.52972	0.758925
hexyl_10mms_0g_run2	1	54	3.53086	0.675502
hexyl_10mms_0g_run2	1	55	3.53199	0.732476
hexyl_10mms_0g_run2	1	56	3.53645	0.590962
hexyl_10mms_0g_run2	1	57	3.53759	0.653285
hexyl_10mms_0g_run2	1	58	3.53872	0.619626
hexyl_10mms_0g_run2	1	59	3.53986	0.602698
hexyl_10mms_0g_run2	1	60	3.54099	0.63334
hexyl_10mms_0g_run2	1	61	3.54546	0.582126
hexyl_10mms_0g_run2	1	62	3.54659	0.606166
hexyl_10mms_0g_run2	1	63	3.54772	0.536536
hexyl_10mms_0g_run2	1	64	3.54886	0.624876
hexyl_10mms_0g_run2	1	65	3.54999	0.557656
hexyl_10mms_0g_run2	1	66	3.55445	0.564866
hexyl_10mms_0g_run2	1	67	3.55559	0.508147
hexyl_10mms_0g_run2	1	68	3.55672	0.441886
hexyl_10mms_0g_run2	1	69	3.55785	0.576307
hexyl_10mms_0g_run2	1	70	3.55899	0.451956
hexyl_10mms_0g_run2	1	71	3.56342	0.482696
hexyl_10mms_0g_run2	1	72	3.56453	0.566844
hexyl_10mms_0g_run2	1	73	3.56563	0.474742
hexyl_10mms_0g_run2	1	74	3.56673	0.572193
hexyl_10mms_0g_run2	1	75	3.56784	0.567138
hexyl_10mms_0g_run2	1	76	3.57244	0.544098
hexyl_10mms_0g_run2	1	77	3.57357	0.431228
hexyl_10mms_0g_run2	1	78	3.57471	0.561065
hexyl_10mms_0g_run2	1	79	3.57584	0.484734
hexyl_10mms_0g_run2	1	80	3.57697	0.471137
hexyl_10mms_0g_run2	1	81	3.58146	0.573682
hexyl_10mms_0g_run2	1	82	3.58259	0.537633
hexyl_10mms_0g_run2	1	83	3.58372	0.501015
hexyl_10mms_0g_run2	1	84	3.58486	0.580069
hexyl_10mms_0g_run2	1	85	3.58599	0.458775
hexyl_10mms_0g_run2	1	86	3.59045	0.524859
hexyl_10mms_0g_run2	1	87	3.59159	0.468708
hexyl_10mms_0g_run2	1	88	3.59272	0.486576
hexyl_10mms_0g_run2	1	89	3.59385	0.554012
hexyl_10mms_0g_run2	1	90	3.59498	0.450487
hexyl_10mms_0g_run2	1	91	3.59945	0.522488
hexyl_10mms_0g_run2	1	92	3.60059	0.495745
hexyl_10mms_0g_run2	1	93	3.60172	0.565297
hexyl_10mms_0g_run2	1	94	3.60286	0.452192
hexyl_10mms_0g_run2	1	95	3.60399	0.556578
hexyl_10mms_0g_run2	1	96	3.60846	0.53295
hexyl_10mms_0g_run2	1	97	3.6096	0.493119
hexyl_10mms_0g_run2	1	98	3.61073	0.501387
hexyl_10mms_0g_run2	1	99	3.61187	0.573271
hexyl_10mms_0g_run2	1	100	3.613	0.438301
hexyl_10mms_0g_run2	1	101	3.61746	0.569764
hexyl_10mms_0g_run2	1	102	3.61859	0.50125
hexyl_10mms_0g_run2	1	103	3.61972	0.467493
hexyl_10mms_0g_run2	1	104	3.62086	0.577209
hexyl_10mms_0g_run2	1	105	3.62199	0.429896
hexyl_10mms_0g_run2	1	106	3.62646	0.52384
hexyl_10mms_0g_run2	1	107	3.62759	0.442239
hexyl_10mms_0g_run2	1	108	3.62872	0.592236
hexyl_10mms_0g_run2	1	109	3.62986	0.431169
hexyl_10mms_0g_run2	1	110	3.63099	0.560203
hexyl_10mms_0g_run2	1	111	3.63546	0.433129
hexyl_10mms_0g_run2	1	112	3.63659	0.580128
hexyl_10mms_0g_run2	1	113	3.63773	0.45033
hexyl_10mms_0g_run2	1	114	3.63886	0.521332
hexyl_10mms_0g_run2	1	115	3.63999	0.547801
hexyl_10mms_0g_run2	1	116	3.64446	0.578737
hexyl_10mms_0g_run2	1	117	3.6456	0.463673
hexyl_10mms_0g_run2	1	118	3.64673	0.490553
hexyl_10mms_0g_run2	1	119	3.64786	0.577738
hexyl_10mms_0g_run2	1	120	3.649	0.448783
hexyl_10mms_0g_run2	1	121	3.65346	0.535223
hexyl_10mms_0g_run2	1	122	3.65459	0.467003
hexyl_10mms_0g_run2	1	123	3.65573	0.552621
hexyl_10mms_0g_run2	1	124	3.65686	0.465906
hexyl_10mms_0g_run2	1	125	3.658	0.487634
hexyl_10mms_0g_run2	1	126	3.66246	0.480561
hexyl_10mms_0g_run2	1	127	3.66359	0.500525
hexyl_10mms_0g_run2	1	128	3.66472	0.564337
hexyl_10mms_0g_run2	1	129	3.66586	0.46138
hexyl_10mms_0g_run2	1	130	3.66699	0.554364
hexyl_10mms_0g_run2	1	131	3.67146	0.549212
hexyl_10mms_0g_run2	1	132	3.6726	0.540924
hexyl_10mms_0g_run2	1	133	3.67373	0.437439
hexyl_10mms_0g_run2	1	134	3.67486	0.527602
hexyl_10mms_0g_run2	1	135	3.676	0.474506
hexyl_10mms_0g_run2	1	136	3.68046	0.559379
hexyl_10mms_0g_run2	1	137	3.68159	0.478973
hexyl_10mms_0g_run2	1	138	3.68273	0.496312
hexyl_10mms_0g_run2	1	139	3.68386	0.573896
hexyl_10mms_0g_run2	1	140	3.68499	0.434852
hexyl_10mms_0g_run2	1	141	3.68946	0.489749
hexyl_10mms_0g_run2	1	142	3.69059	0.435537
hexyl_10mms_0g_run2	1	143	3.69173	0.57468
hexyl_10mms_0g_run2	1	144	3.69286	0.416494
hexyl_10mms_0g_run2	1	145	3.694	0.553286
hexyl_10mms_0g_run2	1	146	3.69846	0.436948
hexyl_10mms_0g_run2	1	147	3.6996	0.615667
hexyl_10mms_0g_run2	1	148	3.70073	0.431286
hexyl_10mms_0g_run2	1	149	3.70186	0.541609
hexyl_10mms_0g_run2	1	150	3.703	0.530108
hexyl_10mms_0g_run2	1	151	3.70743	0.576228
hexyl_10mms_0g_run2	1	152	3.70853	0.429307
hexyl_10mms_0g_run2	1	153	3.70963	0.53432
hexyl_10mms_0g_run2	1	154	3.71073	0.482793
hexyl_10mms_0g_run2	1	155	3.71184	0.520038
hexyl_10mms_0g_run2	1	156	3.71645	0.559202
hexyl_10mms_0g_run2	1	157	3.71758	0.542706
hexyl_10mms_0g_run2	1	158	3.71872	0.44743
hexyl_10mms_0g_run2	1	159	3.71985	0.588845
hexyl_10mms_0g_run2	1	160	3.72098	0.437242
hexyl_10mms_0g_run2	1	161	3.72546	0.461889
hexyl_10mms_0g_run2	1	162	3.7266	0.543333
hexyl_10mms_0g_run2	1	163	3.72773	0.470548
hexyl_10mms_0g_run2	1	164	3.72887	0.509184
hexyl_10mms_0g_run2	1	165	3.73	0.545899
hexyl_10mms_0g_run2	1	166	3.73446	0.494666
hexyl_10mms_0g_run2	1	167	3.73559	0.578011
hexyl_10mms_0g_run2	1	168	3.73673	0.445706
hexyl_10mms_0g_run2	1	169	3.73786	0.53483
hexyl_10mms_0g_run2	1	170	3.739	0.536926
hexyl_10mms_0g_run2	1	171	3.74346	0.574171
hexyl_10mms_0g_run2	1	172	3.74459	0.486085
hexyl_10mms_0g_run2	1	173	3.74573	0.476602
hexyl_10mms_0g_run2	1	174	3.74686	0.57515
hexyl_10mms_0g_run2	1	175	3.74799	0.440063
hexyl_10mms_0g_run2	1	176	3.75247	0.470431
hexyl_10mms_0g_run2	1	177	3.7536	0.49112
hexyl_10mms_0g_run2	1	178	3.75473	0.559986
hexyl_10mms_0g_run2	1	179	3.75587	0.425389
hexyl_10mms_0g_run2	1	180	3.757	0.549426
hexyl_10mms_0g_run2	1	181	3.76146	0.443648
hexyl_10mms_0g_run2	1	182	3.7626	0.583594
hexyl_10mms_0g_run2	1	183	3.76373	0.442688
hexyl_10mms_0g_run2	1	184	3.76487	0.548231
hexyl_10mms_0g_run2	1	185	3.766	0.520939
hexyl_10mms_0g_run2	1	186	3.77046	0.562082
hexyl_10mms_0g_run2	1	187	3.7716	0.477582
hexyl_10mms_0g_run2	1	188	3.77273	0.488436
hexyl_10mms_0g_run2	1	189	3.77387	0.517393
hexyl_10mms_0g_run2	1	190	3.77501	0.416984
hexyl_10mms_0g_run2	1	191	3.77946	0.513533
hexyl_10mms_0g_run2	1	192	3.7806	0.46036
hexyl_10mms_0g_run2	1	193	3.78173	0.523212
hexyl_10mms_0g_run2	1	194	3.78287	0.501582
hexyl_10mms_0g_run2	1	195	3.784	0.478013
hexyl_10mms_0g_run2	1	196	3.78847	0.438417
hexyl_10mms_0g_run2	1	197	3.7896	0.531382
hexyl_10mms_0g_run2	1	198	3.79073	0.470059
hexyl_10mms_0g_run2	1	199	3.79187	0.462927
hexyl_10mms_0g_run2	1	200	3.793	0.524544
hexyl_10mms_0g_run2	1	201	3.79747	0.497977
hexyl_10mms_0g_run2	1	202	3.7986	0.51945
hexyl_10mms_0g_run2	1	203	3.79973	0.478875
hexyl_10mms_0g_run2	1	204	3.80087	0.549426
hexyl_10mms_0g_run2	1	205	3.802	0.518647
hexyl_10mms_0g_run2	1	206	3.80646	0.574543
hexyl_10mms_0g_run2	1	207	3.80759	0.465552
hexyl_10mms_0g_run2	1	208	3.80873	0.47621
hexyl_10mms_0g_run2	1	209	3.80986	0.563552
hexyl_10mms_0g_run2	1	210	3.811	0.420256
hexyl_10mms_0g_run2	1	211	3.81547	0.518647
hexyl_10mms_0g_run2	1	212	3.8166	0.484204
hexyl_10mms_0g_run2	1	213	3.81773	0.599425
hexyl_10mms_0g_run2	1	214	3.81886	0.438848
hexyl_10mms_0g_run2	1	215	3.81999	0.509007
hexyl_10mms_0g_run2	1	216	3.82447	0.424135
hexyl_10mms_0g_run2	1	217	3.8256	0.597407
hexyl_10mms_0g_run2	1	218	3.82673	0.435968
hexyl_10mms_0g_run2	1	219	3.82787	0.53959
hexyl_10mms_0g_run2	1	220	3.829	0.528756
hexyl_10mms_0g_run2	1	221	3.83347	0.600365
hexyl_10mms_0g_run2	1	222	3.8346	0.473879
hexyl_10mms_0g_run2	1	223	3.83573	0.481598
hexyl_10mms_0g_run2	1	224	3.83687	0.546252
hexyl_10mms_0g_run2	1	225	3.838	0.454718
hexyl_10mms_0g_run2	1	226	3.84247	0.487632
hexyl_10mms_0g_run2	1	227	3.8436	0.474251
hexyl_10mms_0g_run2	1	228	3.84474	0.55689
hexyl_10mms_0g_run2	1	229	3.84587	0.434695
hexyl_10mms_0g_run2	1	230	3.84701	0.551189
hexyl_10mms_0g_run2	1	231	3.85143	0.469569
hexyl_10mms_0g_run2	1	232	3.85254	0.543666
hexyl_10mms_0g_run2	1	233	3.85364	0.448448
hexyl_10mms_0g_run2	1	234	3.85474	0.553011
hexyl_10mms_0g_run2	1	235	3.85584	0.533399
hexyl_10mms_0g_run2	1	236	3.86046	0.425526
hexyl_10mms_0g_run2	1	237	3.86159	0.557223
hexyl_10mms_0g_run2	1	238	3.86273	0.472116
hexyl_10mms_0g_run2	1	239	3.86386	0.505265
hexyl_10mms_0g_run2	1	240	3.86499	0.548211
hexyl_10mms_0g_run2	1	241	3.86947	0.54778
hexyl_10mms_0g_run2	1	242	3.87061	0.449761
hexyl_10mms_0g_run2	1	243	3.87174	0.530519
hexyl_10mms_0g_run2	1	244	3.87287	0.520821
hexyl_10mms_0g_run2	1	245	3.874	0.421176
hexyl_10mms_0g_run2	1	246	3.87847	0.477366
hexyl_10mms_0g_run2	1	247	3.8796	0.486692
hexyl_10mms_0g_run2	1	248	3.88074	0.556518
hexyl_10mms_0g_run2	1	249	3.88187	0.424311
hexyl_10mms_0g_run2	1	250	3.883	0.587454
hexyl_10mms_0g_run2	1	251	3.88747	0.437496
hexyl_10mms_0g_run2	1	252	3.8886	0.582301
hexyl_10mms_0g_run2	1	253	3.88974	0.416024
hexyl_10mms_0g_run2	1	254	3.89087	0.534007
hexyl_10mms_0g_run2	1	255	3.892	0.508968
hexyl_10mms_0g_run2	1	256	3.89647	0.581086
hexyl_10mms_0g_run2	1	257	3.89761	0.42676
hexyl_10mms_0g_run2	1	258	3.89874	0.566863
hexyl_10mms_0g_run2	1	259	3.89988	0.491943
hexyl_10mms_0g_run2	1	260	3.90101	0.440945
hexyl_10mms_0g_run2	1	261	3.90547	0.41138
hexyl_10mms_0g_run2	1	262	3.90661	0.375586
hexyl_10mms_0g_run2	1	263	3.90774	0.431795
hexyl_10mms_0g_run2	1	264	3.90887	0.344806
hexyl_10mms_0g_run2	1	265	3.91001	0.411948
hexyl_10mms_0g_run2	1	266	3.91447	0.347882
hexyl_10mms_0g_run2	1	267	3.9156	0.393826
hexyl_10mms_0g_run2	1	268	3.91673	0.464142
hexyl_10mms_0g_run2	2	1	4.60191	0.287577
hexyl_10mms_0g_run2	2	2	4.60304	0.346764
hexyl_10mms_0g_run2	2	3	4.6075	0.261147
hexyl_10mms_0g_run2	2	4	4.60864	0.348959
hexyl_10mms_0g_run2	2	5	4.60977	0.257562
hexyl_10mms_0g_run2	2	6	4.6109	0.277115
hexyl_10mms_0g_run2	2	7	4.61203	0.379914
hexyl_10mms_0g_run2	2	8	4.61651	0.340338
hexyl_10mms_0g_run2	2	9	4.61764	0.250901
hexyl_10mms_0g_run2	2	10	4.61878	0.359127
hexyl_10mms_0g_run2	2	11	4.61991	0.259658
hexyl_10mms_0g_run2	2	12	4.62104	0.296197
hexyl_10mms_0g_run2	2	13	4.6255	0.28166
hexyl_10mms_0g_run2	2	14	4.62664	0.284619
hexyl_10mms_0g_run2	2	15	4.62777	0.347137
hexyl_10mms_0g_run2	2	16	4.62891	0.248667
hexyl_10mms_0g_run2	2	17	4.63004	0.34218
hexyl_10mms_0g_run2	2	18	4.6345	0.312616
hexyl_10mms_0g_run2	2	19	4.63563	0.477462
hexyl_10mms_0g_run2	2	20	4.63677	0.401759
hexyl_10mms_0g_run2	2	21	4.63791	0.444039
hexyl_10mms_0g_run2	2	22	4.63904	0.535866
hexyl_10mms_0g_run2	2	23	4.6435	0.589313
hexyl_10mms_0g_run2	2	24	4.64464	0.565254
hexyl_10mms_0g_run2	2	25	4.64577	0.507869
hexyl_10mms_0g_run2	2	26	4.64691	0.6533
hexyl_10mms_0g_run2	2	27	4.64804	0.501149
hexyl_10mms_0g_run2	2	28	4.65251	0.618916
hexyl_10mms_0g_run2	2	29	4.65364	0.552931
hexyl_10mms_0g_run2	2	30	4.65478	0.703417
hexyl_10mms_0g_run2	2	31	4.65591	0.555576
hexyl_10mms_0g_run2	2	32	4.65705	0.679789
hexyl_10mms_0g_run2	2	33	4.66151	0.53906
hexyl_10mms_0g_run2	2	34	4.66264	0.628869
hexyl_10mms_0g_run2	2	35	4.66377	0.616036
hexyl_10mms_0g_run2	2	36	4.6649	0.540431
hexyl_10mms_0g_run2	2	37	4.66604	0.616683
hexyl_10mms_0g_run2	2	38	4.6705	0.547073
hexyl_10mms_0g_run2	2	39	4.67164	0.580379
hexyl_10mms_0g_run2	2	40	4.67277	0.514668
hexyl_10mms_0g_run2	2	41	4.67391	0.558985
hexyl_10mms_0g_run2	2	42	4.67504	0.567292
hexyl_10mms_0g_run2	2	43	4.67951	0.562217
hexyl_10mms_0g_run2	2	44	4.68064	0.483967
hexyl_10mms_0g_run2	2	45	4.68178	0.616781
hexyl_10mms_0g_run2	2	46	4.68291	0.501854
hexyl_10mms_0g_run2	2	47	4.68405	0.558456
hexyl_10mms_0g_run2	2	48	4.68851	0.511298
hexyl_10mms_0g_run2	2	49	4.68964	0.506067
hexyl_10mms_0g_run2	2	50	4.69078	0.541391
hexyl_10mms_0g_run2	2	51	4.69191	0.489688
hexyl_10mms_0g_run2	2	52	4.69305	0.559259
hexyl_10mms_0g_run2	2	53	4.69751	0.473407
hexyl_10mms_0g_run2	2	54	4.69864	0.611824
hexyl_10mms_0g_run2	2	55	4.69978	0.483634
hexyl_10mms_0g_run2	2	56	4.70091	0.529205
hexyl_10mms_0g_run2	2	57	4.70204	0.572954
hexyl_10mms_0g_run2	2	58	4.70651	0.568036
hexyl_10mms_0g_run2	2	59	4.70764	0.472565
hexyl_10mms_0g_run2	2	60	4.70878	0.501443
hexyl_10mms_0g_run2	2	61	4.70991	0.542978
hexyl_10mms_0g_run2	2	62	4.71105	0.472349
hexyl_10mms_0g_run2	2	63	4.71547	0.51359
hexyl_10mms_0g_run2	2	64	4.71657	0.540039
hexyl_10mms_0g_run2	2	65	4.71768	0.481538
hexyl_10mms_0g_run2	2	66	4.71878	0.584082
hexyl_10mms_0g_run2	2	67	4.71988	0.438279
hexyl_10mms_0g_run2	2	68	4.7245	0.556203
hexyl_10mms_0g_run2	2	69	4.72563	0.422037
hexyl_10mms_0g_run2	2	70	4.72677	0.57987
hexyl_10mms_0g_run2	2	71	4.7279	0.470899
hexyl_10mms_0g_run2	2	72	4.72903	0.512983
hexyl_10mms_0g_run2	2	73	4.73351	0.53904
hexyl_10mms_0g_run2	2	74	4.73464	0.527187
hexyl_10mms_0g_run2	2	75	4.73578	0.470213
hexyl_10mms_0g_run2	2	76	4.73691	0.55826
hexyl_10mms_0g_run2	2	77	4.73805	0.457577
hexyl_10mms_0g_run2	2	78	4.74251	0.527951
hexyl_10mms_0g_run2	2	79	4.74365	0.462827
hexyl_10mms_0g_run2	2	80	4.74478	0.579929
hexyl_10mms_0g_run2	2	81	4.74592	0.468195
hexyl_10mms_0g_run2	2	82	4.74705	0.477698
hexyl_10mms_0g_run2	2	83	4.75151	0.5083
hexyl_10mms_0g_run2	2	84	4.75264	0.437299
hexyl_10mms_0g_run2	2	85	4.75377	0.587217
hexyl_10mms_0g_run2	2	86	4.75491	0.434674
hexyl_10mms_0g_run2	2	87	4.75604	0.540157
hexyl_10mms_0g_run2	2	88	4.76051	0.491686
hexyl_10mms_0g_run2	2	89	4.76165	0.553519
hexyl_10mms_0g_run2	2	90	4.76278	0.448956
hexyl_10mms_0g_run2	2	91	4.76391	0.526619
hexyl_10mms_0g_run2	2	92	4.76505	0.565705
hexyl_10mms_0g_run2	2	93	4.76951	0.56641
hexyl_10mms_0g_run2	2	94	4.77064	0.475484
hexyl_10mms_0g_run2	2	95	4.77178	0.476287
hexyl_10mms_0g_run2	2	96	4.77291	0.562942
hexyl_10mms_0g_run2	2	97	4.77405	0.404502
hexyl_10mms_0g_run2	2	98	4.77851	0.520389
hexyl_10mms_0g_run2	2	99	4.77964	0.445038
hexyl_10mms_0g_run2	2	100	4.78078	0.570544
hexyl_10mms_0g_run2	2	101	4.78191	0.483967
hexyl_10mms_0g_run2	2	102	4.78304	0.504597
hexyl_10mms_0g_run2	2	103	4.78751	0.441315
hexyl_10mms_0g_run2	2	104	4.78864	0.56018
hexyl_10mms_0g_run2	2	105	4.78978	0.48671
hexyl_10mms_0g_run2	2	106	4.79091	0.47084
hexyl_10mms_0g_run2	2	107	4.79205	0.543213
hexyl_10mms_0g_run2	2	108	4.79651	0.554655
hexyl_10mms_0g_run2	2	109	4.79765	0.510005
hexyl_10mms_0g_run2	2	110	4.79878	0.479285
hexyl_10mms_0g_run2	2	111	4.79991	0.551128
hexyl_10mms_0g_run2	2	112	4.80105	0.505753
hexyl_10mms_0g_run2	2	113	4.80551	0.543194
hexyl_10mms_0g_run2	2	114	4.80665	0.43295
hexyl_10mms_0g_run2	2	115	4.80778	0.54049
hexyl_10mms_0g_run2	2	116	4.80892	0.452639
hexyl_10mms_0g_run2	2	117	4.81005	0.53375
hexyl_10mms_0g_run2	2	118	4.81451	0.505185
hexyl_10mms_0g_run2	2	119	4.81564	0.468254
hexyl_10mms_0g_run2	2	120	4.81678	0.562981
hexyl_10mms_0g_run2	2	121	4.81792	0.463964
hexyl_10mms_0g_run2	2	122	4.81905	0.554067
hexyl_10mms_0g_run2	2	123	4.82352	0.47662
hexyl_10mms_0g_run2	2	124	4.82465	0.513335
hexyl_10mms_0g_run2	2	125	4.82579	0.477658
hexyl_10mms_0g_run2	2	126	4.82693	0.532888
hexyl_10mms_0g_run2	2	127	4.82806	0.44055
hexyl_10mms_0g_run2	2	128	4.83251	0.592721
hexyl_10mms_0g_run2	2	129	4.83365	0.453344
hexyl_10mms_0g_run2	2	130	4.83478	0.489628
hexyl_10mms_0g_run2	2	131	4.83592	0.557377
hexyl_10mms_0g_run2	2	132	4.83705	0.422584
hexyl_10mms_0g_run2	2	133	4.84151	0.490666
hexyl_10mms_0g_run2	2	134	4.84265	0.44872
hexyl_10mms_0g_run2	2	135	4.84378	0.576107
hexyl_10mms_0g_run2	2	136	4.84491	0.436671
hexyl_10mms_0g_run2	2	137	4.84605	0.545406
hexyl_10mms_0g_run2	2	138	4.85051	0.436416
hexyl_10mms_0g_run2	2	139	4.85165	0.575872
hexyl_10mms_0g_run2	2	140	4.85278	0.451502
hexyl_10mms_0g_run2	2	141	4.85392	0.524306
hexyl_10mms_0g_run2	2	142	4.85505	0.528185
hexyl_10mms_0g_run2	2	143	4.85948	0.567839
hexyl_10mms_0g_run2	2	144	4.86058	0.423917
hexyl_10mms_0g_run2	2	145	4.86169	0.55144
hexyl_10mms_0g_run2	2	146	4.86279	0.494957
hexyl_10mms_0g_run2	2	147	4.86389	0.493487
hexyl_10mms_0g_run2	2	148	4.8685	0.527969
hexyl_10mms_0g_run2	2	149	4.86964	0.505125
hexyl_10mms_0g_run2	2	150	4.87077	0.438865
hexyl_10mms_0g_run2	2	151	4.8719	0.563039
hexyl_10mms_0g_run2	2	152	4.87304	0.434222
hexyl_10mms_0g_run2	2	153	4.87752	0.473465
hexyl_10mms_0g_run2	2	154	4.87865	0.471192
hexyl_10mms_0g_run2	2	155	4.87978	0.564685
hexyl_10mms_0g_run2	2	156	4.88091	0.427482
hexyl_10mms_0g_run2	2	157	4.88205	0.576205
hexyl_10mms_0g_run2	2	158	4.88651	0.428736
hexyl_10mms_0g_run2	2	159	4.88765	0.584022
hexyl_10mms_0g_run2	2	160	4.88878	0.464393
hexyl_10mms_0g_run2	2	161	4.88991	0.469174
hexyl_10mms_0g_run2	2	162	4.89104	0.520877
hexyl_10mms_0g_run2	2	163	4.89551	0.574304
hexyl_10mms_0g_run2	2	164	4.89665	0.485612
hexyl_10mms_0g_run2	2	165	4.89778	0.475267
hexyl_10mms_0g_run2	2	166	4.89891	0.573638
hexyl_10mms_0g_run2	2	167	4.90005	0.422526
hexyl_10mms_0g_run2	2	168	4.90452	0.468214
hexyl_10mms_0g_run2	2	169	4.90566	0.500991
hexyl_10mms_0g_run2	2	170	4.90679	0.507182
hexyl_10mms_0g_run2	2	171	4.90793	0.4372
hexyl_10mms_0g_run2	2	172	4.90906	0.542957
hexyl_10mms_0g_run2	2	173	4.91352	0.443646
hexyl_10mms_0g_run2	2	174	4.91465	0.553537
hexyl_10mms_0g_run2	2	175	4.91579	0.46888
hexyl_10mms_0g_run2	2	176	4.91692	0.487963
hexyl_10mms_0g_run2	2	177	4.91805	0.519153
hexyl_10mms_0g_run2	2	178	4.92252	0.527479
hexyl_10mms_0g_run2	2	179	4.92365	0.461866
hexyl_10mms_0g_run2	2	180	4.92479	0.48089
hexyl_10mms_0g_run2	2	181	4.92592	0.53322
hexyl_10mms_0g_run2	2	182	4.92706	0.431792
hexyl_10mms_0g_run2	2	183	4.93152	0.539822
hexyl_10mms_0g_run2	2	184	4.93265	0.473112
hexyl_10mms_0g_run2	2	185	4.93379	0.548874
hexyl_10mms_0g_run2	2	186	4.93492	0.512629
hexyl_10mms_0g_run2	2	187	4.93605	0.464668
hexyl_10mms_0g_run2	2	188	4.94052	0.440922
hexyl_10mms_0g_run2	2	189	4.94166	0.541155
hexyl_10mms_0g_run2	2	190	4.94279	0.484749
hexyl_10mms_0g_run2	2	191	4.94392	0.462767
hexyl_10mms_0g_run2	2	192	4.94506	0.54952
hexyl_10mms_0g_run2	2	193	4.94952	0.473523
hexyl_10mms_0g_run2	2	194	4.95065	0.591682
hexyl_10mms_0g_run2	2	195	4.95178	0.428912
hexyl_10mms_0g_run2	2	196	4.95292	0.537334
hexyl_10mms_0g_run2	2	197	4.95405	0.510846
hexyl_10mms_0g_run2	2	198	4.95852	0.59131
hexyl_10mms_0g_run2	2	199	4.95965	0.450111
hexyl_10mms_0g_run2	2	200	4.96078	0.496172
hexyl_10mms_0g_run2	2	201	4.96192	0.551969
hexyl_10mms_0g_run2	2	202	4.96305	0.424837
hexyl_10mms_0g_run2	2	203	4.96752	0.468233
hexyl_10mms_0g_run2	2	204	4.96865	0.47174
hexyl_10mms_0g_run2	2	205	4.96979	0.562608
hexyl_10mms_0g_run2	2	206	4.97093	0.418823
hexyl_10mms_0g_run2	2	207	4.97206	0.571247
hexyl_10mms_0g_run2	2	208	4.97652	0.435044
hexyl_10mms_0g_run2	2	209	4.97766	0.582943
hexyl_10mms_0g_run2	2	210	4.97879	0.417352
hexyl_10mms_0g_run2	2	211	4.97993	0.564742
hexyl_10mms_0g_run2	2	212	4.98106	0.493212
hexyl_10mms_0g_run2	2	213	4.98552	0.557924
hexyl_10mms_0g_run2	2	214	4.98666	0.439452
hexyl_10mms_0g_run2	2	215	4.98779	0.494858
hexyl_10mms_0g_run2	2	216	4.98892	0.532611
hexyl_10mms_0g_run2	2	217	4.99006	0.396565
hexyl_10mms_0g_run2	2	218	4.99452	0.509924
hexyl_10mms_0g_run2	2	219	4.99565	0.457065
hexyl_10mms_0g_run2	2	220	4.99679	0.533689
hexyl_10mms_0g_run2	2	221	4.99792	0.513039
hexyl_10mms_0g_run2	2	222	4.99906	0.49092
hexyl_10mms_0g_run2	2	223	5.00349	0.458574
hexyl_10mms_0g_run2	2	224	5.00459	0.539606
hexyl_10mms_0g_run2	2	225	5.00569	0.437023
hexyl_10mms_0g_run2	2	226	5.00679	0.488667
hexyl_10mms_0g_run2	2	227	5.0079	0.503753
hexyl_10mms_0g_run2	2	228	5.01251	0.45973
hexyl_10mms_0g_run2	2	229	5.01364	0.491743
hexyl_10mms_0g_run2	2	230	5.01478	0.521699
hexyl_10mms_0g_run2	2	231	5.01591	0.471975
hexyl_10mms_0g_run2	2	232	5.01705	0.550244
hexyl_10mms_0g_run2	2	233	5.02152	0.576478
hexyl_10mms_0g_run2	2	234	5.02266	0.421721
hexyl_10mms_0g_run2	2	235	5.02379	0.509591
hexyl_10mms_0g_run2	2	236	5.02493	0.51876
hexyl_10mms_0g_run2	2	237	5.02606	0.413865
hexyl_10mms_0g_run2	2	238	5.03052	0.437983
hexyl_10mms_0g_run2	2	239	5.03165	0.471681
hexyl_10mms_0g_run2	2	240	5.03279	0.531005
hexyl_10mms_0g_run2	2	241	5.03392	0.369215
hexyl_10mms_0g_run2	2	242	5.03506	0.452696
hexyl_10mms_0g_run2	2	243	5.03952	0.325878
hexyl_10mms_0g_run2	2	244	5.04066	0.423504
hexyl_10mms_0g_run2	2	245	5.04179	0.361398
hexyl_10mms_0g_run2	2	246	5.04292	0.377287
hexyl_10mms_0g_run2	2	247	5.04405	0.425307
hexyl_10mms_0g_run2	2	248	5.04853	0.493741
hexyl_10mms_0g_run2	2	249	5.04966	0.361457
hexyl_10mms_0g_run2	2	250	5.05079	0.417294
hexyl_10mms_0g_run2	2	251	5.05193	0.40836
hexyl_10mms_0g_run2	2	252	5.05306	0.340278
hexyl_10mms_0g_run2	2	253	5.05752	0.389865
hexyl_10mms_0g_run2	2	254	5.05866	0.322919
hexyl_10mms_0g_run2	2	255	5.05979	0.378658
hexyl_10mms_0g_run2	2	256	5.06092	0.417019
hexyl_10mms_0g_run2	2	257	5.06206	0.312281
hexyl_10mms_0g_run2	2	258	5.06652	0.354776
hexyl_10mms_0g_run2	2	259	5.06766	0.38242
hexyl_10mms_0g_run2	2	260	5.06879	0.446838
hexyl_10mms_0g_run2	2	261	5.06992	0.303445
hexyl_10mms_0g_run2	2	262	5.07105	0.444918
hexyl_10mms_0g_run2	2	263	5.07552	0.331011
hexyl_10mms_0g_run2	2	264	5.07666	0.43379
hexyl_10mms_0g_run2	2	265	5.07779	0.300859
hexyl_10mms_0g_run2	2	266	5.07893	0.429147
hexyl_10mms_0g_run2	2	267	5.08006	0.366844
hexyl_10mms_0g_run2	2	268	5.08453	0.439217
hexyl_10mms_0g_run2	3	1	5.9317	0.261756
hexyl_10mms_0g_run2	3	2	5.93283	0.373489
hexyl_10mms_0g_run2	3	3	5.93397	0.265576
hexyl_10mms_0g_run2	3	4	5.9351	0.286794
hexyl_10mms_0g_run2	3	5	5.93956	0.237501
hexyl_10mms_0g_run2	3	6	5.94069	0.247434
hexyl_10mms_0g_run2	3	7	5.94182	0.363575
hexyl_10mms_0g_run2	3	8	5.94296	0.224864
hexyl_10mms_0g_run2	3	9	5.94409	0.319572
hexyl_10mms_0g_run2	3	10	5.94857	0.320689
hexyl_10mms_0g_run2	3	11	5.9497	0.302919
hexyl_10mms_0g_run2	3	12	5.95083	0.251274
hexyl_10mms_0g_run2	3	13	5.95197	0.326644
hexyl_10mms_0g_run2	3	14	5.9531	0.267418
hexyl_10mms_0g_run2	3	15	5.95756	0.338792
hexyl_10mms_0g_run2	3	16	5.9587	0.258151
hexyl_10mms_0g_run2	3	17	5.95983	0.247512
hexyl_10mms_0g_run2	3	18	5.96096	0.354739
hexyl_10mms_0g_run2	3	19	5.96209	0.240165
hexyl_10mms_0g_run2	3	20	5.96656	0.294866
hexyl_10mms_0g_run2	3	21	5.96769	0.229272
hexyl_10mms_0g_run2	3	22	5.96883	0.365182
hexyl_10mms_0g_run2	3	23	5.96996	0.228821
hexyl_10mms_0g_run2	3	24	5.9711	0.298804
hexyl_10mms_0g_run2	3	25	5.97557	0.232838
hexyl_10mms_0g_run2	3	26	5.9767	0.373959
hexyl_10mms_0g_run2	3	27	5.97783	0.241282
hexyl_10mms_0g_run2	3	28	5.97897	0.316633
hexyl_10mms_0g_run2	3	29	5.9801	0.336361
hexyl_10mms_0g_run2	3	30	5.98457	0.436712
hexyl_10mms_0g_run2	3	31	5.9857	0.355875
hexyl_10mms_0g_run2	3	32	5.98684	0.400408
hexyl_10mms_0g_run2	3	33	5.98797	0.491961
hexyl_10mms_0g_run2	3	34	5.9891	0.365789
hexyl_10mms_0g_run2	3	35	5.99357	0.532536
hexyl_10mms_0g_run2	3	36	5.9947	0.498426
hexyl_10mms_0g_run2	3	37	5.99584	0.615332
hexyl_10mms_0g_run2	3	38	5.99697	0.481871
hexyl_10mms_0g_run2	3	39	5.99811	0.661157
hexyl_10mms_0g_run2	3	40	6.00257	0.555243
hexyl_10mms_0g_run2	3	41	6.0037	0.615038
hexyl_10mms_0g_run2	3	42	6.00483	0.653027
hexyl_10mms_0g_run2	3	43	6.00597	0.562923
hexyl_10mms_0g_run2	3	44	6.0071	0.649206
hexyl_10mms_0g_run2	3	45	6.01153	0.641076
hexyl_10mms_0g_run2	3	46	6.01264	0.50691
hexyl_10mms_0g_run2	3	47	6.01374	0.645543
hexyl_10mms_0g_run2	3	48	6.01484	0.534476
hexyl_10mms_0g_run2	3	49	6.01594	0.594956
hexyl_10mms_0g_run2	3	50	6.02055	0.527814
hexyl_10mms_0g_run2	3	51	6.02169	0.560141
hexyl_10mms_0g_run2	3	52	6.02282	0.490962
hexyl_10mms_0g_run2	3	53	6.02396	0.567233
hexyl_10mms_0g_run2	3	54	6.02509	0.487964
hexyl_10mms_0g_run2	3	55	6.02957	0.508575
hexyl_10mms_0g_run2	3	56	6.03071	0.520879
hexyl_10mms_0g_run2	3	57	6.03184	0.59235
hexyl_10mms_0g_run2	3	58	6.03298	0.468862
hexyl_10mms_0g_run2	3	59	6.03411	0.593173
hexyl_10mms_0g_run2	3	60	6.03857	0.434165
hexyl_10mms_0g_run2	3	61	6.0397	0.549248
hexyl_10mms_0g_run2	3	62	6.04083	0.469195
hexyl_10mms_0g_run2	3	63	6.04196	0.469646
hexyl_10mms_0g_run2	3	64	6.0431	0.541783
hexyl_10mms_0g_run2	3	65	6.04757	0.562727
hexyl_10mms_0g_run2	3	66	6.0487	0.502932
hexyl_10mms_0g_run2	3	67	6.04984	0.486945
hexyl_10mms_0g_run2	3	68	6.05097	0.556889
hexyl_10mms_0g_run2	3	69	6.05211	0.433126
hexyl_10mms_0g_run2	3	70	6.05657	0.462945
hexyl_10mms_0g_run2	3	71	6.05771	0.479363
hexyl_10mms_0g_run2	3	72	6.05884	0.564353
hexyl_10mms_0g_run2	3	73	6.05997	0.436202
hexyl_10mms_0g_run2	3	74	6.06111	0.542939
hexyl_10mms_0g_run2	3	75	6.06557	0.471742
hexyl_10mms_0g_run2	3	76	6.0667	0.559357
hexyl_10mms_0g_run2	3	77	6.06784	0.51359
hexyl_10mms_0g_run2	3	78	6.06897	0.510867
hexyl_10mms_0g_run2	3	79	6.07011	0.529891
hexyl_10mms_0g_run2	3	80	6.07457	0.469979
hexyl_10mms_0g_run2	3	81	6.0757	0.560866
hexyl_10mms_0g_run2	3	82	6.07683	0.432578
hexyl_10mms_0g_run2	3	83	6.07797	0.54194
hexyl_10mms_0g_run2	3	84	6.07911	0.499602
hexyl_10mms_0g_run2	3	85	6.08357	0.581908
hexyl_10mms_0g_run2	3	86	6.0847	0.445822
hexyl_10mms_0g_run2	3	87	6.08584	0.520546
hexyl_10mms_0g_run2	3	88	6.08697	0.535005
hexyl_10mms_0g_run2	3	89	6.0881	0.426308
hexyl_10mms_0g_run2	3	90	6.09257	0.458929
hexyl_10mms_0g_run2	3	91	6.0937	0.467216
hexyl_10mms_0g_run2	3	92	6.09484	0.568997
hexyl_10mms_0g_run2	3	93	6.09597	0.422449
hexyl_10mms_0g_run2	3	94	6.09711	0.562512
hexyl_10mms_0g_run2	3	95	6.10157	0.424486
hexyl_10mms_0g_run2	3	96	6.1027	0.562806
hexyl_10mms_0g_run2	3	97	6.10384	0.445822
hexyl_10mms_0g_run2	3	98	6.10497	0.511651
hexyl_10mms_0g_run2	3	99	6.10611	0.513924
hexyl_10mms_0g_run2	3	100	6.11057	0.554812
hexyl_10mms_0g_run2	3	101	6.1117	0.502325
hexyl_10mms_0g_run2	3	102	6.11284	0.478129
hexyl_10mms_0g_run2	3	103	6.11397	0.544526
hexyl_10mms_0g_run2	3	104	6.11511	0.453855
hexyl_10mms_0g_run2	3	105	6.11958	0.464238
hexyl_10mms_0g_run2	3	106	6.12071	0.464434
hexyl_10mms_0g_run2	3	107	6.12184	0.551599
hexyl_10mms_0g_run2	3	108	6.12298	0.38444
hexyl_10mms_0g_run2	3	109	6.12411	0.50346
hexyl_10mms_0g_run2	3	110	6.12857	0.446154
hexyl_10mms_0g_run2	3	111	6.12971	0.557808
hexyl_10mms_0g_run2	3	112	6.13084	0.430656
hexyl_10mms_0g_run2	3	113	6.13198	0.557534
hexyl_10mms_0g_run2	3	114	6.13311	0.464609
hexyl_10mms_0g_run2	3	115	6.13757	0.506634
hexyl_10mms_0g_run2	3	116	6.13871	0.509396
hexyl_10mms_0g_run2	3	117	6.13984	0.422859
hexyl_10mms_0g_run2	3	118	6.14098	0.514138
hexyl_10mms_0g_run2	3	119	6.14211	0.477892
hexyl_10mms_0g_run2	3	120	6.14657	0.550716
hexyl_10mms_0g_run2	3	121	6.14771	0.447368
hexyl_10mms_0g_run2	3	122	6.14884	0.523796
hexyl_10mms_0g_run2	3	123	6.14997	0.544525
hexyl_10mms_0g_run2	3	124	6.1511	0.41559
hexyl_10mms_0g_run2	3	125	6.15554	0.443332
hexyl_10mms_0g_run2	3	126	6.15664	0.510004
hexyl_10mms_0g_run2	3	127	6.15774	0.429128
hexyl_10mms_0g_run2	3	128	6.15884	0.552185
hexyl_10mms_0g_run2	3	129	6.15995	0.459652
hexyl_10mms_0g_run2	3	130	6.16456	0.518644
hexyl_10mms_0g_run2	3	131	6.16569	0.445389
hexyl_10mms_0g_run2	3	132	6.16683	0.586177
hexyl_10mms_0g_run2	3	133	6.16796	0.428717
hexyl_10mms_0g_run2	3	134	6.16909	0.495819
hexyl_10mms_0g_run2	3	135	6.17357	0.556632
hexyl_10mms_0g_run2	3	136	6.17471	0.444939
hexyl_10mms_0g_run2	3	137	6.17584	0.498327
hexyl_10mms_0g_run2	3	138	6.17698	0.510121
hexyl_10mms_0g_run2	3	139	6.17811	0.429481
hexyl_10mms_0g_run2	3	140	6.18257	0.50536
hexyl_10mms_0g_run2	3	141	6.18371	0.474072
hexyl_10mms_0g_run2	3	142	6.18484	0.517821
hexyl_10mms_0g_run2	3	143	6.18598	0.442842
hexyl_10mms_0g_run2	3	144	6.18711	0.522993
hexyl_10mms_0g_run2	3	145	6.19157	0.461533
hexyl_10mms_0g_run2	3	146	6.19271	0.495427
hexyl_10mms_0g_run2	3	147	6.19384	0.532965
hexyl_10mms_0g_run2	3	148	6.19498	0.454225
hexyl_10mms_0g_run2	3	149	6.19611	0.55483
hexyl_10mms_0g_run2	3	150	6.20058	0.546033
hexyl_10mms_0g_run2	3	151	6.20171	0.468586
hexyl_10mms_0g_run2	3	152	6.20284	0.437004
hexyl_10mms_0g_run2	3	153	6.20398	0.531496
hexyl_10mms_0g_run2	3	154	6.20511	0.446859
hexyl_10mms_0g_run2	3	155	6.20958	0.539176
hexyl_10mms_0g_run2	3	156	6.21071	0.435809
hexyl_10mms_0g_run2	3	157	6.21184	0.509925
hexyl_10mms_0g_run2	3	158	6.21298	0.515235
hexyl_10mms_0g_run2	3	159	6.21411	0.416824
hexyl_10mms_0g_run2	3	160	6.21858	0.446918
hexyl_10mms_0g_run2	3	161	6.21971	0.47803
hexyl_10mms_0g_run2	3	162	6.22085	0.515058
hexyl_10mms_0g_run2	3	163	6.22198	0.413631
hexyl_10mms_0g_run2	3	164	6.22311	0.543545
hexyl_10mms_0g_run2	3	165	6.22758	0.427365
hexyl_10mms_0g_run2	3	166	6.22871	0.56347
hexyl_10mms_0g_run2	3	167	6.22984	0.426679
hexyl_10mms_0g_run2	3	168	6.23098	0.541684
hexyl_10mms_0g_run2	3	169	6.23211	0.50732
hexyl_10mms_0g_run2	3	170	6.23658	0.569798
hexyl_10mms_0g_run2	3	171	6.23771	0.424681
hexyl_10mms_0g_run2	3	172	6.23885	0.507359
hexyl_10mms_0g_run2	3	173	6.23998	0.492038
hexyl_10mms_0g_run2	3	174	6.24112	0.419881
hexyl_10mms_0g_run2	3	175	6.24558	0.469056
hexyl_10mms_0g_run2	3	176	6.24671	0.458536
hexyl_10mms_0g_run2	3	177	6.24784	0.543996
hexyl_10mms_0g_run2	3	178	6.24897	0.512511
hexyl_10mms_0g_run2	3	179	6.25011	0.482105
hexyl_10mms_0g_run2	3	180	6.25458	0.449563
hexyl_10mms_0g_run2	3	181	6.25571	0.496524
hexyl_10mms_0g_run2	3	182	6.25684	0.490999
hexyl_10mms_0g_run2	3	183	6.25798	0.470193
hexyl_10mms_0g_run2	3	184	6.25911	0.5409
hexyl_10mms_0g_run2	3	185	6.26358	0.53802
hexyl_10mms_0g_run2	3	186	6.26472	0.462826
hexyl_10mms_0g_run2	3	187	6.26585	0.546543
hexyl_10mms_0g_run2	3	188	6.26699	0.482301
hexyl_10mms_0g_run2	3	189	6.26813	0.462826
hexyl_10mms_0g_run2	3	190	6.27258	0.533514
hexyl_10mms_0g_run2	3	191	6.27372	0.429912
hexyl_10mms_0g_run2	3	192	6.27485	0.528694
hexyl_10mms_0g_run2	3	193	6.27598	0.487335
hexyl_10mms_0g_run2	3	194	6.27712	0.455361
hexyl_10mms_0g_run2	3	195	6.28158	0.460847
hexyl_10mms_0g_run2	3	196	6.28271	0.504968
hexyl_10mms_0g_run2	3	197	6.28385	0.538255
hexyl_10mms_0g_run2	3	198	6.28498	0.42135
hexyl_10mms_0g_run2	3	199	6.28612	0.561471
hexyl_10mms_0g_run2	3	200	6.29058	0.425738
hexyl_10mms_0g_run2	3	201	6.29171	0.558493
hexyl_10mms_0g_run2	3	202	6.29285	0.397996
hexyl_10mms_0g_run2	3	203	6.29398	0.551146
hexyl_10mms_0g_run2	3	204	6.29511	0.482966
hexyl_10mms_0g_run2	3	205	6.29955	0.568211
hexyl_10mms_0g_run2	3	206	6.30065	0.485592
hexyl_10mms_0g_run2	3	207	6.30175	0.447211
hexyl_10mms_0g_run2	3	208	6.30286	0.558709
hexyl_10mms_0g_run2	3	209	6.30396	0.461024
hexyl_10mms_0g_run2	3	210	6.30857	0.547698
hexyl_10mms_0g_run2	3	211	6.3097	0.444057
hexyl_10mms_0g_run2	3	212	6.31083	0.460984
hexyl_10mms_0g_run2	3	213	6.31197	0.555809
hexyl_10mms_0g_run2	3	214	6.3131	0.406519
hexyl_10mms_0g_run2	3	215	6.31758	0.455283
hexyl_10mms_0g_run2	3	216	6.31871	0.525363
hexyl_10mms_0g_run2	3	217	6.31985	0.476854
hexyl_10mms_0g_run2	3	218	6.32098	0.49049
hexyl_10mms_0g_run2	3	219	6.32212	0.524031
hexyl_10mms_0g_run2	3	220	6.32658	0.503714
hexyl_10mms_0g_run2	3	221	6.32771	0.532142
hexyl_10mms_0g_run2	3	222	6.32885	0.434947
hexyl_10mms_0g_run2	3	223	6.32998	0.539999
hexyl_10mms_0g_run2	3	224	6.33112	0.46837
hexyl_10mms_0g_run2	3	225	6.33558	0.562373
hexyl_10mms_0g_run2	3	226	6.33671	0.415786
hexyl_10mms_0g_run2	3	227	6.33785	0.526754
hexyl_10mms_0g_run2	3	228	6.33898	0.480165
hexyl_10mms_0g_run2	3	229	6.34012	0.418391
hexyl_10mms_0g_run2	3	230	6.34459	0.438277
hexyl_10mms_0g_run2	3	231	6.34572	0.504067
hexyl_10mms_0g_run2	3	232	6.34685	0.530986
hexyl_10mms_0g_run2	3	233	6.34798	0.439355
hexyl_10mms_0g_run2	3	234	6.34912	0.578124
hexyl_10mms_0g_run2	3	235	6.35358	0.446898
hexyl_10mms_0g_run2	3	236	6.35472	0.55289
hexyl_10mms_0g_run2	3	237	6.35585	0.398153
hexyl_10mms_0g_run2	3	238	6.35698	0.52697
hexyl_10mms_0g_run2	3	239	6.35812	0.468723
hexyl_10mms_0g_run2	3	240	6.36258	0.563881
hexyl_10mms_0g_run2	3	241	6.36371	0.444703
hexyl_10mms_0g_run2	3	242	6.36485	0.490705
hexyl_10mms_0g_run2	3	243	6.36598	0.526402
hexyl_10mms_0g_run2	3	244	6.36712	0.439041
hexyl_10mms_0g_run2	3	245	6.37158	0.453187
hexyl_10mms_0g_run2	3	246	6.37272	0.444743
hexyl_10mms_0g_run2	3	247	6.37385	0.50632
hexyl_10mms_0g_run2	3	248	6.37498	0.446467
hexyl_10mms_0g_run2	3	249	6.37612	0.486297
hexyl_10mms_0g_run2	3	250	6.38059	0.432772
hexyl_10mms_0g_run2	3	251	6.38172	0.530418
hexyl_10mms_0g_run2	3	252	6.38285	0.393059
hexyl_10mms_0g_run2	3	253	6.38399	0.459593
hexyl_10mms_0g_run2	3	254	6.38512	0.447427
hexyl_10mms_0g_run2	3	255	6.38958	0.355619
hexyl_10mms_0g_run2	3	256	6.39072	0.380501
hexyl_10mms_0g_run2	3	257	6.39185	0.294727
hexyl_10mms_0g_run2	3	258	6.39299	0.418313
hexyl_10mms_0g_run2	3	259	6.39412	0.3402
hexyl_10mms_0g_run2	3	260	6.39858	0.460024
hexyl_10mms_0g_run2	3	261	6.39972	0.298861
hexyl_10mms_0g_run2	3	262	6.40085	0.425425
hexyl_10mms_0g_run2	3	263	6.40198	0.397271
hexyl_10mms_0g_run2	3	264	6.40312	0.332187
hexyl_10mms_0g_run2	3	265	6.40759	0.309793
hexyl_10mms_0g_run2	3	266	6.40872	0.392256
hexyl_10mms_0g_run2	3	267	6.40986	0.350505
hexyl_10mms_0g_run2	3	268	6.41099	0.342159
hexyl_10mms_0g_run3	1	1	3.05719	0.298331
hexyl_10mms_0g_run3	1	2	3.05832	0.305756
hexyl_10mms_0g_run3	1	3	3.05945	0.19851
hexyl_10mms_0g_run3	1	4	3.06393	0.198549
hexyl_10mms_0g_run3	1	5	3.06506	0.264711
hexyl_10mms_0g_run3	1	6	3.06619	0.314004
hexyl_10mms_0g_run3	1	7	3.06732	0.191124
hexyl_10mms_0g_run3	1	8	3.06846	0.346037
hexyl_10mms_0g_run3	1	9	3.07292	0.230053
hexyl_10mms_0g_run3	1	10	3.07406	0.348447
hexyl_10mms_0g_run3	1	11	3.07519	0.227349
hexyl_10mms_0g_run3	1	12	3.07632	0.240692
hexyl_10mms_0g_run3	1	13	3.07745	0.306716
hexyl_10mms_0g_run3	1	14	3.08192	0.298821
hexyl_10mms_0g_run3	1	15	3.08305	0.283029
hexyl_10mms_0g_run3	1	16	3.08418	0.204329
hexyl_10mms_0g_run3	1	17	3.08532	0.311771
hexyl_10mms_0g_run3	1	18	3.08645	0.256443
hexyl_10mms_0g_run3	1	19	3.09093	0.223568
hexyl_10mms_0g_run3	1	20	3.09206	0.255052
hexyl_10mms_0g_run3	1	21	3.09319	0.323056
hexyl_10mms_0g_run3	1	22	3.09433	0.258657
hexyl_10mms_0g_run3	1	23	3.09546	0.270726
hexyl_10mms_0g_run3	1	24	3.09993	0.334595
hexyl_10mms_0g_run3	1	25	3.10106	0.425384
hexyl_10mms_0g_run3	1	26	3.10219	0.41551
hexyl_10mms_0g_run3	1	27	3.10333	0.402559
hexyl_10mms_0g_run3	1	28	3.10446	0.516349
hexyl_10mms_0g_run3	1	29	3.10893	0.513136
hexyl_10mms_0g_run3	1	30	3.11006	0.511
hexyl_10mms_0g_run3	1	31	3.1112	0.503986
hexyl_10mms_0g_run3	1	32	3.11233	0.59068
hexyl_10mms_0g_run3	1	33	3.11346	0.493759
hexyl_10mms_0g_run3	1	34	3.11792	0.669459
hexyl_10mms_0g_run3	1	35	3.11906	0.523539
hexyl_10mms_0g_run3	1	36	3.12019	0.655862
hexyl_10mms_0g_run3	1	37	3.12133	0.671046
hexyl_10mms_0g_run3	1	38	3.12246	0.581668
hexyl_10mms_0g_run3	1	39	3.12689	0.496267
hexyl_10mms_0g_run3	1	40	3.128	0.594893
hexyl_10mms_0g_run3	1	41	3.1291	0.525048
hexyl_10mms_0g_run3	1	42	3.1302	0.539761
hexyl_10mms_0g_run3	1	43	3.1313	0.527947
hexyl_10mms_0g_run3	1	44	3.13591	0.483043
hexyl_10mms_0g_run3	1	45	3.13705	0.481554
hexyl_10mms_0g_run3	1	46	3.13818	0.542151
hexyl_10mms_0g_run3	1	47	3.13932	0.44668
hexyl_10mms_0g_run3	1	48	3.14045	0.528613
hexyl_10mms_0g_run3	1	49	3.14493	0.539036
hexyl_10mms_0g_run3	1	50	3.14606	0.428891
hexyl_10mms_0g_run3	1	51	3.14719	0.412336
hexyl_10mms_0g_run3	1	52	3.14833	0.4851
hexyl_10mms_0g_run3	1	53	3.14946	0.415079
hexyl_10mms_0g_run3	1	54	3.15393	0.446367
hexyl_10mms_0g_run3	1	55	3.15506	0.451794
hexyl_10mms_0g_run3	1	56	3.1562	0.498716
hexyl_10mms_0g_run3	1	57	3.15733	0.434004
hexyl_10mms_0g_run3	1	58	3.15846	0.422367
hexyl_10mms_0g_run3	1	59	3.16292	0.365276
hexyl_10mms_0g_run3	1	60	3.16406	0.45389
hexyl_10mms_0g_run3	1	61	3.16519	0.489057
hexyl_10mms_0g_run3	1	62	3.16632	0.36702
hexyl_10mms_0g_run3	1	63	3.16746	0.529064
hexyl_10mms_0g_run3	1	64	3.17193	0.509825
hexyl_10mms_0g_run3	1	65	3.17306	0.433083
hexyl_10mms_0g_run3	1	66	3.17419	0.381929
hexyl_10mms_0g_run3	1	67	3.17533	0.497639
hexyl_10mms_0g_run3	1	68	3.17647	0.401893
hexyl_10mms_0g_run3	1	69	3.18093	0.502086
hexyl_10mms_0g_run3	1	70	3.18206	0.365864
hexyl_10mms_0g_run3	1	71	3.1832	0.490468
hexyl_10mms_0g_run3	1	72	3.18433	0.437296
hexyl_10mms_0g_run3	1	73	3.18547	0.423307
hexyl_10mms_0g_run3	1	74	3.18993	0.389844
hexyl_10mms_0g_run3	1	75	3.19106	0.452127
hexyl_10mms_0g_run3	1	76	3.1922	0.47019
hexyl_10mms_0g_run3	1	77	3.19333	0.373916
hexyl_10mms_0g_run3	1	78	3.19446	0.510177
hexyl_10mms_0g_run3	1	79	3.19893	0.405674
hexyl_10mms_0g_run3	1	80	3.20006	0.510099
hexyl_10mms_0g_run3	1	81	3.2012	0.38191
hexyl_10mms_0g_run3	1	82	3.20233	0.510765
hexyl_10mms_0g_run3	1	83	3.20347	0.417253
hexyl_10mms_0g_run3	1	84	3.20793	0.521306
hexyl_10mms_0g_run3	1	85	3.20907	0.357988
hexyl_10mms_0g_run3	1	86	3.2102	0.47023
hexyl_10mms_0g_run3	1	87	3.21133	0.452715
hexyl_10mms_0g_run3	1	88	3.21247	0.398308
hexyl_10mms_0g_run3	1	89	3.21693	0.423621
hexyl_10mms_0g_run3	1	90	3.21806	0.412473
hexyl_10mms_0g_run3	1	91	3.2192	0.478478
hexyl_10mms_0g_run3	1	92	3.22033	0.409103
hexyl_10mms_0g_run3	1	93	3.22146	0.443683
hexyl_10mms_0g_run3	1	94	3.22593	0.382889
hexyl_10mms_0g_run3	1	95	3.22706	0.447621
hexyl_10mms_0g_run3	1	96	3.2282	0.452479
hexyl_10mms_0g_run3	1	97	3.22933	0.416254
hexyl_10mms_0g_run3	1	98	3.23047	0.4678
hexyl_10mms_0g_run3	1	99	3.23493	0.479281
hexyl_10mms_0g_run3	1	100	3.23607	0.453479
hexyl_10mms_0g_run3	1	101	3.2372	0.378109
hexyl_10mms_0g_run3	1	102	3.23833	0.531082
hexyl_10mms_0g_run3	1	103	3.23946	0.415706
hexyl_10mms_0g_run3	1	104	3.24393	0.502047
hexyl_10mms_0g_run3	1	105	3.24507	0.36892
hexyl_10mms_0g_run3	1	106	3.2462	0.457417
hexyl_10mms_0g_run3	1	107	3.24733	0.402011
hexyl_10mms_0g_run3	1	108	3.24847	0.411494
hexyl_10mms_0g_run3	1	109	3.25293	0.371898
hexyl_10mms_0g_run3	1	110	3.25407	0.480261
hexyl_10mms_0g_run3	1	111	3.2552	0.46784
hexyl_10mms_0g_run3	1	112	3.25633	0.360124
hexyl_10mms_0g_run3	1	113	3.25747	0.531161
hexyl_10mms_0g_run3	1	114	3.26193	0.415882
hexyl_10mms_0g_run3	1	115	3.26306	0.4736
hexyl_10mms_0g_run3	1	116	3.2642	0.371702
hexyl_10mms_0g_run3	1	117	3.26533	0.482103
hexyl_10mms_0g_run3	1	118	3.26647	0.416509
hexyl_10mms_0g_run3	1	119	3.2709	0.500656
hexyl_10mms_0g_run3	1	120	3.272	0.413178
hexyl_10mms_0g_run3	1	121	3.2731	0.456006
hexyl_10mms_0g_run3	1	122	3.2742	0.487373
hexyl_10mms_0g_run3	1	123	3.27531	0.362573
hexyl_10mms_0g_run3	1	124	3.27992	0.500362
hexyl_10mms_0g_run3	1	125	3.28105	0.381714
hexyl_10mms_0g_run3	1	126	3.28219	0.451461
hexyl_10mms_0g_run3	1	127	3.28332	0.466625
hexyl_10mms_0g_run3	1	128	3.28446	0.373818
hexyl_10mms_0g_run3	1	129	3.28893	0.4256
hexyl_10mms_0g_run3	1	130	3.29007	0.491546
hexyl_10mms_0g_run3	1	131	3.2912	0.410436
hexyl_10mms_0g_run3	1	132	3.29234	0.432065
hexyl_10mms_0g_run3	1	133	3.29347	0.462236
hexyl_10mms_0g_run3	1	134	3.29793	0.464392
hexyl_10mms_0g_run3	1	135	3.29906	0.481162
hexyl_10mms_0g_run3	1	136	3.3002	0.364493
hexyl_10mms_0g_run3	1	137	3.30133	0.51919
hexyl_10mms_0g_run3	1	138	3.30246	0.404029
hexyl_10mms_0g_run3	1	139	3.30693	0.522501
hexyl_10mms_0g_run3	1	140	3.30807	0.356401
hexyl_10mms_0g_run3	1	141	3.3092	0.502988
hexyl_10mms_0g_run3	1	142	3.31034	0.401129
hexyl_10mms_0g_run3	1	143	3.31147	0.4371
hexyl_10mms_0g_run3	1	144	3.31594	0.373642
hexyl_10mms_0g_run3	1	145	3.31707	0.486276
hexyl_10mms_0g_run3	1	146	3.31821	0.434455
hexyl_10mms_0g_run3	1	147	3.31934	0.385045
hexyl_10mms_0g_run3	1	148	3.32047	0.523814
hexyl_10mms_0g_run3	1	149	3.32493	0.417254
hexyl_10mms_0g_run3	1	150	3.32607	0.48845
hexyl_10mms_0g_run3	1	151	3.3272	0.378854
hexyl_10mms_0g_run3	1	152	3.32833	0.446661
hexyl_10mms_0g_run3	1	153	3.32947	0.426795
hexyl_10mms_0g_run3	1	154	3.33394	0.511001
hexyl_10mms_0g_run3	1	155	3.33507	0.370331
hexyl_10mms_0g_run3	1	156	3.3362	0.468036
hexyl_10mms_0g_run3	1	157	3.33733	0.476421
hexyl_10mms_0g_run3	1	158	3.33847	0.41598
hexyl_10mms_0g_run3	1	159	3.34293	0.420682
hexyl_10mms_0g_run3	1	160	3.34407	0.411298
hexyl_10mms_0g_run3	1	161	3.3452	0.477636
hexyl_10mms_0g_run3	1	162	3.34634	0.371781
hexyl_10mms_0g_run3	1	163	3.34747	0.475774
hexyl_10mms_0g_run3	1	164	3.35194	0.421642
hexyl_10mms_0g_run3	1	165	3.35307	0.481809
hexyl_10mms_0g_run3	1	166	3.35421	0.389061
hexyl_10mms_0g_run3	1	167	3.35534	0.501694
hexyl_10mms_0g_run3	1	168	3.35648	0.425423
hexyl_10mms_0g_run3	1	169	3.36094	0.454478
hexyl_10mms_0g_run3	1	170	3.36207	0.481652
hexyl_10mms_0g_run3	1	171	3.3632	0.343843
hexyl_10mms_0g_run3	1	172	3.36433	0.504712
hexyl_10mms_0g_run3	1	173	3.36547	0.396956
hexyl_10mms_0g_run3	1	174	3.36993	0.519092
hexyl_10mms_0g_run3	1	175	3.37107	0.37184
hexyl_10mms_0g_run3	1	176	3.3722	0.511706
hexyl_10mms_0g_run3	1	177	3.37334	0.425717
hexyl_10mms_0g_run3	1	178	3.37447	0.400385
hexyl_10mms_0g_run3	1	179	3.37894	0.368215
hexyl_10mms_0g_run3	1	180	3.38007	0.466899
hexyl_10mms_0g_run3	1	181	3.38121	0.43277
hexyl_10mms_0g_run3	1	182	3.38234	0.402638
hexyl_10mms_0g_run3	1	183	3.38348	0.476754
hexyl_10mms_0g_run3	1	184	3.38794	0.477655
hexyl_10mms_0g_run3	1	185	3.38908	0.474599
hexyl_10mms_0g_run3	1	186	3.39021	0.372036
hexyl_10mms_0g_run3	1	187	3.39134	0.514371
hexyl_10mms_0g_run3	1	188	3.39248	0.369293
hexyl_10mms_0g_run3	1	189	3.39694	0.481554
hexyl_10mms_0g_run3	1	190	3.39807	0.369391
hexyl_10mms_0g_run3	1	191	3.39921	0.472895
hexyl_10mms_0g_run3	1	192	3.40034	0.401482
hexyl_10mms_0g_run3	1	193	3.40148	0.43377
hexyl_10mms_0g_run3	1	194	3.40594	0.419957
hexyl_10mms_0g_run3	1	195	3.40707	0.414119
hexyl_10mms_0g_run3	1	196	3.4082	0.479987
hexyl_10mms_0g_run3	1	197	3.40934	0.411435
hexyl_10mms_0g_run3	1	198	3.41047	0.42993
hexyl_10mms_0g_run3	1	199	3.41491	0.447543
hexyl_10mms_0g_run3	1	200	3.41601	0.379265
hexyl_10mms_0g_run3	1	201	3.41711	0.478988
hexyl_10mms_0g_run3	1	202	3.41821	0.398877
hexyl_10mms_0g_run3	1	203	3.41931	0.491958
hexyl_10mms_0g_run3	1	204	3.42393	0.402168
hexyl_10mms_0g_run3	1	205	3.42506	0.488627
hexyl_10mms_0g_run3	1	206	3.42619	0.425659
hexyl_10mms_0g_run3	1	207	3.42733	0.424464
hexyl_10mms_0g_run3	1	208	3.42846	0.480849
hexyl_10mms_0g_run3	1	209	3.43294	0.465215
hexyl_10mms_0g_run3	1	210	3.43407	0.36175
hexyl_10mms_0g_run3	1	211	3.43521	0.503556
hexyl_10mms_0g_run3	1	212	3.43634	0.395801
hexyl_10mms_0g_run3	1	213	3.43747	0.419193
hexyl_10mms_0g_run3	1	214	3.44194	0.352934
hexyl_10mms_0g_run3	1	215	3.44307	0.449502
hexyl_10mms_0g_run3	1	216	3.4442	0.465469
hexyl_10mms_0g_run3	1	217	3.44533	0.385103
hexyl_10mms_0g_run3	1	218	3.44647	0.419135
hexyl_10mms_0g_run3	1	219	3.45094	0.426207
hexyl_10mms_0g_run3	1	220	3.45207	0.481417
hexyl_10mms_0g_run3	1	221	3.4532	0.37805
hexyl_10mms_0g_run3	1	222	3.45434	0.513665
hexyl_10mms_0g_run3	1	223	3.45547	0.431556
hexyl_10mms_0g_run3	1	224	3.45994	0.485238
hexyl_10mms_0g_run3	1	225	3.46108	0.354736
hexyl_10mms_0g_run3	1	226	3.46221	0.481515
hexyl_10mms_0g_run3	1	227	3.46334	0.397446
hexyl_10mms_0g_run3	1	228	3.46448	0.431242
hexyl_10mms_0g_run3	1	229	3.46894	0.397466
hexyl_10mms_0g_run3	1	230	3.47008	0.452127
hexyl_10mms_0g_run3	1	231	3.47121	0.466488
hexyl_10mms_0g_run3	1	232	3.47235	0.412003
hexyl_10mms_0g_run3	1	233	3.47348	0.504751
hexyl_10mms_0g_run3	1	234	3.47794	0.395135
hexyl_10mms_0g_run3	1	235	3.47907	0.467448
hexyl_10mms_0g_run3	1	236	3.48021	0.391471
hexyl_10mms_0g_run3	1	237	3.48134	0.448326
hexyl_10mms_0g_run3	1	238	3.48247	0.495504
hexyl_10mms_0g_run3	1	239	3.48694	0.459846
hexyl_10mms_0g_run3	1	240	3.48807	0.468761
hexyl_10mms_0g_run3	1	241	3.4892	0.372682
hexyl_10mms_0g_run3	1	242	3.49034	0.515193
hexyl_10mms_0g_run3	1	243	3.49147	0.362847
hexyl_10mms_0g_run3	1	244	3.49594	0.411905
hexyl_10mms_0g_run3	1	245	3.49708	0.337162
hexyl_10mms_0g_run3	1	246	3.49821	0.414981
hexyl_10mms_0g_run3	1	247	3.49935	0.298312
hexyl_10mms_0g_run3	1	248	3.50048	0.352875
hexyl_10mms_0g_run3	1	249	3.50494	0.25852
hexyl_10mms_0g_run3	1	250	3.50607	0.375915
hexyl_10mms_0g_run3	1	251	3.50721	0.329149
hexyl_10mms_0g_run3	1	252	3.50834	0.276349
hexyl_10mms_0g_run3	1	253	3.50948	0.397015
hexyl_10mms_0g_run3	1	254	3.51394	0.330873
hexyl_10mms_0g_run3	1	255	3.51507	0.368196
hexyl_10mms_0g_run3	1	256	3.51621	0.283892
hexyl_10mms_0g_run3	1	257	3.51734	0.350974
hexyl_10mms_0g_run3	1	258	3.51847	0.35501
hexyl_10mms_0g_run3	1	259	3.52295	0.353306
hexyl_10mms_0g_run3	1	260	3.52408	0.262341
hexyl_10mms_0g_run3	1	261	3.52521	0.387631
hexyl_10mms_0g_run3	1	262	3.52634	0.3123
hexyl_10mms_0g_run3	1	263	3.52747	0.274567
hexyl_10mms_0g_run3	1	264	3.53194	0.257993
hexyl_10mms_0g_run3	1	265	3.53308	0.324879
hexyl_10mms_0g_run3	1	266	3.53421	0.367649
hexyl_10mms_0g_run3	1	267	3.53534	0.287537
hexyl_10mms_0g_run3	1	268	3.53647	0.301643
hexyl_10mms_0g_run3	2	1	4.30711	0.20864
hexyl_10mms_0g_run3	2	2	4.30824	0.293806
hexyl_10mms_0g_run3	2	3	4.30938	0.278779
hexyl_10mms_0g_run3	2	4	4.31051	0.187932
hexyl_10mms_0g_run3	2	5	4.31498	0.199785
hexyl_10mms_0g_run3	2	6	4.31611	0.251938
hexyl_10mms_0g_run3	2	7	4.31724	0.306188
hexyl_10mms_0g_run3	2	8	4.31838	0.183445
hexyl_10mms_0g_run3	2	9	4.31951	0.339593
hexyl_10mms_0g_run3	2	10	4.32398	0.27443
hexyl_10mms_0g_run3	2	11	4.32512	0.291122
hexyl_10mms_0g_run3	2	12	4.32625	0.196474
hexyl_10mms_0g_run3	2	13	4.32739	0.316552
hexyl_10mms_0g_run3	2	14	4.32852	0.202567
hexyl_10mms_0g_run3	2	15	4.33298	0.336556
hexyl_10mms_0g_run3	2	16	4.33412	0.178038
hexyl_10mms_0g_run3	2	17	4.33525	0.300546
hexyl_10mms_0g_run3	2	18	4.33638	0.263674
hexyl_10mms_0g_run3	2	19	4.33751	0.241026
hexyl_10mms_0g_run3	2	20	4.34198	0.212441
hexyl_10mms_0g_run3	2	21	4.34311	0.228996
hexyl_10mms_0g_run3	2	22	4.34424	0.295628
hexyl_10mms_0g_run3	2	23	4.34538	0.228193
hexyl_10mms_0g_run3	2	24	4.34651	0.198629
hexyl_10mms_0g_run3	2	25	4.35098	0.227801
hexyl_10mms_0g_run3	2	26	4.35211	0.297
hexyl_10mms_0g_run3	2	27	4.35325	0.21585
hexyl_10mms_0g_run3	2	28	4.35438	0.312517
hexyl_10mms_0g_run3	2	29	4.35551	0.318139
hexyl_10mms_0g_run3	2	30	4.35998	0.335067
hexyl_10mms_0g_run3	2	31	4.36112	0.238537
hexyl_10mms_0g_run3	2	32	4.36225	0.271158
hexyl_10mms_0g_run3	2	33	4.36339	0.305679
hexyl_10mms_0g_run3	2	34	4.36452	0.285911
hexyl_10mms_0g_run3	2	35	4.36898	0.447329
hexyl_10mms_0g_run3	2	36	4.37012	0.389023
hexyl_10mms_0g_run3	2	37	4.37125	0.52983
hexyl_10mms_0g_run3	2	38	4.37238	0.488432
hexyl_10mms_0g_run3	2	39	4.37351	0.425581
hexyl_10mms_0g_run3	2	40	4.37798	0.462258
hexyl_10mms_0g_run3	2	41	4.37912	0.533337
hexyl_10mms_0g_run3	2	42	4.38025	0.525344
hexyl_10mms_0g_run3	2	43	4.38139	0.497915
hexyl_10mms_0g_run3	2	44	4.38252	0.611156
hexyl_10mms_0g_run3	2	45	4.38699	0.623048
hexyl_10mms_0g_run3	2	46	4.38812	0.655708
hexyl_10mms_0g_run3	2	47	4.38925	0.557513
hexyl_10mms_0g_run3	2	48	4.39039	0.681158
hexyl_10mms_0g_run3	2	49	4.39152	0.545681
hexyl_10mms_0g_run3	2	50	4.39598	0.569132
hexyl_10mms_0g_run3	2	51	4.39711	0.422114
hexyl_10mms_0g_run3	2	52	4.39825	0.529361
hexyl_10mms_0g_run3	2	53	4.39938	0.486062
hexyl_10mms_0g_run3	2	54	4.40052	0.415629
hexyl_10mms_0g_run3	2	55	4.40499	0.408439
hexyl_10mms_0g_run3	2	56	4.40612	0.464727
hexyl_10mms_0g_run3	2	57	4.40725	0.502441
hexyl_10mms_0g_run3	2	58	4.40838	0.401308
hexyl_10mms_0g_run3	2	59	4.40952	0.511767
hexyl_10mms_0g_run3	2	60	4.41398	0.417569
hexyl_10mms_0g_run3	2	61	4.41512	0.499424
hexyl_10mms_0g_run3	2	62	4.41625	0.421096
hexyl_10mms_0g_run3	2	63	4.41739	0.472172
hexyl_10mms_0g_run3	2	64	4.41852	0.458967
hexyl_10mms_0g_run3	2	65	4.42295	0.51449
hexyl_10mms_0g_run3	2	66	4.42405	0.382676
hexyl_10mms_0g_run3	2	67	4.42516	0.466666
hexyl_10mms_0g_run3	2	68	4.42626	0.492743
hexyl_10mms_0g_run3	2	69	4.42737	0.372625
hexyl_10mms_0g_run3	2	70	4.43197	0.504596
hexyl_10mms_0g_run3	2	71	4.4331	0.442607
hexyl_10mms_0g_run3	2	72	4.43424	0.450758
hexyl_10mms_0g_run3	2	73	4.43537	0.492567
hexyl_10mms_0g_run3	2	74	4.43651	0.395528
hexyl_10mms_0g_run3	2	75	4.44099	0.38197
hexyl_10mms_0g_run3	2	76	4.44212	0.483241
hexyl_10mms_0g_run3	2	77	4.44325	0.453128
hexyl_10mms_0g_run3	2	78	4.44438	0.371508
hexyl_10mms_0g_run3	2	79	4.44552	0.520701
hexyl_10mms_0g_run3	2	80	4.44998	0.437102
hexyl_10mms_0g_run3	2	81	4.45112	0.491724
hexyl_10mms_0g_run3	2	82	4.45225	0.371822
hexyl_10mms_0g_run3	2	83	4.45339	0.518507
hexyl_10mms_0g_run3	2	84	4.45452	0.405167
hexyl_10mms_0g_run3	2	85	4.45898	0.516645
hexyl_10mms_0g_run3	2	86	4.46012	0.366571
hexyl_10mms_0g_run3	2	87	4.46125	0.493037
hexyl_10mms_0g_run3	2	88	4.46239	0.429442
hexyl_10mms_0g_run3	2	89	4.46352	0.384145
hexyl_10mms_0g_run3	2	90	4.46799	0.368667
hexyl_10mms_0g_run3	2	91	4.46912	0.475659
hexyl_10mms_0g_run3	2	92	4.47026	0.457145
hexyl_10mms_0g_run3	2	93	4.47139	0.405402
hexyl_10mms_0g_run3	2	94	4.47253	0.517135
hexyl_10mms_0g_run3	2	95	4.47699	0.408635
hexyl_10mms_0g_run3	2	96	4.47812	0.474542
hexyl_10mms_0g_run3	2	97	4.47925	0.397095
hexyl_10mms_0g_run3	2	98	4.48039	0.40646
hexyl_10mms_0g_run3	2	99	4.48152	0.461945
hexyl_10mms_0g_run3	2	100	4.48599	0.485631
hexyl_10mms_0g_run3	2	101	4.48712	0.419215
hexyl_10mms_0g_run3	2	102	4.48825	0.426934
hexyl_10mms_0g_run3	2	103	4.48939	0.465569
hexyl_10mms_0g_run3	2	104	4.49052	0.39782
hexyl_10mms_0g_run3	2	105	4.49499	0.471035
hexyl_10mms_0g_run3	2	106	4.49612	0.355051
hexyl_10mms_0g_run3	2	107	4.49725	0.473602
hexyl_10mms_0g_run3	2	108	4.49839	0.414709
hexyl_10mms_0g_run3	2	109	4.49952	0.392178
hexyl_10mms_0g_run3	2	110	4.50399	0.393608
hexyl_10mms_0g_run3	2	111	4.50512	0.489824
hexyl_10mms_0g_run3	2	112	4.50625	0.453951
hexyl_10mms_0g_run3	2	113	4.50739	0.380501
hexyl_10mms_0g_run3	2	114	4.50852	0.515274
hexyl_10mms_0g_run3	2	115	4.51299	0.414924
hexyl_10mms_0g_run3	2	116	4.51412	0.496564
hexyl_10mms_0g_run3	2	117	4.51525	0.352974
hexyl_10mms_0g_run3	2	118	4.51639	0.520623
hexyl_10mms_0g_run3	2	119	4.51752	0.380325
hexyl_10mms_0g_run3	2	120	4.52199	0.526794
hexyl_10mms_0g_run3	2	121	4.52312	0.380912
hexyl_10mms_0g_run3	2	122	4.52425	0.4862
hexyl_10mms_0g_run3	2	123	4.52539	0.431714
[truncated: 32,813 more rows]

## Sheet: C8
VariableName	CellIndex	RowIndex	Time (s)	Force (N)
octyl_10mms_0g_run1	1	1	2.83015	0.425147
octyl_10mms_0g_run1	1	2	2.83462	0.431887
octyl_10mms_0g_run1	1	3	2.83575	0.421621
octyl_10mms_0g_run1	1	4	2.83688	0.414352
octyl_10mms_0g_run1	1	5	2.83801	0.420857
octyl_10mms_0g_run1	1	6	2.83915	0.419681
octyl_10mms_0g_run1	1	7	2.84358	0.416429
octyl_10mms_0g_run1	1	8	2.84468	0.418114
octyl_10mms_0g_run1	1	9	2.84578	0.422874
octyl_10mms_0g_run1	1	10	2.84689	0.423168
octyl_10mms_0g_run1	1	11	2.84799	0.419152
octyl_10mms_0g_run1	1	12	2.8526	0.419799
octyl_10mms_0g_run1	1	13	2.85374	0.419034
octyl_10mms_0g_run1	1	14	2.85487	0.420386
octyl_10mms_0g_run1	1	15	2.856	0.417918
octyl_10mms_0g_run1	1	16	2.85714	0.415998
octyl_10mms_0g_run1	1	17	2.86162	0.435119
octyl_10mms_0g_run1	1	18	2.86275	0.449852
octyl_10mms_0g_run1	1	19	2.86389	0.458042
octyl_10mms_0g_run1	1	20	2.86502	0.475792
octyl_10mms_0g_run1	1	21	2.86615	0.518247
octyl_10mms_0g_run1	1	22	2.87062	0.63184
octyl_10mms_0g_run1	1	23	2.87175	0.658368
octyl_10mms_0g_run1	1	24	2.87288	0.69426
octyl_10mms_0g_run1	1	25	2.87402	0.721453
octyl_10mms_0g_run1	1	26	2.87515	0.723824
octyl_10mms_0g_run1	1	27	2.87961	0.790769
octyl_10mms_0g_run1	1	28	2.88075	0.796098
octyl_10mms_0g_run1	1	29	2.88189	0.818393
octyl_10mms_0g_run1	1	30	2.88302	0.829639
octyl_10mms_0g_run1	1	31	2.88415	0.846037
octyl_10mms_0g_run1	1	32	2.88862	0.8814
octyl_10mms_0g_run1	1	33	2.88975	0.902344
octyl_10mms_0g_run1	1	34	2.89089	0.866785
octyl_10mms_0g_run1	1	35	2.89203	0.891588
octyl_10mms_0g_run1	1	36	2.89317	0.901051
octyl_10mms_0g_run1	1	37	2.89761	0.911513
octyl_10mms_0g_run1	1	38	2.89875	0.906125
octyl_10mms_0g_run1	1	39	2.89988	0.910847
octyl_10mms_0g_run1	1	40	2.90102	0.886729
octyl_10mms_0g_run1	1	41	2.90216	0.903539
octyl_10mms_0g_run1	1	42	2.90662	0.900404
octyl_10mms_0g_run1	1	43	2.90775	0.874876
octyl_10mms_0g_run1	1	44	2.90888	0.887258
octyl_10mms_0g_run1	1	45	2.91002	0.891451
octyl_10mms_0g_run1	1	46	2.91116	0.882615
octyl_10mms_0g_run1	1	47	2.91562	0.884339
octyl_10mms_0g_run1	1	48	2.91675	0.900032
octyl_10mms_0g_run1	1	49	2.91788	0.892058
octyl_10mms_0g_run1	1	50	2.91902	0.879343
octyl_10mms_0g_run1	1	51	2.92015	0.875973
octyl_10mms_0g_run1	1	52	2.92462	0.868156
octyl_10mms_0g_run1	1	53	2.92575	0.880891
octyl_10mms_0g_run1	1	54	2.92689	0.878814
octyl_10mms_0g_run1	1	55	2.92802	0.879931
octyl_10mms_0g_run1	1	56	2.92916	0.888551
octyl_10mms_0g_run1	1	57	2.93361	0.906478
octyl_10mms_0g_run1	1	58	2.93475	0.893312
octyl_10mms_0g_run1	1	59	2.93588	0.879637
octyl_10mms_0g_run1	1	60	2.93702	0.877169
octyl_10mms_0g_run1	1	61	2.93815	0.889394
octyl_10mms_0g_run1	1	62	2.94262	0.90013
octyl_10mms_0g_run1	1	63	2.94375	0.867059
octyl_10mms_0g_run1	1	64	2.94489	0.887415
octyl_10mms_0g_run1	1	65	2.94602	0.889355
octyl_10mms_0g_run1	1	66	2.94715	0.884829
octyl_10mms_0g_run1	1	67	2.95162	0.885025
octyl_10mms_0g_run1	1	68	2.95275	0.882968
octyl_10mms_0g_run1	1	69	2.95389	0.891275
octyl_10mms_0g_run1	1	70	2.95502	0.878324
octyl_10mms_0g_run1	1	71	2.95615	0.880442
octyl_10mms_0g_run1	1	72	2.96062	0.878718
octyl_10mms_0g_run1	1	73	2.96175	0.892197
octyl_10mms_0g_run1	1	74	2.96289	0.882029
octyl_10mms_0g_run1	1	75	2.96403	0.885928
octyl_10mms_0g_run1	1	76	2.96516	0.885712
octyl_10mms_0g_run1	1	77	2.96962	0.887221
octyl_10mms_0g_run1	1	78	2.97075	0.885477
octyl_10mms_0g_run1	1	79	2.97189	0.881422
octyl_10mms_0g_run1	1	80	2.97302	0.884752
octyl_10mms_0g_run1	1	81	2.97416	0.858401
octyl_10mms_0g_run1	1	82	2.97862	0.892726
octyl_10mms_0g_run1	1	83	2.97975	0.882009
octyl_10mms_0g_run1	1	84	2.98089	0.888671
octyl_10mms_0g_run1	1	85	2.98202	0.892942
octyl_10mms_0g_run1	1	86	2.98315	0.899446
octyl_10mms_0g_run1	1	87	2.98759	0.880775
octyl_10mms_0g_run1	1	88	2.98869	0.881951
octyl_10mms_0g_run1	1	89	2.9898	0.889826
octyl_10mms_0g_run1	1	90	2.9909	0.844178
octyl_10mms_0g_run1	1	91	2.992	0.86712
octyl_10mms_0g_run1	1	92	2.99661	0.884458
octyl_10mms_0g_run1	1	93	2.99774	0.886868
octyl_10mms_0g_run1	1	94	2.99888	0.881167
octyl_10mms_0g_run1	1	95	3.00002	0.895665
octyl_10mms_0g_run1	1	96	3.00115	0.87096
octyl_10mms_0g_run1	1	97	3.00562	0.88438
octyl_10mms_0g_run1	1	98	3.00676	0.88199
octyl_10mms_0g_run1	1	99	3.00789	0.865513
octyl_10mms_0g_run1	1	100	3.00903	0.873585
octyl_10mms_0g_run1	1	101	3.01016	0.890865
octyl_10mms_0g_run1	1	102	3.01462	0.883694
octyl_10mms_0g_run1	1	103	3.01575	0.89014
octyl_10mms_0g_run1	1	104	3.01689	0.899485
octyl_10mms_0g_run1	1	105	3.01802	0.898486
octyl_10mms_0g_run1	1	106	3.01916	0.88152
octyl_10mms_0g_run1	1	107	3.02362	0.877797
octyl_10mms_0g_run1	1	108	3.02475	0.868393
octyl_10mms_0g_run1	1	109	3.02588	0.885046
octyl_10mms_0g_run1	1	110	3.02702	0.875426
octyl_10mms_0g_run1	1	111	3.02816	0.882636
octyl_10mms_0g_run1	1	112	3.03263	0.916177
octyl_10mms_0g_run1	1	113	3.03376	0.904109
octyl_10mms_0g_run1	1	114	3.0349	0.897056
octyl_10mms_0g_run1	1	115	3.03603	0.878698
octyl_10mms_0g_run1	1	116	3.03716	0.888259
octyl_10mms_0g_run1	1	117	3.04162	0.875152
octyl_10mms_0g_run1	1	118	3.04276	0.903737
octyl_10mms_0g_run1	1	119	3.04389	0.879776
octyl_10mms_0g_run1	1	120	3.04503	0.888396
octyl_10mms_0g_run1	1	121	3.04616	0.892726
octyl_10mms_0g_run1	1	122	3.05062	0.900328
octyl_10mms_0g_run1	1	123	3.05176	0.888455
octyl_10mms_0g_run1	1	124	3.05289	0.879835
octyl_10mms_0g_run1	1	125	3.05402	0.885849
octyl_10mms_0g_run1	1	126	3.05516	0.877092
octyl_10mms_0g_run1	1	127	3.05962	0.875622
octyl_10mms_0g_run1	1	128	3.06076	0.878875
octyl_10mms_0g_run1	1	129	3.06189	0.891374
octyl_10mms_0g_run1	1	130	3.06303	0.883302
octyl_10mms_0g_run1	1	131	3.06416	0.881853
octyl_10mms_0g_run1	1	132	3.06863	0.888886
octyl_10mms_0g_run1	1	133	3.06976	0.883361
octyl_10mms_0g_run1	1	134	3.07089	0.884243
octyl_10mms_0g_run1	1	135	3.07203	0.879051
octyl_10mms_0g_run1	1	136	3.07316	0.88724
octyl_10mms_0g_run1	1	137	3.07762	0.883557
octyl_10mms_0g_run1	1	138	3.07875	0.8748
octyl_10mms_0g_run1	1	139	3.07989	0.882891
octyl_10mms_0g_run1	1	140	3.08102	0.887338
octyl_10mms_0g_run1	1	141	3.08215	0.896899
octyl_10mms_0g_run1	1	142	3.08662	0.882656
octyl_10mms_0g_run1	1	143	3.08775	0.881304
octyl_10mms_0g_run1	1	144	3.08889	0.886104
octyl_10mms_0g_run1	1	145	3.09003	0.892746
octyl_10mms_0g_run1	1	146	3.09116	0.865023
octyl_10mms_0g_run1	1	147	3.09563	0.881128
octyl_10mms_0g_run1	1	148	3.09676	0.883753
octyl_10mms_0g_run1	1	149	3.09789	0.892295
octyl_10mms_0g_run1	1	150	3.09903	0.886633
octyl_10mms_0g_run1	1	151	3.10016	0.902152
octyl_10mms_0g_run1	1	152	3.10463	0.881267
octyl_10mms_0g_run1	1	153	3.10577	0.890671
octyl_10mms_0g_run1	1	154	3.1069	0.882501
octyl_10mms_0g_run1	1	155	3.10803	0.869669
octyl_10mms_0g_run1	1	156	3.10917	0.8768
octyl_10mms_0g_run1	1	157	3.11363	0.8912
octyl_10mms_0g_run1	1	158	3.11476	0.889809
octyl_10mms_0g_run1	1	159	3.1159	0.923213
octyl_10mms_0g_run1	1	160	3.11703	0.902681
octyl_10mms_0g_run1	1	161	3.11816	0.902642
octyl_10mms_0g_run1	1	162	3.12263	0.891631
octyl_10mms_0g_run1	1	163	3.12376	0.883696
octyl_10mms_0g_run1	1	164	3.1249	0.873802
octyl_10mms_0g_run1	1	165	3.12603	0.905757
octyl_10mms_0g_run1	1	166	3.12717	0.87294
octyl_10mms_0g_run1	1	167	3.13159	0.882305
octyl_10mms_0g_run1	1	168	3.13269	0.912242
octyl_10mms_0g_run1	1	169	3.1338	0.900369
octyl_10mms_0g_run1	1	170	3.1349	0.894864
octyl_10mms_0g_run1	1	171	3.13601	0.881757
octyl_10mms_0g_run1	1	172	3.14061	0.884304
octyl_10mms_0g_run1	1	173	3.14175	0.871373
octyl_10mms_0g_run1	1	174	3.14288	0.890691
octyl_10mms_0g_run1	1	175	3.14402	0.874821
octyl_10mms_0g_run1	1	176	3.14516	0.888594
octyl_10mms_0g_run1	1	177	3.14963	0.906364
octyl_10mms_0g_run1	1	178	3.15076	0.889143
octyl_10mms_0g_run1	1	179	3.1519	0.87966
octyl_10mms_0g_run1	1	180	3.15303	0.879464
octyl_10mms_0g_run1	1	181	3.15417	0.883931
octyl_10mms_0g_run1	1	182	3.15863	0.872823
octyl_10mms_0g_run1	1	183	3.15976	0.870452
octyl_10mms_0g_run1	1	184	3.1609	0.883755
octyl_10mms_0g_run1	1	185	3.16203	0.895882
octyl_10mms_0g_run1	1	186	3.16317	0.884715
octyl_10mms_0g_run1	1	187	3.16763	0.882991
octyl_10mms_0g_run1	1	188	3.16876	0.88738
octyl_10mms_0g_run1	1	189	3.16989	0.884637
octyl_10mms_0g_run1	1	190	3.17103	0.878054
octyl_10mms_0g_run1	1	191	3.17216	0.883344
octyl_10mms_0g_run1	1	192	3.17663	0.874096
octyl_10mms_0g_run1	1	193	3.17777	0.885695
octyl_10mms_0g_run1	1	194	3.1789	0.876369
octyl_10mms_0g_run1	1	195	3.18004	0.886616
octyl_10mms_0g_run1	1	196	3.18118	0.884186
octyl_10mms_0g_run1	1	197	3.18563	0.889084
octyl_10mms_0g_run1	1	198	3.18676	0.877153
octyl_10mms_0g_run1	1	199	3.1879	0.880581
octyl_10mms_0g_run1	1	200	3.18904	0.880307
octyl_10mms_0g_run1	1	201	3.19017	0.883775
octyl_10mms_0g_run1	1	202	3.19463	0.885087
octyl_10mms_0g_run1	1	203	3.19576	0.882442
octyl_10mms_0g_run1	1	204	3.19689	0.88977
octyl_10mms_0g_run1	1	205	3.19803	0.888359
octyl_10mms_0g_run1	1	206	3.19916	0.901329
octyl_10mms_0g_run1	1	207	3.20363	0.875938
octyl_10mms_0g_run1	1	208	3.20476	0.884069
octyl_10mms_0g_run1	1	209	3.2059	0.885029
octyl_10mms_0g_run1	1	210	3.20703	0.879151
octyl_10mms_0g_run1	1	211	3.20817	0.866984
octyl_10mms_0g_run1	1	212	3.21263	0.885636
octyl_10mms_0g_run1	1	213	3.21377	0.883383
octyl_10mms_0g_run1	1	214	3.2149	0.882266
octyl_10mms_0g_run1	1	215	3.21604	0.904953
octyl_10mms_0g_run1	1	216	3.21717	0.898253
octyl_10mms_0g_run1	1	217	3.22163	0.884264
octyl_10mms_0g_run1	1	218	3.22277	0.882462
octyl_10mms_0g_run1	1	219	3.2239	0.880366
octyl_10mms_0g_run1	1	220	3.22503	0.868846
octyl_10mms_0g_run1	1	221	3.22617	0.903876
octyl_10mms_0g_run1	1	222	3.23063	0.887419
octyl_10mms_0g_run1	1	223	3.23177	0.884833
octyl_10mms_0g_run1	1	224	3.2329	0.902798
octyl_10mms_0g_run1	1	225	3.23403	0.905051
octyl_10mms_0g_run1	1	226	3.23517	0.891357
octyl_10mms_0g_run1	1	227	3.23963	0.880601
octyl_10mms_0g_run1	1	228	3.24077	0.878544
octyl_10mms_0g_run1	1	229	3.2419	0.874586
octyl_10mms_0g_run1	1	230	3.24304	0.88015
octyl_10mms_0g_run1	1	231	3.24417	0.881895
octyl_10mms_0g_run1	1	232	3.24863	0.890476
octyl_10mms_0g_run1	1	233	3.24977	0.905601
octyl_10mms_0g_run1	1	234	3.2509	0.898783
octyl_10mms_0g_run1	1	235	3.25204	0.89026
octyl_10mms_0g_run1	1	236	3.25317	0.880562
octyl_10mms_0g_run1	1	237	3.25763	0.8509
octyl_10mms_0g_run1	1	238	3.25877	0.871707
octyl_10mms_0g_run1	1	239	3.25991	0.872471
octyl_10mms_0g_run1	1	240	3.26104	0.870884
octyl_10mms_0g_run1	1	241	3.26218	0.86097
octyl_10mms_0g_run1	1	242	3.26663	0.81973
octyl_10mms_0g_run1	1	243	3.26777	0.764285
octyl_10mms_0g_run1	1	244	3.2689	0.762012
octyl_10mms_0g_run1	1	245	3.27003	0.73523
octyl_10mms_0g_run1	1	246	3.27117	0.731527
octyl_10mms_0g_run1	1	247	3.2756	0.695243
octyl_10mms_0g_run1	1	248	3.2767	0.69873
octyl_10mms_0g_run1	1	249	3.27781	0.70016
octyl_10mms_0g_run1	1	250	3.27891	0.694988
octyl_10mms_0g_run1	1	251	3.28001	0.708605
octyl_10mms_0g_run1	1	252	3.28462	0.706234
octyl_10mms_0g_run1	1	253	3.28576	0.698613
octyl_10mms_0g_run1	1	254	3.28689	0.686955
octyl_10mms_0g_run1	1	255	3.28802	0.686583
octyl_10mms_0g_run1	1	256	3.28916	0.677649
octyl_10mms_0g_run1	1	257	3.29363	0.662818
octyl_10mms_0g_run1	1	258	3.29477	0.665071
octyl_10mms_0g_run1	1	259	3.2959	0.667246
octyl_10mms_0g_run1	1	260	3.29704	0.666678
octyl_10mms_0g_run1	1	261	3.29817	0.670557
octyl_10mms_0g_run1	1	262	3.30264	0.65988
octyl_10mms_0g_run1	1	263	3.30377	0.651945
octyl_10mms_0g_run1	1	264	3.3049	0.654022
octyl_10mms_0g_run1	1	265	3.30604	0.654472
octyl_10mms_0g_run1	1	266	3.30717	0.647889
octyl_10mms_0g_run1	1	267	3.31163	0.64689
octyl_10mms_0g_run1	1	268	3.31276	0.64354
octyl_10mms_0g_run1	2	1	3.95179	0.469425
octyl_10mms_0g_run1	2	2	3.95293	0.457376
octyl_10mms_0g_run1	2	3	3.95406	0.459511
octyl_10mms_0g_run1	2	4	3.9552	0.459433
octyl_10mms_0g_run1	2	5	3.95967	0.47207
octyl_10mms_0g_run1	2	6	3.9608	0.456534
octyl_10mms_0g_run1	2	7	3.96193	0.459962
octyl_10mms_0g_run1	2	8	3.96307	0.460981
octyl_10mms_0g_run1	2	9	3.9642	0.459295
octyl_10mms_0g_run1	2	10	3.96867	0.461803
octyl_10mms_0g_run1	2	11	3.9698	0.452144
octyl_10mms_0g_run1	2	12	3.97093	0.457708
octyl_10mms_0g_run1	2	13	3.97207	0.455671
octyl_10mms_0g_run1	2	14	3.9732	0.457649
octyl_10mms_0g_run1	2	15	3.97767	0.473382
octyl_10mms_0g_run1	2	16	3.9788	0.497734
octyl_10mms_0g_run1	2	17	3.97993	0.50275
octyl_10mms_0g_run1	2	18	3.98107	0.516072
octyl_10mms_0g_run1	2	19	3.9822	0.551494
octyl_10mms_0g_run1	2	20	3.98667	0.671474
octyl_10mms_0g_run1	2	21	3.9878	0.703154
octyl_10mms_0g_run1	2	22	3.98894	0.73595
octyl_10mms_0g_run1	2	23	3.99007	0.765828
octyl_10mms_0g_run1	2	24	3.99121	0.755444
octyl_10mms_0g_run1	2	25	3.99563	0.819078
octyl_10mms_0g_run1	2	26	3.99674	0.830735
octyl_10mms_0g_run1	2	27	3.99784	0.84729
octyl_10mms_0g_run1	2	28	3.99894	0.850582
octyl_10mms_0g_run1	2	29	4.00005	0.87707
octyl_10mms_0g_run1	2	30	4.00465	0.893253
octyl_10mms_0g_run1	2	31	4.00579	0.901324
octyl_10mms_0g_run1	2	32	4.00692	0.894271
octyl_10mms_0g_run1	2	33	4.00806	0.884769
octyl_10mms_0g_run1	2	34	4.00919	0.889256
octyl_10mms_0g_run1	2	35	4.01367	0.90056
octyl_10mms_0g_run1	2	36	4.0148	0.901638
octyl_10mms_0g_run1	2	37	4.01594	0.912727
octyl_10mms_0g_run1	2	38	4.01707	0.925716
octyl_10mms_0g_run1	2	39	4.01821	0.925697
octyl_10mms_0g_run1	2	40	4.02267	0.930144
octyl_10mms_0g_run1	2	41	4.0238	0.927009
octyl_10mms_0g_run1	2	42	4.02494	0.914882
octyl_10mms_0g_run1	2	43	4.02607	0.939078
octyl_10mms_0g_run1	2	44	4.02721	0.91641
octyl_10mms_0g_run1	2	45	4.03167	0.932613
octyl_10mms_0g_run1	2	46	4.0328	0.963019
octyl_10mms_0g_run1	2	47	4.03393	0.952557
octyl_10mms_0g_run1	2	48	4.03507	0.937922
octyl_10mms_0g_run1	2	49	4.0362	0.927048
octyl_10mms_0g_run1	2	50	4.04067	0.922895
octyl_10mms_0g_run1	2	51	4.0418	0.917213
octyl_10mms_0g_run1	2	52	4.04294	0.932279
octyl_10mms_0g_run1	2	53	4.04408	0.916508
octyl_10mms_0g_run1	2	54	4.04521	0.927813
octyl_10mms_0g_run1	2	55	4.04967	0.944172
octyl_10mms_0g_run1	2	56	4.0508	0.934493
octyl_10mms_0g_run1	2	57	4.05193	0.925383
octyl_10mms_0g_run1	2	58	4.05307	0.92072
octyl_10mms_0g_run1	2	59	4.0542	0.923424
octyl_10mms_0g_run1	2	60	4.05867	0.898229
octyl_10mms_0g_run1	2	61	4.0598	0.904871
octyl_10mms_0g_run1	2	62	4.06094	0.906164
octyl_10mms_0g_run1	2	63	4.06207	0.918663
octyl_10mms_0g_run1	2	64	4.0632	0.906693
octyl_10mms_0g_run1	2	65	4.06767	0.91594
octyl_10mms_0g_run1	2	66	4.0688	0.91498
octyl_10mms_0g_run1	2	67	4.06994	0.913942
octyl_10mms_0g_run1	2	68	4.07107	0.901422
octyl_10mms_0g_run1	2	69	4.07221	0.907378
octyl_10mms_0g_run1	2	70	4.07667	0.8929
octyl_10mms_0g_run1	2	71	4.0778	0.915313
octyl_10mms_0g_run1	2	72	4.07894	0.887532
octyl_10mms_0g_run1	2	73	4.08007	0.905164
octyl_10mms_0g_run1	2	74	4.08121	0.907515
octyl_10mms_0g_run1	2	75	4.08567	0.915411
octyl_10mms_0g_run1	2	76	4.08681	0.897582
octyl_10mms_0g_run1	2	77	4.08794	0.902108
octyl_10mms_0g_run1	2	78	4.08907	0.905654
octyl_10mms_0g_run1	2	79	4.09021	0.902735
octyl_10mms_0g_run1	2	80	4.09467	0.900502
octyl_10mms_0g_run1	2	81	4.0958	0.901795
octyl_10mms_0g_run1	2	82	4.09694	0.908005
octyl_10mms_0g_run1	2	83	4.09807	0.903813
octyl_10mms_0g_run1	2	84	4.0992	0.897484
octyl_10mms_0g_run1	2	85	4.10367	0.891117
octyl_10mms_0g_run1	2	86	4.10481	0.901755
octyl_10mms_0g_run1	2	87	4.10594	0.904655
octyl_10mms_0g_run1	2	88	4.10708	0.898817
octyl_10mms_0g_run1	2	89	4.10821	0.886669
octyl_10mms_0g_run1	2	90	4.11268	0.905379
octyl_10mms_0g_run1	2	91	4.11381	0.903087
octyl_10mms_0g_run1	2	92	4.11494	0.896328
octyl_10mms_0g_run1	2	93	4.11608	0.936079
octyl_10mms_0g_run1	2	94	4.11721	0.913196
octyl_10mms_0g_run1	2	95	4.12167	0.903381
octyl_10mms_0g_run1	2	96	4.12281	0.889236
octyl_10mms_0g_run1	2	97	4.12394	0.893957
octyl_10mms_0g_run1	2	98	4.12507	0.889627
octyl_10mms_0g_run1	2	99	4.12621	0.919583
octyl_10mms_0g_run1	2	100	4.13067	0.900481
octyl_10mms_0g_run1	2	101	4.1318	0.897503
octyl_10mms_0g_run1	2	102	4.13294	0.920994
octyl_10mms_0g_run1	2	103	4.13408	0.917252
octyl_10mms_0g_run1	2	104	4.13521	0.902401
octyl_10mms_0g_run1	2	105	4.13964	0.891959
octyl_10mms_0g_run1	2	106	4.14074	0.894819
octyl_10mms_0g_run1	2	107	4.14185	0.89141
octyl_10mms_0g_run1	2	108	4.14295	0.90965
octyl_10mms_0g_run1	2	109	4.14406	0.893174
octyl_10mms_0g_run1	2	110	4.14866	0.89956
octyl_10mms_0g_run1	2	111	4.14979	0.924128
octyl_10mms_0g_run1	2	112	4.15093	0.908122
octyl_10mms_0g_run1	2	113	4.15206	0.897347
octyl_10mms_0g_run1	2	114	4.1532	0.895309
octyl_10mms_0g_run1	2	115	4.15767	0.874659
octyl_10mms_0g_run1	2	116	4.15881	0.878676
octyl_10mms_0g_run1	2	117	4.15994	0.883652
octyl_10mms_0g_run1	2	118	4.16107	0.892507
octyl_10mms_0g_run1	2	119	4.1622	0.901167
octyl_10mms_0g_run1	2	120	4.16667	0.90918
octyl_10mms_0g_run1	2	121	4.16781	0.892703
octyl_10mms_0g_run1	2	122	4.16894	0.905477
octyl_10mms_0g_run1	2	123	4.17007	0.89286
octyl_10mms_0g_run1	2	124	4.1712	0.888334
octyl_10mms_0g_run1	2	125	4.17567	0.880733
octyl_10mms_0g_run1	2	126	4.17681	0.887041
octyl_10mms_0g_run1	2	127	4.17794	0.893526
octyl_10mms_0g_run1	2	128	4.17908	0.879577
octyl_10mms_0g_run1	2	129	4.18021	0.892331
octyl_10mms_0g_run1	2	130	4.18468	0.878989
octyl_10mms_0g_run1	2	131	4.18581	0.900912
octyl_10mms_0g_run1	2	132	4.18695	0.88471
octyl_10mms_0g_run1	2	133	4.18808	0.892684
octyl_10mms_0g_run1	2	134	4.18922	0.89911
octyl_10mms_0g_run1	2	135	4.19367	0.899267
octyl_10mms_0g_run1	2	136	4.19481	0.888236
octyl_10mms_0g_run1	2	137	4.19594	0.897307
octyl_10mms_0g_run1	2	138	4.19707	0.89719
octyl_10mms_0g_run1	2	139	4.19821	0.90005
octyl_10mms_0g_run1	2	140	4.20268	0.88518
octyl_10mms_0g_run1	2	141	4.20381	0.886042
octyl_10mms_0g_run1	2	142	4.20495	0.893252
octyl_10mms_0g_run1	2	143	4.20608	0.90103
octyl_10mms_0g_run1	2	144	4.20722	0.888295
octyl_10mms_0g_run1	2	145	4.21167	0.891704
octyl_10mms_0g_run1	2	146	4.21281	0.895544
octyl_10mms_0g_run1	2	147	4.21395	0.900266
octyl_10mms_0g_run1	2	148	4.21508	0.89092
octyl_10mms_0g_run1	2	149	4.21622	0.913862
octyl_10mms_0g_run1	2	150	4.22068	0.891743
octyl_10mms_0g_run1	2	151	4.22182	0.896739
octyl_10mms_0g_run1	2	152	4.22295	0.886258
octyl_10mms_0g_run1	2	153	4.22409	0.887923
octyl_10mms_0g_run1	2	154	4.22522	0.882241
octyl_10mms_0g_run1	2	155	4.22968	0.90054
octyl_10mms_0g_run1	2	156	4.23081	0.893918
octyl_10mms_0g_run1	2	157	4.23195	0.892116
octyl_10mms_0g_run1	2	158	4.23309	0.913392
octyl_10mms_0g_run1	2	159	4.23422	0.904302
octyl_10mms_0g_run1	2	160	4.23868	0.889157
octyl_10mms_0g_run1	2	161	4.23981	0.891273
octyl_10mms_0g_run1	2	162	4.24095	0.885533
octyl_10mms_0g_run1	2	163	4.24208	0.884729
octyl_10mms_0g_run1	2	164	4.24322	0.875796
octyl_10mms_0g_run1	2	165	4.24768	0.892958
octyl_10mms_0g_run1	2	166	4.24881	0.895309
octyl_10mms_0g_run1	2	167	4.24995	0.912197
octyl_10mms_0g_run1	2	168	4.25108	0.895701
octyl_10mms_0g_run1	2	169	4.25222	0.89484
octyl_10mms_0g_run1	2	170	4.25668	0.891451
octyl_10mms_0g_run1	2	171	4.25782	0.86318
octyl_10mms_0g_run1	2	172	4.25895	0.869743
octyl_10mms_0g_run1	2	173	4.26009	0.882106
octyl_10mms_0g_run1	2	174	4.26122	0.891804
octyl_10mms_0g_run1	2	175	4.26568	0.894625
octyl_10mms_0g_run1	2	176	4.26681	0.903559
octyl_10mms_0g_run1	2	177	4.26795	0.871585
octyl_10mms_0g_run1	2	178	4.26908	0.89484
octyl_10mms_0g_run1	2	179	4.27022	0.887337
octyl_10mms_0g_run1	2	180	4.27468	0.870213
octyl_10mms_0g_run1	2	181	4.27582	0.875347
octyl_10mms_0g_run1	2	182	4.27695	0.883987
octyl_10mms_0g_run1	2	183	4.27808	0.895369
octyl_10mms_0g_run1	2	184	4.27922	0.883673
octyl_10mms_0g_run1	2	185	4.28365	0.899973
octyl_10mms_0g_run1	2	186	4.28475	0.886573
octyl_10mms_0g_run1	2	187	4.28585	0.894566
octyl_10mms_0g_run1	2	188	4.28696	0.879343
octyl_10mms_0g_run1	2	189	4.28806	0.887493
octyl_10mms_0g_run1	2	190	4.29267	0.883183
octyl_10mms_0g_run1	2	191	4.2938	0.891706
octyl_10mms_0g_run1	2	192	4.29494	0.884888
octyl_10mms_0g_run1	2	193	4.29607	0.887787
octyl_10mms_0g_run1	2	194	4.2972	0.893528
octyl_10mms_0g_run1	2	195	4.30168	0.905185
octyl_10mms_0g_run1	2	196	4.30281	0.882772
octyl_10mms_0g_run1	2	197	4.30395	0.877991
octyl_10mms_0g_run1	2	198	4.30508	0.888963
octyl_10mms_0g_run1	2	199	4.30621	0.887787
octyl_10mms_0g_run1	2	200	4.31068	0.880264
octyl_10mms_0g_run1	2	201	4.31181	0.888493
octyl_10mms_0g_run1	2	202	4.31295	0.889374
octyl_10mms_0g_run1	2	203	4.31408	0.894018
octyl_10mms_0g_run1	2	204	4.31521	0.882067
octyl_10mms_0g_run1	2	205	4.31968	0.881773
octyl_10mms_0g_run1	2	206	4.32081	0.868587
octyl_10mms_0g_run1	2	207	4.32195	0.891569
octyl_10mms_0g_run1	2	208	4.32308	0.878756
octyl_10mms_0g_run1	2	209	4.32422	0.88573
octyl_10mms_0g_run1	2	210	4.32869	0.89198
octyl_10mms_0g_run1	2	211	4.32982	0.893175
octyl_10mms_0g_run1	2	212	4.33096	0.883791
octyl_10mms_0g_run1	2	213	4.33209	0.888591
octyl_10mms_0g_run1	2	214	4.33322	0.908378
octyl_10mms_0g_run1	2	215	4.33768	0.890942
octyl_10mms_0g_run1	2	216	4.33882	0.878285
octyl_10mms_0g_run1	2	217	4.33995	0.886749
octyl_10mms_0g_run1	2	218	4.34109	0.85789
octyl_10mms_0g_run1	2	219	4.34222	0.875092
octyl_10mms_0g_run1	2	220	4.34668	0.885573
octyl_10mms_0g_run1	2	221	4.34782	0.887964
octyl_10mms_0g_run1	2	222	4.34895	0.89725
octyl_10mms_0g_run1	2	223	4.35009	0.909279
octyl_10mms_0g_run1	2	224	4.35122	0.880382
octyl_10mms_0g_run1	2	225	4.35568	0.881949
octyl_10mms_0g_run1	2	226	4.35682	0.892881
octyl_10mms_0g_run1	2	227	4.35795	0.872153
octyl_10mms_0g_run1	2	228	4.35909	0.874543
octyl_10mms_0g_run1	2	229	4.36022	0.881322
octyl_10mms_0g_run1	2	230	4.36469	0.888826
octyl_10mms_0g_run1	2	231	4.36582	0.897035
octyl_10mms_0g_run1	2	232	4.36696	0.898739
octyl_10mms_0g_run1	2	233	4.36809	0.88287
octyl_10mms_0g_run1	2	234	4.36922	0.888649
octyl_10mms_0g_run1	2	235	4.37369	0.894233
octyl_10mms_0g_run1	2	236	4.37482	0.869939
octyl_10mms_0g_run1	2	237	4.37595	0.879892
octyl_10mms_0g_run1	2	238	4.37709	0.875229
octyl_10mms_0g_run1	2	239	4.37822	0.86269
octyl_10mms_0g_run1	2	240	4.38268	0.813809
octyl_10mms_0g_run1	2	241	4.38381	0.791082
octyl_10mms_0g_run1	2	242	4.38495	0.773685
octyl_10mms_0g_run1	2	243	4.38608	0.737087
octyl_10mms_0g_run1	2	244	4.38722	0.727331
octyl_10mms_0g_run1	2	245	4.39169	0.691595
octyl_10mms_0g_run1	2	246	4.39282	0.713616
octyl_10mms_0g_run1	2	247	4.39395	0.697532
octyl_10mms_0g_run1	2	248	4.39509	0.712382
octyl_10mms_0g_run1	2	249	4.39622	0.717437
octyl_10mms_0g_run1	2	250	4.40068	0.730113
octyl_10mms_0g_run1	2	251	4.40182	0.717594
octyl_10mms_0g_run1	2	252	4.40295	0.704448
octyl_10mms_0g_run1	2	253	4.40409	0.703684
octyl_10mms_0g_run1	2	254	4.40522	0.685914
octyl_10mms_0g_run1	2	255	4.40969	0.694985
octyl_10mms_0g_run1	2	256	4.41082	0.669927
octyl_10mms_0g_run1	2	257	4.41196	0.676667
octyl_10mms_0g_run1	2	258	4.41309	0.675707
octyl_10mms_0g_run1	2	259	4.41423	0.681094
octyl_10mms_0g_run1	2	260	4.41869	0.677725
octyl_10mms_0g_run1	2	261	4.41982	0.670162
octyl_10mms_0g_run1	2	262	4.42096	0.668027
octyl_10mms_0g_run1	2	263	4.42209	0.666714
octyl_10mms_0g_run1	2	264	4.42322	0.664206
octyl_10mms_0g_run1	2	265	4.42765	0.657761
octyl_10mms_0g_run1	2	266	4.42876	0.655684
octyl_10mms_0g_run1	2	267	4.42986	0.656605
octyl_10mms_0g_run1	2	268	4.43096	0.656663
octyl_10mms_0g_run1	3	1	5.47286	0.442526
octyl_10mms_0g_run1	3	2	5.474	0.44476
octyl_10mms_0g_run1	3	3	5.47513	0.425364
octyl_10mms_0g_run1	3	4	5.47626	0.434082
octyl_10mms_0g_run1	3	5	5.48074	0.442898
octyl_10mms_0g_run1	3	6	5.48187	0.446777
octyl_10mms_0g_run1	3	7	5.48301	0.477106
octyl_10mms_0g_run1	3	8	5.48414	0.459453
octyl_10mms_0g_run1	3	9	5.48527	0.455143
octyl_10mms_0g_run1	3	10	5.48974	0.44476
octyl_10mms_0g_run1	3	11	5.49087	0.440449
octyl_10mms_0g_run1	3	12	5.492	0.42936
octyl_10mms_0g_run1	3	13	5.49314	0.460766
octyl_10mms_0g_run1	3	14	5.49427	0.434317
octyl_10mms_0g_run1	3	15	5.49873	0.444505
octyl_10mms_0g_run1	3	16	5.49987	0.4582
octyl_10mms_0g_run1	3	17	5.501	0.45722
octyl_10mms_0g_run1	3	18	5.50214	0.448051
octyl_10mms_0g_run1	3	19	5.50327	0.438862
octyl_10mms_0g_run1	3	20	5.50773	0.478164
octyl_10mms_0g_run1	3	21	5.50887	0.481377
octyl_10mms_0g_run1	3	22	5.51	0.52824
octyl_10mms_0g_run1	3	23	5.51113	0.55943
octyl_10mms_0g_run1	3	24	5.51227	0.596577
octyl_10mms_0g_run1	3	25	5.51674	0.733954
octyl_10mms_0g_run1	3	26	5.51787	0.756818
octyl_10mms_0g_run1	3	27	5.51901	0.762264
octyl_10mms_0g_run1	3	28	5.52014	0.774039
octyl_10mms_0g_run1	3	29	5.52128	0.790104
octyl_10mms_0g_run1	3	30	5.52574	0.824527
octyl_10mms_0g_run1	3	31	5.52687	0.823117
octyl_10mms_0g_run1	3	32	5.528	0.850447
octyl_10mms_0g_run1	3	33	5.52914	0.878248
octyl_10mms_0g_run1	3	34	5.53027	0.876896
octyl_10mms_0g_run1	3	35	5.53473	0.899486
octyl_10mms_0g_run1	3	36	5.53587	0.909595
octyl_10mms_0g_run1	3	37	5.537	0.901837
octyl_10mms_0g_run1	3	38	5.53814	0.900465
octyl_10mms_0g_run1	3	39	5.53927	0.897468
octyl_10mms_0g_run1	3	40	5.54374	0.896586
octyl_10mms_0g_run1	3	41	5.54487	0.912593
octyl_10mms_0g_run1	3	42	5.546	0.906127
octyl_10mms_0g_run1	3	43	5.54714	0.920253
octyl_10mms_0g_run1	3	44	5.54827	0.923956
octyl_10mms_0g_run1	3	45	5.55274	0.936593
octyl_10mms_0g_run1	3	46	5.55388	0.929579
octyl_10mms_0g_run1	3	47	5.55501	0.92664
octyl_10mms_0g_run1	3	48	5.55615	0.930755
octyl_10mms_0g_run1	3	49	5.55728	0.93432
octyl_10mms_0g_run1	3	50	5.56174	0.9324
octyl_10mms_0g_run1	3	51	5.56288	0.926777
octyl_10mms_0g_run1	3	52	5.56401	0.929951
octyl_10mms_0g_run1	3	53	5.56515	0.932224
octyl_10mms_0g_run1	3	54	5.56628	0.961259
octyl_10mms_0g_run1	3	55	5.57074	0.915199
octyl_10mms_0g_run1	3	56	5.57187	0.924074
octyl_10mms_0g_run1	3	57	5.57301	0.926033
octyl_10mms_0g_run1	3	58	5.57414	0.928815
octyl_10mms_0g_run1	3	59	5.57528	0.90791
octyl_10mms_0g_run1	3	60	5.5797	0.920018
octyl_10mms_0g_run1	3	61	5.58081	0.921057
octyl_10mms_0g_run1	3	62	5.58191	0.930872
octyl_10mms_0g_run1	3	63	5.58302	0.953266
octyl_10mms_0g_run1	3	64	5.58412	0.93387
octyl_10mms_0g_run1	3	65	5.58873	0.915904
octyl_10mms_0g_run1	3	66	5.58986	0.921429
octyl_10mms_0g_run1	3	67	5.591	0.911378
octyl_10mms_0g_run1	3	68	5.59213	0.903267
octyl_10mms_0g_run1	3	69	5.59327	0.929168
octyl_10mms_0g_run1	3	70	5.59774	0.918862
octyl_10mms_0g_run1	3	71	5.59887	0.91175
octyl_10mms_0g_run1	3	72	5.60001	0.929501
octyl_10mms_0g_run1	3	73	5.60114	0.923251
octyl_10mms_0g_run1	3	74	5.60228	0.917824
octyl_10mms_0g_run1	3	75	5.60674	0.903914
octyl_10mms_0g_run1	3	76	5.60787	0.901288
octyl_10mms_0g_run1	3	77	5.60901	0.892727
octyl_10mms_0g_run1	3	78	5.61014	0.900838
octyl_10mms_0g_run1	3	79	5.61128	0.896606
octyl_10mms_0g_run1	3	80	5.61574	0.909654
octyl_10mms_0g_run1	3	81	5.61687	0.921938
octyl_10mms_0g_run1	3	82	5.61801	0.922173
octyl_10mms_0g_run1	3	83	5.61914	0.907323
octyl_10mms_0g_run1	3	84	5.62028	0.902072
octyl_10mms_0g_run1	3	85	5.62474	0.875133
octyl_10mms_0g_run1	3	86	5.62588	0.900328
octyl_10mms_0g_run1	3	87	5.62701	0.894588
octyl_10mms_0g_run1	3	88	5.62815	0.902248
octyl_10mms_0g_run1	3	89	5.62928	0.909125
octyl_10mms_0g_run1	3	90	5.63374	0.928168
octyl_10mms_0g_run1	3	91	5.63487	0.885086
octyl_10mms_0g_run1	3	92	5.636	0.908831
octyl_10mms_0g_run1	3	93	5.63714	0.900387
octyl_10mms_0g_run1	3	94	5.63827	0.910438
octyl_10mms_0g_run1	3	95	5.64274	0.888475
octyl_10mms_0g_run1	3	96	5.64387	0.895528
octyl_10mms_0g_run1	3	97	5.64501	0.902346
octyl_10mms_0g_run1	3	98	5.64615	0.907048
octyl_10mms_0g_run1	3	99	5.64728	0.898467
octyl_10mms_0g_run1	3	100	5.65174	0.906186
octyl_10mms_0g_run1	3	101	5.65288	0.898741
octyl_10mms_0g_run1	3	102	5.65401	0.903972
octyl_10mms_0g_run1	3	103	5.65514	0.896724
octyl_10mms_0g_run1	3	104	5.65628	0.901328
octyl_10mms_0g_run1	3	105	5.66074	0.900936
octyl_10mms_0g_run1	3	106	5.66188	0.907068
octyl_10mms_0g_run1	3	107	5.66302	0.899192
octyl_10mms_0g_run1	3	108	5.66415	0.899682
octyl_10mms_0g_run1	3	109	5.66528	0.907362
octyl_10mms_0g_run1	3	110	5.66974	0.903914
octyl_10mms_0g_run1	3	111	5.67088	0.902386
octyl_10mms_0g_run1	3	112	5.67201	0.894529
octyl_10mms_0g_run1	3	113	5.67315	0.902581
octyl_10mms_0g_run1	3	114	5.67428	0.899741
octyl_10mms_0g_run1	3	115	5.67874	0.899858
octyl_10mms_0g_run1	3	116	5.67988	0.900035
octyl_10mms_0g_run1	3	117	5.68101	0.902503
octyl_10mms_0g_run1	3	118	5.68215	0.905579
octyl_10mms_0g_run1	3	119	5.68328	0.910399
octyl_10mms_0g_run1	3	120	5.68774	0.887888
octyl_10mms_0g_run1	3	121	5.68888	0.89543
octyl_10mms_0g_run1	3	122	5.69001	0.901915
octyl_10mms_0g_run1	3	123	5.69115	0.884106
octyl_10mms_0g_run1	3	124	5.69228	0.883929
octyl_10mms_0g_run1	3	125	5.69675	0.897722
octyl_10mms_0g_run1	3	126	5.69788	0.903286
octyl_10mms_0g_run1	3	127	5.69901	0.893647
octyl_10mms_0g_run1	3	128	5.70015	0.911534
octyl_10mms_0g_run1	3	129	5.70128	0.915355
octyl_10mms_0g_run1	3	130	5.70575	0.901974
octyl_10mms_0g_run1	3	131	5.70688	0.889454
octyl_10mms_0g_run1	3	132	5.70802	0.861536
octyl_10mms_0g_run1	3	133	5.70915	0.888651
octyl_10mms_0g_run1	3	134	5.71029	0.891825
octyl_10mms_0g_run1	3	135	5.71474	0.895763
octyl_10mms_0g_run1	3	136	5.71588	0.896116
octyl_10mms_0g_run1	3	137	5.71701	0.915237
octyl_10mms_0g_run1	3	138	5.71815	0.89588
octyl_10mms_0g_run1	3	139	5.71928	0.895547
octyl_10mms_0g_run1	3	140	5.72371	0.890277
octyl_10mms_0g_run1	3	141	5.72482	0.874623
octyl_10mms_0g_run1	3	142	5.72592	0.892138
octyl_10mms_0g_run1	3	143	5.72702	0.882519
octyl_10mms_0g_run1	3	144	5.72813	0.8959
octyl_10mms_0g_run1	3	145	5.73273	0.899074
octyl_10mms_0g_run1	3	146	5.73387	0.91655
octyl_10mms_0g_run1	3	147	5.735	0.88344
octyl_10mms_0g_run1	3	148	5.73614	0.893196
octyl_10mms_0g_run1	3	149	5.73727	0.892609
octyl_10mms_0g_run1	3	150	5.74175	0.885399
octyl_10mms_0g_run1	3	151	5.74288	0.877817
octyl_10mms_0g_run1	3	152	5.74401	0.893236
octyl_10mms_0g_run1	3	153	5.74515	0.89445
octyl_10mms_0g_run1	3	154	5.74628	0.896018
octyl_10mms_0g_run1	3	155	5.75074	0.909516
octyl_10mms_0g_run1	3	156	5.75188	0.901523
octyl_10mms_0g_run1	3	157	5.75301	0.891609
octyl_10mms_0g_run1	3	158	5.75415	0.888044
octyl_10mms_0g_run1	3	159	5.75528	0.886986
octyl_10mms_0g_run1	3	160	5.75974	0.895861
octyl_10mms_0g_run1	3	161	5.76088	0.888651
octyl_10mms_0g_run1	3	162	5.76201	0.901288
octyl_10mms_0g_run1	3	163	5.76315	0.891276
octyl_10mms_0g_run1	3	164	5.76428	0.89829
octyl_10mms_0g_run1	3	165	5.76875	0.907988
octyl_10mms_0g_run1	3	166	5.76988	0.896664
octyl_10mms_0g_run1	3	167	5.77102	0.892491
octyl_10mms_0g_run1	3	168	5.77215	0.891923
octyl_10mms_0g_run1	3	169	5.77329	0.895116
octyl_10mms_0g_run1	3	170	5.77774	0.89396
octyl_10mms_0g_run1	3	171	5.77888	0.885379
octyl_10mms_0g_run1	3	172	5.78001	0.892197
octyl_10mms_0g_run1	3	173	5.78114	0.897134
octyl_10mms_0g_run1	3	174	5.78228	0.895802
octyl_10mms_0g_run1	3	175	5.78675	0.884008
octyl_10mms_0g_run1	3	176	5.78788	0.885418
octyl_10mms_0g_run1	3	177	5.78902	0.892863
octyl_10mms_0g_run1	3	178	5.79015	0.893784
octyl_10mms_0g_run1	3	179	5.79128	0.869667
octyl_10mms_0g_run1	3	180	5.79575	0.892374
octyl_10mms_0g_run1	3	181	5.79688	0.894803
octyl_10mms_0g_run1	3	182	5.79801	0.898839
octyl_10mms_0g_run1	3	183	5.79915	0.894137
octyl_10mms_0g_run1	3	184	5.80028	0.911338
octyl_10mms_0g_run1	3	185	5.80475	0.894098
octyl_10mms_0g_run1	3	186	5.80589	0.895391
octyl_10mms_0g_run1	3	187	5.80702	0.88967
octyl_10mms_0g_run1	3	188	5.80816	0.865552
octyl_10mms_0g_run1	3	189	5.80929	0.877797
octyl_10mms_0g_run1	3	190	5.81375	0.892119
octyl_10mms_0g_run1	3	191	5.81488	0.884811
octyl_10mms_0g_run1	3	192	5.81602	0.89157
octyl_10mms_0g_run1	3	193	5.81716	0.904697
octyl_10mms_0g_run1	3	194	5.81829	0.875407
octyl_10mms_0g_run1	3	195	5.82275	0.887123
octyl_10mms_0g_run1	3	196	5.82388	0.889356
octyl_10mms_0g_run1	3	197	5.82502	0.872664
octyl_10mms_0g_run1	3	198	5.82615	0.878444
octyl_10mms_0g_run1	3	199	5.82728	0.882127
octyl_10mms_0g_run1	3	200	5.83175	0.88581
octyl_10mms_0g_run1	3	201	5.83288	0.893353
octyl_10mms_0g_run1	3	202	5.83402	0.902914
octyl_10mms_0g_run1	3	203	5.83515	0.892256
octyl_10mms_0g_run1	3	204	5.83628	0.884086
octyl_10mms_0g_run1	3	205	5.84075	0.887182
octyl_10mms_0g_run1	3	206	5.84189	0.876857
octyl_10mms_0g_run1	3	207	5.84302	0.878816
octyl_10mms_0g_run1	3	208	5.84416	0.881951
octyl_10mms_0g_run1	3	209	5.84529	0.890395
octyl_10mms_0g_run1	3	210	5.84975	0.927717
octyl_10mms_0g_run1	3	211	5.85088	0.898741
octyl_10mms_0g_run1	3	212	5.85202	0.89737
octyl_10mms_0g_run1	3	213	5.85315	0.884067
octyl_10mms_0g_run1	3	214	5.85428	0.891159
octyl_10mms_0g_run1	3	215	5.85875	0.866983
octyl_10mms_0g_run1	3	216	5.85989	0.904403
octyl_10mms_0g_run1	3	217	5.86102	0.878953
octyl_10mms_0g_run1	3	218	5.86216	0.895116
octyl_10mms_0g_run1	3	219	5.86329	0.885183
octyl_10mms_0g_run1	3	220	5.86772	0.902581
octyl_10mms_0g_run1	3	221	5.86882	0.896155
octyl_10mms_0g_run1	3	222	5.86992	0.891512
octyl_10mms_0g_run1	3	223	5.87103	0.894607
octyl_10mms_0g_run1	3	224	5.87213	0.883185
octyl_10mms_0g_run1	3	225	5.87674	0.888181
octyl_10mms_0g_run1	3	226	5.87787	0.888769
octyl_10mms_0g_run1	3	227	5.879	0.888005
octyl_10mms_0g_run1	3	228	5.88014	0.8911
octyl_10mms_0g_run1	3	229	5.88127	0.887652
octyl_10mms_0g_run1	3	230	5.88575	0.89257
octyl_10mms_0g_run1	3	231	5.88689	0.880462
octyl_10mms_0g_run1	3	232	5.88802	0.882245
octyl_10mms_0g_run1	3	233	5.88916	0.887182
octyl_10mms_0g_run1	3	234	5.8903	0.883988
octyl_10mms_0g_run1	3	235	5.89475	0.882029
octyl_10mms_0g_run1	3	236	5.89589	0.896605
octyl_10mms_0g_run1	3	237	5.89702	0.886888
octyl_10mms_0g_run1	3	238	5.89816	0.890454
octyl_10mms_0g_run1	3	239	5.8993	0.883851
octyl_10mms_0g_run1	3	240	5.90375	0.88393
octyl_10mms_0g_run1	3	241	5.90489	0.874232
octyl_10mms_0g_run1	3	242	5.90602	0.86373
octyl_10mms_0g_run1	3	243	5.90715	0.844628
octyl_10mms_0g_run1	3	244	5.90829	0.824351
octyl_10mms_0g_run1	3	245	5.91276	0.771237
octyl_10mms_0g_run1	3	246	5.91389	0.743476
octyl_10mms_0g_run1	3	247	5.91503	0.735424
octyl_10mms_0g_run1	3	248	5.91616	0.729115
octyl_10mms_0g_run1	3	249	5.9173	0.728508
octyl_10mms_0g_run1	3	250	5.92176	0.707544
octyl_10mms_0g_run1	3	251	5.92289	0.712638
octyl_10mms_0g_run1	3	252	5.92402	0.715636
octyl_10mms_0g_run1	3	253	5.92516	0.704096
octyl_10mms_0g_run1	3	254	5.92629	0.706467
octyl_10mms_0g_run1	3	255	5.93075	0.707074
octyl_10mms_0g_run1	3	256	5.93189	0.695574
octyl_10mms_0g_run1	3	257	5.93302	0.719966
octyl_10mms_0g_run1	3	258	5.93416	0.701314
octyl_10mms_0g_run1	3	259	5.93529	0.687835
octyl_10mms_0g_run1	3	260	5.93975	0.675767
octyl_10mms_0g_run1	3	261	5.94089	0.678
octyl_10mms_0g_run1	3	262	5.94202	0.666715
octyl_10mms_0g_run1	3	263	5.94316	0.689148
octyl_10mms_0g_run1	3	264	5.94429	0.67224
octyl_10mms_0g_run1	3	265	5.94876	0.67032
octyl_10mms_0g_run1	3	266	5.94989	0.68713
octyl_10mms_0g_run1	3	267	5.95103	0.674983
octyl_10mms_0g_run1	3	268	5.95216	0.672808
octyl_10mms_0g_run2	1	1	2.68153	0.532904
octyl_10mms_0g_run2	1	2	2.68266	0.53265
octyl_10mms_0g_run2	1	3	2.6838	0.532689
octyl_10mms_0g_run2	1	4	2.68493	0.533453
octyl_10mms_0g_run2	1	5	2.68607	0.534531
octyl_10mms_0g_run2	1	6	2.69053	0.531298
octyl_10mms_0g_run2	1	7	2.69166	0.541192
octyl_10mms_0g_run2	1	8	2.69279	0.535236
octyl_10mms_0g_run2	1	9	2.69393	0.533512
octyl_10mms_0g_run2	1	10	2.69506	0.537528
octyl_10mms_0g_run2	1	11	2.6995	0.52881
octyl_10mms_0g_run2	1	12	2.7006	0.528888
octyl_10mms_0g_run2	1	13	2.7017	0.529123
octyl_10mms_0g_run2	1	14	2.70281	0.531024
octyl_10mms_0g_run2	1	15	2.70391	0.497659
octyl_10mms_0g_run2	1	16	2.70852	0.523814
octyl_10mms_0g_run2	1	17	2.70965	0.545776
octyl_10mms_0g_run2	1	18	2.71079	0.562508
octyl_10mms_0g_run2	1	19	2.71192	0.576202
octyl_10mms_0g_run2	1	20	2.71305	0.605003
octyl_10mms_0g_run2	1	21	2.71753	0.716069
octyl_10mms_0g_run2	1	22	2.71867	0.759759
octyl_10mms_0g_run2	1	23	2.7198	0.784954
octyl_10mms_0g_run2	1	24	2.72094	0.80482
octyl_10mms_0g_run2	1	25	2.72207	0.845571
octyl_10mms_0g_run2	1	26	2.72653	0.909205
octyl_10mms_0g_run2	1	27	2.72767	0.915808
octyl_10mms_0g_run2	1	28	2.7288	0.956774
octyl_10mms_0g_run2	1	29	2.72993	0.960085
octyl_10mms_0g_run2	1	30	2.73107	0.949682
octyl_10mms_0g_run2	1	31	2.73553	0.984869
octyl_10mms_0g_run2	1	32	2.73666	1.00417
octyl_10mms_0g_run2	1	33	2.7378	1.00809
octyl_10mms_0g_run2	1	34	2.73893	1.03105
octyl_10mms_0g_run2	1	35	2.74006	1.00758
octyl_10mms_0g_run2	1	36	2.74454	1.01663
octyl_10mms_0g_run2	1	37	2.74567	1.04341
octyl_10mms_0g_run2	1	38	2.74681	1.03354
octyl_10mms_0g_run2	1	39	2.74794	1.02121
octyl_10mms_0g_run2	1	40	2.74907	1.0152
octyl_10mms_0g_run2	1	41	2.75353	1.02094
octyl_10mms_0g_run2	1	42	2.75467	1.01008
octyl_10mms_0g_run2	1	43	2.7558	1.02734
octyl_10mms_0g_run2	1	44	2.75693	1.02237
octyl_10mms_0g_run2	1	45	2.75806	1.03326
octyl_10mms_0g_run2	1	46	2.76253	1.04795
octyl_10mms_0g_run2	1	47	2.76366	1.03062
octyl_10mms_0g_run2	1	48	2.7648	1.0228
octyl_10mms_0g_run2	1	49	2.76593	1.02468
octyl_10mms_0g_run2	1	50	2.76706	1.01661
octyl_10mms_0g_run2	1	51	2.77153	1.00889
octyl_10mms_0g_run2	1	52	2.77267	1.01584
octyl_10mms_0g_run2	1	53	2.7738	1.03024
octyl_10mms_0g_run2	1	54	2.77493	1.02529
octyl_10mms_0g_run2	1	55	2.77607	1.02509
octyl_10mms_0g_run2	1	56	2.78054	1.03085
octyl_10mms_0g_run2	1	57	2.78167	1.03708
octyl_10mms_0g_run2	1	58	2.7828	1.01539
octyl_10mms_0g_run2	1	59	2.78394	1.01733
octyl_10mms_0g_run2	1	60	2.78507	1.02423
octyl_10mms_0g_run2	1	61	2.78953	1.01347
octyl_10mms_0g_run2	1	62	2.79066	1.02127
octyl_10mms_0g_run2	1	63	2.7918	1.00489
octyl_10mms_0g_run2	1	64	2.79293	1.02374
octyl_10mms_0g_run2	1	65	2.79407	1.02441
octyl_10mms_0g_run2	1	66	2.79853	1.02205
octyl_10mms_0g_run2	1	67	2.79966	1.00297
octyl_10mms_0g_run2	1	68	2.80079	1.0133
octyl_10mms_0g_run2	1	69	2.80193	1.02292
octyl_10mms_0g_run2	1	70	2.80306	1.0101
octyl_10mms_0g_run2	1	71	2.80754	1.00321
octyl_10mms_0g_run2	1	72	2.80867	1.01712
octyl_10mms_0g_run2	1	73	2.8098	1.02182
octyl_10mms_0g_run2	1	74	2.81094	1.01357
octyl_10mms_0g_run2	1	75	2.81207	1.03452
octyl_10mms_0g_run2	1	76	2.81654	1.00811
octyl_10mms_0g_run2	1	77	2.81767	1.01484
octyl_10mms_0g_run2	1	78	2.8188	1.01196
octyl_10mms_0g_run2	1	79	2.81994	1.00846
octyl_10mms_0g_run2	1	80	2.82107	0.994881
octyl_10mms_0g_run2	1	81	2.82554	1.01694
octyl_10mms_0g_run2	1	82	2.82667	1.01365
octyl_10mms_0g_run2	1	83	2.8278	1.00999
octyl_10mms_0g_run2	1	84	2.82894	1.03732
octyl_10mms_0g_run2	1	85	2.83007	1.0297
octyl_10mms_0g_run2	1	86	2.83454	1.01334
octyl_10mms_0g_run2	1	87	2.83567	1.0054
octyl_10mms_0g_run2	1	88	2.8368	1.01087
octyl_10mms_0g_run2	1	89	2.83794	1.00135
octyl_10mms_0g_run2	1	90	2.83908	1.01767
octyl_10mms_0g_run2	1	91	2.8435	1.0028
octyl_10mms_0g_run2	1	92	2.8446	1.00789
octyl_10mms_0g_run2	1	93	2.8457	1.02881
octyl_10mms_0g_run2	1	94	2.84681	1.01631
octyl_10mms_0g_run2	1	95	2.84791	1.00897
octyl_10mms_0g_run2	1	96	2.85252	1.00722
octyl_10mms_0g_run2	1	97	2.85366	1.00436
octyl_10mms_0g_run2	1	98	2.85479	0.994058
octyl_10mms_0g_run2	1	99	2.85592	0.992706
octyl_10mms_0g_run2	1	100	2.85705	1.00936
octyl_10mms_0g_run2	1	101	2.86154	1.01206
octyl_10mms_0g_run2	1	102	2.86267	1.0216
octyl_10mms_0g_run2	1	103	2.86381	1.01238
octyl_10mms_0g_run2	1	104	2.86494	1.01253
octyl_10mms_0g_run2	1	105	2.86607	1.00803
octyl_10mms_0g_run2	1	106	2.87054	0.973917
octyl_10mms_0g_run2	1	107	2.87167	0.990668
octyl_10mms_0g_run2	1	108	2.87281	0.996448
octyl_10mms_0g_run2	1	109	2.87394	1.01171
octyl_10mms_0g_run2	1	110	2.87508	1.00113
octyl_10mms_0g_run2	1	111	2.87954	1.01929
octyl_10mms_0g_run2	1	112	2.88067	0.994783
octyl_10mms_0g_run2	1	113	2.8818	1.0172
octyl_10mms_0g_run2	1	114	2.88294	1.00487
octyl_10mms_0g_run2	1	115	2.88407	1.00834
octyl_10mms_0g_run2	1	116	2.88854	1.00168
octyl_10mms_0g_run2	1	117	2.88968	1.00993
octyl_10mms_0g_run2	1	118	2.89081	1.01326
octyl_10mms_0g_run2	1	119	2.89195	1.0083
octyl_10mms_0g_run2	1	120	2.89308	1.01332
octyl_10mms_0g_run2	1	121	2.89754	1.02204
octyl_10mms_0g_run2	1	122	2.89868	1.0104
octyl_10mms_0g_run2	1	123	2.89981	0.997839
octyl_10mms_0g_run2	1	124	2.90094	1.00597
octyl_10mms_0g_run2	1	125	2.90208	1.01228
octyl_10mms_0g_run2	1	126	2.90654	1.00372
octyl_10mms_0g_run2	1	127	2.90767	1.00407
octyl_10mms_0g_run2	1	128	2.9088	1.00705
octyl_10mms_0g_run2	1	129	2.90994	1.01306
octyl_10mms_0g_run2	1	130	2.91107	1.00685
octyl_10mms_0g_run2	1	131	2.91554	1.00427
octyl_10mms_0g_run2	1	132	2.91667	1.0113
octyl_10mms_0g_run2	1	133	2.91781	1.00822
octyl_10mms_0g_run2	1	134	2.91894	1.00779
octyl_10mms_0g_run2	1	135	2.92007	1.00272
octyl_10mms_0g_run2	1	136	2.92454	1.01038
octyl_10mms_0g_run2	1	137	2.92568	1.0113
octyl_10mms_0g_run2	1	138	2.92681	1.01071
octyl_10mms_0g_run2	1	139	2.92795	1.00385
octyl_10mms_0g_run2	1	140	2.92908	1.02766
octyl_10mms_0g_run2	1	141	2.93354	1.00787
octyl_10mms_0g_run2	1	142	2.93467	1.00936
octyl_10mms_0g_run2	1	143	2.93581	1.00303
octyl_10mms_0g_run2	1	144	2.93694	1.00554
octyl_10mms_0g_run2	1	145	2.93807	1.00327
octyl_10mms_0g_run2	1	146	2.94254	1.0124
octyl_10mms_0g_run2	1	147	2.94367	1.00554
octyl_10mms_0g_run2	1	148	2.9448	1.01155
octyl_10mms_0g_run2	1	149	2.94594	1.03187
octyl_10mms_0g_run2	1	150	2.94708	1.01747
octyl_10mms_0g_run2	1	151	2.95154	1.00497
octyl_10mms_0g_run2	1	152	2.95268	1.00795
octyl_10mms_0g_run2	1	153	2.95381	0.982185
octyl_10mms_0g_run2	1	154	2.95494	0.998838
octyl_10mms_0g_run2	1	155	2.95608	1.00129
octyl_10mms_0g_run2	1	156	2.96055	1.01069
octyl_10mms_0g_run2	1	157	2.96168	1.02215
octyl_10mms_0g_run2	1	158	2.96282	1.03152
octyl_10mms_0g_run2	1	159	2.96395	0.997271
octyl_10mms_0g_run2	1	160	2.96509	1.01628
octyl_10mms_0g_run2	1	161	2.96954	1.01492
octyl_10mms_0g_run2	1	162	2.97068	1.00174
octyl_10mms_0g_run2	1	163	2.97181	0.997486
octyl_10mms_0g_run2	1	164	2.97294	1.00742
octyl_10mms_0g_run2	1	165	2.97407	1.01635
octyl_10mms_0g_run2	1	166	2.97854	1.02078
octyl_10mms_0g_run2	1	167	2.97967	1.02478
octyl_10mms_0g_run2	1	168	2.98081	1.01559
octyl_10mms_0g_run2	1	169	2.98194	1.01651
octyl_10mms_0g_run2	1	170	2.98308	1.00037
octyl_10mms_0g_run2	1	171	2.98751	0.994646
octyl_10mms_0g_run2	1	172	2.98861	1.00483
octyl_10mms_0g_run2	1	173	2.98972	1.01138
octyl_10mms_0g_run2	1	174	2.99082	1.01053
octyl_10mms_0g_run2	1	175	2.99192	1.00736
octyl_10mms_0g_run2	1	176	2.99653	1.02348
octyl_10mms_0g_run2	1	177	2.99766	1.01988
octyl_10mms_0g_run2	1	178	2.9988	1.00865
octyl_10mms_0g_run2	1	179	2.99993	0.995782
octyl_10mms_0g_run2	1	180	3.00106	1.00468
octyl_10mms_0g_run2	1	181	3.00554	1.02827
octyl_10mms_0g_run2	1	182	3.00668	1.00474
octyl_10mms_0g_run2	1	183	3.00781	1.00397
octyl_10mms_0g_run2	1	184	3.00894	1.01144
octyl_10mms_0g_run2	1	185	3.01008	1.0152
octyl_10mms_0g_run2	1	186	3.01455	1.01812
octyl_10mms_0g_run2	1	187	3.01568	1.00133
octyl_10mms_0g_run2	1	188	3.01681	1.00493
octyl_10mms_0g_run2	1	189	3.01795	1.01361
octyl_10mms_0g_run2	1	190	3.01908	1.00558
octyl_10mms_0g_run2	1	191	3.02354	1.00184
octyl_10mms_0g_run2	1	192	3.02468	1.01081
octyl_10mms_0g_run2	1	193	3.02581	1.01628
octyl_10mms_0g_run2	1	194	3.02695	1.00809
octyl_10mms_0g_run2	1	195	3.02808	1.01285
octyl_10mms_0g_run2	1	196	3.03255	1.00442
octyl_10mms_0g_run2	1	197	3.03368	1.01003
octyl_10mms_0g_run2	1	198	3.03482	1.00824
octyl_10mms_0g_run2	1	199	3.03595	1.0084
octyl_10mms_0g_run2	1	200	3.03708	0.974055
octyl_10mms_0g_run2	1	201	3.04155	1.0218
octyl_10mms_0g_run2	1	202	3.04268	1.01177
octyl_10mms_0g_run2	1	203	3.04382	1.00826
octyl_10mms_0g_run2	1	204	3.04495	1.01296
octyl_10mms_0g_run2	1	205	3.04608	1.02531
octyl_10mms_0g_run2	1	206	3.05054	1.00777
octyl_10mms_0g_run2	1	207	3.05167	1.00231
octyl_10mms_0g_run2	1	208	3.0528	1.0062
octyl_10mms_0g_run2	1	209	3.05394	0.990198
octyl_10mms_0g_run2	1	210	3.05507	0.988709
octyl_10mms_0g_run2	1	211	3.05955	1.00276
octyl_10mms_0g_run2	1	212	3.06068	1.00797
octyl_10mms_0g_run2	1	213	3.06181	1.01006
octyl_10mms_0g_run2	1	214	3.06294	1.01671
octyl_10mms_0g_run2	1	215	3.06408	1.00362
octyl_10mms_0g_run2	1	216	3.06855	1.00701
octyl_10mms_0g_run2	1	217	3.06969	1.00662
octyl_10mms_0g_run2	1	218	3.07082	0.989082
octyl_10mms_0g_run2	1	219	3.07196	0.996076
octyl_10mms_0g_run2	1	220	3.07309	1.00332
octyl_10mms_0g_run2	1	221	3.07754	1.01398
octyl_10mms_0g_run2	1	222	3.07868	1.03538
octyl_10mms_0g_run2	1	223	3.07981	1.02057
octyl_10mms_0g_run2	1	224	3.08095	1.0169
octyl_10mms_0g_run2	1	225	3.08208	1.01061
octyl_10mms_0g_run2	1	226	3.08655	1.00773
octyl_10mms_0g_run2	1	227	3.08768	0.98485
octyl_10mms_0g_run2	1	228	3.08881	1.02243
octyl_10mms_0g_run2	1	229	3.08994	1.00199
octyl_10mms_0g_run2	1	230	3.09108	1.00699
octyl_10mms_0g_run2	1	231	3.09555	1.02437
octyl_10mms_0g_run2	1	232	3.09669	1.02305
octyl_10mms_0g_run2	1	233	3.09782	1.01972
octyl_10mms_0g_run2	1	234	3.09895	1.00834
octyl_10mms_0g_run2	1	235	3.10008	1.00724
octyl_10mms_0g_run2	1	236	3.10455	0.990101
octyl_10mms_0g_run2	1	237	3.10568	1.02066
octyl_10mms_0g_run2	1	238	3.10682	1.00468
octyl_10mms_0g_run2	1	239	3.10795	1.0083
octyl_10mms_0g_run2	1	240	3.10908	0.998173
octyl_10mms_0g_run2	1	241	3.11355	0.95991
octyl_10mms_0g_run2	1	242	3.11469	0.929621
octyl_10mms_0g_run2	1	243	3.11582	0.898117
octyl_10mms_0g_run2	1	244	3.11695	0.877095
octyl_10mms_0g_run2	1	245	3.11809	0.85817
octyl_10mms_0g_run2	1	246	3.12255	0.79765
octyl_10mms_0g_run2	1	247	3.12368	0.814284
octyl_10mms_0g_run2	1	248	3.12482	0.817536
octyl_10mms_0g_run2	1	249	3.12595	0.815831
octyl_10mms_0g_run2	1	250	3.12709	0.815185
octyl_10mms_0g_run2	1	251	3.13152	0.824863
octyl_10mms_0g_run2	1	252	3.13262	0.803626
octyl_10mms_0g_run2	1	253	3.13372	0.803195
octyl_10mms_0g_run2	1	254	3.13482	0.801647
octyl_10mms_0g_run2	1	255	3.13593	0.792733
octyl_10mms_0g_run2	1	256	3.14054	0.766675
octyl_10mms_0g_run2	1	257	3.14167	0.761915
octyl_10mms_0g_run2	1	258	3.14281	0.767302
octyl_10mms_0g_run2	1	259	3.14394	0.770065
octyl_10mms_0g_run2	1	260	3.14508	0.769908
octyl_10mms_0g_run2	1	261	3.14955	0.76021
octyl_10mms_0g_run2	1	262	3.15069	0.762463
octyl_10mms_0g_run2	1	263	3.15182	0.758075
octyl_10mms_0g_run2	1	264	3.15295	0.756409
octyl_10mms_0g_run2	1	265	3.15409	0.737229
octyl_10mms_0g_run2	1	266	3.15855	0.744556
octyl_10mms_0g_run2	1	267	3.15969	0.74389
octyl_10mms_0g_run2	1	268	3.16082	0.740266
octyl_10mms_0g_run2	2	1	3.6007	0.579024
octyl_10mms_0g_run2	2	2	3.60184	0.575772
octyl_10mms_0g_run2	2	3	3.60297	0.579083
octyl_10mms_0g_run2	2	4	3.60411	0.561392
octyl_10mms_0g_run2	2	5	3.60858	0.578907
octyl_10mms_0g_run2	2	6	3.60971	0.579024
octyl_10mms_0g_run2	2	7	3.61084	0.580886
octyl_10mms_0g_run2	2	8	3.61198	0.604827
octyl_10mms_0g_run2	2	9	3.61312	0.59364
octyl_10mms_0g_run2	2	10	3.61757	0.572677
octyl_10mms_0g_run2	2	11	3.61871	0.577888
octyl_10mms_0g_run2	2	12	3.61984	0.574675
octyl_10mms_0g_run2	2	13	3.62098	0.560432
octyl_10mms_0g_run2	2	14	3.62211	0.592288
octyl_10mms_0g_run2	2	15	3.62657	0.575694
octyl_10mms_0g_run2	2	16	3.62771	0.577947
octyl_10mms_0g_run2	2	17	3.62884	0.590192
octyl_10mms_0g_run2	2	18	3.62998	0.591446
octyl_10mms_0g_run2	2	19	3.63111	0.578241
octyl_10mms_0g_run2	2	20	3.63557	0.576242
octyl_10mms_0g_run2	2	21	3.63671	0.572657
octyl_10mms_0g_run2	2	22	3.63784	0.583766
octyl_10mms_0g_run2	2	23	3.63898	0.605787
octyl_10mms_0g_run2	2	24	3.64011	0.618815
octyl_10mms_0g_run2	2	25	3.64458	0.744243
octyl_10mms_0g_run2	2	26	3.64571	0.795926
octyl_10mms_0g_run2	2	27	3.64684	0.81828
octyl_10mms_0g_run2	2	28	3.64798	0.846493
octyl_10mms_0g_run2	2	29	3.64911	0.869552
octyl_10mms_0g_run2	2	30	3.65357	0.901938
octyl_10mms_0g_run2	2	31	3.65471	0.933383
octyl_10mms_0g_run2	2	32	3.65584	0.938202
octyl_10mms_0g_run2	2	33	3.65698	0.961419
octyl_10mms_0g_run2	2	34	3.65811	0.975505
octyl_10mms_0g_run2	2	35	3.66257	1.0248
octyl_10mms_0g_run2	2	36	3.6637	0.996958
octyl_10mms_0g_run2	2	37	3.66484	1.02527
octyl_10mms_0g_run2	2	38	3.66598	1.03616
octyl_10mms_0g_run2	2	39	3.66711	1.02482
octyl_10mms_0g_run2	2	40	3.67157	1.02053
octyl_10mms_0g_run2	2	41	3.67271	1.0335
octyl_10mms_0g_run2	2	42	3.67384	1.044
octyl_10mms_0g_run2	2	43	3.67498	1.04171
octyl_10mms_0g_run2	2	44	3.67611	1.04394
octyl_10mms_0g_run2	2	45	3.68058	1.0641
octyl_10mms_0g_run2	2	46	3.68171	1.07135
octyl_10mms_0g_run2	2	47	3.68285	1.0564
octyl_10mms_0g_run2	2	48	3.68398	1.06416
octyl_10mms_0g_run2	2	49	3.68512	1.06901
octyl_10mms_0g_run2	2	50	3.68958	1.07262
octyl_10mms_0g_run2	2	51	3.69071	1.07068
octyl_10mms_0g_run2	2	52	3.69184	1.06561
octyl_10mms_0g_run2	2	53	3.69298	1.07377
octyl_10mms_0g_run2	2	54	3.69411	1.07444
octyl_10mms_0g_run2	2	55	3.69858	1.06523
octyl_10mms_0g_run2	2	56	3.69971	1.06039
octyl_10mms_0g_run2	2	57	3.70085	1.0649
octyl_10mms_0g_run2	2	58	3.70198	1.06557
octyl_10mms_0g_run2	2	59	3.70311	1.05309
octyl_10mms_0g_run2	2	60	3.70754	1.05804
octyl_10mms_0g_run2	2	61	3.70864	1.06709
octyl_10mms_0g_run2	2	62	3.70975	1.06523
octyl_10mms_0g_run2	2	63	3.71085	1.05896
octyl_10mms_0g_run2	2	64	3.71195	1.08749
octyl_10mms_0g_run2	2	65	3.71656	1.0503
octyl_10mms_0g_run2	2	66	3.7177	1.0561
octyl_10mms_0g_run2	2	67	3.71883	1.04805
octyl_10mms_0g_run2	2	68	3.71996	1.04343
octyl_10mms_0g_run2	2	69	3.7211	1.03463
octyl_10mms_0g_run2	2	70	3.72558	1.04979
octyl_10mms_0g_run2	2	71	3.72671	1.04153
octyl_10mms_0g_run2	2	72	3.72785	1.04282
octyl_10mms_0g_run2	2	73	3.72898	1.06414
octyl_10mms_0g_run2	2	74	3.73011	1.05706
octyl_10mms_0g_run2	2	75	3.73458	1.03569
octyl_10mms_0g_run2	2	76	3.73571	1.02916
octyl_10mms_0g_run2	2	77	3.73685	1.00507
octyl_10mms_0g_run2	2	78	3.73798	1.03042
octyl_10mms_0g_run2	2	79	3.73911	1.02556
octyl_10mms_0g_run2	2	80	3.74358	1.03112
octyl_10mms_0g_run2	2	81	3.74471	1.03863
octyl_10mms_0g_run2	2	82	3.74584	1.05955
octyl_10mms_0g_run2	2	83	3.74698	1.01692
octyl_10mms_0g_run2	2	84	3.74811	1.03871
octyl_10mms_0g_run2	2	85	3.75258	1.03232
octyl_10mms_0g_run2	2	86	3.75372	1.01755
octyl_10mms_0g_run2	2	87	3.75485	1.01324
octyl_10mms_0g_run2	2	88	3.75598	1.01892
octyl_10mms_0g_run2	2	89	3.75711	1.02954
octyl_10mms_0g_run2	2	90	3.76158	1.04017
octyl_10mms_0g_run2	2	91	3.76271	1.04398
octyl_10mms_0g_run2	2	92	3.76384	1.02599
octyl_10mms_0g_run2	2	93	3.76498	1.03177
octyl_10mms_0g_run2	2	94	3.76611	1.0282
octyl_10mms_0g_run2	2	95	3.77058	1.01692
octyl_10mms_0g_run2	2	96	3.77171	1.02082
octyl_10mms_0g_run2	2	97	3.77285	1.0293
octyl_10mms_0g_run2	2	98	3.77398	1.02791
octyl_10mms_0g_run2	2	99	3.77511	1.02523
octyl_10mms_0g_run2	2	100	3.77958	1.03896
octyl_10mms_0g_run2	2	101	3.78071	1.04033
octyl_10mms_0g_run2	2	102	3.78184	1.03204
octyl_10mms_0g_run2	2	103	3.78298	1.01384
octyl_10mms_0g_run2	2	104	3.78411	1.02679
octyl_10mms_0g_run2	2	105	3.78858	1.04437
octyl_10mms_0g_run2	2	106	3.78972	1.02766
octyl_10mms_0g_run2	2	107	3.79085	1.02397
octyl_10mms_0g_run2	2	108	3.79198	1.03202
octyl_10mms_0g_run2	2	109	3.79312	1.03201
octyl_10mms_0g_run2	2	110	3.79758	1.04182
octyl_10mms_0g_run2	2	111	3.79872	1.0186
octyl_10mms_0g_run2	2	112	3.79985	1.01386
octyl_10mms_0g_run2	2	113	3.80098	1.0273
octyl_10mms_0g_run2	2	114	3.80212	1.03265
octyl_10mms_0g_run2	2	115	3.80658	1.02119
octyl_10mms_0g_run2	2	116	3.80771	1.02675
octyl_10mms_0g_run2	2	117	3.80885	1.0275
octyl_10mms_0g_run2	2	118	3.80998	1.03295
octyl_10mms_0g_run2	2	119	3.81111	1.02554
octyl_10mms_0g_run2	2	120	3.81558	1.01702
octyl_10mms_0g_run2	2	121	3.81672	1.0226
octyl_10mms_0g_run2	2	122	3.81785	1.02603
octyl_10mms_0g_run2	2	123	3.81898	1.0235
octyl_10mms_0g_run2	2	124	3.82012	0.989391
octyl_10mms_0g_run2	2	125	3.82458	1.03212
octyl_10mms_0g_run2	2	126	3.82572	1.03132
octyl_10mms_0g_run2	2	127	3.82686	1.02613
octyl_10mms_0g_run2	2	128	3.82799	1.02456
octyl_10mms_0g_run2	2	129	3.82912	1.04405
octyl_10mms_0g_run2	2	130	3.83358	1.02675
octyl_10mms_0g_run2	2	131	3.83472	1.0224
octyl_10mms_0g_run2	2	132	3.83585	1.02428
octyl_10mms_0g_run2	2	133	3.83698	1.0073
octyl_10mms_0g_run2	2	134	3.83812	1.01484
octyl_10mms_0g_run2	2	135	3.84258	1.02571
octyl_10mms_0g_run2	2	136	3.84372	1.02475
octyl_10mms_0g_run2	2	137	3.84485	1.02877
octyl_10mms_0g_run2	2	138	3.84598	1.04658
octyl_10mms_0g_run2	2	139	3.84712	1.01327
octyl_10mms_0g_run2	2	140	3.85155	1.02291
octyl_10mms_0g_run2	2	141	3.85265	1.02642
octyl_10mms_0g_run2	2	142	3.85375	1.01457
octyl_10mms_0g_run2	2	143	3.85485	1.01139
octyl_10mms_0g_run2	2	144	3.85596	1.01639
octyl_10mms_0g_run2	2	145	3.86057	1.02893
octyl_10mms_0g_run2	2	146	3.8617	1.04642
octyl_10mms_0g_run2	2	147	3.86284	1.03557
octyl_10mms_0g_run2	2	148	3.86397	1.03261
octyl_10mms_0g_run2	2	149	3.8651	1.02628
octyl_10mms_0g_run2	2	150	3.86959	1.02932
octyl_10mms_0g_run2	2	151	3.87072	1.013
octyl_10mms_0g_run2	2	152	3.87185	1.033
octyl_10mms_0g_run2	2	153	3.87298	1.02285
octyl_10mms_0g_run2	2	154	3.87411	1.03386
octyl_10mms_0g_run2	2	155	3.87858	1.04711
octyl_10mms_0g_run2	2	156	3.87972	1.04027
octyl_10mms_0g_run2	2	157	3.88085	1.03469
octyl_10mms_0g_run2	2	158	3.88199	1.03226
octyl_10mms_0g_run2	2	159	3.88312	1.02395
octyl_10mms_0g_run2	2	160	3.88758	1.00847
octyl_10mms_0g_run2	2	161	3.88871	1.04288
octyl_10mms_0g_run2	2	162	3.88985	1.03077
octyl_10mms_0g_run2	2	163	3.89098	1.02601
octyl_10mms_0g_run2	2	164	3.89212	1.02822
octyl_10mms_0g_run2	2	165	3.89659	1.03667
octyl_10mms_0g_run2	2	166	3.89772	1.03917
octyl_10mms_0g_run2	2	167	3.89886	1.01792
octyl_10mms_0g_run2	2	168	3.89999	1.02344
octyl_10mms_0g_run2	2	169	3.90112	1.02793
octyl_10mms_0g_run2	2	170	3.90559	1.02364
octyl_10mms_0g_run2	2	171	3.90672	1.02278
octyl_10mms_0g_run2	2	172	3.90785	1.02654
octyl_10mms_0g_run2	2	173	3.90899	1.02999
octyl_10mms_0g_run2	2	174	3.91012	1.03196
octyl_10mms_0g_run2	2	175	3.91458	1.03163
octyl_10mms_0g_run2	2	176	3.91572	1.01917
octyl_10mms_0g_run2	2	177	3.91685	1.0216
octyl_10mms_0g_run2	2	178	3.91799	1.02699
octyl_10mms_0g_run2	2	179	3.91912	1.0158
octyl_10mms_0g_run2	2	180	3.92358	1.01933
octyl_10mms_0g_run2	2	181	3.92472	1.01578
octyl_10mms_0g_run2	2	182	3.92585	1.02912
octyl_10mms_0g_run2	2	183	3.92699	1.01386
octyl_10mms_0g_run2	2	184	3.92812	1.02374
octyl_10mms_0g_run2	2	185	3.93259	1.01333
octyl_10mms_0g_run2	2	186	3.93372	1.02683
octyl_10mms_0g_run2	2	187	3.93486	1.01225
octyl_10mms_0g_run2	2	188	3.93599	1.0197
octyl_10mms_0g_run2	2	189	3.93712	1.00847
octyl_10mms_0g_run2	2	190	3.94159	1.02597
octyl_10mms_0g_run2	2	191	3.94272	1.0158
octyl_10mms_0g_run2	2	192	3.94386	1.01611
octyl_10mms_0g_run2	2	193	3.94499	1.03612
octyl_10mms_0g_run2	2	194	3.94613	1.036
octyl_10mms_0g_run2	2	195	3.95058	1.01494
octyl_10mms_0g_run2	2	196	3.95172	1.01478
octyl_10mms_0g_run2	2	197	3.95285	1.02231
octyl_10mms_0g_run2	2	198	3.95398	1.01175
octyl_10mms_0g_run2	2	199	3.95512	1.01557
octyl_10mms_0g_run2	2	200	3.95959	1.01292
octyl_10mms_0g_run2	2	201	3.96072	1.02076
octyl_10mms_0g_run2	2	202	3.96185	1.05259
octyl_10mms_0g_run2	2	203	3.96299	1.02566
octyl_10mms_0g_run2	2	204	3.96412	1.02748
octyl_10mms_0g_run2	2	205	3.96859	1.01696
octyl_10mms_0g_run2	2	206	3.96972	1.02381
octyl_10mms_0g_run2	2	207	3.97085	0.999166
octyl_10mms_0g_run2	2	208	3.97199	1.03308
octyl_10mms_0g_run2	2	209	3.97312	1.01694
octyl_10mms_0g_run2	2	210	3.97759	1.02603
octyl_10mms_0g_run2	2	211	3.97873	1.02842
octyl_10mms_0g_run2	2	212	3.97986	1.02699
octyl_10mms_0g_run2	2	213	3.98099	1.02132
octyl_10mms_0g_run2	2	214	3.98213	1.01241
octyl_10mms_0g_run2	2	215	3.98659	1.00857
octyl_10mms_0g_run2	2	216	3.98772	0.998794
octyl_10mms_0g_run2	2	217	3.98885	1.01572
octyl_10mms_0g_run2	2	218	3.98999	1.01639
octyl_10mms_0g_run2	2	219	3.99112	1.01425
octyl_10mms_0g_run2	2	220	3.99556	1.03016
octyl_10mms_0g_run2	2	221	3.99666	1.0282
octyl_10mms_0g_run2	2	222	3.99776	1.02134
octyl_10mms_0g_run2	2	223	3.99886	1.00397
octyl_10mms_0g_run2	2	224	3.99997	1.01339
octyl_10mms_0g_run2	2	225	4.00458	1.00134
octyl_10mms_0g_run2	2	226	4.00571	1.01141
octyl_10mms_0g_run2	2	227	4.00685	1.00667
octyl_10mms_0g_run2	2	228	4.00798	1.00873
octyl_10mms_0g_run2	2	229	4.00912	1.02191
octyl_10mms_0g_run2	2	230	4.01359	1.00573
octyl_10mms_0g_run2	2	231	4.01472	1.01245
octyl_10mms_0g_run2	2	232	4.01586	1.00898
octyl_10mms_0g_run2	2	233	4.01699	1.0158
octyl_10mms_0g_run2	2	234	4.01812	1.01731
octyl_10mms_0g_run2	2	235	4.02259	1.00369
octyl_10mms_0g_run2	2	236	4.02372	1.00984
octyl_10mms_0g_run2	2	237	4.02485	1.01974
octyl_10mms_0g_run2	2	238	4.02599	1.01942
octyl_10mms_0g_run2	2	239	4.02712	1.01069
octyl_10mms_0g_run2	2	240	4.03159	1.00998
octyl_10mms_0g_run2	2	241	4.03272	1.01235
octyl_10mms_0g_run2	2	242	4.03385	1.01837
octyl_10mms_0g_run2	2	243	4.03499	1.01114
octyl_10mms_0g_run2	2	244	4.03612	1.01707
octyl_10mms_0g_run2	2	245	4.04059	0.969563
octyl_10mms_0g_run2	2	246	4.04173	0.944838
octyl_10mms_0g_run2	2	247	4.04286	0.919918
octyl_10mms_0g_run2	2	248	4.044	0.899366
octyl_10mms_0g_run2	2	249	4.04513	0.909632
octyl_10mms_0g_run2	2	250	4.04959	0.827405
octyl_10mms_0g_run2	2	251	4.05072	0.81181
octyl_10mms_0g_run2	2	252	4.05186	0.819784
octyl_10mms_0g_run2	2	253	4.053	0.815944
octyl_10mms_0g_run2	2	254	4.05413	0.80366
octyl_10mms_0g_run2	2	255	4.05859	0.825603
octyl_10mms_0g_run2	2	256	4.05972	0.828306
octyl_10mms_0g_run2	2	257	4.06086	0.819999
octyl_10mms_0g_run2	2	258	4.06199	0.833714
octyl_10mms_0g_run2	2	259	4.06313	0.825544
octyl_10mms_0g_run2	2	260	4.06759	0.783872
octyl_10mms_0g_run2	2	261	4.06872	0.780483
octyl_10mms_0g_run2	2	262	4.06986	0.775115
octyl_10mms_0g_run2	2	263	4.07099	0.764183
octyl_10mms_0g_run2	2	264	4.07213	0.76814
octyl_10mms_0g_run2	2	265	4.0766	0.782344
octyl_10mms_0g_run2	2	266	4.07773	0.778955
octyl_10mms_0g_run2	2	267	4.07886	0.794609
octyl_10mms_0g_run2	2	268	4.08	0.784911
octyl_10mms_0g_run2	3	1	4.56261	0.599849
octyl_10mms_0g_run2	3	2	4.56375	0.595324
octyl_10mms_0g_run2	3	3	4.56488	0.58255
octyl_10mms_0g_run2	3	4	4.56601	0.578867
octyl_10mms_0g_run2	3	5	4.56715	0.583549
octyl_10mms_0g_run2	3	6	4.57158	0.590014
octyl_10mms_0g_run2	3	7	4.57268	0.576947
octyl_10mms_0g_run2	3	8	4.57379	0.582981
octyl_10mms_0g_run2	3	9	4.57489	0.587507
octyl_10mms_0g_run2	3	10	4.57599	0.583823
octyl_10mms_0g_run2	3	11	4.5806	0.594364
octyl_10mms_0g_run2	3	12	4.58174	0.579709
octyl_10mms_0g_run2	3	13	4.58287	0.587487
octyl_10mms_0g_run2	3	14	4.584	0.582334
octyl_10mms_0g_run2	3	15	4.58514	0.580062
octyl_10mms_0g_run2	3	16	4.58962	0.578142
octyl_10mms_0g_run2	3	17	4.59075	0.586155
octyl_10mms_0g_run2	3	18	4.59189	0.581022
octyl_10mms_0g_run2	3	19	4.59302	0.584979
octyl_10mms_0g_run2	3	20	4.59416	0.581962
octyl_10mms_0g_run2	3	21	4.59862	0.62622
octyl_10mms_0g_run2	3	22	4.59975	0.652532
octyl_10mms_0g_run2	3	23	4.60089	0.691637
octyl_10mms_0g_run2	3	24	4.60202	0.729979
octyl_10mms_0g_run2	3	25	4.60316	0.725923
octyl_10mms_0g_run2	3	26	4.60761	0.8912
octyl_10mms_0g_run2	3	27	4.60875	0.908891
octyl_10mms_0g_run2	3	28	4.60988	0.926308
octyl_10mms_0g_run2	3	29	4.61102	0.936477
octyl_10mms_0g_run2	3	30	4.61215	0.961574
octyl_10mms_0g_run2	3	31	4.61662	0.973721
octyl_10mms_0g_run2	3	32	4.61775	0.98622
octyl_10mms_0g_run2	3	33	4.61889	1.00256
octyl_10mms_0g_run2	3	34	4.62002	0.995703
octyl_10mms_0g_run2	3	35	4.62115	1.00244
octyl_10mms_0g_run2	3	36	4.62562	1.04276
octyl_10mms_0g_run2	3	37	4.62675	1.05319
octyl_10mms_0g_run2	3	38	4.62788	1.05491
octyl_10mms_0g_run2	3	39	4.62902	1.06684
octyl_10mms_0g_run2	3	40	4.63015	1.03724
octyl_10mms_0g_run2	3	41	4.63462	1.06173
octyl_10mms_0g_run2	3	42	4.63575	1.06617
octyl_10mms_0g_run2	3	43	4.63688	1.05025
octyl_10mms_0g_run2	3	44	4.63802	1.06298
octyl_10mms_0g_run2	3	45	4.63915	1.07164
octyl_10mms_0g_run2	3	46	4.64362	1.08483
octyl_10mms_0g_run2	3	47	4.64475	1.09043
octyl_10mms_0g_run2	3	48	4.64588	1.09311
octyl_10mms_0g_run2	3	49	4.64702	1.09174
octyl_10mms_0g_run2	3	50	4.64815	1.08349
octyl_10mms_0g_run2	3	51	4.65262	1.07364
octyl_10mms_0g_run2	3	52	4.65375	1.05773
octyl_10mms_0g_run2	3	53	4.65488	1.07709
octyl_10mms_0g_run2	3	54	4.65602	1.07266
octyl_10mms_0g_run2	3	55	4.65715	1.06962
octyl_10mms_0g_run2	3	56	4.66162	1.09194
octyl_10mms_0g_run2	3	57	4.66275	1.08132
octyl_10mms_0g_run2	3	58	4.66389	1.0813
octyl_10mms_0g_run2	3	59	4.66502	1.05996
octyl_10mms_0g_run2	3	60	4.66616	1.06945
octyl_10mms_0g_run2	3	61	4.67062	1.04648
octyl_10mms_0g_run2	3	62	4.67175	1.07225
octyl_10mms_0g_run2	3	63	4.67289	1.05066
octyl_10mms_0g_run2	3	64	4.67402	1.05185
octyl_10mms_0g_run2	3	65	4.67516	1.05364
octyl_10mms_0g_run2	3	66	4.67962	1.06306
octyl_10mms_0g_run2	3	67	4.68076	1.05164
octyl_10mms_0g_run2	3	68	4.68189	1.03914
octyl_10mms_0g_run2	3	69	4.68303	1.04125
octyl_10mms_0g_run2	3	70	4.68416	1.04621
octyl_10mms_0g_run2	3	71	4.68862	1.0341
octyl_10mms_0g_run2	3	72	4.68976	1.03356
octyl_10mms_0g_run2	3	73	4.69089	1.03751
octyl_10mms_0g_run2	3	74	4.69202	1.04396
octyl_10mms_0g_run2	3	75	4.69315	1.0313
octyl_10mms_0g_run2	3	76	4.69762	1.03636
octyl_10mms_0g_run2	3	77	4.69876	1.02421
octyl_10mms_0g_run2	3	78	4.69989	1.03577
octyl_10mms_0g_run2	3	79	4.70103	1.02196
octyl_10mms_0g_run2	3	80	4.70216	1.02537
octyl_10mms_0g_run2	3	81	4.70662	1.02689
octyl_10mms_0g_run2	3	82	4.70775	1.0293
octyl_10mms_0g_run2	3	83	4.70889	1.0276
octyl_10mms_0g_run2	3	84	4.71002	1.02431
octyl_10mms_0g_run2	3	85	4.71115	1.03238
octyl_10mms_0g_run2	3	86	4.71559	1.02517
octyl_10mms_0g_run2	3	87	4.71669	1.02049
octyl_10mms_0g_run2	3	88	4.71779	1.02041
octyl_10mms_0g_run2	3	89	4.7189	1.02239
octyl_10mms_0g_run2	3	90	4.72	1.01195
octyl_10mms_0g_run2	3	91	4.72461	1.02458
octyl_10mms_0g_run2	3	92	4.72574	1.02206
octyl_10mms_0g_run2	3	93	4.72687	1.02727
octyl_10mms_0g_run2	3	94	4.728	1.03516
octyl_10mms_0g_run2	3	95	4.72914	1.03636
octyl_10mms_0g_run2	3	96	4.73362	1.01465
octyl_10mms_0g_run2	3	97	4.73476	1.02033
octyl_10mms_0g_run2	3	98	4.73589	1.02652
octyl_10mms_0g_run2	3	99	4.73703	1.00221
octyl_10mms_0g_run2	3	100	4.73816	1.0163
octyl_10mms_0g_run2	3	101	4.74263	1.01775
octyl_10mms_0g_run2	3	102	4.74376	1.02991
octyl_10mms_0g_run2	3	103	4.74489	1.05215
octyl_10mms_0g_run2	3	104	4.74602	1.03144
octyl_10mms_0g_run2	3	105	4.74716	1.03238
octyl_10mms_0g_run2	3	106	4.75162	1.02443
octyl_10mms_0g_run2	3	107	4.75276	1.01968
octyl_10mms_0g_run2	3	108	4.75389	0.999015
octyl_10mms_0g_run2	3	109	4.75502	1.0408
octyl_10mms_0g_run2	3	110	4.75616	1.01534
octyl_10mms_0g_run2	3	111	4.76063	1.02249
octyl_10mms_0g_run2	3	112	4.76176	1.03132
octyl_10mms_0g_run2	3	113	4.76289	1.03359
octyl_10mms_0g_run2	3	114	4.76403	1.03216
octyl_10mms_0g_run2	3	115	4.76516	1.00899
octyl_10mms_0g_run2	3	116	4.76962	1.01273
octyl_10mms_0g_run2	3	117	4.77076	1.00993
octyl_10mms_0g_run2	3	118	4.77189	1.02121
octyl_10mms_0g_run2	3	119	4.77303	1.0143
octyl_10mms_0g_run2	3	120	4.77416	1.02237
octyl_10mms_0g_run2	3	121	4.77862	1.03702
octyl_10mms_0g_run2	3	122	4.77976	1.03689
octyl_10mms_0g_run2	3	123	4.78089	1.01422
octyl_10mms_0g_run2	3	124	4.78203	1.01246
octyl_10mms_0g_run2	3	125	4.78316	1.02008
octyl_10mms_0g_run2	3	126	4.78762	1.00848
octyl_10mms_0g_run2	3	127	4.78876	1.00695
octyl_10mms_0g_run2	3	128	4.78989	1.0084
octyl_10mms_0g_run2	3	129	4.79102	1.00366
octyl_10mms_0g_run2	3	130	4.79215	1.0228
octyl_10mms_0g_run2	3	131	4.79663	1.0019
octyl_10mms_0g_run2	3	132	4.79776	1.01622
octyl_10mms_0g_run2	3	133	4.7989	1.0112
octyl_10mms_0g_run2	3	134	4.80003	1.02153
octyl_10mms_0g_run2	3	135	4.80117	1.01236
octyl_10mms_0g_run2	3	136	4.80562	1.00152
octyl_10mms_0g_run2	3	137	4.80676	1.01463
octyl_10mms_0g_run2	3	138	4.80789	1.0268
octyl_10mms_0g_run2	3	139	4.80903	1.01167
octyl_10mms_0g_run2	3	140	4.81016	1.01731
octyl_10mms_0g_run2	3	141	4.81462	1.01457
octyl_10mms_0g_run2	3	142	4.81576	1.01555
octyl_10mms_0g_run2	3	143	4.81689	1.0086
octyl_10mms_0g_run2	3	144	4.81803	1.01439
octyl_10mms_0g_run2	3	145	4.81916	1.01375
octyl_10mms_0g_run2	3	146	4.82363	1.01675
octyl_10mms_0g_run2	3	147	4.82477	1.01263
octyl_10mms_0g_run2	3	148	4.8259	1.01569
octyl_10mms_0g_run2	3	149	4.82704	1.01518
octyl_10mms_0g_run2	3	150	4.82817	1.05225
octyl_10mms_0g_run2	3	151	4.83263	1.00233
octyl_10mms_0g_run2	3	152	4.83376	1.00754
octyl_10mms_0g_run2	3	153	4.83489	1.01255
octyl_10mms_0g_run2	3	154	4.83602	1.01445
octyl_10mms_0g_run2	3	155	4.83716	0.988788
octyl_10mms_0g_run2	3	156	4.84163	1.00999
octyl_10mms_0g_run2	3	157	4.84276	1.01318
octyl_10mms_0g_run2	3	158	4.8439	1.01775
octyl_10mms_0g_run2	3	159	4.84503	1.02427
octyl_10mms_0g_run2	3	160	4.84616	1.02666
octyl_10mms_0g_run2	3	161	4.85063	1.01518
octyl_10mms_0g_run2	3	162	4.85176	1.01753
octyl_10mms_0g_run2	3	163	4.85289	1.00807
octyl_10mms_0g_run2	3	164	4.85403	0.998702
octyl_10mms_0g_run2	3	165	4.85516	1.01377
octyl_10mms_0g_run2	3	166	4.85959	1.01651
octyl_10mms_0g_run2	3	167	4.8607	1.01682
octyl_10mms_0g_run2	3	168	4.8618	1.02541
octyl_10mms_0g_run2	3	169	4.86291	1.02635
octyl_10mms_0g_run2	3	170	4.86401	1.02315
octyl_10mms_0g_run2	3	171	4.86862	1.01054
octyl_10mms_0g_run2	3	172	4.86975	0.974624
octyl_10mms_0g_run2	3	173	4.87088	0.999721
octyl_10mms_0g_run2	3	174	4.87202	1.00852
octyl_10mms_0g_run2	3	175	4.87315	1.00581
octyl_10mms_0g_run2	3	176	4.87763	1.00856
octyl_10mms_0g_run2	3	177	4.87876	1.02827
octyl_10mms_0g_run2	3	178	4.87989	1.00685
octyl_10mms_0g_run2	3	179	4.88103	1.01755
octyl_10mms_0g_run2	3	180	4.88216	1.00495
octyl_10mms_0g_run2	3	181	4.88663	0.99159
octyl_10mms_0g_run2	3	182	4.88777	1.00517
octyl_10mms_0g_run2	3	183	4.8889	1.00534
octyl_10mms_0g_run2	3	184	4.89004	1.00912
octyl_10mms_0g_run2	3	185	4.89117	1.01089
octyl_10mms_0g_run2	3	186	4.89563	1.0313
octyl_10mms_0g_run2	3	187	4.89676	1.00456
octyl_10mms_0g_run2	3	188	4.8979	1.00903
octyl_10mms_0g_run2	3	189	4.89903	1.00215
octyl_10mms_0g_run2	3	190	4.90016	1.01044
octyl_10mms_0g_run2	3	191	4.90463	0.999858
octyl_10mms_0g_run2	3	192	4.90577	1.00474
octyl_10mms_0g_run2	3	193	4.9069	1.00481
octyl_10mms_0g_run2	3	194	4.90804	1.0171
octyl_10mms_0g_run2	3	195	4.90917	1.00225
octyl_10mms_0g_run2	3	196	4.91363	1.01653
octyl_10mms_0g_run2	3	197	4.91477	1.0055
octyl_10mms_0g_run2	3	198	4.9159	1.00415
octyl_10mms_0g_run2	3	199	4.91703	1.00413
octyl_10mms_0g_run2	3	200	4.91817	1.00431
octyl_10mms_0g_run2	3	201	4.92263	0.999505
octyl_10mms_0g_run2	3	202	4.92376	1.00864
octyl_10mms_0g_run2	3	203	4.92489	1.00605
octyl_10mms_0g_run2	3	204	4.92603	1.00303
octyl_10mms_0g_run2	3	205	4.92716	1.00587
octyl_10mms_0g_run2	3	206	4.93163	1.00566
octyl_10mms_0g_run2	3	207	4.93276	1.01283
octyl_10mms_0g_run2	3	208	4.9339	1.00223
octyl_10mms_0g_run2	3	209	4.93503	1.00464
octyl_10mms_0g_run2	3	210	4.93617	1.01414
octyl_10mms_0g_run2	3	211	4.94063	1.01032
octyl_10mms_0g_run2	3	212	4.94177	1.00456
octyl_10mms_0g_run2	3	213	4.9429	1.00521
octyl_10mms_0g_run2	3	214	4.94404	1.01461
octyl_10mms_0g_run2	3	215	4.94517	1.018
octyl_10mms_0g_run2	3	216	4.94963	1.00113
octyl_10mms_0g_run2	3	217	4.95077	1.0005
octyl_10mms_0g_run2	3	218	4.9519	1.01304
octyl_10mms_0g_run2	3	219	4.95303	0.977347
octyl_10mms_0g_run2	3	220	4.95416	0.993902
octyl_10mms_0g_run2	3	221	4.95863	1.00619
octyl_10mms_0g_run2	3	222	4.95976	1.01416
octyl_10mms_0g_run2	3	223	4.9609	1.00989
octyl_10mms_0g_run2	3	224	4.96203	1.01959
octyl_10mms_0g_run2	3	225	4.96316	1.00274
octyl_10mms_0g_run2	3	226	4.96763	1.00801
octyl_10mms_0g_run2	3	227	4.96876	1.00591
octyl_10mms_0g_run2	3	228	4.9699	0.983734
octyl_10mms_0g_run2	3	229	4.97103	0.992922
octyl_10mms_0g_run2	3	230	4.97216	1.00321
octyl_10mms_0g_run2	3	231	4.97664	1.00922
octyl_10mms_0g_run2	3	232	4.97777	1.00556
octyl_10mms_0g_run2	3	233	4.9789	1.02431
octyl_10mms_0g_run2	3	234	4.98004	0.998388
octyl_10mms_0g_run2	3	235	4.98117	1.00043
octyl_10mms_0g_run2	3	236	4.98564	1.00062
octyl_10mms_0g_run2	3	237	4.98677	0.986574
octyl_10mms_0g_run2	3	238	4.9879	0.999289
octyl_10mms_0g_run2	3	239	4.98904	0.994998
octyl_10mms_0g_run2	3	240	4.99017	1.00297
octyl_10mms_0g_run2	3	241	4.99463	1.01006
octyl_10mms_0g_run2	3	242	4.99576	1.00754
octyl_10mms_0g_run2	3	243	4.99689	0.977346
octyl_10mms_0g_run2	3	244	4.99803	0.960673
octyl_10mms_0g_run2	3	245	4.99916	0.945196
octyl_10mms_0g_run2	3	246	5.0036	0.846531
octyl_10mms_0g_run2	3	247	5.00471	0.837813
octyl_10mms_0g_run2	3	248	5.00581	0.836363
octyl_10mms_0g_run2	3	249	5.00691	0.827762
octyl_10mms_0g_run2	3	250	5.00801	0.814753
octyl_10mms_0g_run2	3	251	5.01262	0.825881
octyl_10mms_0g_run2	3	252	5.01376	0.832973
octyl_10mms_0g_run2	3	253	5.01489	0.817437
octyl_10mms_0g_run2	3	254	5.01602	0.825195
octyl_10mms_0g_run2	3	255	5.01716	0.818534
octyl_10mms_0g_run2	3	256	5.02164	0.817809
octyl_10mms_0g_run2	3	257	5.02277	0.789558
octyl_10mms_0g_run2	3	258	5.0239	0.788422
octyl_10mms_0g_run2	3	259	5.02504	0.783622
octyl_10mms_0g_run2	3	260	5.02617	0.77986
octyl_10mms_0g_run2	3	261	5.03064	0.783661
octyl_10mms_0g_run2	3	262	5.03177	0.775021
octyl_10mms_0g_run2	3	263	5.03291	0.773316
octyl_10mms_0g_run2	3	264	5.03404	0.777019
octyl_10mms_0g_run2	3	265	5.03517	0.775021
octyl_10mms_0g_run2	3	266	5.03963	0.76401
octyl_10mms_0g_run2	3	267	5.04077	0.763853
octyl_10mms_0g_run2	3	268	5.0419	0.76111
octyl_10mms_0g_run3	1	1	2.64115	0.482313
octyl_10mms_0g_run3	1	2	2.64562	0.481863
octyl_10mms_0g_run3	1	3	2.64676	0.477611
octyl_10mms_0g_run3	1	4	2.64789	0.48294
octyl_10mms_0g_run3	1	5	2.64902	0.479022
octyl_10mms_0g_run3	1	6	2.65016	0.483645
octyl_10mms_0g_run3	1	7	2.65463	0.482391
octyl_10mms_0g_run3	1	8	2.65576	0.483998
octyl_10mms_0g_run3	1	9	2.65689	0.478943
octyl_10mms_0g_run3	1	10	2.65803	0.485526
octyl_10mms_0g_run3	1	11	2.65916	0.518322
octyl_10mms_0g_run3	1	12	2.66363	0.474084
octyl_10mms_0g_run3	1	13	2.66476	0.476866
octyl_10mms_0g_run3	1	14	2.66589	0.481313
octyl_10mms_0g_run3	1	15	2.66702	0.478688
octyl_10mms_0g_run3	1	16	2.66816	0.463034
octyl_10mms_0g_run3	1	17	2.67263	0.485369
octyl_10mms_0g_run3	1	18	2.67376	0.504059
octyl_10mms_0g_run3	1	19	2.67489	0.515285
octyl_10mms_0g_run3	1	20	2.67603	0.541303
octyl_10mms_0g_run3	1	21	2.67717	0.561992
octyl_10mms_0g_run3	1	22	2.68159	0.67915
octyl_10mms_0g_run3	1	23	2.68269	0.707519
octyl_10mms_0g_run3	1	24	2.6838	0.737298
octyl_10mms_0g_run3	1	25	2.6849	0.75399
octyl_10mms_0g_run3	1	26	2.686	0.818016
octyl_10mms_0g_run3	1	27	2.69061	0.848402
octyl_10mms_0g_run3	1	28	2.69174	0.863586
octyl_10mms_0g_run3	1	29	2.69288	0.887801
octyl_10mms_0g_run3	1	30	2.69401	0.895422
octyl_10mms_0g_run3	1	31	2.69515	0.889212
octyl_10mms_0g_run3	1	32	2.69963	0.936232
octyl_10mms_0g_run3	1	33	2.70076	0.926397
octyl_10mms_0g_run3	1	34	2.7019	0.958331
octyl_10mms_0g_run3	1	35	2.70303	0.950181
octyl_10mms_0g_run3	1	36	2.70416	0.966991
octyl_10mms_0g_run3	1	37	2.70863	0.963111
octyl_10mms_0g_run3	1	38	2.70976	0.9771
octyl_10mms_0g_run3	1	39	2.7109	0.949084
octyl_10mms_0g_run3	1	40	2.71203	0.957782
octyl_10mms_0g_run3	1	41	2.71316	0.953923
octyl_10mms_0g_run3	1	42	2.71762	0.943481
octyl_10mms_0g_run3	1	43	2.71876	0.945361
octyl_10mms_0g_run3	1	44	2.71989	0.949123
octyl_10mms_0g_run3	1	45	2.72102	0.961857
octyl_10mms_0g_run3	1	46	2.72216	0.953198
octyl_10mms_0g_run3	1	47	2.72663	0.980039
octyl_10mms_0g_run3	1	48	2.72776	0.944617
octyl_10mms_0g_run3	1	49	2.7289	0.965306
octyl_10mms_0g_run3	1	50	2.73003	0.956176
octyl_10mms_0g_run3	1	51	2.73117	0.954961
octyl_10mms_0g_run3	1	52	2.73563	0.947967
octyl_10mms_0g_run3	1	53	2.73676	0.962034
octyl_10mms_0g_run3	1	54	2.7379	0.968068
octyl_10mms_0g_run3	1	55	2.73903	0.955451
octyl_10mms_0g_run3	1	56	2.74016	0.966011
octyl_10mms_0g_run3	1	57	2.74463	0.972261
octyl_10mms_0g_run3	1	58	2.74576	0.969459
octyl_10mms_0g_run3	1	59	2.74689	0.949123
octyl_10mms_0g_run3	1	60	2.74803	0.959291
octyl_10mms_0g_run3	1	61	2.74916	0.966795
octyl_10mms_0g_run3	1	62	2.75363	0.957097
octyl_10mms_0g_run3	1	63	2.75476	0.954393
octyl_10mms_0g_run3	1	64	2.7559	0.960995
octyl_10mms_0g_run3	1	65	2.75703	0.962994
octyl_10mms_0g_run3	1	66	2.75816	0.965482
octyl_10mms_0g_run3	1	67	2.76263	0.950279
octyl_10mms_0g_run3	1	68	2.76376	0.956529
octyl_10mms_0g_run3	1	69	2.7649	0.959193
octyl_10mms_0g_run3	1	70	2.76603	0.958429
octyl_10mms_0g_run3	1	71	2.76716	0.950083
octyl_10mms_0g_run3	1	72	2.77163	0.95069
octyl_10mms_0g_run3	1	73	2.77277	0.959683
octyl_10mms_0g_run3	1	74	2.7739	0.962093
octyl_10mms_0g_run3	1	75	2.77503	0.949965
octyl_10mms_0g_run3	1	76	2.77616	0.975787
octyl_10mms_0g_run3	1	77	2.78063	0.953609
octyl_10mms_0g_run3	1	78	2.78176	0.959506
octyl_10mms_0g_run3	1	79	2.78289	0.945792
octyl_10mms_0g_run3	1	80	2.78403	0.946674
octyl_10mms_0g_run3	1	81	2.78516	0.94158
octyl_10mms_0g_run3	1	82	2.78964	0.959722
octyl_10mms_0g_run3	1	83	2.79077	0.949965
octyl_10mms_0g_run3	1	84	2.7919	0.955745
octyl_10mms_0g_run3	1	85	2.79304	0.969812
octyl_10mms_0g_run3	1	86	2.79417	0.96519
octyl_10mms_0g_run3	1	87	2.79863	0.946754
octyl_10mms_0g_run3	1	88	2.79977	0.948831
octyl_10mms_0g_run3	1	89	2.8009	0.916152
octyl_10mms_0g_run3	1	90	2.80204	0.937958
octyl_10mms_0g_run3	1	91	2.80317	0.933961
octyl_10mms_0g_run3	1	92	2.80763	0.942189
octyl_10mms_0g_run3	1	93	2.80876	0.950242
octyl_10mms_0g_run3	1	94	2.8099	0.962741
octyl_10mms_0g_run3	1	95	2.81103	0.919365
octyl_10mms_0g_run3	1	96	2.81216	0.946989
octyl_10mms_0g_run3	1	97	2.81663	0.946735
octyl_10mms_0g_run3	1	98	2.81777	0.928377
octyl_10mms_0g_run3	1	99	2.8189	0.92538
octyl_10mms_0g_run3	1	100	2.82003	0.935293
octyl_10mms_0g_run3	1	101	2.82117	0.943561
octyl_10mms_0g_run3	1	102	2.8256	0.947499
octyl_10mms_0g_run3	1	103	2.8267	0.958157
octyl_10mms_0g_run3	1	104	2.8278	0.928514
octyl_10mms_0g_run3	1	105	2.8289	0.946441
octyl_10mms_0g_run3	1	106	2.83001	0.939936
octyl_10mms_0g_run3	1	107	2.83462	0.919561
octyl_10mms_0g_run3	1	108	2.83575	0.924655
octyl_10mms_0g_run3	1	109	2.83688	0.939701
octyl_10mms_0g_run3	1	110	2.83802	0.942346
octyl_10mms_0g_run3	1	111	2.83915	0.935215
octyl_10mms_0g_run3	1	112	2.84363	0.950888
octyl_10mms_0g_run3	1	113	2.84477	0.951535
octyl_10mms_0g_run3	1	114	2.8459	0.944247
octyl_10mms_0g_run3	1	115	2.84704	0.94938
octyl_10mms_0g_run3	1	116	2.84817	0.937801
octyl_10mms_0g_run3	1	117	2.85263	0.962722
octyl_10mms_0g_run3	1	118	2.85377	0.938624
octyl_10mms_0g_run3	1	119	2.8549	0.941308
octyl_10mms_0g_run3	1	120	2.85604	0.942268
octyl_10mms_0g_run3	1	121	2.85717	0.945736
octyl_10mms_0g_run3	1	122	2.86163	0.956511
octyl_10mms_0g_run3	1	123	2.86277	0.940642
octyl_10mms_0g_run3	1	124	2.8639	0.941151
octyl_10mms_0g_run3	1	125	2.86504	0.943639
octyl_10mms_0g_run3	1	126	2.86617	0.947989
octyl_10mms_0g_run3	1	127	2.87064	0.941092
octyl_10mms_0g_run3	1	128	2.87177	0.944697
octyl_10mms_0g_run3	1	129	2.87291	0.943051
octyl_10mms_0g_run3	1	130	2.87404	0.951143
octyl_10mms_0g_run3	1	131	2.87517	0.937997
octyl_10mms_0g_run3	1	132	2.87963	0.939701
octyl_10mms_0g_run3	1	133	2.88077	0.940994
octyl_10mms_0g_run3	1	134	2.8819	0.948302
octyl_10mms_0g_run3	1	135	2.88304	0.936488
octyl_10mms_0g_run3	1	136	2.88417	0.905181
octyl_10mms_0g_run3	1	137	2.88863	0.948165
octyl_10mms_0g_run3	1	138	2.88977	0.947283
octyl_10mms_0g_run3	1	139	2.8909	0.938683
octyl_10mms_0g_run3	1	140	2.89203	0.942248
octyl_10mms_0g_run3	1	141	2.89316	0.959234
octyl_10mms_0g_run3	1	142	2.89763	0.941073
octyl_10mms_0g_run3	1	143	2.89877	0.939035
octyl_10mms_0g_run3	1	144	2.8999	0.938722
octyl_10mms_0g_run3	1	145	2.90103	0.922069
octyl_10mms_0g_run3	1	146	2.90217	0.932942
octyl_10mms_0g_run3	1	147	2.90664	0.937389
octyl_10mms_0g_run3	1	148	2.90777	0.937174
octyl_10mms_0g_run3	1	149	2.9089	0.939936
octyl_10mms_0g_run3	1	150	2.91003	0.962153
octyl_10mms_0g_run3	1	151	2.91117	0.929318
octyl_10mms_0g_run3	1	152	2.91564	0.934196
octyl_10mms_0g_run3	1	153	2.91677	0.934725
octyl_10mms_0g_run3	1	154	2.9179	0.928573
octyl_10mms_0g_run3	1	155	2.91903	0.925556
octyl_10mms_0g_run3	1	156	2.92017	0.936057
octyl_10mms_0g_run3	1	157	2.92463	0.937723
octyl_10mms_0g_run3	1	158	2.92577	0.964975
octyl_10mms_0g_run3	1	159	2.9269	0.950594
octyl_10mms_0g_run3	1	160	2.92803	0.948753
octyl_10mms_0g_run3	1	161	2.92917	0.9407
octyl_10mms_0g_run3	1	162	2.93364	0.942816
octyl_10mms_0g_run3	1	163	2.93477	0.925419
octyl_10mms_0g_run3	1	164	2.9359	0.941621
octyl_10mms_0g_run3	1	165	2.93704	0.931492
octyl_10mms_0g_run3	1	166	2.93817	0.938859
octyl_10mms_0g_run3	1	167	2.94264	0.964583
octyl_10mms_0g_run3	1	168	2.94377	0.949791
octyl_10mms_0g_run3	1	169	2.94491	0.951966
octyl_10mms_0g_run3	1	170	2.94604	0.937468
octyl_10mms_0g_run3	1	171	2.94718	0.937957
octyl_10mms_0g_run3	1	172	2.95164	0.919835
octyl_10mms_0g_run3	1	173	2.95277	0.953592
octyl_10mms_0g_run3	1	174	2.9539	0.938878
octyl_10mms_0g_run3	1	175	2.95504	0.932315
octyl_10mms_0g_run3	1	176	2.95617	0.935763
octyl_10mms_0g_run3	1	177	2.96064	0.946656
octyl_10mms_0g_run3	1	178	2.96177	0.946225
octyl_10mms_0g_run3	1	179	2.96291	0.924851
octyl_10mms_0g_run3	1	180	2.96404	0.932256
octyl_10mms_0g_run3	1	181	2.96518	0.934215
octyl_10mms_0g_run3	1	182	2.9696	0.932903
octyl_10mms_0g_run3	1	183	2.97071	0.930983
octyl_10mms_0g_run3	1	184	2.97182	0.934823
octyl_10mms_0g_run3	1	185	2.97292	0.939603
octyl_10mms_0g_run3	1	186	2.97402	0.938545
octyl_10mms_0g_run3	1	187	2.97863	0.936214
octyl_10mms_0g_run3	1	188	2.97976	0.926692
octyl_10mms_0g_run3	1	189	2.9809	0.931923
octyl_10mms_0g_run3	1	190	2.98203	0.936625
octyl_10mms_0g_run3	1	191	2.98317	0.929082
octyl_10mms_0g_run3	1	192	2.98764	0.924772
octyl_10mms_0g_run3	1	193	2.98877	0.932413
octyl_10mms_0g_run3	1	194	2.98991	0.940367
octyl_10mms_0g_run3	1	195	2.99104	0.93255
octyl_10mms_0g_run3	1	196	2.99218	0.938898
octyl_10mms_0g_run3	1	197	2.99664	0.928279
octyl_10mms_0g_run3	1	198	2.99777	0.938624
octyl_10mms_0g_run3	1	199	2.9989	0.927985
octyl_10mms_0g_run3	1	200	3.00004	0.935097
octyl_10mms_0g_run3	1	201	3.00117	0.91719
octyl_10mms_0g_run3	1	202	3.00564	0.943051
octyl_10mms_0g_run3	1	203	3.00677	0.936743
octyl_10mms_0g_run3	1	204	3.0079	0.936273
octyl_10mms_0g_run3	1	205	3.00904	0.942268
octyl_10mms_0g_run3	1	206	3.01017	0.951437
octyl_10mms_0g_run3	1	207	3.01465	0.929004
octyl_10mms_0g_run3	1	208	3.01578	0.935313
octyl_10mms_0g_run3	1	209	3.01691	0.932119
octyl_10mms_0g_run3	1	210	3.01805	0.918934
octyl_10mms_0g_run3	1	211	3.01918	0.9196
octyl_10mms_0g_run3	1	212	3.02364	0.930317
octyl_10mms_0g_run3	1	213	3.02478	0.934725
octyl_10mms_0g_run3	1	214	3.02591	0.970245
octyl_10mms_0g_run3	1	215	3.02704	0.944364
octyl_10mms_0g_run3	1	216	3.02818	0.940681
octyl_10mms_0g_run3	1	217	3.03264	0.933353
octyl_10mms_0g_run3	1	218	3.03377	0.937135
octyl_10mms_0g_run3	1	219	3.03491	0.910431
octyl_10mms_0g_run3	1	220	3.03604	0.952671
octyl_10mms_0g_run3	1	221	3.03717	0.929866
octyl_10mms_0g_run3	1	222	3.04164	0.943913
octyl_10mms_0g_run3	1	223	3.04277	0.949242
octyl_10mms_0g_run3	1	224	3.04391	0.952044
octyl_10mms_0g_run3	1	225	3.04504	0.945539
octyl_10mms_0g_run3	1	226	3.04618	0.940348
octyl_10mms_0g_run3	1	227	3.05064	0.9273
octyl_10mms_0g_run3	1	228	3.05178	0.919032
octyl_10mms_0g_run3	1	229	3.05291	0.932824
octyl_10mms_0g_run3	1	230	3.05405	0.937311
octyl_10mms_0g_run3	1	231	3.05518	0.935646
octyl_10mms_0g_run3	1	232	3.05964	0.948537
octyl_10mms_0g_run3	1	233	3.06077	0.949379
octyl_10mms_0g_run3	1	234	3.0619	0.94166
octyl_10mms_0g_run3	1	235	3.06304	0.933373
octyl_10mms_0g_run3	1	236	3.06417	0.935313
octyl_10mms_0g_run3	1	237	3.06864	0.921246
octyl_10mms_0g_run3	1	238	3.06978	0.923401
octyl_10mms_0g_run3	1	239	3.07091	0.926908
octyl_10mms_0g_run3	1	240	3.07204	0.94119
octyl_10mms_0g_run3	1	241	3.07318	0.921265
octyl_10mms_0g_run3	1	242	3.07765	0.854595
octyl_10mms_0g_run3	1	243	3.07878	0.849227
octyl_10mms_0g_run3	1	244	3.07992	0.810376
octyl_10mms_0g_run3	1	245	3.08105	0.79725
octyl_10mms_0g_run3	1	246	3.08219	0.777367
octyl_10mms_0g_run3	1	247	3.08665	0.727075
octyl_10mms_0g_run3	1	248	3.08778	0.741808
octyl_10mms_0g_run3	1	249	3.08892	0.753445
octyl_10mms_0g_run3	1	250	3.09005	0.743434
octyl_10mms_0g_run3	1	251	3.09119	0.743355
octyl_10mms_0g_run3	1	252	3.09564	0.747078
octyl_10mms_0g_run3	1	253	3.09678	0.731835
octyl_10mms_0g_run3	1	254	3.09792	0.735499
octyl_10mms_0g_run3	1	255	3.09905	0.729445
octyl_10mms_0g_run3	1	256	3.10019	0.718082
octyl_10mms_0g_run3	1	257	3.10465	0.700841
octyl_10mms_0g_run3	1	258	3.10578	0.700685
octyl_10mms_0g_run3	1	259	3.10692	0.701919
octyl_10mms_0g_run3	1	260	3.10805	0.698745
octyl_10mms_0g_run3	1	261	3.10918	0.736283
octyl_10mms_0g_run3	1	262	3.11361	0.692809
octyl_10mms_0g_run3	1	263	3.11471	0.695297
octyl_10mms_0g_run3	1	264	3.11582	0.695845
octyl_10mms_0g_run3	1	265	3.11692	0.688205
octyl_10mms_0g_run3	1	266	3.11802	0.672708
octyl_10mms_0g_run3	1	267	3.12263	0.675294
octyl_10mms_0g_run3	1	268	3.12377	0.680701
octyl_10mms_0g_run3	2	1	3.3792	0.543795
octyl_10mms_0g_run3	2	2	3.38366	0.544794
octyl_10mms_0g_run3	2	3	3.38479	0.529023
octyl_10mms_0g_run3	2	4	3.38593	0.550142
octyl_10mms_0g_run3	2	5	3.38706	0.5368
octyl_10mms_0g_run3	2	6	3.3882	0.546792
octyl_10mms_0g_run3	2	7	3.39265	0.57904
octyl_10mms_0g_run3	2	8	3.39379	0.557979
octyl_10mms_0g_run3	2	9	3.39492	0.555706
octyl_10mms_0g_run3	2	10	3.39606	0.538485
octyl_10mms_0g_run3	2	11	3.39719	0.547596
octyl_10mms_0g_run3	2	12	3.40163	0.529414
octyl_10mms_0g_run3	2	13	3.40273	0.557646
octyl_10mms_0g_run3	2	14	3.40383	0.538035
octyl_10mms_0g_run3	2	15	3.40493	0.538603
octyl_10mms_0g_run3	2	16	3.40603	0.543109
octyl_10mms_0g_run3	2	17	3.41065	0.584428
octyl_10mms_0g_run3	2	18	3.41178	0.590286
octyl_10mms_0g_run3	2	19	3.41291	0.589267
octyl_10mms_0g_run3	2	20	3.41405	0.62032
octyl_10mms_0g_run3	2	21	3.41518	0.662403
octyl_10mms_0g_run3	2	22	3.41966	0.769453
octyl_10mms_0g_run3	2	23	3.42079	0.807657
octyl_10mms_0g_run3	2	24	3.42193	0.842883
octyl_10mms_0g_run3	2	25	3.42306	0.851268
octyl_10mms_0g_run3	2	26	3.42419	0.867901
octyl_10mms_0g_run3	2	27	3.42866	0.898308
octyl_10mms_0g_run3	2	28	3.42979	0.917253
octyl_10mms_0g_run3	2	29	3.43093	0.909279
octyl_10mms_0g_run3	2	30	3.43206	0.926598
octyl_10mms_0g_run3	2	31	3.4332	0.939588
octyl_10mms_0g_run3	2	32	3.43766	0.973619
octyl_10mms_0g_run3	2	33	3.43879	0.967349
octyl_10mms_0g_run3	2	34	3.43993	0.973834
octyl_10mms_0g_run3	2	35	3.44106	0.981259
octyl_10mms_0g_run3	2	36	3.44219	0.981573
octyl_10mms_0g_run3	2	37	3.44667	0.970347
octyl_10mms_0g_run3	2	38	3.4478	0.975676
octyl_10mms_0g_run3	2	39	3.44893	0.983356
octyl_10mms_0g_run3	2	40	3.45007	0.986941
octyl_10mms_0g_run3	2	41	3.4512	0.968681
octyl_10mms_0g_run3	2	42	3.45566	0.996678
octyl_10mms_0g_run3	2	43	3.4568	1.00277
octyl_10mms_0g_run3	2	44	3.45793	1.00491
octyl_10mms_0g_run3	2	45	3.45906	1.00024
octyl_10mms_0g_run3	2	46	3.4602	1.014
octyl_10mms_0g_run3	2	47	3.46466	0.99515
octyl_10mms_0g_run3	2	48	3.46579	1.00173
octyl_10mms_0g_run3	2	49	3.46693	0.990115
octyl_10mms_0g_run3	2	50	3.46806	0.977008
octyl_10mms_0g_run3	2	51	3.4692	0.985236
octyl_10mms_0g_run3	2	52	3.47366	0.993426
octyl_10mms_0g_run3	2	53	3.47479	0.982121
octyl_10mms_0g_run3	2	54	3.47593	1.01421
octyl_10mms_0g_run3	2	55	3.47706	0.999264
octyl_10mms_0g_run3	2	56	3.47819	0.994209
octyl_10mms_0g_run3	2	57	3.48266	0.976812
octyl_10mms_0g_run3	2	58	3.4838	0.971522
octyl_10mms_0g_run3	2	59	3.48494	0.963059
octyl_10mms_0g_run3	2	60	3.48607	0.993916
octyl_10mms_0g_run3	2	61	3.4872	0.966428
octyl_10mms_0g_run3	2	62	3.49166	0.961354
octyl_10mms_0g_run3	2	63	3.4928	0.985746
octyl_10mms_0g_run3	2	64	3.49393	0.980946
octyl_10mms_0g_run3	2	65	3.49507	0.971032
octyl_10mms_0g_run3	2	66	3.4962	0.960864
octyl_10mms_0g_run3	2	67	3.50066	0.964528
octyl_10mms_0g_run3	2	68	3.50179	0.951558
octyl_10mms_0g_run3	2	69	3.50293	0.964802
octyl_10mms_0g_run3	2	70	3.50406	0.955437
octyl_10mms_0g_run3	2	71	3.5052	0.965135
octyl_10mms_0g_run3	2	72	3.50967	0.979868
octyl_10mms_0g_run3	2	73	3.5108	0.971777
octyl_10mms_0g_run3	2	74	3.51194	0.957534
octyl_10mms_0g_run3	2	75	3.51307	0.949932
octyl_10mms_0g_run3	2	76	3.5142	0.961237
octyl_10mms_0g_run3	2	77	3.51867	0.941352
octyl_10mms_0g_run3	2	78	3.5198	0.946152
octyl_10mms_0g_run3	2	79	3.52094	0.948973
octyl_10mms_0g_run3	2	80	3.52207	0.963549
octyl_10mms_0g_run3	2	81	3.5232	0.949247
octyl_10mms_0g_run3	2	82	3.52767	0.945916
octyl_10mms_0g_run3	2	83	3.5288	0.95824
octyl_10mms_0g_run3	2	84	3.52993	0.949894
octyl_10mms_0g_run3	2	85	3.53107	0.94576
octyl_10mms_0g_run3	2	86	3.5322	0.94382
octyl_10mms_0g_run3	2	87	3.53667	0.941469
octyl_10mms_0g_run3	2	88	3.5378	0.953224
octyl_10mms_0g_run3	2	89	3.53893	0.942076
octyl_10mms_0g_run3	2	90	3.54006	0.950697
octyl_10mms_0g_run3	2	91	3.5412	0.951363
octyl_10mms_0g_run3	2	92	3.54563	0.951147
octyl_10mms_0g_run3	2	93	3.54674	0.939432
octyl_10mms_0g_run3	2	94	3.54784	0.939118
octyl_10mms_0g_run3	2	95	3.54894	0.944408
octyl_10mms_0g_run3	2	96	3.55004	0.948248
octyl_10mms_0g_run3	2	97	3.55465	0.939627
octyl_10mms_0g_run3	2	98	3.55579	0.938021
octyl_10mms_0g_run3	2	99	3.55692	0.947876
octyl_10mms_0g_run3	2	100	3.55805	0.94958
octyl_10mms_0g_run3	2	101	3.55918	0.95677
octyl_10mms_0g_run3	2	102	3.56367	0.935102
octyl_10mms_0g_run3	2	103	3.5648	0.940098
octyl_10mms_0g_run3	2	104	3.56593	0.948698
octyl_10mms_0g_run3	2	105	3.56707	0.939961
octyl_10mms_0g_run3	2	106	3.5682	0.92464
octyl_10mms_0g_run3	2	107	3.57267	0.941587
octyl_10mms_0g_run3	2	108	3.5738	0.947112
octyl_10mms_0g_run3	2	109	3.57493	0.940862
octyl_10mms_0g_run3	2	110	3.57607	0.963862
octyl_10mms_0g_run3	2	111	3.5772	0.957064
octyl_10mms_0g_run3	2	112	3.58167	0.941449
octyl_10mms_0g_run3	2	113	3.5828	0.943663
octyl_10mms_0g_run3	2	114	3.58393	0.93661
octyl_10mms_0g_run3	2	115	3.58507	0.924385
octyl_10mms_0g_run3	2	116	3.5862	0.956947
octyl_10mms_0g_run3	2	117	3.59067	0.940862
octyl_10mms_0g_run3	2	118	3.59181	0.934181
octyl_10mms_0g_run3	2	119	3.59294	0.95581
octyl_10mms_0g_run3	2	120	3.59407	0.953616
octyl_10mms_0g_run3	2	121	3.59521	0.937355
octyl_10mms_0g_run3	2	122	3.59967	0.936532
octyl_10mms_0g_run3	2	123	3.6008	0.931438
[truncated: 32,813 more rows]

## Sheet: C4-APTMS
VariableName	CellIndex	RowIndex	Time (s)	Force (N)
ButylAmino_10mms_0g_run1	1	1	2.79345	0.55552
ButylAmino_10mms_0g_run1	1	2	2.79458	0.560693
ButylAmino_10mms_0g_run1	1	3	2.79905	0.537672
ButylAmino_10mms_0g_run1	1	4	2.80018	0.568647
ButylAmino_10mms_0g_run1	1	5	2.80131	0.55123
ButylAmino_10mms_0g_run1	1	6	2.80245	0.562025
ButylAmino_10mms_0g_run1	1	7	2.80358	0.561594
ButylAmino_10mms_0g_run1	1	8	2.80805	0.577973
ButylAmino_10mms_0g_run1	1	9	2.80918	0.56228
ButylAmino_10mms_0g_run1	1	10	2.81032	0.55503
ButylAmino_10mms_0g_run1	1	11	2.81145	0.56708
ButylAmino_10mms_0g_run1	1	12	2.81258	0.548723
ButylAmino_10mms_0g_run1	1	13	2.81705	0.563456
ButylAmino_10mms_0g_run1	1	14	2.81819	0.555913
ButylAmino_10mms_0g_run1	1	15	2.81932	0.553327
ButylAmino_10mms_0g_run1	1	16	2.82046	0.555972
ButylAmino_10mms_0g_run1	1	17	2.82159	0.560968
ButylAmino_10mms_0g_run1	1	18	2.82605	0.558362
ButylAmino_10mms_0g_run1	1	19	2.82719	0.563123
ButylAmino_10mms_0g_run1	1	20	2.82832	0.555051
ButylAmino_10mms_0g_run1	1	21	2.82945	0.576171
ButylAmino_10mms_0g_run1	1	22	2.83059	0.584028
ButylAmino_10mms_0g_run1	1	23	2.83505	0.67758
ButylAmino_10mms_0g_run1	1	24	2.83619	0.686534
ButylAmino_10mms_0g_run1	1	25	2.83732	0.715785
ButylAmino_10mms_0g_run1	1	26	2.83846	0.742058
ButylAmino_10mms_0g_run1	1	27	2.83959	0.7631
ButylAmino_10mms_0g_run1	1	28	2.84402	0.818918
ButylAmino_10mms_0g_run1	1	29	2.84512	0.833808
ButylAmino_10mms_0g_run1	1	30	2.84622	0.823953
ButylAmino_10mms_0g_run1	1	31	2.84732	0.854889
ButylAmino_10mms_0g_run1	1	32	2.84843	0.812335
ButylAmino_10mms_0g_run1	1	33	2.85304	0.907278
ButylAmino_10mms_0g_run1	1	34	2.85418	0.883572
ButylAmino_10mms_0g_run1	1	35	2.85531	0.91486
ButylAmino_10mms_0g_run1	1	36	2.85644	0.91727
ButylAmino_10mms_0g_run1	1	37	2.85758	0.94754
ButylAmino_10mms_0g_run1	1	38	2.86205	0.920836
ButylAmino_10mms_0g_run1	1	39	2.86319	0.898462
ButylAmino_10mms_0g_run1	1	40	2.86432	0.897384
ButylAmino_10mms_0g_run1	1	41	2.86546	0.889861
ButylAmino_10mms_0g_run1	1	42	2.86659	0.869407
ButylAmino_10mms_0g_run1	1	43	2.87105	0.904006
ButylAmino_10mms_0g_run1	1	44	2.87219	0.900264
ButylAmino_10mms_0g_run1	1	45	2.87332	0.929574
ButylAmino_10mms_0g_run1	1	46	2.87446	0.920562
ButylAmino_10mms_0g_run1	1	47	2.87559	0.927438
ButylAmino_10mms_0g_run1	1	48	2.88005	0.919876
ButylAmino_10mms_0g_run1	1	49	2.88118	0.909668
ButylAmino_10mms_0g_run1	1	50	2.88232	0.904947
ButylAmino_10mms_0g_run1	1	51	2.88345	0.892231
ButylAmino_10mms_0g_run1	1	52	2.88459	0.910962
ButylAmino_10mms_0g_run1	1	53	2.88906	0.91729
ButylAmino_10mms_0g_run1	1	54	2.89019	0.955827
ButylAmino_10mms_0g_run1	1	55	2.89132	0.919484
ButylAmino_10mms_0g_run1	1	56	2.89246	0.923814
ButylAmino_10mms_0g_run1	1	57	2.89359	0.914586
ButylAmino_10mms_0g_run1	1	58	2.89805	0.889351
ButylAmino_10mms_0g_run1	1	59	2.89919	0.851362
ButylAmino_10mms_0g_run1	1	60	2.90032	0.864117
ButylAmino_10mms_0g_run1	1	61	2.90146	0.876617
ButylAmino_10mms_0g_run1	1	62	2.90259	0.839764
ButylAmino_10mms_0g_run1	1	63	2.90705	0.87932
ButylAmino_10mms_0g_run1	1	64	2.90819	0.868486
ButylAmino_10mms_0g_run1	1	65	2.90932	0.888078
ButylAmino_10mms_0g_run1	1	66	2.91045	0.852401
ButylAmino_10mms_0g_run1	1	67	2.91159	0.868172
ButylAmino_10mms_0g_run1	1	68	2.91605	0.840959
ButylAmino_10mms_0g_run1	1	69	2.91719	0.882102
ButylAmino_10mms_0g_run1	1	70	2.91833	0.852675
ButylAmino_10mms_0g_run1	1	71	2.91946	0.865527
ButylAmino_10mms_0g_run1	1	72	2.92059	0.877008
ButylAmino_10mms_0g_run1	1	73	2.92506	0.897325
ButylAmino_10mms_0g_run1	1	74	2.9262	0.861922
ButylAmino_10mms_0g_run1	1	75	2.92733	0.866781
ButylAmino_10mms_0g_run1	1	76	2.92847	0.877185
ButylAmino_10mms_0g_run1	1	77	2.9296	0.874422
ButylAmino_10mms_0g_run1	1	78	2.93406	0.870112
ButylAmino_10mms_0g_run1	1	79	2.93519	0.871856
ButylAmino_10mms_0g_run1	1	80	2.93633	0.90046
ButylAmino_10mms_0g_run1	1	81	2.93746	0.881319
ButylAmino_10mms_0g_run1	1	82	2.9386	0.885198
ButylAmino_10mms_0g_run1	1	83	2.94305	0.882083
ButylAmino_10mms_0g_run1	1	84	2.94419	0.879869
ButylAmino_10mms_0g_run1	1	85	2.94532	0.894014
ButylAmino_10mms_0g_run1	1	86	2.94646	0.870621
ButylAmino_10mms_0g_run1	1	87	2.94759	0.883964
ButylAmino_10mms_0g_run1	1	88	2.95206	0.869544
ButylAmino_10mms_0g_run1	1	89	2.95319	0.883317
ButylAmino_10mms_0g_run1	1	90	2.95432	0.864802
ButylAmino_10mms_0g_run1	1	91	2.95546	0.876812
ButylAmino_10mms_0g_run1	1	92	2.95659	0.888372
ButylAmino_10mms_0g_run1	1	93	2.96106	0.8918
ButylAmino_10mms_0g_run1	1	94	2.9622	0.874638
ButylAmino_10mms_0g_run1	1	95	2.96333	0.881299
ButylAmino_10mms_0g_run1	1	96	2.96446	0.882416
ButylAmino_10mms_0g_run1	1	97	2.9656	0.864489
ButylAmino_10mms_0g_run1	1	98	2.97006	0.883944
ButylAmino_10mms_0g_run1	1	99	2.97119	0.868995
ButylAmino_10mms_0g_run1	1	100	2.97233	0.893955
ButylAmino_10mms_0g_run1	1	101	2.97346	0.892114
ButylAmino_10mms_0g_run1	1	102	2.9746	0.89756
ButylAmino_10mms_0g_run1	1	103	2.97906	0.857769
ButylAmino_10mms_0g_run1	1	104	2.98019	0.886432
ButylAmino_10mms_0g_run1	1	105	2.98133	0.866683
ButylAmino_10mms_0g_run1	1	106	2.98246	0.852381
ButylAmino_10mms_0g_run1	1	107	2.98359	0.882749
ButylAmino_10mms_0g_run1	1	108	2.98802	0.880163
ButylAmino_10mms_0g_run1	1	109	2.98913	0.860473
ButylAmino_10mms_0g_run1	1	110	2.99023	0.910021
ButylAmino_10mms_0g_run1	1	111	2.99133	0.878576
ButylAmino_10mms_0g_run1	1	112	2.99244	0.876871
ButylAmino_10mms_0g_run1	1	113	2.99705	0.877714
ButylAmino_10mms_0g_run1	1	114	2.99818	0.867114
ButylAmino_10mms_0g_run1	1	115	2.99931	0.840136
ButylAmino_10mms_0g_run1	1	116	3.00045	0.901988
ButylAmino_10mms_0g_run1	1	117	3.00159	0.868917
ButylAmino_10mms_0g_run1	1	118	3.00606	0.883709
ButylAmino_10mms_0g_run1	1	119	3.00719	0.901636
ButylAmino_10mms_0g_run1	1	120	3.00833	0.900813
ButylAmino_10mms_0g_run1	1	121	3.00946	0.895151
ButylAmino_10mms_0g_run1	1	122	3.0106	0.889195
ButylAmino_10mms_0g_run1	1	123	3.01506	0.870837
ButylAmino_10mms_0g_run1	1	124	3.01619	0.884688
ButylAmino_10mms_0g_run1	1	125	3.01733	0.88077
ButylAmino_10mms_0g_run1	1	126	3.01846	0.89229
ButylAmino_10mms_0g_run1	1	127	3.0196	0.895699
ButylAmino_10mms_0g_run1	1	128	3.02406	0.924264
ButylAmino_10mms_0g_run1	1	129	3.02519	0.906886
ButylAmino_10mms_0g_run1	1	130	3.02633	0.889195
ButylAmino_10mms_0g_run1	1	131	3.02746	0.89711
ButylAmino_10mms_0g_run1	1	132	3.0286	0.874109
ButylAmino_10mms_0g_run1	1	133	3.03307	0.874011
ButylAmino_10mms_0g_run1	1	134	3.0342	0.87356
ButylAmino_10mms_0g_run1	1	135	3.03533	0.900499
ButylAmino_10mms_0g_run1	1	136	3.03646	0.87162
ButylAmino_10mms_0g_run1	1	137	3.0376	0.906612
ButylAmino_10mms_0g_run1	1	138	3.04206	0.86876
ButylAmino_10mms_0g_run1	1	139	3.0432	0.902772
ButylAmino_10mms_0g_run1	1	140	3.04433	0.878772
ButylAmino_10mms_0g_run1	1	141	3.04546	0.903085
ButylAmino_10mms_0g_run1	1	142	3.0466	0.893485
ButylAmino_10mms_0g_run1	1	143	3.05106	0.892466
ButylAmino_10mms_0g_run1	1	144	3.0522	0.896032
ButylAmino_10mms_0g_run1	1	145	3.05333	0.907454
ButylAmino_10mms_0g_run1	1	146	3.05447	0.906279
ButylAmino_10mms_0g_run1	1	147	3.0556	0.893799
ButylAmino_10mms_0g_run1	1	148	3.06006	0.912411
ButylAmino_10mms_0g_run1	1	149	3.0612	0.904398
ButylAmino_10mms_0g_run1	1	150	3.06233	0.909982
ButylAmino_10mms_0g_run1	1	151	3.06347	0.905534
ButylAmino_10mms_0g_run1	1	152	3.0646	0.903418
ButylAmino_10mms_0g_run1	1	153	3.06907	0.899324
ButylAmino_10mms_0g_run1	1	154	3.0702	0.904359
ButylAmino_10mms_0g_run1	1	155	3.07133	0.903575
ButylAmino_10mms_0g_run1	1	156	3.07246	0.895915
ButylAmino_10mms_0g_run1	1	157	3.0736	0.952066
ButylAmino_10mms_0g_run1	1	158	3.07806	0.888881
ButylAmino_10mms_0g_run1	1	159	3.0792	0.902302
ButylAmino_10mms_0g_run1	1	160	3.08033	0.879575
ButylAmino_10mms_0g_run1	1	161	3.08147	0.889371
ButylAmino_10mms_0g_run1	1	162	3.0826	0.863137
ButylAmino_10mms_0g_run1	1	163	3.08706	0.896542
ButylAmino_10mms_0g_run1	1	164	3.0882	0.881887
ButylAmino_10mms_0g_run1	1	165	3.08933	0.901636
ButylAmino_10mms_0g_run1	1	166	3.09047	0.915037
ButylAmino_10mms_0g_run1	1	167	3.0916	0.896816
ButylAmino_10mms_0g_run1	1	168	3.09607	0.89711
ButylAmino_10mms_0g_run1	1	169	3.0972	0.896953
ButylAmino_10mms_0g_run1	1	170	3.09834	0.902204
ButylAmino_10mms_0g_run1	1	171	3.09947	0.873266
ButylAmino_10mms_0g_run1	1	172	3.1006	0.905709
ButylAmino_10mms_0g_run1	1	173	3.10507	0.898852
ButylAmino_10mms_0g_run1	1	174	3.1062	0.923753
ButylAmino_10mms_0g_run1	1	175	3.10733	0.912958
ButylAmino_10mms_0g_run1	1	176	3.10846	0.921873
ButylAmino_10mms_0g_run1	1	177	3.1096	0.911508
ButylAmino_10mms_0g_run1	1	178	3.11407	0.911195
ButylAmino_10mms_0g_run1	1	179	3.1152	0.857042
ButylAmino_10mms_0g_run1	1	180	3.11634	0.886078
ButylAmino_10mms_0g_run1	1	181	3.11747	0.899949
ButylAmino_10mms_0g_run1	1	182	3.1186	0.884687
ButylAmino_10mms_0g_run1	1	183	3.12307	0.898068
ButylAmino_10mms_0g_run1	1	184	3.1242	0.915838
ButylAmino_10mms_0g_run1	1	185	3.12533	0.90232
ButylAmino_10mms_0g_run1	1	186	3.12647	0.890212
ButylAmino_10mms_0g_run1	1	187	3.1276	0.901928
ButylAmino_10mms_0g_run1	1	188	3.13203	0.867426
ButylAmino_10mms_0g_run1	1	189	3.13314	0.893092
ButylAmino_10mms_0g_run1	1	190	3.13424	0.880514
ButylAmino_10mms_0g_run1	1	191	3.13534	0.89415
ButylAmino_10mms_0g_run1	1	192	3.13644	0.907433
ButylAmino_10mms_0g_run1	1	193	3.14105	0.922167
ButylAmino_10mms_0g_run1	1	194	3.14219	0.907512
ButylAmino_10mms_0g_run1	1	195	3.14333	0.901889
ButylAmino_10mms_0g_run1	1	196	3.14446	0.909824
ButylAmino_10mms_0g_run1	1	197	3.1456	0.92248
ButylAmino_10mms_0g_run1	1	198	3.15007	0.911273
ButylAmino_10mms_0g_run1	1	199	3.1512	0.893974
ButylAmino_10mms_0g_run1	1	200	3.15234	0.909902
ButylAmino_10mms_0g_run1	1	201	3.15347	0.922206
ButylAmino_10mms_0g_run1	1	202	3.15461	0.895502
ButylAmino_10mms_0g_run1	1	203	3.15907	0.90949
ButylAmino_10mms_0g_run1	1	204	3.1602	0.902829
ButylAmino_10mms_0g_run1	1	205	3.16134	0.920932
ButylAmino_10mms_0g_run1	1	206	3.16247	0.898343
ButylAmino_10mms_0g_run1	1	207	3.1636	0.926105
ButylAmino_10mms_0g_run1	1	208	3.16806	0.899185
ButylAmino_10mms_0g_run1	1	209	3.1692	0.91866
ButylAmino_10mms_0g_run1	1	210	3.17033	0.911998
ButylAmino_10mms_0g_run1	1	211	3.17147	0.911939
ButylAmino_10mms_0g_run1	1	212	3.1726	0.917856
ButylAmino_10mms_0g_run1	1	213	3.17707	0.92922
ButylAmino_10mms_0g_run1	1	214	3.1782	0.908276
ButylAmino_10mms_0g_run1	1	215	3.17934	0.908119
ButylAmino_10mms_0g_run1	1	216	3.18047	0.914153
ButylAmino_10mms_0g_run1	1	217	3.18161	0.903005
ButylAmino_10mms_0g_run1	1	218	3.18607	0.908001
ButylAmino_10mms_0g_run1	1	219	3.18721	0.911117
ButylAmino_10mms_0g_run1	1	220	3.18834	0.917856
ButylAmino_10mms_0g_run1	1	221	3.18948	0.903182
ButylAmino_10mms_0g_run1	1	222	3.19061	0.938741
ButylAmino_10mms_0g_run1	1	223	3.19507	0.911744
ButylAmino_10mms_0g_run1	1	224	3.1962	0.919482
ButylAmino_10mms_0g_run1	1	225	3.19734	0.927398
ButylAmino_10mms_0g_run1	1	226	3.19847	0.893111
ButylAmino_10mms_0g_run1	1	227	3.19961	0.90904
ButylAmino_10mms_0g_run1	1	228	3.20407	0.916857
ButylAmino_10mms_0g_run1	1	229	3.2052	0.932276
ButylAmino_10mms_0g_run1	1	230	3.20634	0.913742
ButylAmino_10mms_0g_run1	1	231	3.20747	0.947166
ButylAmino_10mms_0g_run1	1	232	3.20861	0.923146
ButylAmino_10mms_0g_run1	1	233	3.21307	0.928064
ButylAmino_10mms_0g_run1	1	234	3.21421	0.910137
ButylAmino_10mms_0g_run1	1	235	3.21534	0.883648
ButylAmino_10mms_0g_run1	1	236	3.21648	0.903456
ButylAmino_10mms_0g_run1	1	237	3.21761	0.904397
ButylAmino_10mms_0g_run1	1	238	3.22207	0.907649
ButylAmino_10mms_0g_run1	1	239	3.22321	0.914682
ButylAmino_10mms_0g_run1	1	240	3.22434	0.936273
ButylAmino_10mms_0g_run1	1	241	3.22548	0.890721
ButylAmino_10mms_0g_run1	1	242	3.22661	0.917484
ButylAmino_10mms_0g_run1	1	243	3.23107	0.865898
ButylAmino_10mms_0g_run1	1	244	3.2322	0.865585
ButylAmino_10mms_0g_run1	1	245	3.23334	0.833042
ButylAmino_10mms_0g_run1	1	246	3.23447	0.827831
ButylAmino_10mms_0g_run1	1	247	3.2356	0.82115
ButylAmino_10mms_0g_run1	1	248	3.24007	0.797972
ButylAmino_10mms_0g_run1	1	249	3.2412	0.789038
ButylAmino_10mms_0g_run1	1	250	3.24234	0.771503
ButylAmino_10mms_0g_run1	1	251	3.24347	0.7755
ButylAmino_10mms_0g_run1	1	252	3.24461	0.76149
ButylAmino_10mms_0g_run1	1	253	3.24907	0.747443
ButylAmino_10mms_0g_run1	1	254	3.25021	0.764468
ButylAmino_10mms_0g_run1	1	255	3.25134	0.772481
ButylAmino_10mms_0g_run1	1	256	3.25247	0.763587
ButylAmino_10mms_0g_run1	1	257	3.2536	0.758297
ButylAmino_10mms_0g_run1	1	258	3.25807	0.753477
ButylAmino_10mms_0g_run1	1	259	3.25921	0.746052
ButylAmino_10mms_0g_run1	1	260	3.26034	0.728341
ButylAmino_10mms_0g_run1	1	261	3.26147	0.728615
ButylAmino_10mms_0g_run1	1	262	3.26261	0.740958
ButylAmino_10mms_0g_run1	1	263	3.26707	0.740546
ButylAmino_10mms_0g_run1	1	264	3.26821	0.733376
ButylAmino_10mms_0g_run1	1	265	3.26934	0.716272
ButylAmino_10mms_0g_run1	1	266	3.27048	0.73318
ButylAmino_10mms_0g_run1	1	267	3.27161	0.721268
ButylAmino_10mms_0g_run1	1	268	3.27604	0.729712
ButylAmino_10mms_0g_run1	2	1	3.64736	0.588216
ButylAmino_10mms_0g_run1	2	2	3.64849	0.587766
ButylAmino_10mms_0g_run1	2	3	3.64963	0.561336
ButylAmino_10mms_0g_run1	2	4	3.65409	0.593957
ButylAmino_10mms_0g_run1	2	5	3.65523	0.580438
ButylAmino_10mms_0g_run1	2	6	3.65636	0.599207
ButylAmino_10mms_0g_run1	2	7	3.6575	0.601382
ButylAmino_10mms_0g_run1	2	8	3.65863	0.605006
ButylAmino_10mms_0g_run1	2	9	3.66309	0.576285
ButylAmino_10mms_0g_run1	2	10	3.66422	0.592762
ButylAmino_10mms_0g_run1	2	11	3.66536	0.547524
ButylAmino_10mms_0g_run1	2	12	3.66649	0.561924
ButylAmino_10mms_0g_run1	2	13	3.66762	0.58465
ButylAmino_10mms_0g_run1	2	14	3.67209	0.600696
ButylAmino_10mms_0g_run1	2	15	3.67323	0.620543
ButylAmino_10mms_0g_run1	2	16	3.67436	0.627537
ButylAmino_10mms_0g_run1	2	17	3.67549	0.625382
ButylAmino_10mms_0g_run1	2	18	3.67663	0.638177
ButylAmino_10mms_0g_run1	2	19	3.68109	0.76384
ButylAmino_10mms_0g_run1	2	20	3.68223	0.738449
ButylAmino_10mms_0g_run1	2	21	3.68336	0.789231
ButylAmino_10mms_0g_run1	2	22	3.68449	0.804944
ButylAmino_10mms_0g_run1	2	23	3.68563	0.814309
ButylAmino_10mms_0g_run1	2	24	3.69009	0.834979
ButylAmino_10mms_0g_run1	2	25	3.69123	0.859312
ButylAmino_10mms_0g_run1	2	26	3.69236	0.854923
ButylAmino_10mms_0g_run1	2	27	3.6935	0.845264
ButylAmino_10mms_0g_run1	2	28	3.69463	0.851181
ButylAmino_10mms_0g_run1	2	29	3.69909	0.847302
ButylAmino_10mms_0g_run1	2	30	3.70023	0.863348
ButylAmino_10mms_0g_run1	2	31	3.70136	0.861369
ButylAmino_10mms_0g_run1	2	32	3.7025	0.859978
ButylAmino_10mms_0g_run1	2	33	3.70363	0.858822
ButylAmino_10mms_0g_run1	2	34	3.70806	0.86662
ButylAmino_10mms_0g_run1	2	35	3.70916	0.850397
ButylAmino_10mms_0g_run1	2	36	3.71027	0.846734
ButylAmino_10mms_0g_run1	2	37	3.71137	0.848144
ButylAmino_10mms_0g_run1	2	38	3.71247	0.838133
ButylAmino_10mms_0g_run1	2	39	3.71708	0.880902
ButylAmino_10mms_0g_run1	2	40	3.71821	0.854962
ButylAmino_10mms_0g_run1	2	41	3.71935	0.859939
ButylAmino_10mms_0g_run1	2	42	3.72048	0.877513
ButylAmino_10mms_0g_run1	2	43	3.72162	0.857255
ButylAmino_10mms_0g_run1	2	44	3.7261	0.855746
ButylAmino_10mms_0g_run1	2	45	3.72723	0.871047
ButylAmino_10mms_0g_run1	2	46	3.72837	0.869245
ButylAmino_10mms_0g_run1	2	47	3.7295	0.856667
ButylAmino_10mms_0g_run1	2	48	3.73063	0.868324
ButylAmino_10mms_0g_run1	2	49	3.7351	0.860977
ButylAmino_10mms_0g_run1	2	50	3.73623	0.865914
ButylAmino_10mms_0g_run1	2	51	3.73737	0.848575
ButylAmino_10mms_0g_run1	2	52	3.7385	0.868834
ButylAmino_10mms_0g_run1	2	53	3.73963	0.849222
ButylAmino_10mms_0g_run1	2	54	3.74409	0.86754
ButylAmino_10mms_0g_run1	2	55	3.74523	0.853062
ButylAmino_10mms_0g_run1	2	56	3.74636	0.865327
ButylAmino_10mms_0g_run1	2	57	3.7475	0.865013
ButylAmino_10mms_0g_run1	2	58	3.74863	0.841797
ButylAmino_10mms_0g_run1	2	59	3.7531	0.856314
ButylAmino_10mms_0g_run1	2	60	3.75423	0.871106
ButylAmino_10mms_0g_run1	2	61	3.75537	0.856549
ButylAmino_10mms_0g_run1	2	62	3.75651	0.872047
ButylAmino_10mms_0g_run1	2	63	3.75764	0.89013
ButylAmino_10mms_0g_run1	2	64	3.7621	0.864621
ButylAmino_10mms_0g_run1	2	65	3.76323	0.882039
ButylAmino_10mms_0g_run1	2	66	3.76437	0.870499
ButylAmino_10mms_0g_run1	2	67	3.7655	0.852278
ButylAmino_10mms_0g_run1	2	68	3.76664	0.853003
ButylAmino_10mms_0g_run1	2	69	3.7711	0.880667
ButylAmino_10mms_0g_run1	2	70	3.77223	0.885722
ButylAmino_10mms_0g_run1	2	71	3.77337	0.880177
ButylAmino_10mms_0g_run1	2	72	3.7745	0.901611
ButylAmino_10mms_0g_run1	2	73	3.77564	0.860017
ButylAmino_10mms_0g_run1	2	74	3.7801	0.886799
ButylAmino_10mms_0g_run1	2	75	3.78123	0.864171
ButylAmino_10mms_0g_run1	2	76	3.78236	0.864406
ButylAmino_10mms_0g_run1	2	77	3.7835	0.852102
ButylAmino_10mms_0g_run1	2	78	3.78463	0.875945
ButylAmino_10mms_0g_run1	2	79	3.7891	0.859155
ButylAmino_10mms_0g_run1	2	80	3.79023	0.885761
ButylAmino_10mms_0g_run1	2	81	3.79137	0.885017
ButylAmino_10mms_0g_run1	2	82	3.7925	0.883077
ButylAmino_10mms_0g_run1	2	83	3.79363	0.879296
ButylAmino_10mms_0g_run1	2	84	3.7981	0.877297
ButylAmino_10mms_0g_run1	2	85	3.79923	0.860174
ButylAmino_10mms_0g_run1	2	86	3.80037	0.876612
ButylAmino_10mms_0g_run1	2	87	3.80151	0.885526
ButylAmino_10mms_0g_run1	2	88	3.80264	0.865111
ButylAmino_10mms_0g_run1	2	89	3.8071	0.92469
ButylAmino_10mms_0g_run1	2	90	3.80823	0.888484
ButylAmino_10mms_0g_run1	2	91	3.80936	0.882332
ButylAmino_10mms_0g_run1	2	92	3.8105	0.87285
ButylAmino_10mms_0g_run1	2	93	3.81163	0.873046
ButylAmino_10mms_0g_run1	2	94	3.8161	0.846636
ButylAmino_10mms_0g_run1	2	95	3.81724	0.899123
ButylAmino_10mms_0g_run1	2	96	3.81837	0.861016
ButylAmino_10mms_0g_run1	2	97	3.8195	0.868285
ButylAmino_10mms_0g_run1	2	98	3.82064	0.88482
ButylAmino_10mms_0g_run1	2	99	3.8251	0.887661
ButylAmino_10mms_0g_run1	2	100	3.82624	0.870479
ButylAmino_10mms_0g_run1	2	101	3.82737	0.859762
ButylAmino_10mms_0g_run1	2	102	3.82851	0.879295
ButylAmino_10mms_0g_run1	2	103	3.82964	0.860212
ButylAmino_10mms_0g_run1	2	104	3.8341	0.85455
ButylAmino_10mms_0g_run1	2	105	3.83523	0.864052
ButylAmino_10mms_0g_run1	2	106	3.83637	0.865149
ButylAmino_10mms_0g_run1	2	107	3.8375	0.874436
ButylAmino_10mms_0g_run1	2	108	3.83863	0.855393
ButylAmino_10mms_0g_run1	2	109	3.8431	0.880843
ButylAmino_10mms_0g_run1	2	110	3.84423	0.861643
ButylAmino_10mms_0g_run1	2	111	3.84537	0.882998
ButylAmino_10mms_0g_run1	2	112	3.84651	0.861838
ButylAmino_10mms_0g_run1	2	113	3.84764	0.874691
ButylAmino_10mms_0g_run1	2	114	3.85207	0.859683
ButylAmino_10mms_0g_run1	2	115	3.85317	0.875435
ButylAmino_10mms_0g_run1	2	116	3.85427	0.869381
ButylAmino_10mms_0g_run1	2	117	3.85537	0.860016
ButylAmino_10mms_0g_run1	2	118	3.85648	0.88096
ButylAmino_10mms_0g_run1	2	119	3.86109	0.861055
ButylAmino_10mms_0g_run1	2	120	3.86222	0.870694
ButylAmino_10mms_0g_run1	2	121	3.86336	0.873241
ButylAmino_10mms_0g_run1	2	122	3.86449	0.86174
ButylAmino_10mms_0g_run1	2	123	3.86562	0.85886
ButylAmino_10mms_0g_run1	2	124	3.8701	0.873319
ButylAmino_10mms_0g_run1	2	125	3.87123	0.865953
ButylAmino_10mms_0g_run1	2	126	3.87237	0.885173
ButylAmino_10mms_0g_run1	2	127	3.8735	0.870067
ButylAmino_10mms_0g_run1	2	128	3.87464	0.888327
ButylAmino_10mms_0g_run1	2	129	3.8791	0.86656
ButylAmino_10mms_0g_run1	2	130	3.88024	0.888679
ButylAmino_10mms_0g_run1	2	131	3.88137	0.874887
ButylAmino_10mms_0g_run1	2	132	3.8825	0.853786
ButylAmino_10mms_0g_run1	2	133	3.88364	0.872379
ButylAmino_10mms_0g_run1	2	134	3.8881	0.874691
ButylAmino_10mms_0g_run1	2	135	3.88923	0.892539
ButylAmino_10mms_0g_run1	2	136	3.89037	0.90835
ButylAmino_10mms_0g_run1	2	137	3.89151	0.903236
ButylAmino_10mms_0g_run1	2	138	3.89264	0.894812
ButylAmino_10mms_0g_run1	2	139	3.89711	0.887994
ButylAmino_10mms_0g_run1	2	140	3.89824	0.865032
ButylAmino_10mms_0g_run1	2	141	3.89938	0.870087
ButylAmino_10mms_0g_run1	2	142	3.90051	0.902139
ButylAmino_10mms_0g_run1	2	143	3.90164	0.873731
ButylAmino_10mms_0g_run1	2	144	3.9061	0.882567
ButylAmino_10mms_0g_run1	2	145	3.90724	0.909016
ButylAmino_10mms_0g_run1	2	146	3.90837	0.91121
ButylAmino_10mms_0g_run1	2	147	3.90951	0.882292
ButylAmino_10mms_0g_run1	2	148	3.91065	0.885368
ButylAmino_10mms_0g_run1	2	149	3.9151	0.862054
ButylAmino_10mms_0g_run1	2	150	3.91624	0.882175
ButylAmino_10mms_0g_run1	2	151	3.91737	0.88049
ButylAmino_10mms_0g_run1	2	152	3.91851	0.881215
ButylAmino_10mms_0g_run1	2	153	3.91964	0.894361
ButylAmino_10mms_0g_run1	2	154	3.9241	0.922515
ButylAmino_10mms_0g_run1	2	155	3.92524	0.91025
ButylAmino_10mms_0g_run1	2	156	3.92637	0.88768
ButylAmino_10mms_0g_run1	2	157	3.92751	0.906116
ButylAmino_10mms_0g_run1	2	158	3.92864	0.888327
ButylAmino_10mms_0g_run1	2	159	3.93311	0.885897
ButylAmino_10mms_0g_run1	2	160	3.93424	0.867755
ButylAmino_10mms_0g_run1	2	161	3.93537	0.905352
ButylAmino_10mms_0g_run1	2	162	3.93651	0.894596
ButylAmino_10mms_0g_run1	2	163	3.93764	0.893597
ButylAmino_10mms_0g_run1	2	164	3.94211	0.88623
ButylAmino_10mms_0g_run1	2	165	3.94324	0.912895
ButylAmino_10mms_0g_run1	2	166	3.94438	0.887073
ButylAmino_10mms_0g_run1	2	167	3.94551	0.895478
ButylAmino_10mms_0g_run1	2	168	3.94665	0.899671
ButylAmino_10mms_0g_run1	2	169	3.9511	0.887974
ButylAmino_10mms_0g_run1	2	170	3.95223	0.916441
ButylAmino_10mms_0g_run1	2	171	3.95337	0.89587
ButylAmino_10mms_0g_run1	2	172	3.9545	0.902198
ButylAmino_10mms_0g_run1	2	173	3.95564	0.914129
ButylAmino_10mms_0g_run1	2	174	3.96011	0.920614
ButylAmino_10mms_0g_run1	2	175	3.96124	0.907782
ButylAmino_10mms_0g_run1	2	176	3.96238	0.915148
ButylAmino_10mms_0g_run1	2	177	3.96351	0.916696
ButylAmino_10mms_0g_run1	2	178	3.96465	0.917205
ButylAmino_10mms_0g_run1	2	179	3.96911	0.916598
ButylAmino_10mms_0g_run1	2	180	3.97024	0.912444
ButylAmino_10mms_0g_run1	2	181	3.97138	0.920242
ButylAmino_10mms_0g_run1	2	182	3.97251	0.920986
ButylAmino_10mms_0g_run1	2	183	3.97365	0.933114
ButylAmino_10mms_0g_run1	2	184	3.97811	0.887896
ButylAmino_10mms_0g_run1	2	185	3.97925	0.915677
ButylAmino_10mms_0g_run1	2	186	3.98038	0.904372
ButylAmino_10mms_0g_run1	2	187	3.98151	0.904941
ButylAmino_10mms_0g_run1	2	188	3.98265	0.890932
ButylAmino_10mms_0g_run1	2	189	3.98711	0.926648
ButylAmino_10mms_0g_run1	2	190	3.98824	0.915677
ButylAmino_10mms_0g_run1	2	191	3.98938	0.912699
ButylAmino_10mms_0g_run1	2	192	3.99051	0.956154
ButylAmino_10mms_0g_run1	2	193	3.99165	0.921457
ButylAmino_10mms_0g_run1	2	194	3.99607	0.920007
ButylAmino_10mms_0g_run1	2	195	3.99717	0.915814
ButylAmino_10mms_0g_run1	2	196	3.99828	0.903099
ButylAmino_10mms_0g_run1	2	197	3.99938	0.905901
ButylAmino_10mms_0g_run1	2	198	4.00049	0.925884
ButylAmino_10mms_0g_run1	2	199	4.00509	0.922613
ButylAmino_10mms_0g_run1	2	200	4.00623	0.898808
ButylAmino_10mms_0g_run1	2	201	4.00736	0.94336
ButylAmino_10mms_0g_run1	2	202	4.0085	0.926022
ButylAmino_10mms_0g_run1	2	203	4.00963	0.912288
ButylAmino_10mms_0g_run1	2	204	4.01411	0.910407
ButylAmino_10mms_0g_run1	2	205	4.01524	0.909956
ButylAmino_10mms_0g_run1	2	206	4.01638	0.897358
ButylAmino_10mms_0g_run1	2	207	4.01751	0.909231
ButylAmino_10mms_0g_run1	2	208	4.01865	0.910113
ButylAmino_10mms_0g_run1	2	209	4.02311	0.925924
ButylAmino_10mms_0g_run1	2	210	4.02424	0.932996
ButylAmino_10mms_0g_run1	2	211	4.02538	0.933153
ButylAmino_10mms_0g_run1	2	212	4.02651	0.916167
ButylAmino_10mms_0g_run1	2	213	4.02765	0.911563
ButylAmino_10mms_0g_run1	2	214	4.03211	0.882841
ButylAmino_10mms_0g_run1	2	215	4.03324	0.885956
ButylAmino_10mms_0g_run1	2	216	4.03437	0.918302
ButylAmino_10mms_0g_run1	2	217	4.03551	0.905803
ButylAmino_10mms_0g_run1	2	218	4.03664	0.92465
ButylAmino_10mms_0g_run1	2	219	4.04111	0.932311
ButylAmino_10mms_0g_run1	2	220	4.04225	0.908369
ButylAmino_10mms_0g_run1	2	221	4.04338	0.91552
ButylAmino_10mms_0g_run1	2	222	4.04452	0.928471
ButylAmino_10mms_0g_run1	2	223	4.04565	0.921045
ButylAmino_10mms_0g_run1	2	224	4.05011	0.912719
ButylAmino_10mms_0g_run1	2	225	4.05125	0.907625
ButylAmino_10mms_0g_run1	2	226	4.05238	0.926629
ButylAmino_10mms_0g_run1	2	227	4.05352	0.929372
ButylAmino_10mms_0g_run1	2	228	4.05465	0.911171
ButylAmino_10mms_0g_run1	2	229	4.05911	0.932389
ButylAmino_10mms_0g_run1	2	230	4.06025	0.924004
ButylAmino_10mms_0g_run1	2	231	4.06138	0.932154
ButylAmino_10mms_0g_run1	2	232	4.06251	0.913659
ButylAmino_10mms_0g_run1	2	233	4.06365	0.93088
ButylAmino_10mms_0g_run1	2	234	4.06811	0.914286
ButylAmino_10mms_0g_run1	2	235	4.06924	0.916931
ButylAmino_10mms_0g_run1	2	236	4.07038	0.913659
ButylAmino_10mms_0g_run1	2	237	4.07151	0.906273
ButylAmino_10mms_0g_run1	2	238	4.07265	0.902707
ButylAmino_10mms_0g_run1	2	239	4.07711	0.848907
ButylAmino_10mms_0g_run1	2	240	4.07825	0.813583
ButylAmino_10mms_0g_run1	2	241	4.07938	0.804492
ButylAmino_10mms_0g_run1	2	242	4.08051	0.799908
ButylAmino_10mms_0g_run1	2	243	4.08165	0.784763
ButylAmino_10mms_0g_run1	2	244	4.08611	0.767228
ButylAmino_10mms_0g_run1	2	245	4.08725	0.759176
ButylAmino_10mms_0g_run1	2	246	4.08838	0.76233
ButylAmino_10mms_0g_run1	2	247	4.08951	0.771362
ButylAmino_10mms_0g_run1	2	248	4.09065	0.782941
ButylAmino_10mms_0g_run1	2	249	4.09511	0.774282
ButylAmino_10mms_0g_run1	2	250	4.09624	0.749517
ButylAmino_10mms_0g_run1	2	251	4.09738	0.768953
ButylAmino_10mms_0g_run1	2	252	4.09851	0.731747
ButylAmino_10mms_0g_run1	2	253	4.09965	0.733785
ButylAmino_10mms_0g_run1	2	254	4.10411	0.714742
ButylAmino_10mms_0g_run1	2	255	4.10525	0.737625
ButylAmino_10mms_0g_run1	2	256	4.10638	0.712998
ButylAmino_10mms_0g_run1	2	257	4.10751	0.743796
ButylAmino_10mms_0g_run1	2	258	4.10864	0.744894
ButylAmino_10mms_0g_run1	2	259	4.11311	0.730807
ButylAmino_10mms_0g_run1	2	260	4.11425	0.706376
ButylAmino_10mms_0g_run1	2	261	4.11539	0.684923
ButylAmino_10mms_0g_run1	2	262	4.11652	0.696678
ButylAmino_10mms_0g_run1	2	263	4.11766	0.694699
ButylAmino_10mms_0g_run1	2	264	4.12211	0.703222
ButylAmino_10mms_0g_run1	2	265	4.12325	0.699519
ButylAmino_10mms_0g_run1	2	266	4.12438	0.729985
ButylAmino_10mms_0g_run1	2	267	4.12552	0.689194
ButylAmino_10mms_0g_run1	2	268	4.12665	0.707591
ButylAmino_10mms_0g_run1	3	1	4.72626	0.575775
ButylAmino_10mms_0g_run1	3	2	4.7274	0.57358
ButylAmino_10mms_0g_run1	3	3	4.72853	0.576284
ButylAmino_10mms_0g_run1	3	4	4.72966	0.56978
ButylAmino_10mms_0g_run1	3	5	4.73414	0.58463
ButylAmino_10mms_0g_run1	3	6	4.73528	0.574521
ButylAmino_10mms_0g_run1	3	7	4.73641	0.555948
ButylAmino_10mms_0g_run1	3	8	4.73755	0.583043
ButylAmino_10mms_0g_run1	3	9	4.73868	0.559631
ButylAmino_10mms_0g_run1	3	10	4.74314	0.588647
ButylAmino_10mms_0g_run1	3	11	4.74428	0.555046
ButylAmino_10mms_0g_run1	3	12	4.74541	0.582103
ButylAmino_10mms_0g_run1	3	13	4.74654	0.567448
ButylAmino_10mms_0g_run1	3	14	4.74767	0.563236
ButylAmino_10mms_0g_run1	3	15	4.75214	0.561022
ButylAmino_10mms_0g_run1	3	16	4.75327	0.574109
ButylAmino_10mms_0g_run1	3	17	4.75441	0.572111
ButylAmino_10mms_0g_run1	3	18	4.75554	0.564784
ButylAmino_10mms_0g_run1	3	19	4.75667	0.575069
ButylAmino_10mms_0g_run1	3	20	4.76115	0.580712
ButylAmino_10mms_0g_run1	3	21	4.76228	0.595014
ButylAmino_10mms_0g_run1	3	22	4.76342	0.589842
ButylAmino_10mms_0g_run1	3	23	4.76455	0.623991
ButylAmino_10mms_0g_run1	3	24	4.76568	0.588079
ButylAmino_10mms_0g_run1	3	25	4.77015	0.735293
ButylAmino_10mms_0g_run1	3	26	4.77128	0.753454
ButylAmino_10mms_0g_run1	3	27	4.77241	0.78537
ButylAmino_10mms_0g_run1	3	28	4.77355	0.819616
ButylAmino_10mms_0g_run1	3	29	4.77468	0.831587
ButylAmino_10mms_0g_run1	3	30	4.77914	0.846026
ButylAmino_10mms_0g_run1	3	31	4.78028	0.837445
ButylAmino_10mms_0g_run1	3	32	4.78141	0.853021
ButylAmino_10mms_0g_run1	3	33	4.78255	0.828276
ButylAmino_10mms_0g_run1	3	34	4.78368	0.840913
ButylAmino_10mms_0g_run1	3	35	4.78814	0.878588
ButylAmino_10mms_0g_run1	3	36	4.78927	0.904293
ButylAmino_10mms_0g_run1	3	37	4.79041	0.904352
ButylAmino_10mms_0g_run1	3	38	4.79154	0.901041
ButylAmino_10mms_0g_run1	3	39	4.79267	0.908388
ButylAmino_10mms_0g_run1	3	40	4.79715	0.870458
ButylAmino_10mms_0g_run1	3	41	4.79828	0.86603
ButylAmino_10mms_0g_run1	3	42	4.79941	0.834761
ButylAmino_10mms_0g_run1	3	43	4.80055	0.874591
ButylAmino_10mms_0g_run1	3	44	4.80168	0.850826
ButylAmino_10mms_0g_run1	3	45	4.80615	0.891695
ButylAmino_10mms_0g_run1	3	46	4.80728	0.908721
ButylAmino_10mms_0g_run1	3	47	4.80841	0.913364
ButylAmino_10mms_0g_run1	3	48	4.80955	0.897828
ButylAmino_10mms_0g_run1	3	49	4.81068	0.877903
ButylAmino_10mms_0g_run1	3	50	4.81514	0.86748
ButylAmino_10mms_0g_run1	3	51	4.81628	0.864756
ButylAmino_10mms_0g_run1	3	52	4.81741	0.895163
ButylAmino_10mms_0g_run1	3	53	4.81854	0.868224
ButylAmino_10mms_0g_run1	3	54	4.81968	0.877315
ButylAmino_10mms_0g_run1	3	55	4.82415	0.905351
ButylAmino_10mms_0g_run1	3	56	4.82528	0.909818
ButylAmino_10mms_0g_run1	3	57	4.82641	0.882252
ButylAmino_10mms_0g_run1	3	58	4.82755	0.893674
ButylAmino_10mms_0g_run1	3	59	4.82868	0.882919
ButylAmino_10mms_0g_run1	3	60	4.83315	0.867618
ButylAmino_10mms_0g_run1	3	61	4.83428	0.863347
ButylAmino_10mms_0g_run1	3	62	4.83542	0.874926
ButylAmino_10mms_0g_run1	3	63	4.83655	0.873789
ButylAmino_10mms_0g_run1	3	64	4.83768	0.86895
ButylAmino_10mms_0g_run1	3	65	4.84215	0.875612
ButylAmino_10mms_0g_run1	3	66	4.84328	0.858762
ButylAmino_10mms_0g_run1	3	67	4.84441	0.870518
ButylAmino_10mms_0g_run1	3	68	4.84555	0.862759
ButylAmino_10mms_0g_run1	3	69	4.84669	0.861603
ButylAmino_10mms_0g_run1	3	70	4.85115	0.838406
ButylAmino_10mms_0g_run1	3	71	4.85228	0.8733
ButylAmino_10mms_0g_run1	3	72	4.85341	0.874926
ButylAmino_10mms_0g_run1	3	73	4.85455	0.859997
ButylAmino_10mms_0g_run1	3	74	4.85568	0.88239
ButylAmino_10mms_0g_run1	3	75	4.86011	0.881156
ButylAmino_10mms_0g_run1	3	76	4.86122	0.871576
ButylAmino_10mms_0g_run1	3	77	4.86232	0.876023
ButylAmino_10mms_0g_run1	3	78	4.86342	0.869871
ButylAmino_10mms_0g_run1	3	79	4.86453	0.867011
ButylAmino_10mms_0g_run1	3	80	4.86913	0.874573
ButylAmino_10mms_0g_run1	3	81	4.87027	0.875572
ButylAmino_10mms_0g_run1	3	82	4.8714	0.858527
ButylAmino_10mms_0g_run1	3	83	4.87253	0.881979
ButylAmino_10mms_0g_run1	3	84	4.87367	0.877218
ButylAmino_10mms_0g_run1	3	85	4.87815	0.851944
ButylAmino_10mms_0g_run1	3	86	4.87928	0.872692
ButylAmino_10mms_0g_run1	3	87	4.88042	0.858449
ButylAmino_10mms_0g_run1	3	88	4.88155	0.86129
ButylAmino_10mms_0g_run1	3	89	4.88269	0.849515
ButylAmino_10mms_0g_run1	3	90	4.88715	0.868891
ButylAmino_10mms_0g_run1	3	91	4.88828	0.873652
ButylAmino_10mms_0g_run1	3	92	4.88942	0.86944
ButylAmino_10mms_0g_run1	3	93	4.89055	0.895066
ButylAmino_10mms_0g_run1	3	94	4.89168	0.889032
ButylAmino_10mms_0g_run1	3	95	4.89615	0.876846
ButylAmino_10mms_0g_run1	3	96	4.89728	0.876826
ButylAmino_10mms_0g_run1	3	97	4.89842	0.869107
ButylAmino_10mms_0g_run1	3	98	4.89955	0.855686
ButylAmino_10mms_0g_run1	3	99	4.90069	0.883683
ButylAmino_10mms_0g_run1	3	100	4.90515	0.865032
ButylAmino_10mms_0g_run1	3	101	4.90629	0.87087
ButylAmino_10mms_0g_run1	3	102	4.90742	0.891716
ButylAmino_10mms_0g_run1	3	103	4.90856	0.885192
ButylAmino_10mms_0g_run1	3	104	4.90969	0.896614
ButylAmino_10mms_0g_run1	3	105	4.91415	0.866756
ButylAmino_10mms_0g_run1	3	106	4.91529	0.870518
ButylAmino_10mms_0g_run1	3	107	4.91642	0.850847
ButylAmino_10mms_0g_run1	3	108	4.91756	0.888934
ButylAmino_10mms_0g_run1	3	109	4.91869	0.868833
ButylAmino_10mms_0g_run1	3	110	4.92315	0.867226
ButylAmino_10mms_0g_run1	3	111	4.92429	0.889835
ButylAmino_10mms_0g_run1	3	112	4.92542	0.87571
ButylAmino_10mms_0g_run1	3	113	4.92655	0.877845
ButylAmino_10mms_0g_run1	3	114	4.92768	0.854335
ButylAmino_10mms_0g_run1	3	115	4.93215	0.87522
ButylAmino_10mms_0g_run1	3	116	4.93328	0.85455
ButylAmino_10mms_0g_run1	3	117	4.93442	0.877512
ButylAmino_10mms_0g_run1	3	118	4.93555	0.879745
ButylAmino_10mms_0g_run1	3	119	4.93668	0.877923
ButylAmino_10mms_0g_run1	3	120	4.94115	0.88915
ButylAmino_10mms_0g_run1	3	121	4.94228	0.899533
ButylAmino_10mms_0g_run1	3	122	4.94342	0.884487
ButylAmino_10mms_0g_run1	3	123	4.94455	0.878237
ButylAmino_10mms_0g_run1	3	124	4.94568	0.890149
ButylAmino_10mms_0g_run1	3	125	4.95015	0.868735
ButylAmino_10mms_0g_run1	3	126	4.95128	0.865776
ButylAmino_10mms_0g_run1	3	127	4.95242	0.868029
ButylAmino_10mms_0g_run1	3	128	4.95355	0.873025
ButylAmino_10mms_0g_run1	3	129	4.95468	0.874789
ButylAmino_10mms_0g_run1	3	130	4.95915	0.862387
ButylAmino_10mms_0g_run1	3	131	4.96029	0.873378
ButylAmino_10mms_0g_run1	3	132	4.96142	0.873594
ButylAmino_10mms_0g_run1	3	133	4.96255	0.881803
ButylAmino_10mms_0g_run1	3	134	4.96368	0.870263
ButylAmino_10mms_0g_run1	3	135	4.96815	0.878139
ButylAmino_10mms_0g_run1	3	136	4.96928	0.87522
ButylAmino_10mms_0g_run1	3	137	4.97042	0.892872
ButylAmino_10mms_0g_run1	3	138	4.97155	0.874749
ButylAmino_10mms_0g_run1	3	139	4.97269	0.884879
ButylAmino_10mms_0g_run1	3	140	4.97715	0.875377
ButylAmino_10mms_0g_run1	3	141	4.97829	0.883645
ButylAmino_10mms_0g_run1	3	142	4.97942	0.871067
ButylAmino_10mms_0g_run1	3	143	4.98056	0.878081
ButylAmino_10mms_0g_run1	3	144	4.98169	0.891717
ButylAmino_10mms_0g_run1	3	145	4.98615	0.886662
ButylAmino_10mms_0g_run1	3	146	4.98729	0.878257
ButylAmino_10mms_0g_run1	3	147	4.98842	0.876121
ButylAmino_10mms_0g_run1	3	148	4.98956	0.904843
ButylAmino_10mms_0g_run1	3	149	4.99069	0.910662
ButylAmino_10mms_0g_run1	3	150	4.99515	0.884017
ButylAmino_10mms_0g_run1	3	151	4.99629	0.876396
ButylAmino_10mms_0g_run1	3	152	4.99742	0.907234
ButylAmino_10mms_0g_run1	3	153	4.99856	0.870577
ButylAmino_10mms_0g_run1	3	154	4.99969	0.877101
ButylAmino_10mms_0g_run1	3	155	5.00412	0.883664
ButylAmino_10mms_0g_run1	3	156	5.00522	0.910564
ButylAmino_10mms_0g_run1	3	157	5.00632	0.890639
ButylAmino_10mms_0g_run1	3	158	5.00742	0.923064
ButylAmino_10mms_0g_run1	3	159	5.00853	0.919792
ButylAmino_10mms_0g_run1	3	160	5.01314	0.896556
ButylAmino_10mms_0g_run1	3	161	5.01428	0.913052
ButylAmino_10mms_0g_run1	3	162	5.01541	0.898515
ButylAmino_10mms_0g_run1	3	163	5.01655	0.877944
ButylAmino_10mms_0g_run1	3	164	5.01768	0.912778
ButylAmino_10mms_0g_run1	3	165	5.02216	0.906489
ButylAmino_10mms_0g_run1	3	166	5.02329	0.889718
ButylAmino_10mms_0g_run1	3	167	5.02442	0.919204
ButylAmino_10mms_0g_run1	3	168	5.02556	0.910486
ButylAmino_10mms_0g_run1	3	169	5.02669	0.881078
ButylAmino_10mms_0g_run1	3	170	5.03116	0.877728
ButylAmino_10mms_0g_run1	3	171	5.03229	0.855001
ButylAmino_10mms_0g_run1	3	172	5.03342	0.880295
ButylAmino_10mms_0g_run1	3	173	5.03456	0.86901
ButylAmino_10mms_0g_run1	3	174	5.03569	0.892167
ButylAmino_10mms_0g_run1	3	175	5.04015	0.889973
ButylAmino_10mms_0g_run1	3	176	5.04129	0.931097
ButylAmino_10mms_0g_run1	3	177	5.04242	0.883488
ButylAmino_10mms_0g_run1	3	178	5.04355	0.897085
ButylAmino_10mms_0g_run1	3	179	5.04469	0.912935
ButylAmino_10mms_0g_run1	3	180	5.04916	0.888641
ButylAmino_10mms_0g_run1	3	181	5.05029	0.880353
ButylAmino_10mms_0g_run1	3	182	5.05143	0.878375
ButylAmino_10mms_0g_run1	3	183	5.05256	0.905137
ButylAmino_10mms_0g_run1	3	184	5.05369	0.885663
ButylAmino_10mms_0g_run1	3	185	5.05816	0.927061
ButylAmino_10mms_0g_run1	3	186	5.05929	0.887211
ButylAmino_10mms_0g_run1	3	187	5.06043	0.916461
ButylAmino_10mms_0g_run1	3	188	5.06156	0.896262
ButylAmino_10mms_0g_run1	3	189	5.0627	0.910153
ButylAmino_10mms_0g_run1	3	190	5.06716	0.87716
ButylAmino_10mms_0g_run1	3	191	5.06829	0.918675
ButylAmino_10mms_0g_run1	3	192	5.06942	0.905921
ButylAmino_10mms_0g_run1	3	193	5.07056	0.903805
ButylAmino_10mms_0g_run1	3	194	5.07169	0.913934
ButylAmino_10mms_0g_run1	3	195	5.07616	0.923064
ButylAmino_10mms_0g_run1	3	196	5.07729	0.910897
ButylAmino_10mms_0g_run1	3	197	5.07843	0.89924
ButylAmino_10mms_0g_run1	3	198	5.07956	0.91701
ButylAmino_10mms_0g_run1	3	199	5.0807	0.900886
ButylAmino_10mms_0g_run1	3	200	5.08516	0.910388
ButylAmino_10mms_0g_run1	3	201	5.08629	0.901395
ButylAmino_10mms_0g_run1	3	202	5.08743	0.919753
ButylAmino_10mms_0g_run1	3	203	5.08856	0.907038
ButylAmino_10mms_0g_run1	3	204	5.0897	0.921105
ButylAmino_10mms_0g_run1	3	205	5.09416	0.90692
ButylAmino_10mms_0g_run1	3	206	5.09529	0.915482
ButylAmino_10mms_0g_run1	3	207	5.09643	0.907214
ButylAmino_10mms_0g_run1	3	208	5.09756	0.899828
ButylAmino_10mms_0g_run1	3	209	5.0987	0.886407
ButylAmino_10mms_0g_run1	3	210	5.10316	0.873065
ButylAmino_10mms_0g_run1	3	211	5.10429	0.898554
ButylAmino_10mms_0g_run1	3	212	5.10543	0.882842
ButylAmino_10mms_0g_run1	3	213	5.10656	0.887348
ButylAmino_10mms_0g_run1	3	214	5.1077	0.907214
ButylAmino_10mms_0g_run1	3	215	5.11216	0.898319
ButylAmino_10mms_0g_run1	3	216	5.11329	0.893539
ButylAmino_10mms_0g_run1	3	217	5.11442	0.880157
ButylAmino_10mms_0g_run1	3	218	5.11556	0.8858
ButylAmino_10mms_0g_run1	3	219	5.11669	0.870067
ButylAmino_10mms_0g_run1	3	220	5.12116	0.908663
ButylAmino_10mms_0g_run1	3	221	5.12229	0.8954
ButylAmino_10mms_0g_run1	3	222	5.12343	0.922887
ButylAmino_10mms_0g_run1	3	223	5.12456	0.913875
ButylAmino_10mms_0g_run1	3	224	5.1257	0.921947
ButylAmino_10mms_0g_run1	3	225	5.13016	0.882704
ButylAmino_10mms_0g_run1	3	226	5.1313	0.903354
ButylAmino_10mms_0g_run1	3	227	5.13243	0.852219
ButylAmino_10mms_0g_run1	3	228	5.13357	0.88721
ButylAmino_10mms_0g_run1	3	229	5.1347	0.888464
ButylAmino_10mms_0g_run1	3	230	5.13916	0.906391
ButylAmino_10mms_0g_run1	3	231	5.1403	0.902335
ButylAmino_10mms_0g_run1	3	232	5.14143	0.920987
ButylAmino_10mms_0g_run1	3	233	5.14257	0.896438
ButylAmino_10mms_0g_run1	3	234	5.1437	0.890815
ButylAmino_10mms_0g_run1	3	235	5.14813	0.902198
ButylAmino_10mms_0g_run1	3	236	5.14923	0.88868
ButylAmino_10mms_0g_run1	3	237	5.15033	0.888111
ButylAmino_10mms_0g_run1	3	238	5.15143	0.896614
ButylAmino_10mms_0g_run1	3	239	5.15254	0.888405
ButylAmino_10mms_0g_run1	3	240	5.15715	0.913542
ButylAmino_10mms_0g_run1	3	241	5.15828	0.907547
ButylAmino_10mms_0g_run1	3	242	5.15942	0.913953
ButylAmino_10mms_0g_run1	3	243	5.16055	0.890129
ButylAmino_10mms_0g_run1	3	244	5.16168	0.870929
ButylAmino_10mms_0g_run1	3	245	5.16616	0.807432
ButylAmino_10mms_0g_run1	3	246	5.1673	0.806276
ButylAmino_10mms_0g_run1	3	247	5.16843	0.787565
ButylAmino_10mms_0g_run1	3	248	5.16957	0.785449
ButylAmino_10mms_0g_run1	3	249	5.17071	0.768816
ButylAmino_10mms_0g_run1	3	250	5.17516	0.781257
ButylAmino_10mms_0g_run1	3	251	5.1763	0.760254
ButylAmino_10mms_0g_run1	3	252	5.17743	0.747167
ButylAmino_10mms_0g_run1	3	253	5.17857	0.772421
ButylAmino_10mms_0g_run1	3	254	5.17971	0.756238
ButylAmino_10mms_0g_run1	3	255	5.18416	0.764936
ButylAmino_10mms_0g_run1	3	256	5.18529	0.7302
ButylAmino_10mms_0g_run1	3	257	5.18643	0.745776
ButylAmino_10mms_0g_run1	3	258	5.18756	0.72058
ButylAmino_10mms_0g_run1	3	259	5.1887	0.729436
ButylAmino_10mms_0g_run1	3	260	5.19317	0.706376
ButylAmino_10mms_0g_run1	3	261	5.1943	0.719914
ButylAmino_10mms_0g_run1	3	262	5.19544	0.691094
ButylAmino_10mms_0g_run1	3	263	5.19657	0.713076
ButylAmino_10mms_0g_run1	3	264	5.1977	0.706533
ButylAmino_10mms_0g_run1	3	265	5.20217	0.705181
ButylAmino_10mms_0g_run1	3	266	5.2033	0.690722
ButylAmino_10mms_0g_run1	3	267	5.20443	0.692191
ButylAmino_10mms_0g_run1	3	268	5.20557	0.69946
ButylAmino_10mms_0g_run2	1	1	2.89235	0.588686
ButylAmino_10mms_0g_run2	1	2	2.89348	0.588784
ButylAmino_10mms_0g_run2	1	3	2.89794	0.588118
ButylAmino_10mms_0g_run2	1	4	2.89908	0.539216
ButylAmino_10mms_0g_run2	1	5	2.90021	0.560591
ButylAmino_10mms_0g_run2	1	6	2.90135	0.575579
ButylAmino_10mms_0g_run2	1	7	2.90248	0.563197
ButylAmino_10mms_0g_run2	1	8	2.90695	0.577969
ButylAmino_10mms_0g_run2	1	9	2.90808	0.590136
ButylAmino_10mms_0g_run2	1	10	2.90922	0.572013
ButylAmino_10mms_0g_run2	1	11	2.91035	0.566351
ButylAmino_10mms_0g_run2	1	12	2.91149	0.584905
ButylAmino_10mms_0g_run2	1	13	2.91595	0.54817
ButylAmino_10mms_0g_run2	1	14	2.91708	0.567605
ButylAmino_10mms_0g_run2	1	15	2.91821	0.571464
ButylAmino_10mms_0g_run2	1	16	2.91935	0.576558
ButylAmino_10mms_0g_run2	1	17	2.92049	0.576735
ButylAmino_10mms_0g_run2	1	18	2.92494	0.591527
ButylAmino_10mms_0g_run2	1	19	2.92608	0.586002
ButylAmino_10mms_0g_run2	1	20	2.92722	0.572346
ButylAmino_10mms_0g_run2	1	21	2.92835	0.575363
ButylAmino_10mms_0g_run2	1	22	2.92948	0.572052
ButylAmino_10mms_0g_run2	1	23	2.93395	0.597365
ButylAmino_10mms_0g_run2	1	24	2.93508	0.599246
ButylAmino_10mms_0g_run2	1	25	2.93621	0.617897
ButylAmino_10mms_0g_run2	1	26	2.93735	0.656298
ButylAmino_10mms_0g_run2	1	27	2.93848	0.672362
ButylAmino_10mms_0g_run2	1	28	2.94295	0.780783
ButylAmino_10mms_0g_run2	1	29	2.94409	0.80016
ButylAmino_10mms_0g_run2	1	30	2.94522	0.820457
ButylAmino_10mms_0g_run2	1	31	2.94636	0.821868
ButylAmino_10mms_0g_run2	1	32	2.94749	0.844614
ButylAmino_10mms_0g_run2	1	33	2.95195	0.856526
ButylAmino_10mms_0g_run2	1	34	2.95309	0.886834
ButylAmino_10mms_0g_run2	1	35	2.95422	0.872395
ButylAmino_10mms_0g_run2	1	36	2.95536	0.896689
ButylAmino_10mms_0g_run2	1	37	2.95649	0.903076
ButylAmino_10mms_0g_run2	1	38	2.96095	0.94898
ButylAmino_10mms_0g_run2	1	39	2.96208	0.908464
ButylAmino_10mms_0g_run2	1	40	2.96321	0.931563
ButylAmino_10mms_0g_run2	1	41	2.96435	0.931563
ButylAmino_10mms_0g_run2	1	42	2.96548	0.905878
ButylAmino_10mms_0g_run2	1	43	2.96992	0.902684
ButylAmino_10mms_0g_run2	1	44	2.97102	0.915968
ButylAmino_10mms_0g_run2	1	45	2.97212	0.915791
ButylAmino_10mms_0g_run2	1	46	2.97323	0.931465
ButylAmino_10mms_0g_run2	1	47	2.97433	0.936813
ButylAmino_10mms_0g_run2	1	48	2.97894	0.939086
ButylAmino_10mms_0g_run2	1	49	2.98007	0.921101
ButylAmino_10mms_0g_run2	1	50	2.9812	0.952526
ButylAmino_10mms_0g_run2	1	51	2.98234	0.877704
ButylAmino_10mms_0g_run2	1	52	2.98347	0.9144
ButylAmino_10mms_0g_run2	1	53	2.98795	0.909639
ButylAmino_10mms_0g_run2	1	54	2.98908	0.901842
ButylAmino_10mms_0g_run2	1	55	2.99022	0.898746
ButylAmino_10mms_0g_run2	1	56	2.99135	0.918945
ButylAmino_10mms_0g_run2	1	57	2.99248	0.887481
ButylAmino_10mms_0g_run2	1	58	2.99695	0.896669
ButylAmino_10mms_0g_run2	1	59	2.99809	0.865891
ButylAmino_10mms_0g_run2	1	60	2.99922	0.836816
ButylAmino_10mms_0g_run2	1	61	3.00036	0.838893
ButylAmino_10mms_0g_run2	1	62	3.00149	0.85245
ButylAmino_10mms_0g_run2	1	63	3.00595	0.850472
ButylAmino_10mms_0g_run2	1	64	3.00708	0.858073
ButylAmino_10mms_0g_run2	1	65	3.00822	0.882759
ButylAmino_10mms_0g_run2	1	66	3.00936	0.85874
ButylAmino_10mms_0g_run2	1	67	3.01049	0.854155
ButylAmino_10mms_0g_run2	1	68	3.01496	0.837952
ButylAmino_10mms_0g_run2	1	69	3.01609	0.827157
ButylAmino_10mms_0g_run2	1	70	3.01723	0.83709
ButylAmino_10mms_0g_run2	1	71	3.01837	0.8376
ButylAmino_10mms_0g_run2	1	72	3.0195	0.83519
ButylAmino_10mms_0g_run2	1	73	3.02395	0.872532
ButylAmino_10mms_0g_run2	1	74	3.02509	0.858191
ButylAmino_10mms_0g_run2	1	75	3.02622	0.849081
ButylAmino_10mms_0g_run2	1	76	3.02735	0.848944
ButylAmino_10mms_0g_run2	1	77	3.02848	0.836503
ButylAmino_10mms_0g_run2	1	78	3.03295	0.835856
ButylAmino_10mms_0g_run2	1	79	3.03408	0.845711
ButylAmino_10mms_0g_run2	1	80	3.03522	0.854214
ButylAmino_10mms_0g_run2	1	81	3.03635	0.844614
ButylAmino_10mms_0g_run2	1	82	3.03749	0.857466
ButylAmino_10mms_0g_run2	1	83	3.04195	0.867909
ButylAmino_10mms_0g_run2	1	84	3.04309	0.87647
ButylAmino_10mms_0g_run2	1	85	3.04422	0.850511
ButylAmino_10mms_0g_run2	1	86	3.04536	0.8779
ButylAmino_10mms_0g_run2	1	87	3.04649	0.853038
ButylAmino_10mms_0g_run2	1	88	3.05096	0.891478
ButylAmino_10mms_0g_run2	1	89	3.05209	0.861953
ButylAmino_10mms_0g_run2	1	90	3.05323	0.879135
ButylAmino_10mms_0g_run2	1	91	3.05436	0.8693
ButylAmino_10mms_0g_run2	1	92	3.05549	0.86497
ButylAmino_10mms_0g_run2	1	93	3.05996	0.881525
ButylAmino_10mms_0g_run2	1	94	3.06109	0.872709
ButylAmino_10mms_0g_run2	1	95	3.06223	0.868026
ButylAmino_10mms_0g_run2	1	96	3.06337	0.861698
ButylAmino_10mms_0g_run2	1	97	3.0645	0.882367
ButylAmino_10mms_0g_run2	1	98	3.06895	0.862952
ButylAmino_10mms_0g_run2	1	99	3.07009	0.857035
ButylAmino_10mms_0g_run2	1	100	3.07122	0.865714
ButylAmino_10mms_0g_run2	1	101	3.07236	0.854449
ButylAmino_10mms_0g_run2	1	102	3.07349	0.876882
ButylAmino_10mms_0g_run2	1	103	3.07796	0.842811
ButylAmino_10mms_0g_run2	1	104	3.07909	0.862188
ButylAmino_10mms_0g_run2	1	105	3.08023	0.852019
ButylAmino_10mms_0g_run2	1	106	3.08137	0.858779
ButylAmino_10mms_0g_run2	1	107	3.0825	0.811698
ButylAmino_10mms_0g_run2	1	108	3.08696	0.843555
ButylAmino_10mms_0g_run2	1	109	3.08809	0.848786
ButylAmino_10mms_0g_run2	1	110	3.08922	0.870141
ButylAmino_10mms_0g_run2	1	111	3.09036	0.864459
ButylAmino_10mms_0g_run2	1	112	3.09149	0.871493
ButylAmino_10mms_0g_run2	1	113	3.09596	0.865027
ButylAmino_10mms_0g_run2	1	114	3.09709	0.878702
ButylAmino_10mms_0g_run2	1	115	3.09822	0.87739
ButylAmino_10mms_0g_run2	1	116	3.09936	0.8481
ButylAmino_10mms_0g_run2	1	117	3.10049	0.872688
ButylAmino_10mms_0g_run2	1	118	3.10496	0.887382
ButylAmino_10mms_0g_run2	1	119	3.10609	0.896296
ButylAmino_10mms_0g_run2	1	120	3.10723	0.883698
ButylAmino_10mms_0g_run2	1	121	3.10836	0.916476
ButylAmino_10mms_0g_run2	1	122	3.1095	0.902134
ButylAmino_10mms_0g_run2	1	123	3.11392	0.898627
ButylAmino_10mms_0g_run2	1	124	3.11502	0.871297
ButylAmino_10mms_0g_run2	1	125	3.11613	0.876156
ButylAmino_10mms_0g_run2	1	126	3.11723	0.875979
ButylAmino_10mms_0g_run2	1	127	3.11834	0.863009
ButylAmino_10mms_0g_run2	1	128	3.12294	0.882484
ButylAmino_10mms_0g_run2	1	129	3.12408	0.906327
ButylAmino_10mms_0g_run2	1	130	3.12522	0.890164
ButylAmino_10mms_0g_run2	1	131	3.12635	0.886206
ButylAmino_10mms_0g_run2	1	132	3.12749	0.861187
ButylAmino_10mms_0g_run2	1	133	3.13196	0.870415
ButylAmino_10mms_0g_run2	1	134	3.13309	0.868554
ButylAmino_10mms_0g_run2	1	135	3.13422	0.898098
ButylAmino_10mms_0g_run2	1	136	3.13536	0.873158
ButylAmino_10mms_0g_run2	1	137	3.1365	0.892221
ButylAmino_10mms_0g_run2	1	138	3.14095	0.889439
ButylAmino_10mms_0g_run2	1	139	3.14209	0.896081
ButylAmino_10mms_0g_run2	1	140	3.14322	0.868319
ButylAmino_10mms_0g_run2	1	141	3.14436	0.87788
ButylAmino_10mms_0g_run2	1	142	3.14549	0.876998
ButylAmino_10mms_0g_run2	1	143	3.14996	0.865282
ButylAmino_10mms_0g_run2	1	144	3.15109	0.859796
ButylAmino_10mms_0g_run2	1	145	3.15222	0.880779
ButylAmino_10mms_0g_run2	1	146	3.15336	0.885775
ButylAmino_10mms_0g_run2	1	147	3.15449	0.868534
ButylAmino_10mms_0g_run2	1	148	3.15896	0.881387
ButylAmino_10mms_0g_run2	1	149	3.1601	0.884051
ButylAmino_10mms_0g_run2	1	150	3.16123	0.884521
ButylAmino_10mms_0g_run2	1	151	3.16237	0.860502
ButylAmino_10mms_0g_run2	1	152	3.1635	0.890869
ButylAmino_10mms_0g_run2	1	153	3.16796	0.866967
ButylAmino_10mms_0g_run2	1	154	3.1691	0.900214
ButylAmino_10mms_0g_run2	1	155	3.17023	0.875078
ButylAmino_10mms_0g_run2	1	156	3.17137	0.901684
ButylAmino_10mms_0g_run2	1	157	3.1725	0.88552
ButylAmino_10mms_0g_run2	1	158	3.17696	0.904956
ButylAmino_10mms_0g_run2	1	159	3.17809	0.901605
ButylAmino_10mms_0g_run2	1	160	3.17922	0.891927
ButylAmino_10mms_0g_run2	1	161	3.18036	0.903192
ButylAmino_10mms_0g_run2	1	162	3.18149	0.896707
ButylAmino_10mms_0g_run2	1	163	3.18596	0.902801
ButylAmino_10mms_0g_run2	1	164	3.18709	0.882053
ButylAmino_10mms_0g_run2	1	165	3.18823	0.905426
ButylAmino_10mms_0g_run2	1	166	3.18936	0.907307
ButylAmino_10mms_0g_run2	1	167	3.1905	0.90045
ButylAmino_10mms_0g_run2	1	168	3.19496	0.899294
ButylAmino_10mms_0g_run2	1	169	3.1961	0.907463
ButylAmino_10mms_0g_run2	1	170	3.19723	0.909991
ButylAmino_10mms_0g_run2	1	171	3.19837	0.89612
ButylAmino_10mms_0g_run2	1	172	3.1995	0.888538
ButylAmino_10mms_0g_run2	1	173	3.20396	0.898627
ButylAmino_10mms_0g_run2	1	174	3.2051	0.909305
ButylAmino_10mms_0g_run2	1	175	3.20623	0.881759
ButylAmino_10mms_0g_run2	1	176	3.20736	0.930817
ButylAmino_10mms_0g_run2	1	177	3.2085	0.908541
ButylAmino_10mms_0g_run2	1	178	3.21296	0.912773
ButylAmino_10mms_0g_run2	1	179	3.21409	0.891241
ButylAmino_10mms_0g_run2	1	180	3.21523	0.896609
ButylAmino_10mms_0g_run2	1	181	3.21636	0.884521
ButylAmino_10mms_0g_run2	1	182	3.2175	0.904309
ButylAmino_10mms_0g_run2	1	183	3.22196	0.887382
ButylAmino_10mms_0g_run2	1	184	3.22309	0.898608
ButylAmino_10mms_0g_run2	1	185	3.22423	0.935382
ButylAmino_10mms_0g_run2	1	186	3.22536	0.914575
ButylAmino_10mms_0g_run2	1	187	3.22649	0.905133
ButylAmino_10mms_0g_run2	1	188	3.23096	0.898002
ButylAmino_10mms_0g_run2	1	189	3.2321	0.908914
ButylAmino_10mms_0g_run2	1	190	3.23323	0.885189
ButylAmino_10mms_0g_run2	1	191	3.23436	0.92255
ButylAmino_10mms_0g_run2	1	192	3.2355	0.900098
ButylAmino_10mms_0g_run2	1	193	3.23996	0.92257
ButylAmino_10mms_0g_run2	1	194	3.2411	0.926665
ButylAmino_10mms_0g_run2	1	195	3.24224	0.935736
ButylAmino_10mms_0g_run2	1	196	3.24337	0.915889
ButylAmino_10mms_0g_run2	1	197	3.24451	0.91583
ButylAmino_10mms_0g_run2	1	198	3.24896	0.902763
ButylAmino_10mms_0g_run2	1	199	3.2501	0.879644
ButylAmino_10mms_0g_run2	1	200	3.25123	0.89955
ButylAmino_10mms_0g_run2	1	201	3.25237	0.894906
ButylAmino_10mms_0g_run2	1	202	3.2535	0.90531
ButylAmino_10mms_0g_run2	1	203	3.25793	0.912539
ButylAmino_10mms_0g_run2	1	204	3.25903	0.908131
ButylAmino_10mms_0g_run2	1	205	3.26014	0.899354
ButylAmino_10mms_0g_run2	1	206	3.26124	0.903292
ButylAmino_10mms_0g_run2	1	207	3.26234	0.901215
ButylAmino_10mms_0g_run2	1	208	3.26695	0.890204
ButylAmino_10mms_0g_run2	1	209	3.26808	0.899961
ButylAmino_10mms_0g_run2	1	210	3.26922	0.918475
ButylAmino_10mms_0g_run2	1	211	3.27035	0.884327
ButylAmino_10mms_0g_run2	1	212	3.27148	0.919984
ButylAmino_10mms_0g_run2	1	213	3.27596	0.908464
ButylAmino_10mms_0g_run2	1	214	3.2771	0.903644
ButylAmino_10mms_0g_run2	1	215	3.27823	0.909561
ButylAmino_10mms_0g_run2	1	216	3.27936	0.912578
ButylAmino_10mms_0g_run2	1	217	3.2805	0.909483
ButylAmino_10mms_0g_run2	1	218	3.28497	0.900137
ButylAmino_10mms_0g_run2	1	219	3.2861	0.91728
ButylAmino_10mms_0g_run2	1	220	3.28724	0.919004
ButylAmino_10mms_0g_run2	1	221	3.28837	0.909698
ButylAmino_10mms_0g_run2	1	222	3.2895	0.934247
ButylAmino_10mms_0g_run2	1	223	3.29396	0.90721
ButylAmino_10mms_0g_run2	1	224	3.2951	0.913832
ButylAmino_10mms_0g_run2	1	225	3.29623	0.90431
ButylAmino_10mms_0g_run2	1	226	3.29737	0.91583
ButylAmino_10mms_0g_run2	1	227	3.2985	0.903899
ButylAmino_10mms_0g_run2	1	228	3.30297	0.916595
ButylAmino_10mms_0g_run2	1	229	3.30411	0.899099
ButylAmino_10mms_0g_run2	1	230	3.30524	0.927605
ButylAmino_10mms_0g_run2	1	231	3.30638	0.904487
ButylAmino_10mms_0g_run2	1	232	3.30751	0.958306
ButylAmino_10mms_0g_run2	1	233	3.31197	0.919866
ButylAmino_10mms_0g_run2	1	234	3.3131	0.927311
ButylAmino_10mms_0g_run2	1	235	3.31424	0.926919
ButylAmino_10mms_0g_run2	1	236	3.31537	0.918652
ButylAmino_10mms_0g_run2	1	237	3.31651	0.915928
ButylAmino_10mms_0g_run2	1	238	3.32096	0.923844
ButylAmino_10mms_0g_run2	1	239	3.32209	0.922962
ButylAmino_10mms_0g_run2	1	240	3.32323	0.933894
ButylAmino_10mms_0g_run2	1	241	3.32436	0.935266
ButylAmino_10mms_0g_run2	1	242	3.32549	0.947138
ButylAmino_10mms_0g_run2	1	243	3.32996	0.91442
ButylAmino_10mms_0g_run2	1	244	3.3311	0.928546
ButylAmino_10mms_0g_run2	1	245	3.33223	0.891556
ButylAmino_10mms_0g_run2	1	246	3.33337	0.890478
ButylAmino_10mms_0g_run2	1	247	3.3345	0.869887
ButylAmino_10mms_0g_run2	1	248	3.33897	0.826256
ButylAmino_10mms_0g_run2	1	249	3.34011	0.795908
ButylAmino_10mms_0g_run2	1	250	3.34124	0.818831
ButylAmino_10mms_0g_run2	1	251	3.34237	0.793636
ButylAmino_10mms_0g_run2	1	252	3.34351	0.780215
ButylAmino_10mms_0g_run2	1	253	3.34797	0.756039
ButylAmino_10mms_0g_run2	1	254	3.3491	0.737348
ButylAmino_10mms_0g_run2	1	255	3.35024	0.752571
ButylAmino_10mms_0g_run2	1	256	3.35137	0.755157
ButylAmino_10mms_0g_run2	1	257	3.3525	0.775141
ButylAmino_10mms_0g_run2	1	258	3.35696	0.763954
ButylAmino_10mms_0g_run2	1	259	3.3581	0.780294
ButylAmino_10mms_0g_run2	1	260	3.35923	0.745537
ButylAmino_10mms_0g_run2	1	261	3.36037	0.747457
ButylAmino_10mms_0g_run2	1	262	3.3615	0.740091
ButylAmino_10mms_0g_run2	1	263	3.36597	0.708685
ButylAmino_10mms_0g_run2	1	264	3.3671	0.704649
ButylAmino_10mms_0g_run2	1	265	3.36824	0.718305
ButylAmino_10mms_0g_run2	1	266	3.36937	0.732039
ButylAmino_10mms_0g_run2	1	267	3.37051	0.713681
ButylAmino_10mms_0g_run2	1	268	3.37497	0.735311
ButylAmino_10mms_0g_run2	2	1	4.06014	0.577459
ButylAmino_10mms_0g_run2	2	2	4.06127	0.575108
ButylAmino_10mms_0g_run2	2	3	4.0624	0.576166
ButylAmino_10mms_0g_run2	2	4	4.06354	0.577714
ButylAmino_10mms_0g_run2	2	5	4.068	0.576695
ButylAmino_10mms_0g_run2	2	6	4.06914	0.576597
ButylAmino_10mms_0g_run2	2	7	4.07027	0.567545
ButylAmino_10mms_0g_run2	2	8	4.0714	0.563274
ButylAmino_10mms_0g_run2	2	9	4.07254	0.57836
ButylAmino_10mms_0g_run2	2	10	4.077	0.56298
ButylAmino_10mms_0g_run2	2	11	4.07813	0.581554
ButylAmino_10mms_0g_run2	2	12	4.07927	0.558474
ButylAmino_10mms_0g_run2	2	13	4.0804	0.573443
ButylAmino_10mms_0g_run2	2	14	4.08154	0.570876
ButylAmino_10mms_0g_run2	2	15	4.086	0.581142
ButylAmino_10mms_0g_run2	2	16	4.08714	0.581377
ButylAmino_10mms_0g_run2	2	17	4.08827	0.600225
ButylAmino_10mms_0g_run2	2	18	4.08941	0.607121
ButylAmino_10mms_0g_run2	2	19	4.09054	0.609962
ButylAmino_10mms_0g_run2	2	20	4.095	0.716327
ButylAmino_10mms_0g_run2	2	21	4.09614	0.741209
ButylAmino_10mms_0g_run2	2	22	4.09728	0.7733
ButylAmino_10mms_0g_run2	2	23	4.09841	0.781039
ButylAmino_10mms_0g_run2	2	24	4.09954	0.79109
ButylAmino_10mms_0g_run2	2	25	4.104	0.815011
ButylAmino_10mms_0g_run2	2	26	4.10514	0.854274
ButylAmino_10mms_0g_run2	2	27	4.10627	0.831449
ButylAmino_10mms_0g_run2	2	28	4.10741	0.86885
ButylAmino_10mms_0g_run2	2	29	4.10854	0.874316
ButylAmino_10mms_0g_run2	2	30	4.113	0.876687
ButylAmino_10mms_0g_run2	2	31	4.11414	0.868556
ButylAmino_10mms_0g_run2	2	32	4.11527	0.875962
ButylAmino_10mms_0g_run2	2	33	4.11641	0.844948
ButylAmino_10mms_0g_run2	2	34	4.11754	0.839658
ButylAmino_10mms_0g_run2	2	35	4.12197	0.829784
ButylAmino_10mms_0g_run2	2	36	4.12307	0.845947
ButylAmino_10mms_0g_run2	2	37	4.12418	0.833996
ButylAmino_10mms_0g_run2	2	38	4.12528	0.858016
ButylAmino_10mms_0g_run2	2	39	4.12638	0.82902
ButylAmino_10mms_0g_run2	2	40	4.13099	0.862992
ButylAmino_10mms_0g_run2	2	41	4.13212	0.840932
ButylAmino_10mms_0g_run2	2	42	4.13326	0.844145
ButylAmino_10mms_0g_run2	2	43	4.13439	0.849454
ButylAmino_10mms_0g_run2	2	44	4.13552	0.855841
ButylAmino_10mms_0g_run2	2	45	4.14001	0.860641
ButylAmino_10mms_0g_run2	2	46	4.14114	0.903685
ButylAmino_10mms_0g_run2	2	47	4.14227	0.863423
ButylAmino_10mms_0g_run2	2	48	4.1434	0.881957
ButylAmino_10mms_0g_run2	2	49	4.14454	0.862052
ButylAmino_10mms_0g_run2	2	50	4.149	0.866989
ButylAmino_10mms_0g_run2	2	51	4.15014	0.835328
ButylAmino_10mms_0g_run2	2	52	4.15127	0.885288
ButylAmino_10mms_0g_run2	2	53	4.15241	0.856488
ButylAmino_10mms_0g_run2	2	54	4.15354	0.855723
ButylAmino_10mms_0g_run2	2	55	4.158	0.880292
ButylAmino_10mms_0g_run2	2	56	4.15914	0.873591
ButylAmino_10mms_0g_run2	2	57	4.16027	0.870986
ButylAmino_10mms_0g_run2	2	58	4.1614	0.844341
ButylAmino_10mms_0g_run2	2	59	4.16254	0.863815
ButylAmino_10mms_0g_run2	2	60	4.16701	0.82757
ButylAmino_10mms_0g_run2	2	61	4.16815	0.84965
ButylAmino_10mms_0g_run2	2	62	4.16928	0.835191
ButylAmino_10mms_0g_run2	2	63	4.17041	0.860445
ButylAmino_10mms_0g_run2	2	64	4.17155	0.852745
ButylAmino_10mms_0g_run2	2	65	4.17601	0.879665
ButylAmino_10mms_0g_run2	2	66	4.17714	0.855763
ButylAmino_10mms_0g_run2	2	67	4.17828	0.868968
ButylAmino_10mms_0g_run2	2	68	4.17941	0.872925
ButylAmino_10mms_0g_run2	2	69	4.18054	0.851688
ButylAmino_10mms_0g_run2	2	70	4.185	0.851962
ButylAmino_10mms_0g_run2	2	71	4.18614	0.856683
ButylAmino_10mms_0g_run2	2	72	4.18727	0.882466
ButylAmino_10mms_0g_run2	2	73	4.18841	0.854332
ButylAmino_10mms_0g_run2	2	74	4.18954	0.864599
ButylAmino_10mms_0g_run2	2	75	4.19401	0.868341
ButylAmino_10mms_0g_run2	2	76	4.19514	0.870496
ButylAmino_10mms_0g_run2	2	77	4.19627	0.876295
ButylAmino_10mms_0g_run2	2	78	4.19741	0.862816
ButylAmino_10mms_0g_run2	2	79	4.19854	0.877627
ButylAmino_10mms_0g_run2	2	80	4.20301	0.868968
ButylAmino_10mms_0g_run2	2	81	4.20414	0.862894
ButylAmino_10mms_0g_run2	2	82	4.20528	0.858956
ButylAmino_10mms_0g_run2	2	83	4.20641	0.873611
ButylAmino_10mms_0g_run2	2	84	4.20754	0.874414
ButylAmino_10mms_0g_run2	2	85	4.21201	0.875786
ButylAmino_10mms_0g_run2	2	86	4.21314	0.857467
ButylAmino_10mms_0g_run2	2	87	4.21428	0.875237
ButylAmino_10mms_0g_run2	2	88	4.21541	0.873826
ButylAmino_10mms_0g_run2	2	89	4.21655	0.842558
ButylAmino_10mms_0g_run2	2	90	4.22101	0.87124
ButylAmino_10mms_0g_run2	2	91	4.22214	0.875746
ButylAmino_10mms_0g_run2	2	92	4.22327	0.894829
ButylAmino_10mms_0g_run2	2	93	4.22441	0.887404
ButylAmino_10mms_0g_run2	2	94	4.22554	0.902764
ButylAmino_10mms_0g_run2	2	95	4.23001	0.863854
ButylAmino_10mms_0g_run2	2	96	4.23114	0.888383
ButylAmino_10mms_0g_run2	2	97	4.23227	0.855841
ButylAmino_10mms_0g_run2	2	98	4.23341	0.855645
ButylAmino_10mms_0g_run2	2	99	4.23454	0.890597
ButylAmino_10mms_0g_run2	2	100	4.23901	0.892517
ButylAmino_10mms_0g_run2	2	101	4.24015	0.86115
ButylAmino_10mms_0g_run2	2	102	4.24128	0.906388
ButylAmino_10mms_0g_run2	2	103	4.24242	0.891713
ButylAmino_10mms_0g_run2	2	104	4.24355	0.883994
ButylAmino_10mms_0g_run2	2	105	4.24801	0.8693
ButylAmino_10mms_0g_run2	2	106	4.24914	0.864383
ButylAmino_10mms_0g_run2	2	107	4.25028	0.85872
ButylAmino_10mms_0g_run2	2	108	4.25141	0.888677
ButylAmino_10mms_0g_run2	2	109	4.25254	0.858858
ButylAmino_10mms_0g_run2	2	110	4.25701	0.879723
ButylAmino_10mms_0g_run2	2	111	4.25814	0.910424
ButylAmino_10mms_0g_run2	2	112	4.25928	0.906153
ButylAmino_10mms_0g_run2	2	113	4.26041	0.88901
ButylAmino_10mms_0g_run2	2	114	4.26155	0.893888
ButylAmino_10mms_0g_run2	2	115	4.26598	0.885679
ButylAmino_10mms_0g_run2	2	116	4.26708	0.866146
ButylAmino_10mms_0g_run2	2	117	4.26818	0.893085
ButylAmino_10mms_0g_run2	2	118	4.26928	0.874845
ButylAmino_10mms_0g_run2	2	119	4.27039	0.890146
ButylAmino_10mms_0g_run2	2	120	4.275	0.903508
ButylAmino_10mms_0g_run2	2	121	4.27613	0.890812
ButylAmino_10mms_0g_run2	2	122	4.27726	0.875824
ButylAmino_10mms_0g_run2	2	123	4.2784	0.880448
ButylAmino_10mms_0g_run2	2	124	4.27953	0.888167
ButylAmino_10mms_0g_run2	2	125	4.28401	0.860719
ButylAmino_10mms_0g_run2	2	126	4.28515	0.873375
ButylAmino_10mms_0g_run2	2	127	4.28628	0.889382
ButylAmino_10mms_0g_run2	2	128	4.28741	0.871925
ButylAmino_10mms_0g_run2	2	129	4.28855	0.890205
ButylAmino_10mms_0g_run2	2	130	4.29301	0.859798
ButylAmino_10mms_0g_run2	2	131	4.29415	0.90147
ButylAmino_10mms_0g_run2	2	132	4.29528	0.878548
ButylAmino_10mms_0g_run2	2	133	4.29641	0.890518
ButylAmino_10mms_0g_run2	2	134	4.29755	0.892223
ButylAmino_10mms_0g_run2	2	135	4.30201	0.894828
ButylAmino_10mms_0g_run2	2	136	4.30314	0.899452
ButylAmino_10mms_0g_run2	2	137	4.30428	0.89042
ButylAmino_10mms_0g_run2	2	138	4.30541	0.900373
[truncated: 33,602 more rows]

## Sheet: APTMS
VariableName	CellIndex	RowIndex	Time (s)	Force (N)
[truncated: 34,812 more rows]
